# Supplementary material for: A Revision of Malagasy Species of Anochetus Mayr and Odontomachus Latreille (Hymenoptera: Formicidae)
Source: PLoS One. 2008 May 28;3(5):e1787. doi: 10.1371/journal.pone.0001787 (PMC2387237; doi:10.1371/journal.pone.0001787)
Supplement: Appendix S1 — Accessions and collection information for all sequences created in this study. (0.64 MB XLS) [file pone.0001787.s001.xls]

## Sheet: Lab
Project :	Revision of Malagasy Anochetus and Odontomachus
Created :	10-October-2007	Alex Smith	GENBANK ACCESSIONS
Process ID	Sample ID	Field Num	CO1	18S	ITS1	28S	Identification	CO1 Seq Length	Collection Date	Extra Info	Institution	Genus	Species	Identifier	Identifier email	Collectors	Date Collected	Country/Ocean	Province	Region	Sector	Exact Site	Lat	Lon	Elev	Notes
ASAM848-05	CASENT0005967-D01	BLF01944	EF610900				Odontomachus coquereli	614	19-Oct-1998	Manon 1175	California Academy of Sciences	Odontomachus	Odontomachus coquereli	Brian Fisher	bfisher@calacademy.org	B.L.Fisher	19-Oct-1998	Madagascar	Antsiranana, Faritany d'		Manon 1175	R.S. Manongarivo, 14.5 km 220° SW Antanambao	-13.998	48.428	1175	EB15 ex rotten stick on ground|montane rainforest|1w|BOX-0422|http://www.antweb.org/specimen.do?name=CASENT0005967-D01
JDWAM786-05	CASENT0006309-D01	BLF02043	EF610818				Anochetus madagascarensis	657	20-Nov-1998	Mandena	California Academy of Sciences	Anochetus	Anochetus madagascarensis	Brian Fisher	bfisher@calacademy.org	B.L.Fisher	20-Nov-1998	Madagascar	Toliara		Mandena	Mandena, 8.4 km NNE 30° Tolagnaro	-24.952	47.002	20	EG13 ex rotten log|littoral rainforest|1w|BOX-0167|http://www.antweb.org/specimen.do?name=CASENT0006309-D01
JDWAM787-05	CASENT0006312-D01	BLF02093	EF610820				Anochetus madagascarensis	657	22-Nov-1998	Petriky	California Academy of Sciences	Anochetus	Anochetus madagascarensis	Brian Fisher	bfisher@calacademy.org	B.L.Fisher	22-Nov-1998	Madagascar	Toliara		Petriky	Foret de Petriky, 12.5 km W 272° Tolagnaro	-25.062	46.87	10	EG13 ex rotten log|littoral rainforest|1w|BOX-0167|http://www.antweb.org/specimen.do?name=CASENT0006312-D01
JDWAM774-05	CASENT0006732-D01	BLF00696	EF610720				Anochetus grandidieri	358	25-Sep-1993	Andri 785	California Academy of Sciences	Anochetus	Anochetus grandidieri	Brian Fisher	bfisher@calacademy.org	B.L.Fisher	25-Sep-1993	Madagascar	Fianarantsoa		Andri 785	45km S. Ambalavao	-22.217	47.017	785	EC19 sifted litter|rainforest|1w|BOX-0167|http://www.antweb.org/specimen.do?name=CASENT0006732-D01
JDWAM775-05	CASENT0006733-D01	BLF00696	EF610723				Anochetus grandidieri	600	25-Sep-1993	Andri 785	California Academy of Sciences	Anochetus	Anochetus grandidieri	Brian Fisher	bfisher@calacademy.org	B.L.Fisher	25-Sep-1993	Madagascar	Fianarantsoa		Andri 785	45km S. Ambalavao	-22.217	47.017	785	EC19 sifted litter|rainforest|1w|BOX-0167|http://www.antweb.org/specimen.do?name=CASENT0006733-D01
JDWAM776-05	CASENT0006734-D01	BLF00886	EF610727				Anochetus grandidieri	430	14-Nov-1993	Amban 25	California Academy of Sciences	Anochetus	Anochetus grandidieri	Brian Fisher	bfisher@calacademy.org	B.L.Fisher	14-Nov-1993	Madagascar	Toamasina		Amban 25	6.3 km S Ambanizana, Andranobe	-15.683	49.95	25	EC19 sifted litter|rainforest|1w|BOX-0167|http://www.antweb.org/specimen.do?name=CASENT0006734-D01
JDWAM777-05	CASENT0006735-D01	BLF00886	EF610730				Anochetus grandidieri	603	14-Nov-1993	Amban 25	California Academy of Sciences	Anochetus	Anochetus grandidieri	Brian Fisher	bfisher@calacademy.org	B.L.Fisher	14-Nov-1993	Madagascar	Toamasina		Amban 25	6.3 km S Ambanizana, Andranobe	-15.683	49.95	25	EC19 sifted litter|rainforest|1w|BOX-0167|http://www.antweb.org/specimen.do?name=CASENT0006735-D01
JDWAM778-05	CASENT0006737-D01	BLF01414	EF610732				Anochetus grandidieri	426	10-Apr-1997	Tampolo 10a	California Academy of Sciences	Anochetus	Anochetus grandidieri	Brian Fisher	bfisher@calacademy.org	B.L.Fisher	10-Apr-1997	Madagascar	Toamasina		Tampolo 10a	S.F. Tampolo, 10 km NNE Fenoarivo Atn.	-17.283	49.417	10	EG10 sifted litter|littoral rainforest|1w|BOX-0167|http://www.antweb.org/specimen.do?name=CASENT0006737-D01
JDWAM780-05	CASENT0006739-D01	BLF01862	EF610736				Anochetus grandidieri	558	11-Oct-1998	Manon 780	California Academy of Sciences	Anochetus	Anochetus grandidieri	Brian Fisher	bfisher@calacademy.org	B.L.Fisher	11-Oct-1998	Madagascar	Antsiranana, Faritany d'		Manon 780	R.S. Manongarivo, 12.8 km 228° SW Antanambao	-13.977	48.423	780	EC19 sifted litter|rainforest|1w|BOX-0167|http://www.antweb.org/specimen.do?name=CASENT0006739-D01
JDWAM781-05	CASENT0006740-D01	BLF01862	EF610699				Anochetus grandidieri	563	11-Oct-1998	Manon 780	California Academy of Sciences	Anochetus	Anochetus grandidieri	Brian Fisher	bfisher@calacademy.org	B.L.Fisher	11-Oct-1998	Madagascar	Antsiranana, Faritany d'		Manon 780	R.S. Manongarivo, 12.8 km 228° SW Antanambao	-13.977	48.423	780	EC19 sifted litter|rainforest|1w|BOX-0167|http://www.antweb.org/specimen.do?name=CASENT0006740-D01
JDWAM782-05	CASENT0006741-D01	BLF01996	EF610701				Anochetus grandidieri	545	08-Nov-1998	Manon 400	California Academy of Sciences	Anochetus	Anochetus grandidieri	Brian Fisher	bfisher@calacademy.org	B.L.Fisher	08-Nov-1998	Madagascar	Antsiranana, Faritany d'		Manon 400	R.S. Manongarivo, 10.8 km 229° SW Antanambao	-13.962	48.433	400	EC19 sifted litter|rainforest|1w|BOX-0167|http://www.antweb.org/specimen.do?name=CASENT0006741-D01
JDWAM783-05	CASENT0006742-D01	BLF02040	EF610704				Anochetus grandidieri	657	20-Nov-1998	Mandena	California Academy of Sciences	Anochetus	Anochetus grandidieri	Brian Fisher	bfisher@calacademy.org	B.L.Fisher	20-Nov-1998	Madagascar	Toliara		Mandena	Mandena, 8.4 km NNE 30° Tolagnaro	-24.952	47.002	20	EG10 sifted litter|littoral rainforest|1w|BOX-0167|http://www.antweb.org/specimen.do?name=CASENT0006742-D01
JDWAM784-05	CASENT0006743-D01	BLF02072	EF610707				Anochetus grandidieri	261	22-Nov-1998	Petriky	California Academy of Sciences	Anochetus	Anochetus grandidieri	Brian Fisher	bfisher@calacademy.org	B.L.Fisher	22-Nov-1998	Madagascar	Toliara		Petriky	Foret de Petriky, 12.5 km W 272° Tolagnaro	-25.062	46.87	10	EG10 sifted litter|littoral rainforest|1w|BOX-0167|http://www.antweb.org/specimen.do?name=CASENT0006743-D01
JDWAM785-05	CASENT0006744-D01	BLF02102	EF610710				Anochetus grandidieri	420	09-Dec-1998	St. Luce	California Academy of Sciences	Anochetus	Anochetus grandidieri	Brian Fisher	bfisher@calacademy.org	B.L.Fisher (J.-Baptiste)	09-Dec-1998	Madagascar	Toliara		St. Luce	2.7 km WNW 302° Ste. Luce	-24.772	47.172	20	EG10 sifted litter|littoral rainforest|1w|BOX-0167|http://www.antweb.org/specimen.do?name=CASENT0006744-D01
JDWAM788-05	CASENT0006745-D01	BLF02102	EF610822				Anochetus madagascarensis	657	09-Dec-1998	St. Luce	California Academy of Sciences	Anochetus	Anochetus madagascarensis	Brian Fisher	bfisher@calacademy.org	B.L.Fisher (J.-Baptiste)	09-Dec-1998	Madagascar	Toliara		St. Luce	2.7 km WNW 302° Ste. Luce	-24.772	47.172	20	EG10 sifted litter|littoral rainforest|1w|BOX-0167|http://www.antweb.org/specimen.do?name=CASENT0006745-D01
JDWAM789-05	CASENT0006746-D01	BLF03128	EF610824				Anochetus madagascarensis	657	22-Feb-2001	Francais 180	California Academy of Sciences	Anochetus	Anochetus madagascarensis	Brian Fisher	bfisher@calacademy.org	Fisher, Griswold et al.	22-Feb-2001	Madagascar	Antsiranana, Faritany d'		Francais 180	Montagne des Francais, 7.2 km 142° SE Antsiranana (=Diego Suarez)	-12.323	49.338	180	EF19 sifted litter|tropical dry forest|1w|BOX-0167|http://www.antweb.org/specimen.do?name=CASENT0006746-D01
JDWAM821-05	CASENT0006782-D01	BLF10744	EF610826				Anochetus madagascarensis	657	15-Apr-2004	TampoloE3 10	California Academy of Sciences	Anochetus	Anochetus madagascarensis	Brian Fisher	bfisher@calacademy.org	Malagasy ant team	15-Apr-2004	Madagascar	Toamasina		TampoloE3 10	Parcelle E3 Tampolo	-17.283	49.433	10	EG13 ex rotten log|littoral forest|1w|BOX-0167|http://www.antweb.org/specimen.do?name=CASENT0006782-D01
JDWAM790-05	CASENT0007161-D01	HJR070	EF610724				Anochetus grandidieri	608	16-Dec-1998	Didy	California Academy of Sciences	Anochetus	Anochetus grandidieri	Brian Fisher	bfisher@calacademy.org	H.J.Ratsirarson	16-Dec-1998	Madagascar	Toamasina		Didy	F.C. Didy	-18.198	48.578	960	EC13 ex rotten log|rainforest|1w|BOX-0167|http://www.antweb.org/specimen.do?name=CASENT0007161-D01
JDWAM822-05	CASENT0007163-D01	BLF02028	EF610829				Anochetus madagascarensis	657	08-Nov-1998	Manon 400	California Academy of Sciences	Anochetus	Anochetus madagascarensis	Brian Fisher	bfisher@calacademy.org	B.L.Fisher	08-Nov-1998	Madagascar	Antsiranana, Faritany d'		Manon 400	R.S. Manongarivo, 10.8 km 229° SW Antanambao	-13.962	48.433	400	EC13 ex rotten log|rainforest|1w|BOX-0167|http://www.antweb.org/specimen.do?name=CASENT0007163-D01
JDWAM823-05	CASENT0007166-D01	BLF01908	EF610831				Anochetus madagascarensis	524	11-Oct-1998	Manon 780	California Academy of Sciences	Anochetus	Anochetus madagascarensis	Brian Fisher	bfisher@calacademy.org	B.L.Fisher	11-Oct-1998	Madagascar	Antsiranana, Faritany d'		Manon 780	R.S. Manongarivo, 12.8 km 228° SW Antanambao	-13.977	48.423	780	EC13 ex rotten log|rainforest|1w|BOX-0167|http://www.antweb.org/specimen.do?name=CASENT0007166-D01
JDWAM791-05	CASENT0007167-D01	BLF01000	EF610725				Anochetus grandidieri	582	08-Dec-1993	Amban 825	California Academy of Sciences	Anochetus	Anochetus grandidieri	Brian Fisher	bfisher@calacademy.org	B.L.Fisher	08-Dec-1993	Madagascar	Toamasina		Amban 825	6.9 km NE Ambanizana, Ambohitsitondroina	-15.567	50	825	EC13 ex rotten log|rainforest|1w|BOX-0167|http://www.antweb.org/specimen.do?name=CASENT0007167-D01
ASAM3144-05	CASENT0008647-D01	ANTC1028	EF610957				Odontomachus coquereli	631	05-Oct-1996	Manantenina 450	California Academy of Sciences	Odontomachus	Odontomachus coquereli	Brian Fisher	bfisher@calacademy.org	E.L. Quinter	05-Oct-1996	Madagascar	Antsiranana, Faritany d'		Manantenina 450	RNI Marojejy, 8km NW Manantenina	-14.433	49.783	450	malaise trap|montane rainforest|right hind leg of worker|BOX-0588|http://www.antweb.org/specimen.do?name=CASENT0008647-D01
ASAM340-05	CASENT0009055-D01	RJ1959	EF610745				Anochetus madagascarensis	137	22-Feb-1999	Mt. Combani 470	California Academy of Sciences	Anochetus	Anochetus madagascarensis	Brian Fisher	bfisher@calacademy.org	R.Jocque & G.DeSmet	22-Feb-1999	Comoros		Mayotte	Mt. Combani 470	Mt. Combani	-12.8	45.133	470	winkler trap|forest litter|right hind leg of worker|BOX-0171|http://www.antweb.org/specimen.do?name=CASENT0009055-D01
ASAM344-05	CASENT0009058-D01	RJ1978	EF610747				Anochetus madagascarensis	289	26-Feb-1999	Sazile	California Academy of Sciences	Anochetus	Anochetus madagascarensis	Brian Fisher	bfisher@calacademy.org	R.Jocque & G.DeSmet	26-Feb-1999	Comoros		Mayotte	Sazile	Sazile	-12.967	45.167		winkler trap|dry forest litter|1w|BOX-0171|http://www.antweb.org/specimen.do?name=CASENT0009058-D01
ASAM345-05	CASENT0009058-D02	RJ1978	EF610748				Anochetus madagascarensis	290	26-Feb-1999	Sazile	California Academy of Sciences	Anochetus	Anochetus madagascarensis	Brian Fisher	bfisher@calacademy.org	R.Jocque & G.DeSmet	26-Feb-1999	Comoros		Mayotte	Sazile	Sazile	-12.967	45.167		winkler trap|dry forest litter|1w|BOX-0171|http://www.antweb.org/specimen.do?name=CASENT0009058-D02
ASAM343-05	CASENT0009059-D01	RJ1978	EF610746				Anochetus madagascarensis	298	26-Feb-1999	Sazile	California Academy of Sciences	Anochetus	Anochetus madagascarensis	Brian Fisher	bfisher@calacademy.org	R.Jocque & G.DeSmet	26-Feb-1999	Comoros		Mayotte	Sazile	Sazile	-12.967	45.167		winkler trap|dry forest litter|1w|BOX-0171|http://www.antweb.org/specimen.do?name=CASENT0009059-D01
ASAM348-05	CASENT0009062-D01	RJ1986	EF610737				Anochetus madagascarensis	454	14-Feb-1999	Dziani Karihani	California Academy of Sciences	Anochetus	Anochetus madagascarensis	Brian Fisher	bfisher@calacademy.org	R.Jocque & G.DeSmet	14-Feb-1999	Comoros		Mayotte	Dziani Karihani	Dziani Karihani	-12.783	45.117		pitfall trap|forest|1w|BOX-0171|http://www.antweb.org/specimen.do?name=CASENT0009062-D01
ASAM338-05	CASENT0009106-D01	RJ1917	EF610742				Anochetus madagascarensis	556	16-Feb-1999	Convalescence	California Academy of Sciences	Anochetus	Anochetus madagascarensis	Brian Fisher	bfisher@calacademy.org	R.Jocque & G.DeSmet	16-Feb-1999	Comoros		Mayotte	Convalescence	Convalescence	-12.767	45.183		|ruins|1w|BOX-0171|http://www.antweb.org/specimen.do?name=CASENT0009106-D01
ASAM339-05	CASENT0009107-D01	RJ1918	EF610744				Anochetus madagascarensis	556	16-Feb-1999	Convalescence	California Academy of Sciences	Anochetus	Anochetus madagascarensis	Brian Fisher	bfisher@calacademy.org	R.Jocque & G.DeSmet	16-Feb-1999	Comoros		Mayotte	Convalescence	Convalescence	-12.767	45.183		sweeping|road verges|1w|BOX-0171|http://www.antweb.org/specimen.do?name=CASENT0009107-D01
ASAM936-05	CASENT0009166-D01	BLF04082	EF611007				Odontomachus troglodytes	299	10-May-2001	Sangha 420	California Academy of Sciences	Odontomachus	Odontomachus troglodytes	Brian Fisher	bfisher@calacademy.org	B.L.Fisher	10-May-2001	Central African Republic	Sangha-Mbaere		Sangha 420	Reserve Speciale de Foret Dense de Dzanga-Sangha, 12.7 km 326° NW Bayanga	3.005	16.193	420	EC27 pitfall trap|rainforest|1w|BOX-0422|http://www.antweb.org/specimen.do?name=CASENT0009166-D01
ASAM938-05	CASENT0009199-D01	BLF04125	EF610996	EU042009			Odontomachus troglodytes	608	20-May-2001	Ndakan 350	California Academy of Sciences	Odontomachus	Odontomachus troglodytes	Brian Fisher	bfisher@calacademy.org	B.L.Fisher	20-May-2001	Central African Republic	Sangha-Mbaere		Ndakan 350	Parc National Dzanga-Ndoki, 38.6 km 173° S Lidjombo	2.36	16.053	350	EC27 pitfall trap|rainforest|1w|BOX-0422|http://www.antweb.org/specimen.do?name=CASENT0009199-D01
ASAM659-05	CASENT0009407-D01	BLF00739	EF610910		EU042087		Odontomachus coquereli	373	01-Oct-1993	Andri 785	California Academy of Sciences	Odontomachus	Odontomachus coquereli	Brian Fisher	bfisher@calacademy.org	B.L.Fisher	01-Oct-1993	Madagascar	Fianarantsoa		Andri 785	45km S. Ambalavao	-22.217	47.017	785	EC13 ex rotten log|rainforest|1w|BOX-0420|http://www.antweb.org/specimen.do?name=CASENT0009407-D01
ASAM660-05	CASENT0009408-D01	BLF01083	EF610913				Odontomachus coquereli	657	20-Oct-1994	Anja 875	California Academy of Sciences	Odontomachus	Odontomachus coquereli	Brian Fisher	bfisher@calacademy.org	B.L.Fisher	20-Oct-1994	Madagascar	Antsiranana, Faritany d'		Anja 875	6.5 km SSW Befingotra, Res. Anjanaharibe-Sud	-14.75	49.5	875	EC18 ground nest|rainforest|1w|BOX-0420|http://www.antweb.org/specimen.do?name=CASENT0009408-D01
ASAM661-05	CASENT0009409-D01	BLF01108	EF610915				Odontomachus coquereli	657	23-Oct-1994	Anja 875	California Academy of Sciences	Odontomachus	Odontomachus coquereli	Brian Fisher	bfisher@calacademy.org	B.L.Fisher	23-Oct-1994	Madagascar	Antsiranana, Faritany d'		Anja 875	6.5 km SSW Befingotra, Res. Anjanaharibe-Sud	-14.75	49.5	875	EC18 ground nest|rainforest|1w|BOX-0420|http://www.antweb.org/specimen.do?name=CASENT0009409-D01
ASAM933-05	CASENT0009456-D01	BLF02135	EF611002				Odontomachus troglodytes	657	24-Feb-2000	Doudou 110c	California Academy of Sciences	Odontomachus	Odontomachus troglodytes	Brian Fisher	bfisher@calacademy.org	B.L.Fisher	24-Feb-2000	Gabon	Ogooue-Maritime		Doudou 110c	Reserve de Faune de la Moukalaba-Dougoua, 12.2 km 305° NW Doussala	-2.317	10.533	110	EC13 ex rotten log|rainforest|1w|BOX-0422|http://www.antweb.org/specimen.do?name=CASENT0009456-D01
ASAM934-05	CASENT0009457-D01	BLF02305	EF611004				Odontomachus troglodytes	657	09-Apr-2000	Ebodje	California Academy of Sciences	Odontomachus	Odontomachus troglodytes	Brian Fisher	bfisher@calacademy.org	B.L.Fisher	09-Apr-2000	Cameroon		Sud	Ebodje	Res. de Faune de Campo, 2.16 km 106° ESE Ebodje	2.568	9.844	10	EG15 ex dead twig above ground|littoral rainforest|1w|BOX-0422|http://www.antweb.org/specimen.do?name=CASENT0009457-D01
ASAM940-05	CASENT0009459-D01	BLF04126	EF610898				Odontomachus assiniensis	285	20-May-2001	Ndakan 350	California Academy of Sciences	Odontomachus	Odontomachus assiniensis	Brian Fisher	bfisher@calacademy.org	B.L.Fisher	20-May-2001	Central African Republic	Sangha-Mbaere		Ndakan 350	Parc National Dzanga-Ndoki, 38.6 km 173° S Lidjombo	2.36	16.053	350	EC27 pitfall trap|rainforest|1w|BOX-0422|http://www.antweb.org/specimen.do?name=CASENT0009459-D01
ASAM847-05	CASENT0009483-D01	BLF01942	EF610922				Odontomachus coquereli	657	19-Oct-1998	Manon 1175	California Academy of Sciences	Odontomachus	Odontomachus coquereli	Brian Fisher	bfisher@calacademy.org	B.L.Fisher	19-Oct-1998	Madagascar	Antsiranana, Faritany d'		Manon 1175	R.S. Manongarivo, 14.5 km 220° SW Antanambao	-13.998	48.428	1175	EB13 ex root mat, ground layer|montane rainforest|1w|BOX-0422|http://www.antweb.org/specimen.do?name=CASENT0009483-D01
ASAM853-05	CASENT0009484-D01	BLF01960	EF610907				Odontomachus coquereli	649	19-Oct-1998	Manon 1175	California Academy of Sciences	Odontomachus	Odontomachus coquereli	Brian Fisher	bfisher@calacademy.org	B.L.Fisher	19-Oct-1998	Madagascar	Antsiranana, Faritany d'		Manon 1175	R.S. Manongarivo, 14.5 km 220° SW Antanambao	-13.998	48.428	1175	EB03 ex rotten log|montane rainforest|1w|BOX-0422|http://www.antweb.org/specimen.do?name=CASENT0009484-D01
ASAM849-05	CASENT0009615-D01	BLF01415	EF610997		EU042088		Odontomachus troglodytes	657	10-Apr-1997	Tampolo 10b	California Academy of Sciences	Odontomachus	Odontomachus troglodytes	Brian Fisher	bfisher@calacademy.org	B.L.Fisher	10-Apr-1997	Madagascar	Toamasina		Tampolo 10b	S.F. Tampolo, 10 km NNE Fenoarivo Atn.	-17.283	49.433	10	EG13 ex rotten log|littoral rainforest|1l|BOX-0422|http://www.antweb.org/specimen.do?name=CASENT0009615-D01
ASAM850-05	CASENT0009616-D01	BLF01416	EF610998		EU042089		Odontomachus troglodytes	657	10-Apr-1997	Tampolo 10b	California Academy of Sciences	Odontomachus	Odontomachus troglodytes	Brian Fisher	bfisher@calacademy.org	B.L.Fisher	10-Apr-1997	Madagascar	Toamasina		Tampolo 10b	S.F. Tampolo, 10 km NNE Fenoarivo Atn.	-17.283	49.433	10	EG13 ex rotten log|littoral rainforest|1p|BOX-0422|http://www.antweb.org/specimen.do?name=CASENT0009616-D01
ASAM851-05	CASENT0009617-D01	BLF01445	EF610999		EU042090		Odontomachus troglodytes	657	12-Apr-1997	Tampolo 10a	California Academy of Sciences	Odontomachus	Odontomachus troglodytes	Brian Fisher	bfisher@calacademy.org	B.L.Fisher	12-Apr-1997	Madagascar	Toamasina		Tampolo 10a	S.F. Tampolo, 10 km NNE Fenoarivo Atn.	-17.283	49.417	10	EG13 ex rotten log|littoral rainforest|1l|BOX-0422|http://www.antweb.org/specimen.do?name=CASENT0009617-D01
ASAM044-05	CASENT0011443-D01	BLF11041	EF610887	EU041998			Anochetus boltoni	655	27-Nov-2004	Ambanitaza 240	California Academy of Sciences	Anochetus	Anochetus boltoni	Brian Fisher	bfisher@calacademy.org	B.L.Fisher	27-Nov-2004	Madagascar	Antsiranana, Faritany d'		Ambanitaza 240	Foret Ambanitaza, 26.1 km 347° Antalaha	-14.679	50.184	240	EC13 ex rotten log|rainforest|1l|BOX-0168|http://www.antweb.org/specimen.do?name=CASENT0011443-D01
ASAM045-05	CASENT0011443-D02	BLF11041	EF610888	EU041999	EU042085		Anochetus boltoni	657	27-Nov-2004	Ambanitaza 240	California Academy of Sciences	Anochetus	Anochetus boltoni	Brian Fisher	bfisher@calacademy.org	B.L.Fisher	27-Nov-2004	Madagascar	Antsiranana, Faritany d'		Ambanitaza 240	Foret Ambanitaza, 26.1 km 347° Antalaha	-14.679	50.184	240	EC13 ex rotten log|rainforest|1w|BOX-0168|http://www.antweb.org/specimen.do?name=CASENT0011443-D02
ASAM046-05	CASENT0011443-D03	BLF11041	EF610889	EU042000	EU042086		Anochetus boltoni	656	27-Nov-2004	Ambanitaza 240	California Academy of Sciences	Anochetus	Anochetus boltoni	Brian Fisher	bfisher@calacademy.org	B.L.Fisher	27-Nov-2004	Madagascar	Antsiranana, Faritany d'		Ambanitaza 240	Foret Ambanitaza, 26.1 km 347° Antalaha	-14.679	50.184	240	EC13 ex rotten log|rainforest|1w|BOX-0168|http://www.antweb.org/specimen.do?name=CASENT0011443-D03
ASAM349-05	CASENT0011504-D01	RJ1943	EF610738				Anochetus madagascarensis	629	22-Feb-1999	Mt. Combani 470	California Academy of Sciences	Anochetus	Anochetus madagascarensis	Brian Fisher	bfisher@calacademy.org	R.Jocque & G.DeSmet	22-Feb-1999	Comoros		Mayotte	Mt. Combani 470	Mt. Combani	-12.8	45.133	470	winkler trap|forest litter|right hind leg of worker|BOX-0171|http://www.antweb.org/specimen.do?name=CASENT0011504-D01
ASAM351-05	CASENT0011505-D01	RJ1955	EF610740				Anochetus madagascarensis	292	23-Feb-1999	Mt. Benara 630	California Academy of Sciences	Anochetus	Anochetus madagascarensis	Brian Fisher	bfisher@calacademy.org	R.Jocque & G.DeSmet	23-Feb-1999	Comoros		Mayotte	Mt. Benara 630	Mt. Benara	-12.867	45.183	630	winkler trap|forest litter|right hind leg of dealate queen|BOX-0171|http://www.antweb.org/specimen.do?name=CASENT0011505-D01
ASAM350-05	CASENT0011506-D01	RJ1955	EF610739				Anochetus madagascarensis	137	23-Feb-1999	Mt. Benara 630	California Academy of Sciences	Anochetus	Anochetus madagascarensis	Brian Fisher	bfisher@calacademy.org	R.Jocque & G.DeSmet	23-Feb-1999	Comoros		Mayotte	Mt. Benara 630	Mt. Benara	-12.867	45.183	630	winkler trap|forest litter|right hind leg of worker|BOX-0171|http://www.antweb.org/specimen.do?name=CASENT0011506-D01
ASAM352-05	CASENT0011507-D01	RJ1996	EF610741				Anochetus madagascarensis	290	27-Feb-1999	Tsingoni	California Academy of Sciences	Anochetus	Anochetus madagascarensis	Brian Fisher	bfisher@calacademy.org	R.Jocque & G.DeSmet	27-Feb-1999	Comoros		Mayotte	Tsingoni	Tsingoni	-12.783	45.1		winkler trap|litter of shrubs on mangrove edge|1w|BOX-0171|http://www.antweb.org/specimen.do?name=CASENT0011507-D01
ASAM353-05	CASENT0011508-D01	RJ1982	EF610743				Anochetus madagascarensis	137	15-Feb-1999	Mt. Choungui 360	California Academy of Sciences	Anochetus	Anochetus madagascarensis	Brian Fisher	bfisher@calacademy.org	R.Jocque & G.DeSmet	15-Feb-1999	Comoros		Mayotte	Mt. Choungui 360	Mt. Choungui	-12.8	45.1	360	pitfall trap|forest near fallen tree|1w|BOX-0171|http://www.antweb.org/specimen.do?name=CASENT0011508-D01
ASAMI170-07	CASENT0012708-D01	FJVL301K01	EF999929			EU042029	Odontomachus simillimus	652	30-Jun-2002	Colo-i-Suva 340	California Academy of Sciences	Odontomachus	Odontomachus simillimus	Brian Fisher	bfisher@calacademy.org	M.Tokota'a	30-Jun-2002	Fiji			Colo-i-Suva 340	Viti Levu, Nakobalevu, 1.5km NE Colo-i-Suva Village	-18.05	178.417	340	winkler 2||1w|BOX-1938|http://www.antweb.org/specimen.do?name=CASENT0012708-D01
ASAMI171-07	CASENT0012708-D02	FJVL301K01	EF999930			EF999930	Odontomachus simillimus	284	30-Jun-2002	Colo-i-Suva 340	California Academy of Sciences	Odontomachus	Odontomachus simillimus	Brian Fisher	bfisher@calacademy.org	M.Tokota'a	30-Jun-2002	Fiji			Colo-i-Suva 340	Viti Levu, Nakobalevu, 1.5km NE Colo-i-Suva Village	-18.05	178.417	340	winkler 2||1w|BOX-1938|http://www.antweb.org/specimen.do?name=CASENT0012708-D02
ASAMI173-07	CASENT0012709-D02	FJKV41a	EF999931			EU042030	Odontomachus simillimus	416	09-Feb-2004	Moanakaka 60	California Academy of Sciences	Odontomachus	Odontomachus simillimus	Brian Fisher	bfisher@calacademy.org	Schlinger, Tokota'a	09-Feb-2004	Fiji		Kadavu	Moanakaka 60	Kadavu, 0.25km SW Solodamu Village, Moanakaka Bird Sanctuary	-19.078	178.121	60	Malaise||1m|BOX-1938|http://www.antweb.org/specimen.do?name=CASENT0012709-D02
ASAMI176-07	CASENT0012711-D01	FJVL03M0102	EF999932			EU042031	Odontomachus simillimus	361	07-Oct-2002	Koroyanitu	California Academy of Sciences	Odontomachus	Odontomachus simillimus	Brian Fisher	bfisher@calacademy.org	Schlinger, Tokoka'a	07-Oct-2002	Fiji		Vuda	Koroyanitu	Viti Levu Island, Koroyanitu N. M. P. 0.5 km N of Abaca Village	-17.666	177.55	800	Malaise||1m|BOX-1938|http://www.antweb.org/specimen.do?name=CASENT0012711-D01
ASAMI177-07	CASENT0012712-D01	EMS2079	EF999933			EU042032	Odontomachus simillimus	656	20-Jun-2005	Mt. Kuitarua 470	California Academy of Sciences	Odontomachus	Odontomachus simillimus	Brian Fisher	bfisher@calacademy.org	E.M.Sarnat	20-Jun-2005	Fiji			Mt. Kuitarua 470	Koro Island, Mudu District, Mt. Kuitarua, 3.7km NW Nasau Village	-17.292	179.403	470	||1w|BOX-1938|http://www.antweb.org/specimen.do?name=CASENT0012712-D01
ASAMI178-07	CASENT0012713-D01	FJVN57eM0503	EF999934			EU042033	Odontomachus simillimus	654	23-Apr-2004	Rokosalase	California Academy of Sciences	Odontomachus	Odontomachus simillimus	Brian Fisher	bfisher@calacademy.org	Schlinger, Tokota'a	23-Apr-2004	Fiji		Macuata	Rokosalase	Vanua Levu Island, 0.6 km S of Rokosalase Village	-16.533	179.018	180	Malaise|in forest|1m|BOX-1938|http://www.antweb.org/specimen.do?name=CASENT0012713-D01
ASAMI179-07	CASENT0012714-D01	FJVL327K01	EF999935			EU042034	Odontomachus simillimus	655	15-Jul-2003	Naboutini 300	California Academy of Sciences	Odontomachus	Odontomachus simillimus	Brian Fisher	bfisher@calacademy.org	W.Naisilisili	15-Jul-2003	Fiji		Serua	Naboutini 300	Viti Levu, 1.8km NW Naboutini Village	-18.22	177.817	300	winkler 1||1w|BOX-1938|http://www.antweb.org/specimen.do?name=CASENT0012714-D01
ASAMI180-07	CASENT0012714-D02	FJVL327K01	EF999936			EU042035	Odontomachus simillimus	508	15-Jul-2003	Naboutini 300	California Academy of Sciences	Odontomachus	Odontomachus simillimus	Brian Fisher	bfisher@calacademy.org	W.Naisilisili	15-Jul-2003	Fiji		Serua	Naboutini 300	Viti Levu, 1.8km NW Naboutini Village	-18.22	177.817	300	winkler 1||1w|BOX-1938|http://www.antweb.org/specimen.do?name=CASENT0012714-D02
ASAMI182-07	CASENT0012715-D02	FJVL302K01	EF999937			EF999937	Odontomachus simillimus	553	20-May-2002	Waivudawa 300	California Academy of Sciences	Odontomachus	Odontomachus simillimus	Brian Fisher	bfisher@calacademy.org	M.Tokota'a	20-May-2002	Fiji			Waivudawa 300	Viti Levu, Waivudawa, 6.0km NNW Lami Town	-18.41	178.363	300	winkler 2||1w|BOX-1938|http://www.antweb.org/specimen.do?name=CASENT0012715-D02
ASAMI183-07	CASENT0012716-D01	FJVL318K01	EF999938			EU042036	Odontomachus simillimus	657	23-May-2003	Nabukavesi 300	California Academy of Sciences	Odontomachus	Odontomachus simillimus	Brian Fisher	bfisher@calacademy.org	A.Rakabula	23-May-2003	Fiji			Nabukavesi 300	Viti Levu, near Nabukavesi Village	-18.117	178.25	300	winkler 2||1w|BOX-1938|http://www.antweb.org/specimen.do?name=CASENT0012716-D01
ASAMI184-07	CASENT0012716-D02	FJVL318K01	EF999939			EF999939	Odontomachus simillimus	653	23-May-2003	Nabukavesi 300	California Academy of Sciences	Odontomachus	Odontomachus simillimus	Brian Fisher	bfisher@calacademy.org	A.Rakabula	23-May-2003	Fiji			Nabukavesi 300	Viti Levu, near Nabukavesi Village	-18.117	178.25	300	winkler 2||1w|BOX-1938|http://www.antweb.org/specimen.do?name=CASENT0012716-D02
JDWAM841-05	CASENT0015325-D01	BLF04726	EF610876				Anochetus goodmani	657	06-Dec-2001	Kirindy Mite 80	California Academy of Sciences	Anochetus	Anochetus goodmani	Brian Fisher	bfisher@calacademy.org	Fisher-Griswold Arthropod Team	06-Dec-2001	Madagascar	Toliara		Kirindy Mite 80	Parc National de Kirindy Mite, 16.3 km 127° SE Belo sur Mer	-20.795	44.147	80	EF19 sifted litter (leaf mold, rotten wood)|tropical dry forest|1w|BOX-0167|http://www.antweb.org/specimen.do?name=CASENT0015325-D01
ASAM011-05	CASENT0015325-D02	BLF04726	EF610874	EU041969	EU042045		Anochetus goodmani	653	06-Dec-2001	Kirindy Mite 80	California Academy of Sciences	Anochetus	Anochetus goodmani	Brian Fisher	bfisher@calacademy.org	Fisher-Griswold Arthropod Team	06-Dec-2001	Madagascar	Toliara		Kirindy Mite 80	Parc National de Kirindy Mite, 16.3 km 127° SE Belo sur Mer	-20.795	44.147	80	EF19 sifted litter (leaf mold, rotten wood)|tropical dry forest|1w|BOX-0168|http://www.antweb.org/specimen.do?name=CASENT0015325-D02
JDWAM792-05	CASENT0017625-D01	BLF05316	EF610728				Anochetus grandidieri	657	03-Feb-2002	Bealoka 35	California Academy of Sciences	Anochetus	Anochetus grandidieri	Brian Fisher	bfisher@calacademy.org	Fisher-Griswold Arthropod Team	03-Feb-2002	Madagascar	Toliara		Bealoka 35	Reserve Prive Berenty, Foret de Bealoka, Mandrare River, 14.6 km 329° NNW Amboasary	-24.957	46.272	35	ER19 sifted litter (leaf mold, rotten wood)|gallery forest|1w|BOX-0167|http://www.antweb.org/specimen.do?name=CASENT0017625-D01
JDWAM842-05	CASENT0022239-D01	BLF06692	EF610877				Anochetus goodmani	653	19-Nov-2002	Androngonibe 30	California Academy of Sciences	Anochetus	Anochetus goodmani	Brian Fisher	bfisher@calacademy.org	Fisher, Griswold et al.	19-Nov-2002	Madagascar	Mahajanga		Androngonibe 30	Reserve Speciale de Bemarivo, 23.8 km 223° SW Besalampy	-16.925	44.368	30	EF19 sifted litter (leaf mold, rotten wood)|tropical dry forest|1w|BOX-0167|http://www.antweb.org/specimen.do?name=CASENT0022239-D01
ASAM012-05	CASENT0022239-D02	BLF06692	EF610840	EU041970	EU042046		Anochetus goodmani	657	19-Nov-2002	Androngonibe 30	California Academy of Sciences	Anochetus	Anochetus goodmani	Brian Fisher	bfisher@calacademy.org	Fisher, Griswold et al.	19-Nov-2002	Madagascar	Mahajanga		Androngonibe 30	Reserve Speciale de Bemarivo, 23.8 km 223° SW Besalampy	-16.925	44.368	30	EF19 sifted litter (leaf mold, rotten wood)|tropical dry forest|1w|BOX-0168|http://www.antweb.org/specimen.do?name=CASENT0022239-D02
JDWAM793-05	CASENT0022242-D01	BLF06692	EF610731				Anochetus grandidieri	657	19-Nov-2002	Androngonibe 30	California Academy of Sciences	Anochetus	Anochetus grandidieri	Brian Fisher	bfisher@calacademy.org	Fisher, Griswold et al.	19-Nov-2002	Madagascar	Mahajanga		Androngonibe 30	Reserve Speciale de Bemarivo, 23.8 km 223° SW Besalampy	-16.925	44.368	30	EF19 sifted litter (leaf mold, rotten wood)|tropical dry forest|1w|BOX-0167|http://www.antweb.org/specimen.do?name=CASENT0022242-D01
JDWAM794-05	CASENT0032649-D01	BLF06446	EF610733				Anochetus grandidieri	657	04-Nov-2002	Ambovonaomby 140	California Academy of Sciences	Anochetus	Anochetus grandidieri	Brian Fisher	bfisher@calacademy.org	Fisher, Griswold et al.	04-Nov-2002	Madagascar	Mahajanga		Ambovonaomby 140	Parc National de Namoroka, 9.8 km 300° WNW Vilanandro	-16.467	45.35	140	EF19 sifted litter (leaf mold, rotten wood)|tropical dry forest|1w|BOX-0167|http://www.antweb.org/specimen.do?name=CASENT0032649-D01
JDWAM795-05	CASENT0033481-D01	BLF08002	EF610734				Anochetus grandidieri	608	08-Mar-2003	Anjanaharibe 470	California Academy of Sciences	Anochetus	Anochetus grandidieri	Brian Fisher	bfisher@calacademy.org	Fisher, Griswold et al.	08-Mar-2003	Madagascar	Toamasina		Anjanaharibe 470	Montagne d'Anjanaharibe, 18.0 km 21° NNE Ambinanitelo	-15.188	49.615	470	EF19 sifted litter (leaf mold, rotten wood)|rainforest|1w|BOX-0167|http://www.antweb.org/specimen.do?name=CASENT0033481-D01
JDWAM796-05	CASENT0033490-D01	BLF08002	EF610700				Anochetus grandidieri	657	08-Mar-2003	Anjanaharibe 470	California Academy of Sciences	Anochetus	Anochetus grandidieri	Brian Fisher	bfisher@calacademy.org	Fisher, Griswold et al.	08-Mar-2003	Madagascar	Toamasina		Anjanaharibe 470	Montagne d'Anjanaharibe, 18.0 km 21° NNE Ambinanitelo	-15.188	49.615	470	EF19 sifted litter (leaf mold, rotten wood)|rainforest|1w|BOX-0167|http://www.antweb.org/specimen.do?name=CASENT0033490-D01
JDWAM797-05	CASENT0034581-D01	BLF08250	EF610702				Anochetus grandidieri	657	17-Mar-2003	Akirindro 600	California Academy of Sciences	Anochetus	Anochetus grandidieri	Brian Fisher	bfisher@calacademy.org	Fisher, Griswold et al.	17-Mar-2003	Madagascar	Toamasina		Akirindro 600	Montagne d'Akirindro 7.6 km 341° NNW Ambinanitelo	-15.288	49.548	600	EC19 sifted litter (leaf mold, rotten wood)|rainforest|1w|BOX-0167|http://www.antweb.org/specimen.do?name=CASENT0034581-D01
JDWAM798-05	CASENT0034592-D01	BLF08250	EF610705				Anochetus grandidieri	657	17-Mar-2003	Akirindro 600	California Academy of Sciences	Anochetus	Anochetus grandidieri	Brian Fisher	bfisher@calacademy.org	Fisher, Griswold et al.	17-Mar-2003	Madagascar	Toamasina		Akirindro 600	Montagne d'Akirindro 7.6 km 341° NNW Ambinanitelo	-15.288	49.548	600	EC19 sifted litter (leaf mold, rotten wood)|rainforest|1w|BOX-0167|http://www.antweb.org/specimen.do?name=CASENT0034592-D01
ASAM869-05	CASENT0043293-D01	BLF09800	EF610909	EU042004			Odontomachus coquereli	657	05-Dec-2003	Binara 1100	California Academy of Sciences	Odontomachus	Odontomachus coquereli	Brian Fisher	bfisher@calacademy.org	B.L.Fisher	05-Dec-2003	Madagascar	Antsiranana, Faritany d'		Binara 1100	Foret de Binara, 9.4km 235° SW Daraina	-13.263	49.6	1100	EB09 sifted litter (leaf mold, rotten wood)|montane rainforest|1w|BOX-0422|http://www.antweb.org/specimen.do?name=CASENT0043293-D01
ASAM3265-05	CASENT0043293-D02	BLF09800	EF610961				Odontomachus coquereli	657	05-Dec-2003	Binara 1100	California Academy of Sciences	Odontomachus	Odontomachus coquereli	Brian Fisher	bfisher@calacademy.org	B.L.Fisher	05-Dec-2003	Madagascar	Antsiranana, Faritany d'		Binara 1100	Foret de Binara, 9.4km 235° SW Daraina	-13.263	49.6	1100	EB09 sifted litter (leaf mold, rotten wood)|montane rainforest|right hind leg of worker|BOX-0588|http://www.antweb.org/specimen.do?name=CASENT0043293-D02
ASAM019-05	CASENT0043725-D01	BLF10260	EF610857	EU041976	EU042053		Anochetus goodmani	657	15-Dec-2003	Andavakoera 425	California Academy of Sciences	Anochetus	Anochetus goodmani	Brian Fisher	bfisher@calacademy.org	B.L.Fisher	15-Dec-2003	Madagascar	Antsiranana, Faritany d'		Andavakoera 425	Foret d' Andavakoera, 21.4km 75° ENE Ambilobe; 4.6km 356° N Betsiaka	-13.118	49.23	425	EC19 sifted litter (leaf mold, rotten wood)|rainforest|1w|BOX-0168|http://www.antweb.org/specimen.do?name=CASENT0043725-D01
ASAM020-05	CASENT0043725-D02	BLF10260	EF610862	EU041977	EU042054		Anochetus goodmani	657	15-Dec-2003	Andavakoera 425	California Academy of Sciences	Anochetus	Anochetus goodmani	Brian Fisher	bfisher@calacademy.org	B.L.Fisher	15-Dec-2003	Madagascar	Antsiranana, Faritany d'		Andavakoera 425	Foret d' Andavakoera, 21.4km 75° ENE Ambilobe; 4.6km 356° N Betsiaka	-13.118	49.23	425	EC19 sifted litter (leaf mold, rotten wood)|rainforest|1w|BOX-0168|http://www.antweb.org/specimen.do?name=CASENT0043725-D02
ASAM037-05	CASENT0045021-D01	BLF08722	EF610890	EU041993	EU042076		Anochetus boltoni	657	12-Nov-2003	Marojejy 450	California Academy of Sciences	Anochetus	Anochetus boltoni	Brian Fisher	bfisher@calacademy.org	B.L.Fisher et al.	12-Nov-2003	Madagascar	Antsiranana, Faritany d'		Marojejy 450	Parc National de Marojejy, Manantenina River, 28.0 km 38° NE Andapa, 8.2 km 333° NNW Manantenina	-14.437	49.775	450	EC19 sifted litter (leaf mold, rotten wood)|rainforest|middle right leg of mounted worker|BOX-0168|http://www.antweb.org/specimen.do?name=CASENT0045021-D01
JDWAM799-05	CASENT0047005-D01	BLF10627	EF610708				Anochetus grandidieri	657	24-Mar-2004	Torotorofotsy 1070	California Academy of Sciences	Anochetus	Anochetus grandidieri	Brian Fisher	bfisher@calacademy.org	Malagasy ant team	24-Mar-2004	Madagascar	Toamasina		Torotorofotsy 1070	Torotorofotsy	-18.871	48.347	1070	EB09 sifted litter (leaf mold, rotten wood)|montane rainforest, marsh edge|1w|BOX-0167|http://www.antweb.org/specimen.do?name=CASENT0047005-D01
JDWAM800-05	CASENT0047010-D01	BLF10627	EF610711				Anochetus grandidieri	657	24-Mar-2004	Torotorofotsy 1070	California Academy of Sciences	Anochetus	Anochetus grandidieri	Brian Fisher	bfisher@calacademy.org	Malagasy ant team	24-Mar-2004	Madagascar	Toamasina		Torotorofotsy 1070	Torotorofotsy	-18.871	48.347	1070	EB09 sifted litter (leaf mold, rotten wood)|montane rainforest, marsh edge|1w|BOX-0167|http://www.antweb.org/specimen.do?name=CASENT0047010-D01
JDWAM801-05	CASENT0047267-D01	BLF10839	EF610712				Anochetus grandidieri	657	14-Apr-2004	TampoloE3 10	California Academy of Sciences	Anochetus	Anochetus grandidieri	Brian Fisher	bfisher@calacademy.org	Malagasy ant team	14-Apr-2004	Madagascar	Toamasina		TampoloE3 10	Parcelle E3 Tampolo	-17.283	49.433	10	EG10 sifted litter (leaf mold, rotten wood)|littoral forest|1w|BOX-0167|http://www.antweb.org/specimen.do?name=CASENT0047267-D01
ASAM871-05	CASENT0047466-D01	BLF10731	EF611000	EU042005	EU042094	EU042025	Odontomachus troglodytes	657	14-Apr-2004	TampoloE3 10	California Academy of Sciences	Odontomachus	Odontomachus troglodytes	Brian Fisher	bfisher@calacademy.org	Malagasy ant team	14-Apr-2004	Madagascar	Toamasina		TampoloE3 10	Parcelle E3 Tampolo	-17.283	49.433	10	EG21 pitfall trap|littoral forest|1w|BOX-0422|http://www.antweb.org/specimen.do?name=CASENT0047466-D01
ASAM3273-05	CASENT0047484-D01	BLF08649	EF610934				Odontomachus coquereli	657	26-Feb-2003	Ambohitsi 800	California Academy of Sciences	Odontomachus	Odontomachus coquereli	Brian Fisher	bfisher@calacademy.org	D. Andriamalala, D. Silva, et al.	26-Feb-2003	Madagascar	Toamasina		Ambohitsi 800	Ambanizana, Parc National Masoala	-15.572	50.006	849	EB10 pitfall trap|montane rainforest|right hind leg of worker|BOX-0588|http://www.antweb.org/specimen.do?name=CASENT0047484-D01
ASAM874-05	CASENT0048295-D01	BLF10738	EF611005	EU042007	EU042096	EU042027	Odontomachus troglodytes	657	14-Apr-2004	TampoloE3 10	California Academy of Sciences	Odontomachus	Odontomachus troglodytes	Brian Fisher	bfisher@calacademy.org	Malagasy ant team	14-Apr-2004	Madagascar	Toamasina		TampoloE3 10	Parcelle E3 Tampolo	-17.283	49.433	10	EG13 ex rotten log|littoral forest|1p|BOX-0422|http://www.antweb.org/specimen.do?name=CASENT0048295-D01
ASAM860-05	CASENT0048894-D01	BLF08873	EF610919				Odontomachus coquereli	649	15-Nov-2003	Marojejy 775	California Academy of Sciences	Odontomachus	Odontomachus coquereli	Brian Fisher	bfisher@calacademy.org	B.L.Fisher et al.	15-Nov-2003	Madagascar	Antsiranana, Faritany d'		Marojejy 775	Parc National de Marojejy, Manantenina River, 27.6 km 35° NE Andapa, 9.6 km 327° NNW Manantenina	-14.435	49.76	775	EC31 yellow pan trap|rainforest|1w|BOX-0422|http://www.antweb.org/specimen.do?name=CASENT0048894-D01
ASAM3281-05	CASENT0048894-D02	BLF08873	EF610964				Odontomachus coquereli	618	15-Nov-2003	Marojejy 775	California Academy of Sciences	Odontomachus	Odontomachus coquereli	Brian Fisher	bfisher@calacademy.org	B.L.Fisher et al.	15-Nov-2003	Madagascar	Antsiranana, Faritany d'		Marojejy 775	Parc National de Marojejy, Manantenina River, 27.6 km 35° NE Andapa, 9.6 km 327° NNW Manantenina	-14.435	49.76	775	EC31 yellow pan trap|rainforest|right hind leg of worker|BOX-0588|http://www.antweb.org/specimen.do?name=CASENT0048894-D02
ASAM877-05	CASENT0048918-D01	BLF10829	EF611010				Odontomachus troglodytes	657	21-Apr-2004	Tampolo 10	California Academy of Sciences	Odontomachus	Odontomachus troglodytes	Brian Fisher	bfisher@calacademy.org	Malagasy ant team	21-Apr-2004	Madagascar	Toamasina		Tampolo 10	Tampolo	-17.283	49.417	10	EG15 ex dead twig above ground|littoral forest|1w|BOX-0422|http://www.antweb.org/specimen.do?name=CASENT0048918-D01
ASAM875-05	CASENT0048927-D01	BLF10782	EF611006	EU042008	EU042097	EU042028	Odontomachus troglodytes	657	17-Apr-2004	TampoloK7 10	California Academy of Sciences	Odontomachus	Odontomachus troglodytes	Brian Fisher	bfisher@calacademy.org	Malagasy ant team	17-Apr-2004	Madagascar	Toamasina		TampoloK7 10	Parcelle K7 Tampolo	-17.283	49.417	10	EG13 ex rotten log|littoral forest|1p|BOX-0422|http://www.antweb.org/specimen.do?name=CASENT0048927-D01
ASAM876-05	CASENT0048928-D01	BLF10824	EF611008				Odontomachus troglodytes	657	21-Apr-2004	Tampolo 10	California Academy of Sciences	Odontomachus	Odontomachus troglodytes	Brian Fisher	bfisher@calacademy.org	Malagasy ant team	21-Apr-2004	Madagascar	Toamasina		Tampolo 10	Tampolo	-17.283	49.417	10	EG13 ex rotten log|littoral forest|1w|BOX-0422|http://www.antweb.org/specimen.do?name=CASENT0048928-D01
ASAM873-05	CASENT0049196-D01	BLF10736	EF611003				Odontomachus troglodytes	656	14-Apr-2004	TampoloE3 10	California Academy of Sciences	Odontomachus	Odontomachus troglodytes	Brian Fisher	bfisher@calacademy.org	Malagasy ant team	14-Apr-2004	Madagascar	Toamasina		TampoloE3 10	Parcelle E3 Tampolo	-17.283	49.433	10	EG13 ex rotten log|littoral forest|1w|BOX-0422|http://www.antweb.org/specimen.do?name=CASENT0049196-D01
ASAM872-05	CASENT0049201-D01	BLF10733	EF611001	EU042006	EU042095	EU042026	Odontomachus troglodytes	657	14-Apr-2004	TampoloE3 10	California Academy of Sciences	Odontomachus	Odontomachus troglodytes	Brian Fisher	bfisher@calacademy.org	Malagasy ant team	14-Apr-2004	Madagascar	Toamasina		TampoloE3 10	Parcelle E3 Tampolo	-17.283	49.433	10	EG13 ex rotten log|littoral forest|1p|BOX-0422|http://www.antweb.org/specimen.do?name=CASENT0049201-D01
ASAM3284-05	CASENT0049291-D01	BLF08255	EF610977				Odontomachus coquereli	653	17-Mar-2003	Akirindro 600	California Academy of Sciences	Odontomachus	Odontomachus coquereli	Brian Fisher	bfisher@calacademy.org	Fisher, Griswold et al.	17-Mar-2003	Madagascar	Toamasina		Akirindro 600	Montagne d'Akirindro 7.6 km 341° NNW Ambinanitelo	-15.288	49.548	600	EC31 yellow pan trap|rainforest|right hind leg of worker|BOX-0588|http://www.antweb.org/specimen.do?name=CASENT0049291-D01
ASAM3288-05	CASENT0049797-D01	BLF08253	EF610937				Odontomachus coquereli	626	17-Mar-2003	Akirindro 600	California Academy of Sciences	Odontomachus	Odontomachus coquereli	Brian Fisher	bfisher@calacademy.org	Fisher, Griswold et al.	17-Mar-2003	Madagascar	Toamasina		Akirindro 600	Montagne d'Akirindro 7.6 km 341° NNW Ambinanitelo	-15.288	49.548	600	EC28 Malaise trap|rainforest|right hind leg of male|BOX-0588|http://www.antweb.org/specimen.do?name=CASENT0049797-D01
ASAMV006-06	CASENT0052053-D01	MA-02-09A-18	EF610692				Anochetus grandidieri	653	26-Feb-2002	MA-02-09A	California Academy of Sciences	Anochetus	Anochetus grandidieri	Brian Fisher	bfisher@calacademy.org	R. Harin'Hala	26-Feb-2002	Madagascar	Fianarantsoa		MA-02-09A	Vohiparara broken bridge, Fianarantsoa Prov.	-21.226	47.37	1110	malaise trap|high altitude rainforest|1m|BOX-0622|http://www.antweb.org/specimen.do?name=CASENT0052053-D01
JDWAM226-05	CASENT0052518-D01	BLF11688	EF610827				Anochetus madagascarensis	331	13-Dec-2004	Ambohimanga 250	California Academy of Sciences	Anochetus	Anochetus madagascarensis	Brian Fisher	bfisher@calacademy.org	B.L.Fisher	13-Dec-2004	Madagascar	Mahajanga		Ambohimanga 250	Foret Ambohimanga, 26.1 km 314° Mampikony	-15.963	47.438	250	EF13 ex rotten log|tropical dry forest|1w|BOX-0052|http://www.antweb.org/specimen.do?name=CASENT0052518-D01
ASAM3308-05	CASENT0053772-D02	BLF10960	EF610951				Odontomachus coquereli	617	23-Nov-2004	Marojejy 450	California Academy of Sciences	Odontomachus	Odontomachus coquereli	Brian Fisher	bfisher@calacademy.org	B.L.Fisher	23-Nov-2004	Madagascar	Antsiranana, Faritany d'		Marojejy 450	Parc National de Marojejy, Manantenina River, 28.0 km 38° NE Andapa, 8.2 km 333° NNW Manantenina	-14.437	49.775	450	EC13 ex rotten log|rainforest|1w|BOX-0588|http://www.antweb.org/specimen.do?name=CASENT0053772-D02
ASAM036-05	CASENT0053785-D02	BLF10849	EF610863	EU041992			Anochetus goodmani	655	17-Nov-2004	Antsahabe 550	California Academy of Sciences	Anochetus	Anochetus goodmani	Brian Fisher	bfisher@calacademy.org	B.L.Fisher	17-Nov-2004	Madagascar	Antsiranana, Faritany d'		Antsahabe 550	Foret d' Antsahabe, 11.4km 275° W Daraina	-13.212	49.557	550	EF13 ex rotten log|tropical dry forest|1w|BOX-0168|http://www.antweb.org/specimen.do?name=CASENT0053785-D02
ASAM033-05	CASENT0053810-D01	BLF10841	EF610855	EU041989		EU042013	Anochetus goodmani	656	17-Nov-2004	Antsahabe 550	California Academy of Sciences	Anochetus	Anochetus goodmani	Brian Fisher	bfisher@calacademy.org	B.L.Fisher	17-Nov-2004	Madagascar	Antsiranana, Faritany d'		Antsahabe 550	Foret d' Antsahabe, 11.4km 275° W Daraina	-13.212	49.557	550	EF11 under stone|tropical dry forest|1p|BOX-0168|http://www.antweb.org/specimen.do?name=CASENT0053810-D01
ASAM034-05	CASENT0053810-D02	BLF10841	EF610858	EU041990	EU042073		Anochetus goodmani	641	17-Nov-2004	Antsahabe 550	California Academy of Sciences	Anochetus	Anochetus goodmani	Brian Fisher	bfisher@calacademy.org	B.L.Fisher	17-Nov-2004	Madagascar	Antsiranana, Faritany d'		Antsahabe 550	Foret d' Antsahabe, 11.4km 275° W Daraina	-13.212	49.557	550	EF11 under stone|tropical dry forest|1p|BOX-0168|http://www.antweb.org/specimen.do?name=CASENT0053810-D02
ASAM032-05	CASENT0053814-D02	BLF10462	EF610852	EU041988	EU042070	EU042012	Anochetus goodmani	656	16-Nov-2004	Antsahabe 550	California Academy of Sciences	Anochetus	Anochetus goodmani	Brian Fisher	bfisher@calacademy.org	B.L.Fisher	16-Nov-2004	Madagascar	Antsiranana, Faritany d'		Antsahabe 550	Foret d' Antsahabe, 11.4km 275° W Daraina	-13.212	49.557	550	EF11 under stone|tropical dry forest|1w|BOX-0168|http://www.antweb.org/specimen.do?name=CASENT0053814-D02
ASAM3309-05	CASENT0053868-D02	BLF10968	EF610954				Odontomachus coquereli	611	23-Nov-2004	Marojejy 450	California Academy of Sciences	Odontomachus	Odontomachus coquereli	Brian Fisher	bfisher@calacademy.org	B.L.Fisher	23-Nov-2004	Madagascar	Antsiranana, Faritany d'		Marojejy 450	Parc National de Marojejy, Manantenina River, 28.0 km 38° NE Andapa, 8.2 km 333° NNW Manantenina	-14.437	49.775	450	EC13 ex rotten log|rainforest|1w|BOX-0588|http://www.antweb.org/specimen.do?name=CASENT0053868-D02
ASAM035-05	CASENT0053884-D02	BLF10845	EF610860	EU041991			Anochetus goodmani	657	17-Nov-2004	Antsahabe 550	California Academy of Sciences	Anochetus	Anochetus goodmani	Brian Fisher	bfisher@calacademy.org	B.L.Fisher	17-Nov-2004	Madagascar	Antsiranana, Faritany d'		Antsahabe 550	Foret d' Antsahabe, 11.4km 275° W Daraina	-13.212	49.557	550	EF11 under stone|tropical dry forest|1w|BOX-0168|http://www.antweb.org/specimen.do?name=CASENT0053884-D02
ASAM3319-05	CASENT0057008-D01	BLF08253	EF610942				Odontomachus coquereli	419	17-Mar-2003	Akirindro 600	California Academy of Sciences	Odontomachus	Odontomachus coquereli	Brian Fisher	bfisher@calacademy.org	Fisher, Griswold et al.	17-Mar-2003	Madagascar	Toamasina		Akirindro 600	Montagne d'Akirindro 7.6 km 341° NNW Ambinanitelo	-15.288	49.548	600	EC28 Malaise trap|rainforest|right hind leg of male|BOX-0588|http://www.antweb.org/specimen.do?name=CASENT0057008-D01
ASAM3325-05	CASENT0059728-D01	BLF12347	EF611020				Odontomachus troglodytes	657	06-Jun-2005	Vatovavy 175	California Academy of Sciences	Odontomachus	Odontomachus troglodytes	Brian Fisher	bfisher@calacademy.org	B.L.Fisher et al.	06-Jun-2005	Madagascar	Fianarantsoa		Vatovavy 175	7.6 km 122º Kianjavato, Foret Classee Vatovavy	-21.4	47.94	175	ex rotten log|rainforest|right hind leg of worker|BOX-0588|http://www.antweb.org/specimen.do?name=CASENT0059728-D01
ASAM3011-05	CASENT0059939-D01	BLF12302	EF610761				Anochetus madagascarensis	657	06-Jun-2005	Vatovavy 175	California Academy of Sciences	Anochetus	Anochetus madagascarensis	Brian Fisher	bfisher@calacademy.org	B.L.Fisher et al.	06-Jun-2005	Madagascar	Fianarantsoa		Vatovavy 175	7.6 km 122º Kianjavato, Foret Classee Vatovavy	-21.4	47.94	175	ex rotten stick on ground|rainforest|1w|BOX-0569|http://www.antweb.org/specimen.do?name=CASENT0059939-D01
ASAMF722-06	CASENT0059939-D02	BLF12302	EF610766				Anochetus madagascarensis	614	06-Jun-2005	Vatovavy 175	California Academy of Sciences	Anochetus	Anochetus madagascarensis	Brian Fisher	bfisher@calacademy.org	B.L.Fisher et al.	06-Jun-2005	Madagascar	Fianarantsoa		Vatovavy 175	7.6 km 122º Kianjavato, Foret Classee Vatovavy	-21.4	47.94	175	ex rotten stick on ground|rainforest|1w|BOX-0621|http://www.antweb.org/specimen.do?name=CASENT0059939-D02
ASAM3014-05	CASENT0060006-D01	BLF12322	EF610750				Anochetus madagascarensis	657	06-Jun-2005	Vatovavy 175	California Academy of Sciences	Anochetus	Anochetus madagascarensis	Brian Fisher	bfisher@calacademy.org	B.L.Fisher et al.	06-Jun-2005	Madagascar	Fianarantsoa		Vatovavy 175	7.6 km 122º Kianjavato, Foret Classee Vatovavy	-21.4	47.94	175	ex rotten log|rainforest|1w|BOX-0569|http://www.antweb.org/specimen.do?name=CASENT0060006-D01
ASAM3016-05	CASENT0060008-D01	BLF12303	EF610753				Anochetus madagascarensis	613	06-Jun-2005	Vatovavy 175	California Academy of Sciences	Anochetus	Anochetus madagascarensis	Brian Fisher	bfisher@calacademy.org	B.L.Fisher et al.	06-Jun-2005	Madagascar	Fianarantsoa		Vatovavy 175	7.6 km 122º Kianjavato, Foret Classee Vatovavy	-21.4	47.94	175	ex rotting tree stump|rainforest|1w|BOX-0569|http://www.antweb.org/specimen.do?name=CASENT0060008-D01
ASAMF724-06	CASENT0060008-D02	BLF12303	EF610769				Anochetus madagascarensis	642	06-Jun-2005	Vatovavy 175	California Academy of Sciences	Anochetus	Anochetus madagascarensis	Brian Fisher	bfisher@calacademy.org	B.L.Fisher et al.	06-Jun-2005	Madagascar	Fianarantsoa		Vatovavy 175	7.6 km 122º Kianjavato, Foret Classee Vatovavy	-21.4	47.94	175	ex rotting tree stump|rainforest|1w|BOX-0621|http://www.antweb.org/specimen.do?name=CASENT0060008-D02
ASAM3017-05	CASENT0060009-D01	BLF12380	EF610755				Anochetus madagascarensis	657	06-Jun-2005	Vatovavy 175	California Academy of Sciences	Anochetus	Anochetus madagascarensis	Brian Fisher	bfisher@calacademy.org	B.L.Fisher et al.	06-Jun-2005	Madagascar	Fianarantsoa		Vatovavy 175	7.6 km 122º Kianjavato, Foret Classee Vatovavy	-21.4	47.94	175	under rotten log|rainforest|1w|BOX-0569|http://www.antweb.org/specimen.do?name=CASENT0060009-D01
ASAMV024-06	CASENT0060009-D02	BLF12380	EF610805				Anochetus madagascarensis	656	06-Jun-2005	Vatovavy 175	California Academy of Sciences	Anochetus	Anochetus madagascarensis	Brian Fisher	bfisher@calacademy.org	B.L.Fisher et al.	06-Jun-2005	Madagascar	Fianarantsoa		Vatovavy 175	7.6 km 122º Kianjavato, Foret Classee Vatovavy	-21.4	47.94	175	under rotten log|rainforest|1w|BOX-0622|http://www.antweb.org/specimen.do?name=CASENT0060009-D02
ASAM3018-05	CASENT0060011-D01	BLF12359	EF610756				Anochetus madagascarensis	657	06-Jun-2005	Vatovavy 175	California Academy of Sciences	Anochetus	Anochetus madagascarensis	Brian Fisher	bfisher@calacademy.org	B.L.Fisher et al.	06-Jun-2005	Madagascar	Fianarantsoa		Vatovavy 175	7.6 km 122º Kianjavato, Foret Classee Vatovavy	-21.4	47.94	175	ex rotten log|rainforest|1w|BOX-0569|http://www.antweb.org/specimen.do?name=CASENT0060011-D01
ASAMV025-06	CASENT0060011-D02	BLF12359	EF610806				Anochetus madagascarensis	657	06-Jun-2005	Vatovavy 175	California Academy of Sciences	Anochetus	Anochetus madagascarensis	Brian Fisher	bfisher@calacademy.org	B.L.Fisher et al.	06-Jun-2005	Madagascar	Fianarantsoa		Vatovavy 175	7.6 km 122º Kianjavato, Foret Classee Vatovavy	-21.4	47.94	175	ex rotten log|rainforest|1w|BOX-0622|http://www.antweb.org/specimen.do?name=CASENT0060011-D02
ASAM3019-05	CASENT0060012-D01	BLF12359	EF610757				Anochetus madagascarensis	657	06-Jun-2005	Vatovavy 175	California Academy of Sciences	Anochetus	Anochetus madagascarensis	Brian Fisher	bfisher@calacademy.org	B.L.Fisher et al.	06-Jun-2005	Madagascar	Fianarantsoa		Vatovavy 175	7.6 km 122º Kianjavato, Foret Classee Vatovavy	-21.4	47.94	175	ex rotten log|rainforest|1w|BOX-0569|http://www.antweb.org/specimen.do?name=CASENT0060012-D01
ASAM3020-05	CASENT0060014-D01	BLF12343	EF610758				Anochetus madagascarensis	657	06-Jun-2005	Vatovavy 175	California Academy of Sciences	Anochetus	Anochetus madagascarensis	Brian Fisher	bfisher@calacademy.org	B.L.Fisher et al.	06-Jun-2005	Madagascar	Fianarantsoa		Vatovavy 175	7.6 km 122º Kianjavato, Foret Classee Vatovavy	-21.4	47.94	175	ex rotten log|rainforest|1w|BOX-0569|http://www.antweb.org/specimen.do?name=CASENT0060014-D01
ASAM3337-05	CASENT0060021-D01	BLF12402	EF611015				Odontomachus troglodytes	657	06-Jun-2005	Vatovavy 175	California Academy of Sciences	Odontomachus	Odontomachus troglodytes	Brian Fisher	bfisher@calacademy.org	B.L.Fisher et al.	06-Jun-2005	Madagascar	Fianarantsoa		Vatovavy 175	7.6 km 122º Kianjavato, Foret Classee Vatovavy	-21.4	47.94	175	ground nest|rainforest|1w|BOX-0570|http://www.antweb.org/specimen.do?name=CASENT0060021-D01
ASAM3338-05	CASENT0060021-D02	BLF12402	EF611017				Odontomachus troglodytes	606	06-Jun-2005	Vatovavy 175	California Academy of Sciences	Odontomachus	Odontomachus troglodytes	Brian Fisher	bfisher@calacademy.org	B.L.Fisher et al.	06-Jun-2005	Madagascar	Fianarantsoa		Vatovavy 175	7.6 km 122º Kianjavato, Foret Classee Vatovavy	-21.4	47.94	175	ground nest|rainforest|right hind leg of worker|BOX-0588|http://www.antweb.org/specimen.do?name=CASENT0060021-D02
ASAM3339-05	CASENT0060021-D03	BLF12402	EF611018				Odontomachus troglodytes	657	06-Jun-2005	Vatovavy 175	California Academy of Sciences	Odontomachus	Odontomachus troglodytes	Brian Fisher	bfisher@calacademy.org	B.L.Fisher et al.	06-Jun-2005	Madagascar	Fianarantsoa		Vatovavy 175	7.6 km 122º Kianjavato, Foret Classee Vatovavy	-21.4	47.94	175	ground nest|rainforest|1w|BOX-0588|http://www.antweb.org/specimen.do?name=CASENT0060021-D03
ASAM3037-05	CASENT0060045-D01	BLF12367	EF610759				Anochetus madagascarensis	657	06-Jun-2005	Vatovavy 175	California Academy of Sciences	Anochetus	Anochetus madagascarensis	Brian Fisher	bfisher@calacademy.org	B.L.Fisher et al.	06-Jun-2005	Madagascar	Fianarantsoa		Vatovavy 175	7.6 km 122º Kianjavato, Foret Classee Vatovavy	-21.4	47.94	175	ex rotten log|rainforest|1w|BOX-0569|http://www.antweb.org/specimen.do?name=CASENT0060045-D01
ASAMV026-06	CASENT0060045-D02	BLF12367	EF610807				Anochetus madagascarensis	529	06-Jun-2005	Vatovavy 175	California Academy of Sciences	Anochetus	Anochetus madagascarensis	Brian Fisher	bfisher@calacademy.org	B.L.Fisher et al.	06-Jun-2005	Madagascar	Fianarantsoa		Vatovavy 175	7.6 km 122º Kianjavato, Foret Classee Vatovavy	-21.4	47.94	175	ex rotten log|rainforest|1w|BOX-0622|http://www.antweb.org/specimen.do?name=CASENT0060045-D02
ASAM3044-05	CASENT0060162-D01	BLF12366	EF610749				Anochetus madagascarensis	657	06-Jun-2005	Vatovavy 175	California Academy of Sciences	Anochetus	Anochetus madagascarensis	Brian Fisher	bfisher@calacademy.org	B.L.Fisher et al.	06-Jun-2005	Madagascar	Fianarantsoa		Vatovavy 175	7.6 km 122º Kianjavato, Foret Classee Vatovavy	-21.4	47.94	175	ex rotting tree stump|rainforest|1w|BOX-0569|http://www.antweb.org/specimen.do?name=CASENT0060162-D01
ASAM3045-05	CASENT0060165-D01	BLF12319	EF610751				Anochetus madagascarensis	657	06-Jun-2005	Vatovavy 175	California Academy of Sciences	Anochetus	Anochetus madagascarensis	Brian Fisher	bfisher@calacademy.org	B.L.Fisher et al.	06-Jun-2005	Madagascar	Fianarantsoa		Vatovavy 175	7.6 km 122º Kianjavato, Foret Classee Vatovavy	-21.4	47.94	175	ex rotten log|rainforest|1w|BOX-0569|http://www.antweb.org/specimen.do?name=CASENT0060165-D01
ASAMF730-06	CASENT0060165-D02	BLF12319	EF610770				Anochetus madagascarensis	612	06-Jun-2005	Vatovavy 175	California Academy of Sciences	Anochetus	Anochetus madagascarensis	Brian Fisher	bfisher@calacademy.org	B.L.Fisher et al.	06-Jun-2005	Madagascar	Fianarantsoa		Vatovavy 175	7.6 km 122º Kianjavato, Foret Classee Vatovavy	-21.4	47.94	175	ex rotten log|rainforest|1w|BOX-0621|http://www.antweb.org/specimen.do?name=CASENT0060165-D02
ASAM3047-05	CASENT0060171-D01	BLF12350	EF610754				Anochetus madagascarensis	657	06-Jun-2005	Vatovavy 175	California Academy of Sciences	Anochetus	Anochetus madagascarensis	Brian Fisher	bfisher@calacademy.org	B.L.Fisher et al.	06-Jun-2005	Madagascar	Fianarantsoa		Vatovavy 175	7.6 km 122º Kianjavato, Foret Classee Vatovavy	-21.4	47.94	175	ex rotten log|rainforest|1w|BOX-0569|http://www.antweb.org/specimen.do?name=CASENT0060171-D01
ASAM3049-05	CASENT0060180-D01	BLF12360	EF610629				Anochetus grandidieri	654	06-Jun-2005	Vatovavy 175	California Academy of Sciences	Anochetus	Anochetus grandidieri	Brian Fisher	bfisher@calacademy.org	B.L.Fisher et al.	06-Jun-2005	Madagascar	Fianarantsoa		Vatovavy 175	7.6 km 122º Kianjavato, Foret Classee Vatovavy	-21.4	47.94	175	ex rotten stick on ground|rainforest|1w|BOX-0569|http://www.antweb.org/specimen.do?name=CASENT0060180-D01
ASAM3053-05	CASENT0060292-D01	BLF12336	EF610760				Anochetus madagascarensis	657	06-Jun-2005	Vatovavy 175	California Academy of Sciences	Anochetus	Anochetus madagascarensis	Brian Fisher	bfisher@calacademy.org	B.L.Fisher et al.	06-Jun-2005	Madagascar	Fianarantsoa		Vatovavy 175	7.6 km 122º Kianjavato, Foret Classee Vatovavy	-21.4	47.94	175	ex rotten log|rainforest|1w|BOX-0569|http://www.antweb.org/specimen.do?name=CASENT0060292-D01
ASAMF731-06	CASENT0060292-D02	BLF12336	EF610772				Anochetus madagascarensis	611	06-Jun-2005	Vatovavy 175	California Academy of Sciences	Anochetus	Anochetus madagascarensis	Brian Fisher	bfisher@calacademy.org	B.L.Fisher et al.	06-Jun-2005	Madagascar	Fianarantsoa		Vatovavy 175	7.6 km 122º Kianjavato, Foret Classee Vatovavy	-21.4	47.94	175	ex rotten log|rainforest|1w|BOX-0621|http://www.antweb.org/specimen.do?name=CASENT0060292-D02
ASAM3076-05	CASENT0060493-D01	BLF12311	EF610752				Anochetus madagascarensis	657	06-Jun-2005	Vatovavy 175	California Academy of Sciences	Anochetus	Anochetus madagascarensis	Brian Fisher	bfisher@calacademy.org	B.L.Fisher et al.	06-Jun-2005	Madagascar	Fianarantsoa		Vatovavy 175	7.6 km 122º Kianjavato, Foret Classee Vatovavy	-21.4	47.94	175	ex rotten log|rainforest|1w|BOX-0569|http://www.antweb.org/specimen.do?name=CASENT0060493-D01
ASAMF732-06	CASENT0060493-D02	BLF12311	EF610773				Anochetus madagascarensis	634	06-Jun-2005	Vatovavy 175	California Academy of Sciences	Anochetus	Anochetus madagascarensis	Brian Fisher	bfisher@calacademy.org	B.L.Fisher et al.	06-Jun-2005	Madagascar	Fianarantsoa		Vatovavy 175	7.6 km 122º Kianjavato, Foret Classee Vatovavy	-21.4	47.94	175	ex rotten log|rainforest|1w|BOX-0621|http://www.antweb.org/specimen.do?name=CASENT0060493-D02
ASAMF733-06	CASENT0060755-D01	BLF12296	EF610631				Anochetus grandidieri	657	06-Jun-2005	Vatovavy 175	California Academy of Sciences	Anochetus	Anochetus grandidieri	Brian Fisher	bfisher@calacademy.org	B.L.Fisher et al.	06-Jun-2005	Madagascar	Fianarantsoa		Vatovavy 175	7.6 km 122º Kianjavato, Foret Classee Vatovavy	-21.4	47.94	175	sifted litter (leaf mold, rotten wood)|rainforest|1w|BOX-0620|http://www.antweb.org/specimen.do?name=CASENT0060755-D01
ASAMF734-06	CASENT0060756-D01	BLF12296	EF610634				Anochetus grandidieri	657	06-Jun-2005	Vatovavy 175	California Academy of Sciences	Anochetus	Anochetus grandidieri	Brian Fisher	bfisher@calacademy.org	B.L.Fisher et al.	06-Jun-2005	Madagascar	Fianarantsoa		Vatovavy 175	7.6 km 122º Kianjavato, Foret Classee Vatovavy	-21.4	47.94	175	sifted litter (leaf mold, rotten wood)|rainforest|1w|BOX-0620|http://www.antweb.org/specimen.do?name=CASENT0060756-D01
ASAMF735-06	CASENT0060757-D01	BLF12296	EF610638				Anochetus grandidieri	657	06-Jun-2005	Vatovavy 175	California Academy of Sciences	Anochetus	Anochetus grandidieri	Brian Fisher	bfisher@calacademy.org	B.L.Fisher et al.	06-Jun-2005	Madagascar	Fianarantsoa		Vatovavy 175	7.6 km 122º Kianjavato, Foret Classee Vatovavy	-21.4	47.94	175	sifted litter (leaf mold, rotten wood)|rainforest|1w|BOX-0620|http://www.antweb.org/specimen.do?name=CASENT0060757-D01
ASAMF736-06	CASENT0060758-D01	BLF12296	EF610641				Anochetus grandidieri	657	06-Jun-2005	Vatovavy 175	California Academy of Sciences	Anochetus	Anochetus grandidieri	Brian Fisher	bfisher@calacademy.org	B.L.Fisher et al.	06-Jun-2005	Madagascar	Fianarantsoa		Vatovavy 175	7.6 km 122º Kianjavato, Foret Classee Vatovavy	-21.4	47.94	175	sifted litter (leaf mold, rotten wood)|rainforest|1w|BOX-0620|http://www.antweb.org/specimen.do?name=CASENT0060758-D01
ASAMF737-06	CASENT0060864-D01	BLF12186	EF610644				Anochetus grandidieri	657	03-Jun-2005	Andrambovato 1075	California Academy of Sciences	Anochetus	Anochetus grandidieri	Brian Fisher	bfisher@calacademy.org	B.L.Fisher et al.	03-Jun-2005	Madagascar	Fianarantsoa		Andrambovato 1075	2km W Andrambovato, along river Tatamaly	-21.512	47.41	1075	ex rotten log|montane rainforest|1w|BOX-0620|http://www.antweb.org/specimen.do?name=CASENT0060864-D01
ASAMF738-06	CASENT0060867-D01	BLF12238	EF610646				Anochetus grandidieri	657	03-Jun-2005	Andrambovato 1075	California Academy of Sciences	Anochetus	Anochetus grandidieri	Brian Fisher	bfisher@calacademy.org	B.L.Fisher et al.	03-Jun-2005	Madagascar	Fianarantsoa		Andrambovato 1075	2km W Andrambovato, along river Tatamaly	-21.512	47.41	1075	ex rotten log|montane rainforest|1w|BOX-0620|http://www.antweb.org/specimen.do?name=CASENT0060867-D01
ASAMF739-06	CASENT0060909-D01	BLF12296	EF610647				Anochetus grandidieri	657	06-Jun-2005	Vatovavy 175	California Academy of Sciences	Anochetus	Anochetus grandidieri	Brian Fisher	bfisher@calacademy.org	B.L.Fisher et al.	06-Jun-2005	Madagascar	Fianarantsoa		Vatovavy 175	7.6 km 122º Kianjavato, Foret Classee Vatovavy	-21.4	47.94	175	sifted litter (leaf mold, rotten wood)|rainforest|1w|BOX-0620|http://www.antweb.org/specimen.do?name=CASENT0060909-D01
ASAMF740-06	CASENT0060913-D01	BLF12164	EF610649				Anochetus grandidieri	657	03-Jun-2005	Andrambovato 1075	California Academy of Sciences	Anochetus	Anochetus grandidieri	Brian Fisher	bfisher@calacademy.org	B.L.Fisher et al.	03-Jun-2005	Madagascar	Fianarantsoa		Andrambovato 1075	2km W Andrambovato, along river Tatamaly	-21.512	47.41	1075	sifted litter (leaf mold, rotten wood)|montane rainforest|1w|BOX-0620|http://www.antweb.org/specimen.do?name=CASENT0060913-D01
ASAMF741-06	CASENT0060986-D01	BLF12296	EF610651				Anochetus grandidieri	657	06-Jun-2005	Vatovavy 175	California Academy of Sciences	Anochetus	Anochetus grandidieri	Brian Fisher	bfisher@calacademy.org	B.L.Fisher et al.	06-Jun-2005	Madagascar	Fianarantsoa		Vatovavy 175	7.6 km 122º Kianjavato, Foret Classee Vatovavy	-21.4	47.94	175	sifted litter (leaf mold, rotten wood)|rainforest|1w|BOX-0620|http://www.antweb.org/specimen.do?name=CASENT0060986-D01
ASAMF742-06	CASENT0060987-D01	BLF12296	EF610653				Anochetus grandidieri	656	06-Jun-2005	Vatovavy 175	California Academy of Sciences	Anochetus	Anochetus grandidieri	Brian Fisher	bfisher@calacademy.org	B.L.Fisher et al.	06-Jun-2005	Madagascar	Fianarantsoa		Vatovavy 175	7.6 km 122º Kianjavato, Foret Classee Vatovavy	-21.4	47.94	175	sifted litter (leaf mold, rotten wood)|rainforest|1w|BOX-0620|http://www.antweb.org/specimen.do?name=CASENT0060987-D01
ASAMF743-06	CASENT0060988-D01	BLF12296	EF610655				Anochetus grandidieri	657	06-Jun-2005	Vatovavy 175	California Academy of Sciences	Anochetus	Anochetus grandidieri	Brian Fisher	bfisher@calacademy.org	B.L.Fisher et al.	06-Jun-2005	Madagascar	Fianarantsoa		Vatovavy 175	7.6 km 122º Kianjavato, Foret Classee Vatovavy	-21.4	47.94	175	sifted litter (leaf mold, rotten wood)|rainforest|1w|BOX-0620|http://www.antweb.org/specimen.do?name=CASENT0060988-D01
ASAMF744-06	CASENT0060989-D01	BLF12296	EF610658				Anochetus grandidieri	657	06-Jun-2005	Vatovavy 175	California Academy of Sciences	Anochetus	Anochetus grandidieri	Brian Fisher	bfisher@calacademy.org	B.L.Fisher et al.	06-Jun-2005	Madagascar	Fianarantsoa		Vatovavy 175	7.6 km 122º Kianjavato, Foret Classee Vatovavy	-21.4	47.94	175	sifted litter (leaf mold, rotten wood)|rainforest|1w|BOX-0620|http://www.antweb.org/specimen.do?name=CASENT0060989-D01
ASAMF745-06	CASENT0060990-D01	BLF12296	EF610660				Anochetus grandidieri	657	06-Jun-2005	Vatovavy 175	California Academy of Sciences	Anochetus	Anochetus grandidieri	Brian Fisher	bfisher@calacademy.org	B.L.Fisher et al.	06-Jun-2005	Madagascar	Fianarantsoa		Vatovavy 175	7.6 km 122º Kianjavato, Foret Classee Vatovavy	-21.4	47.94	175	sifted litter (leaf mold, rotten wood)|rainforest|1w|BOX-0620|http://www.antweb.org/specimen.do?name=CASENT0060990-D01
ASAMF746-06	CASENT0061064-D01	BLF12296	EF610662				Anochetus grandidieri	657	06-Jun-2005	Vatovavy 175	California Academy of Sciences	Anochetus	Anochetus grandidieri	Brian Fisher	bfisher@calacademy.org	B.L.Fisher et al.	06-Jun-2005	Madagascar	Fianarantsoa		Vatovavy 175	7.6 km 122º Kianjavato, Foret Classee Vatovavy	-21.4	47.94	175	sifted litter (leaf mold, rotten wood)|rainforest|1w|BOX-0620|http://www.antweb.org/specimen.do?name=CASENT0061064-D01
ASAMF747-06	CASENT0061065-D01	BLF12296	EF610664				Anochetus grandidieri	657	06-Jun-2005	Vatovavy 175	California Academy of Sciences	Anochetus	Anochetus grandidieri	Brian Fisher	bfisher@calacademy.org	B.L.Fisher et al.	06-Jun-2005	Madagascar	Fianarantsoa		Vatovavy 175	7.6 km 122º Kianjavato, Foret Classee Vatovavy	-21.4	47.94	175	sifted litter (leaf mold, rotten wood)|rainforest|1w|BOX-0620|http://www.antweb.org/specimen.do?name=CASENT0061065-D01
ASAMF748-06	CASENT0061066-D01	BLF12296	EF610630				Anochetus grandidieri	657	06-Jun-2005	Vatovavy 175	California Academy of Sciences	Anochetus	Anochetus grandidieri	Brian Fisher	bfisher@calacademy.org	B.L.Fisher et al.	06-Jun-2005	Madagascar	Fianarantsoa		Vatovavy 175	7.6 km 122º Kianjavato, Foret Classee Vatovavy	-21.4	47.94	175	sifted litter (leaf mold, rotten wood)|rainforest|1w|BOX-0620|http://www.antweb.org/specimen.do?name=CASENT0061066-D01
ASAMF749-06	CASENT0061067-D01	BLF12296	EF610762				Anochetus madagascarensis	657	06-Jun-2005	Vatovavy 175	California Academy of Sciences	Anochetus	Anochetus madagascarensis	Brian Fisher	bfisher@calacademy.org	B.L.Fisher et al.	06-Jun-2005	Madagascar	Fianarantsoa		Vatovavy 175	7.6 km 122º Kianjavato, Foret Classee Vatovavy	-21.4	47.94	175	sifted litter (leaf mold, rotten wood)|rainforest|1w|BOX-0620|http://www.antweb.org/specimen.do?name=CASENT0061067-D01
ASAMF750-06	CASENT0061110-D01	BLF12296	EF610764				Anochetus madagascarensis	657	06-Jun-2005	Vatovavy 175	California Academy of Sciences	Anochetus	Anochetus madagascarensis	Brian Fisher	bfisher@calacademy.org	B.L.Fisher et al.	06-Jun-2005	Madagascar	Fianarantsoa		Vatovavy 175	7.6 km 122º Kianjavato, Foret Classee Vatovavy	-21.4	47.94	175	sifted litter (leaf mold, rotten wood)|rainforest|1w|BOX-0620|http://www.antweb.org/specimen.do?name=CASENT0061110-D01
ASAMF751-06	CASENT0061111-D01	BLF12296	EF610643				Anochetus grandidieri	657	06-Jun-2005	Vatovavy 175	California Academy of Sciences	Anochetus	Anochetus grandidieri	Brian Fisher	bfisher@calacademy.org	B.L.Fisher et al.	06-Jun-2005	Madagascar	Fianarantsoa		Vatovavy 175	7.6 km 122º Kianjavato, Foret Classee Vatovavy	-21.4	47.94	175	sifted litter (leaf mold, rotten wood)|rainforest|1w|BOX-0620|http://www.antweb.org/specimen.do?name=CASENT0061111-D01
ASAMF752-06	CASENT0061112-D01	BLF12296	EF610645				Anochetus grandidieri	657	06-Jun-2005	Vatovavy 175	California Academy of Sciences	Anochetus	Anochetus grandidieri	Brian Fisher	bfisher@calacademy.org	B.L.Fisher et al.	06-Jun-2005	Madagascar	Fianarantsoa		Vatovavy 175	7.6 km 122º Kianjavato, Foret Classee Vatovavy	-21.4	47.94	175	sifted litter (leaf mold, rotten wood)|rainforest|1w|BOX-0620|http://www.antweb.org/specimen.do?name=CASENT0061112-D01
ASAMF753-06	CASENT0061156-D01	BLF12296	EF610768				Anochetus madagascarensis	657	06-Jun-2005	Vatovavy 175	California Academy of Sciences	Anochetus	Anochetus madagascarensis	Brian Fisher	bfisher@calacademy.org	B.L.Fisher et al.	06-Jun-2005	Madagascar	Fianarantsoa		Vatovavy 175	7.6 km 122º Kianjavato, Foret Classee Vatovavy	-21.4	47.94	175	sifted litter (leaf mold, rotten wood)|rainforest|1w|BOX-0620|http://www.antweb.org/specimen.do?name=CASENT0061156-D01
ASAMF754-06	CASENT0061157-D01	BLF12296	EF610648				Anochetus grandidieri	657	06-Jun-2005	Vatovavy 175	California Academy of Sciences	Anochetus	Anochetus grandidieri	Brian Fisher	bfisher@calacademy.org	B.L.Fisher et al.	06-Jun-2005	Madagascar	Fianarantsoa		Vatovavy 175	7.6 km 122º Kianjavato, Foret Classee Vatovavy	-21.4	47.94	175	sifted litter (leaf mold, rotten wood)|rainforest|1w|BOX-0620|http://www.antweb.org/specimen.do?name=CASENT0061157-D01
ASAMF755-06	CASENT0061158-D01	BLF12296	EF610650				Anochetus grandidieri	657	06-Jun-2005	Vatovavy 175	California Academy of Sciences	Anochetus	Anochetus grandidieri	Brian Fisher	bfisher@calacademy.org	B.L.Fisher et al.	06-Jun-2005	Madagascar	Fianarantsoa		Vatovavy 175	7.6 km 122º Kianjavato, Foret Classee Vatovavy	-21.4	47.94	175	sifted litter (leaf mold, rotten wood)|rainforest|1w|BOX-0620|http://www.antweb.org/specimen.do?name=CASENT0061158-D01
ASAMF756-06	CASENT0061159-D01	BLF12296	EF610652				Anochetus grandidieri	657	06-Jun-2005	Vatovavy 175	California Academy of Sciences	Anochetus	Anochetus grandidieri	Brian Fisher	bfisher@calacademy.org	B.L.Fisher et al.	06-Jun-2005	Madagascar	Fianarantsoa		Vatovavy 175	7.6 km 122º Kianjavato, Foret Classee Vatovavy	-21.4	47.94	175	sifted litter (leaf mold, rotten wood)|rainforest|1w|BOX-0620|http://www.antweb.org/specimen.do?name=CASENT0061159-D01
ASAMF758-06	CASENT0061274-D01	BLF12164	EF610657				Anochetus grandidieri	657	03-Jun-2005	Andrambovato 1075	California Academy of Sciences	Anochetus	Anochetus grandidieri	Brian Fisher	bfisher@calacademy.org	B.L.Fisher et al.	03-Jun-2005	Madagascar	Fianarantsoa		Andrambovato 1075	2km W Andrambovato, along river Tatamaly	-21.512	47.41	1075	sifted litter (leaf mold, rotten wood)|montane rainforest|1w|BOX-0620|http://www.antweb.org/specimen.do?name=CASENT0061274-D01
ASAMF759-06	CASENT0061294-D01	BLF12296	EF610659				Anochetus grandidieri	657	06-Jun-2005	Vatovavy 175	California Academy of Sciences	Anochetus	Anochetus grandidieri	Brian Fisher	bfisher@calacademy.org	B.L.Fisher et al.	06-Jun-2005	Madagascar	Fianarantsoa		Vatovavy 175	7.6 km 122º Kianjavato, Foret Classee Vatovavy	-21.4	47.94	175	sifted litter (leaf mold, rotten wood)|rainforest|1w|BOX-0620|http://www.antweb.org/specimen.do?name=CASENT0061294-D01
ASAMF760-06	CASENT0061295-D01	BLF12296	EF610661				Anochetus grandidieri	657	06-Jun-2005	Vatovavy 175	California Academy of Sciences	Anochetus	Anochetus grandidieri	Brian Fisher	bfisher@calacademy.org	B.L.Fisher et al.	06-Jun-2005	Madagascar	Fianarantsoa		Vatovavy 175	7.6 km 122º Kianjavato, Foret Classee Vatovavy	-21.4	47.94	175	sifted litter (leaf mold, rotten wood)|rainforest|1w|BOX-0620|http://www.antweb.org/specimen.do?name=CASENT0061295-D01
ASAMF761-06	CASENT0061296-D01	BLF12296	EF610663				Anochetus grandidieri	657	06-Jun-2005	Vatovavy 175	California Academy of Sciences	Anochetus	Anochetus grandidieri	Brian Fisher	bfisher@calacademy.org	B.L.Fisher et al.	06-Jun-2005	Madagascar	Fianarantsoa		Vatovavy 175	7.6 km 122º Kianjavato, Foret Classee Vatovavy	-21.4	47.94	175	sifted litter (leaf mold, rotten wood)|rainforest|1w|BOX-0620|http://www.antweb.org/specimen.do?name=CASENT0061296-D01
ASAMF762-06	CASENT0061337-D01	BLF12164	EF610666				Anochetus grandidieri	657	03-Jun-2005	Andrambovato 1075	California Academy of Sciences	Anochetus	Anochetus grandidieri	Brian Fisher	bfisher@calacademy.org	B.L.Fisher et al.	03-Jun-2005	Madagascar	Fianarantsoa		Andrambovato 1075	2km W Andrambovato, along river Tatamaly	-21.512	47.41	1075	sifted litter (leaf mold, rotten wood)|montane rainforest|1w|BOX-0620|http://www.antweb.org/specimen.do?name=CASENT0061337-D01
ASAMF763-06	CASENT0061448-D01	BLF12164	EF610633				Anochetus grandidieri	657	03-Jun-2005	Andrambovato 1075	California Academy of Sciences	Anochetus	Anochetus grandidieri	Brian Fisher	bfisher@calacademy.org	B.L.Fisher et al.	03-Jun-2005	Madagascar	Fianarantsoa		Andrambovato 1075	2km W Andrambovato, along river Tatamaly	-21.512	47.41	1075	sifted litter (leaf mold, rotten wood)|montane rainforest|1w|BOX-0620|http://www.antweb.org/specimen.do?name=CASENT0061448-D01
ASAMF764-06	CASENT0061487-D01	BLF12164	EF610637				Anochetus grandidieri	657	03-Jun-2005	Andrambovato 1075	California Academy of Sciences	Anochetus	Anochetus grandidieri	Brian Fisher	bfisher@calacademy.org	B.L.Fisher et al.	03-Jun-2005	Madagascar	Fianarantsoa		Andrambovato 1075	2km W Andrambovato, along river Tatamaly	-21.512	47.41	1075	sifted litter (leaf mold, rotten wood)|montane rainforest|1w|BOX-0620|http://www.antweb.org/specimen.do?name=CASENT0061487-D01
ASAMX291-06	CASENT0064429-D01	MG-31-20	EF610895				Anochetus boltoni	603	28-Apr-2005	Marojejy 488	California Academy of Sciences	Anochetus	Anochetus boltoni	Brian Fisher	bfisher@calacademy.org	Rin'Ha, Irwin	28-Apr-2005	Madagascar	Antsiranana, Faritany d'		Marojejy 488	Parc National Marojejy	-14.438	49.774	488	Malaise|rainforest|right hind leg of male|BOX-1233|http://www.antweb.org/specimen.do?name=CASENT0064429-D01
ASAMF773-06	CASENT0066509-D01	BLF12849	EF611034				Odontomachus troglodytes	657	21-Nov-2005	Ambohidena 20	California Academy of Sciences	Odontomachus	Odontomachus troglodytes	Brian Fisher	bfisher@calacademy.org	B.L.Fisher et al.	21-Nov-2005	Madagascar	Toamasina		Ambohidena 20	Ile Sainte Marie, Foret Ambohidena, 22.8 km 44° Ambodifotatra	-16.824	49.964	20	ex rotten log|coastal scrub|1w|BOX-0620|http://www.antweb.org/specimen.do?name=CASENT0066509-D01
ASAMF779-06	CASENT0066816-D01	BLF12495	EF610636				Anochetus grandidieri	657	13-Nov-2005	Mandrisy	California Academy of Sciences	Anochetus	Anochetus grandidieri	Brian Fisher	bfisher@calacademy.org	B.L.Fisher et al.	13-Nov-2005	Madagascar	Toamasina		Mandrisy	Foret d'Analava Mandrisy, 5.9 km 195ºAntanambe	-16.486	49.847	10	ex rotten log|littoral rainforest|1w|BOX-0620|http://www.antweb.org/specimen.do?name=CASENT0066816-D01
ASAMF780-06	CASENT0066817-D01	BLF12538	EF610640				Anochetus grandidieri	657	13-Nov-2005	Mandrisy	California Academy of Sciences	Anochetus	Anochetus grandidieri	Brian Fisher	bfisher@calacademy.org	B.L.Fisher et al.	13-Nov-2005	Madagascar	Toamasina		Mandrisy	Foret d'Analava Mandrisy, 5.9 km 195ºAntanambe	-16.486	49.847	10	ex leaf above ground|littoral rainforest|1w|BOX-0620|http://www.antweb.org/specimen.do?name=CASENT0066817-D01
ASAMF781-06	CASENT0066818-D01	BLF12461	EF611026				Odontomachus troglodytes	657	13-Nov-2005	Mandrisy	California Academy of Sciences	Odontomachus	Odontomachus troglodytes	Brian Fisher	bfisher@calacademy.org	B.L.Fisher et al.	13-Nov-2005	Madagascar	Toamasina		Mandrisy	Foret d'Analava Mandrisy, 5.9 km 195ºAntanambe	-16.486	49.847	10	under log in sandy soil|coastal scrub|1w|BOX-0620|http://www.antweb.org/specimen.do?name=CASENT0066818-D01
ASAMF782-06	CASENT0066819-D01	BLF12503	EF611027				Odontomachus troglodytes	657	13-Nov-2005	Mandrisy	California Academy of Sciences	Odontomachus	Odontomachus troglodytes	Brian Fisher	bfisher@calacademy.org	B.L.Fisher et al.	13-Nov-2005	Madagascar	Toamasina		Mandrisy	Foret d'Analava Mandrisy, 5.9 km 195ºAntanambe	-16.486	49.847	10	ex rotten log|littoral rainforest|1w|BOX-0620|http://www.antweb.org/specimen.do?name=CASENT0066819-D01
ASAMF784-06	CASENT0066820-D01	BLF12516	EF611028				Odontomachus troglodytes	657	13-Nov-2005	Mandrisy	California Academy of Sciences	Odontomachus	Odontomachus troglodytes	Brian Fisher	bfisher@calacademy.org	B.L.Fisher et al.	13-Nov-2005	Madagascar	Toamasina		Mandrisy	Foret d'Analava Mandrisy, 5.9 km 195ºAntanambe	-16.486	49.847	10	ex rotten log|littoral rainforest|1w|BOX-0620|http://www.antweb.org/specimen.do?name=CASENT0066820-D01
ASAMF785-06	CASENT0066820-D02	BLF12516	EF611030				Odontomachus troglodytes	657	13-Nov-2005	Mandrisy	California Academy of Sciences	Odontomachus	Odontomachus troglodytes	Brian Fisher	bfisher@calacademy.org	B.L.Fisher et al.	13-Nov-2005	Madagascar	Toamasina		Mandrisy	Foret d'Analava Mandrisy, 5.9 km 195ºAntanambe	-16.486	49.847	10	ex rotten log|littoral rainforest|1l|BOX-0620|http://www.antweb.org/specimen.do?name=CASENT0066820-D02
ASAMF786-06	CASENT0066821-D01	BLF12519	EF611032				Odontomachus troglodytes	657	13-Nov-2005	Mandrisy	California Academy of Sciences	Odontomachus	Odontomachus troglodytes	Brian Fisher	bfisher@calacademy.org	B.L.Fisher et al.	13-Nov-2005	Madagascar	Toamasina		Mandrisy	Foret d'Analava Mandrisy, 5.9 km 195ºAntanambe	-16.486	49.847	10	ex rotten log|littoral rainforest|1w|BOX-0620|http://www.antweb.org/specimen.do?name=CASENT0066821-D01
ASAMF787-06	CASENT0066822-D01	BLF12494	EF610654				Anochetus grandidieri	657	13-Nov-2005	Mandrisy	California Academy of Sciences	Anochetus	Anochetus grandidieri	Brian Fisher	bfisher@calacademy.org	B.L.Fisher et al.	13-Nov-2005	Madagascar	Toamasina		Mandrisy	Foret d'Analava Mandrisy, 5.9 km 195ºAntanambe	-16.486	49.847	10	ex rotten log|littoral rainforest|1w|BOX-0620|http://www.antweb.org/specimen.do?name=CASENT0066822-D01
ASAMF788-06	CASENT0066822-D02	BLF12494	EF610656				Anochetus grandidieri	657	13-Nov-2005	Mandrisy	California Academy of Sciences	Anochetus	Anochetus grandidieri	Brian Fisher	bfisher@calacademy.org	B.L.Fisher et al.	13-Nov-2005	Madagascar	Toamasina		Mandrisy	Foret d'Analava Mandrisy, 5.9 km 195ºAntanambe	-16.486	49.847	10	ex rotten log|littoral rainforest|1l|BOX-0620|http://www.antweb.org/specimen.do?name=CASENT0066822-D02
ASAMF789-06	CASENT0066824-D01	BLF12554	EF611036				Odontomachus troglodytes	657	13-Nov-2005	Mandrisy	California Academy of Sciences	Odontomachus	Odontomachus troglodytes	Brian Fisher	bfisher@calacademy.org	B.L.Fisher et al.	13-Nov-2005	Madagascar	Toamasina		Mandrisy	Foret d'Analava Mandrisy, 5.9 km 195ºAntanambe	-16.486	49.847	10	ground forager(s)|littoral rainforest|1w|BOX-0620|http://www.antweb.org/specimen.do?name=CASENT0066824-D01
ASAMF790-06	CASENT0066826-D01	BLF12721	EF610771				Anochetus madagascarensis	657	18-Nov-2005	Ambodiriana 125	California Academy of Sciences	Anochetus	Anochetus madagascarensis	Brian Fisher	bfisher@calacademy.org	B.L.Fisher et al.	18-Nov-2005	Madagascar	Toamasina		Ambodiriana 125	Res. Ambodiriana, 4.8 km 306°Manompana, along Manompana river	-16.672	49.701	125	ground forager(s)|rainforest|1w|BOX-0620|http://www.antweb.org/specimen.do?name=CASENT0066826-D01
ASAMF791-06	CASENT0066827-D01	BLF12760	EF611038				Odontomachus troglodytes	657	18-Nov-2005	Ambodiriana 125	California Academy of Sciences	Odontomachus	Odontomachus troglodytes	Brian Fisher	bfisher@calacademy.org	B.L.Fisher et al.	18-Nov-2005	Madagascar	Toamasina		Ambodiriana 125	Res. Ambodiriana, 4.8 km 306°Manompana, along Manompana river	-16.672	49.701	125	ex rotten log|rainforest|1w|BOX-0620|http://www.antweb.org/specimen.do?name=CASENT0066827-D01
ASAMF794-06	CASENT0066831-D01	BLF12571	EF610635				Anochetus grandidieri	657	15-Nov-2005	Mananara-Nord 225	California Academy of Sciences	Anochetus	Anochetus grandidieri	Brian Fisher	bfisher@calacademy.org	B.L.Fisher et al.	15-Nov-2005	Madagascar	Toamasina		Mananara-Nord 225	Parc National Mananara-Nord, 7.1 km 261° Antanambe	-16.455	49.788	225	under moss on rotten log on ground|rainforest|1w|BOX-0620|http://www.antweb.org/specimen.do?name=CASENT0066831-D01
ASAMF795-06	CASENT0066832-D01	BLF12577	EF610639				Anochetus grandidieri	657	15-Nov-2005	Mananara-Nord 225	California Academy of Sciences	Anochetus	Anochetus grandidieri	Brian Fisher	bfisher@calacademy.org	B.L.Fisher et al.	15-Nov-2005	Madagascar	Toamasina		Mananara-Nord 225	Parc National Mananara-Nord, 7.1 km 261° Antanambe	-16.455	49.788	225	ex rotten log|rainforest|1w|BOX-0620|http://www.antweb.org/specimen.do?name=CASENT0066832-D01
ASAMF796-06	CASENT0066833-D01	BLF12613	EF610642				Anochetus grandidieri	657	15-Nov-2005	Mananara-Nord 225	California Academy of Sciences	Anochetus	Anochetus grandidieri	Brian Fisher	bfisher@calacademy.org	B.L.Fisher et al.	15-Nov-2005	Madagascar	Toamasina		Mananara-Nord 225	Parc National Mananara-Nord, 7.1 km 261° Antanambe	-16.455	49.788	225	ex rotten log|rainforest|1w|BOX-0620|http://www.antweb.org/specimen.do?name=CASENT0066833-D01
ASAMF798-06	CASENT0066835-D01	BLF12994	EF610983				Odontomachus coquereli	657	24-Nov-2005	Kalalao 100	California Academy of Sciences	Odontomachus	Odontomachus coquereli	Brian Fisher	bfisher@calacademy.org	B.L.Fisher et al.	24-Nov-2005	Madagascar	Toamasina		Kalalao 100	Ile Sainte Marie, Foret Kalalao, 9.9 km 34° Ambodifotatra	-16.922	49.887	100	ex rotten log|rainforest|1w|BOX-0620|http://www.antweb.org/specimen.do?name=CASENT0066835-D01
ASAMF799-06	CASENT0066835-D02	BLF12994	EF610985				Odontomachus coquereli	657	24-Nov-2005	Kalalao 100	California Academy of Sciences	Odontomachus	Odontomachus coquereli	Brian Fisher	bfisher@calacademy.org	B.L.Fisher et al.	24-Nov-2005	Madagascar	Toamasina		Kalalao 100	Ile Sainte Marie, Foret Kalalao, 9.9 km 34° Ambodifotatra	-16.922	49.887	100	ex rotten log|rainforest|1l|BOX-0620|http://www.antweb.org/specimen.do?name=CASENT0066835-D02
ASAMF800-06	CASENT0066836-D01	BLF12997	EF611029				Odontomachus troglodytes	657	24-Nov-2005	Kalalao 100	California Academy of Sciences	Odontomachus	Odontomachus troglodytes	Brian Fisher	bfisher@calacademy.org	B.L.Fisher et al.	24-Nov-2005	Madagascar	Toamasina		Kalalao 100	Ile Sainte Marie, Foret Kalalao, 9.9 km 34° Ambodifotatra	-16.922	49.887	100	ex rotten log|rainforest|1w|BOX-0620|http://www.antweb.org/specimen.do?name=CASENT0066836-D01
ASAMF801-06	CASENT0066837-D01	BLF13039	EF611031				Odontomachus troglodytes	657	26-Nov-2005	Kalalao 100	California Academy of Sciences	Odontomachus	Odontomachus troglodytes	Brian Fisher	bfisher@calacademy.org	B.L.Fisher et al.	26-Nov-2005	Madagascar	Toamasina		Kalalao 100	Ile Sainte Marie, Foret Kalalao, 9.9 km 34° Ambodifotatra	-16.922	49.887	100	ex rotten log|rainforest|1w|BOX-0620|http://www.antweb.org/specimen.do?name=CASENT0066837-D01
ASAMF802-06	CASENT0066838-D01	BLF13046	EF610989				Odontomachus coquereli	657	26-Nov-2005	Kalalao 100	California Academy of Sciences	Odontomachus	Odontomachus coquereli	Brian Fisher	bfisher@calacademy.org	B.L.Fisher et al.	26-Nov-2005	Madagascar	Toamasina		Kalalao 100	Ile Sainte Marie, Foret Kalalao, 9.9 km 34° Ambodifotatra	-16.922	49.887	100	ex rotten log|rainforest|1w|BOX-0620|http://www.antweb.org/specimen.do?name=CASENT0066838-D01
ASAMF803-06	CASENT0066839-D01	BLF13060	EF611033				Odontomachus troglodytes	657	26-Nov-2005	Kalalao 100	California Academy of Sciences	Odontomachus	Odontomachus troglodytes	Brian Fisher	bfisher@calacademy.org	B.L.Fisher et al.	26-Nov-2005	Madagascar	Toamasina		Kalalao 100	Ile Sainte Marie, Foret Kalalao, 9.9 km 34° Ambodifotatra	-16.922	49.887	100	under rotten log|rainforest|1w|BOX-0620|http://www.antweb.org/specimen.do?name=CASENT0066839-D01
ASAMF804-06	CASENT0066839-D02	BLF13060	EF611035				Odontomachus troglodytes	657	26-Nov-2005	Kalalao 100	California Academy of Sciences	Odontomachus	Odontomachus troglodytes	Brian Fisher	bfisher@calacademy.org	B.L.Fisher et al.	26-Nov-2005	Madagascar	Toamasina		Kalalao 100	Ile Sainte Marie, Foret Kalalao, 9.9 km 34° Ambodifotatra	-16.922	49.887	100	under rotten log|rainforest|1l|BOX-0620|http://www.antweb.org/specimen.do?name=CASENT0066839-D02
ASAMF807-06	CASENT0066852-D01	BLF13133	EF610665				Anochetus grandidieri	657	29-Nov-2005	Betampona 390	California Academy of Sciences	Anochetus	Anochetus grandidieri	Brian Fisher	bfisher@calacademy.org	B.L.Fisher et al.	29-Nov-2005	Madagascar	Toamasina		Betampona 390	Reserve Betampona, Camp Rendrirendry 34.1 km 332° Toamasina	-17.924	49.2	390	ex rotten log|rainforest|1w|BOX-0620|http://www.antweb.org/specimen.do?name=CASENT0066852-D01
ASAMF808-06	CASENT0066852-D02	BLF13133	EF610632				Anochetus grandidieri	657	29-Nov-2005	Betampona 390	California Academy of Sciences	Anochetus	Anochetus grandidieri	Brian Fisher	bfisher@calacademy.org	B.L.Fisher et al.	29-Nov-2005	Madagascar	Toamasina		Betampona 390	Reserve Betampona, Camp Rendrirendry 34.1 km 332° Toamasina	-17.924	49.2	390	ex rotten log|rainforest|1l|BOX-0620|http://www.antweb.org/specimen.do?name=CASENT0066852-D02
ASAMF809-06	CASENT0066853-D01	BLF13207	EF610978				Odontomachus coquereli	657	30-Nov-2005	Betampona 390	California Academy of Sciences	Odontomachus	Odontomachus coquereli	Brian Fisher	bfisher@calacademy.org	B.L.Fisher et al.	30-Nov-2005	Madagascar	Toamasina		Betampona 390	Reserve Betampona, Camp Rendrirendry 34.1 km 332° Toamasina	-17.924	49.2	390	ex rotten log|rainforest|1w|BOX-0620|http://www.antweb.org/specimen.do?name=CASENT0066853-D01
ASAMF810-06	CASENT0066853-D02	BLF13207	EF610979				Odontomachus coquereli	657	30-Nov-2005	Betampona 390	California Academy of Sciences	Odontomachus	Odontomachus coquereli	Brian Fisher	bfisher@calacademy.org	B.L.Fisher et al.	30-Nov-2005	Madagascar	Toamasina		Betampona 390	Reserve Betampona, Camp Rendrirendry 34.1 km 332° Toamasina	-17.924	49.2	390	ex rotten log|rainforest|1l|BOX-0620|http://www.antweb.org/specimen.do?name=CASENT0066853-D02
ASAMF811-06	CASENT0066854-D01	BLF13353	EF610980				Odontomachus coquereli	657	03-Dec-2005	Betampona 520	California Academy of Sciences	Odontomachus	Odontomachus coquereli	Brian Fisher	bfisher@calacademy.org	B.L.Fisher et al.	03-Dec-2005	Madagascar	Toamasina		Betampona 520	Reserve Betampona, Camp Vohitsivalana, 37.1 km 338° Toamasina	-17.887	49.202	520	under stone|rainforest|1w|BOX-0620|http://www.antweb.org/specimen.do?name=CASENT0066854-D01
ASAMF812-06	CASENT0066855-D01	BLF13358	EF610981				Odontomachus coquereli	657	03-Dec-2005	Betampona 520	California Academy of Sciences	Odontomachus	Odontomachus coquereli	Brian Fisher	bfisher@calacademy.org	B.L.Fisher et al.	03-Dec-2005	Madagascar	Toamasina		Betampona 520	Reserve Betampona, Camp Vohitsivalana, 37.1 km 338° Toamasina	-17.887	49.202	520	ex rotten log|rainforest|1w|BOX-0620|http://www.antweb.org/specimen.do?name=CASENT0066855-D01
ASAMF813-06	CASENT0066855-D02	BLF13358	EF610982				Odontomachus coquereli	657	03-Dec-2005	Betampona 520	California Academy of Sciences	Odontomachus	Odontomachus coquereli	Brian Fisher	bfisher@calacademy.org	B.L.Fisher et al.	03-Dec-2005	Madagascar	Toamasina		Betampona 520	Reserve Betampona, Camp Vohitsivalana, 37.1 km 338° Toamasina	-17.887	49.202	520	ex rotten log|rainforest|1l|BOX-0620|http://www.antweb.org/specimen.do?name=CASENT0066855-D02
ASAMF814-06	CASENT0066856-D01	BLF13361	EF610984				Odontomachus coquereli	657	03-Dec-2005	Betampona 520	California Academy of Sciences	Odontomachus	Odontomachus coquereli	Brian Fisher	bfisher@calacademy.org	B.L.Fisher et al.	03-Dec-2005	Madagascar	Toamasina		Betampona 520	Reserve Betampona, Camp Vohitsivalana, 37.1 km 338° Toamasina	-17.887	49.202	520	ex rotten log|rainforest|1w|BOX-0620|http://www.antweb.org/specimen.do?name=CASENT0066856-D01
ASAMF815-06	CASENT0066856-D02	BLF13361	EF610986				Odontomachus coquereli	657	03-Dec-2005	Betampona 520	California Academy of Sciences	Odontomachus	Odontomachus coquereli	Brian Fisher	bfisher@calacademy.org	B.L.Fisher et al.	03-Dec-2005	Madagascar	Toamasina		Betampona 520	Reserve Betampona, Camp Vohitsivalana, 37.1 km 338° Toamasina	-17.887	49.202	520	ex rotten log|rainforest|1l|BOX-0620|http://www.antweb.org/specimen.do?name=CASENT0066856-D02
ASAMF816-06	CASENT0066857-D01	BLF13362	EF610987				Odontomachus coquereli	657	03-Dec-2005	Betampona 520	California Academy of Sciences	Odontomachus	Odontomachus coquereli	Brian Fisher	bfisher@calacademy.org	B.L.Fisher et al.	03-Dec-2005	Madagascar	Toamasina		Betampona 520	Reserve Betampona, Camp Vohitsivalana, 37.1 km 338° Toamasina	-17.887	49.202	520	ex rotten log|rainforest|1w|BOX-0620|http://www.antweb.org/specimen.do?name=CASENT0066857-D01
ASAMF817-06	CASENT0066857-D02	BLF13362	EF610988				Odontomachus coquereli	657	03-Dec-2005	Betampona 520	California Academy of Sciences	Odontomachus	Odontomachus coquereli	Brian Fisher	bfisher@calacademy.org	B.L.Fisher et al.	03-Dec-2005	Madagascar	Toamasina		Betampona 520	Reserve Betampona, Camp Vohitsivalana, 37.1 km 338° Toamasina	-17.887	49.202	520	ex rotten log|rainforest|1l|BOX-0620|http://www.antweb.org/specimen.do?name=CASENT0066857-D02
ASAMF818-06	CASENT0066858-D01	BLF13367	EF610990				Odontomachus coquereli	657	03-Dec-2005	Betampona 520	California Academy of Sciences	Odontomachus	Odontomachus coquereli	Brian Fisher	bfisher@calacademy.org	B.L.Fisher et al.	03-Dec-2005	Madagascar	Toamasina		Betampona 520	Reserve Betampona, Camp Vohitsivalana, 37.1 km 338° Toamasina	-17.887	49.202	520	under stone|rainforest|1w|BOX-0620|http://www.antweb.org/specimen.do?name=CASENT0066858-D01
ASAMF819-06	CASENT0066859-D01	BLF13247	EF610991				Odontomachus coquereli	657	01-Dec-2005	Betampona 520	California Academy of Sciences	Odontomachus	Odontomachus coquereli	Brian Fisher	bfisher@calacademy.org	B.L.Fisher et al.	01-Dec-2005	Madagascar	Toamasina		Betampona 520	Reserve Betampona, Camp Vohitsivalana, 37.1 km 338° Toamasina	-17.887	49.202	520	ex rotten log|rainforest|1w|BOX-0620|http://www.antweb.org/specimen.do?name=CASENT0066859-D01
ASAMF820-06	CASENT0066859-D02	BLF13247	EF610992				Odontomachus coquereli	657	01-Dec-2005	Betampona 520	California Academy of Sciences	Odontomachus	Odontomachus coquereli	Brian Fisher	bfisher@calacademy.org	B.L.Fisher et al.	01-Dec-2005	Madagascar	Toamasina		Betampona 520	Reserve Betampona, Camp Vohitsivalana, 37.1 km 338° Toamasina	-17.887	49.202	520	ex rotten log|rainforest|1l|BOX-0620|http://www.antweb.org/specimen.do?name=CASENT0066859-D02
ASAMV234-06	CASENT0066938-D01	BLF13621	EF610995				Odontomachus coquereli	648	13-Dec-2005	Marojejy 775	California Academy of Sciences	Odontomachus	Odontomachus coquereli	Brian Fisher	bfisher@calacademy.org	B.L.Fisher et al.	13-Dec-2005	Madagascar	Antsiranana, Faritany d'		Marojejy 775	Parc National de Marojejy, Manantenina River, 27.6 km 35° NE Andapa, 9.6 km 327° NNW Manantenina	-14.435	49.76	775	ex rotten log|rainforest|right hind leg of worker|BOX-0624|http://www.antweb.org/specimen.do?name=CASENT0066938-D01
ASAMF821-06	CASENT0067007-D01	BLF13013	EF611037				Odontomachus troglodytes	657	25-Nov-2005	Ampanihy 10	California Academy of Sciences	Odontomachus	Odontomachus troglodytes	Brian Fisher	bfisher@calacademy.org	B.L.Fisher et al.	25-Nov-2005	Madagascar	Toamasina		Ampanihy 10	Ile Sainte Marie, Foret Ampanihy, 14.4 km 52° Ambodifotatra	-16.911	49.939	10	ex rotten log|littoral rainforest|1w|BOX-0620|http://www.antweb.org/specimen.do?name=CASENT0067007-D01
ASAMF822-06	CASENT0067009-D01	BLF13116	EF611039				Odontomachus troglodytes	657	27-Nov-2005	Mahavelona 30	California Academy of Sciences	Odontomachus	Odontomachus troglodytes	Brian Fisher	bfisher@calacademy.org	B.L.Fisher et al.	27-Nov-2005	Madagascar	Toamasina		Mahavelona 30	2.1 km 315° Mahavelona	-17.67	49.496	30	under rotten log|eucalyptus plantation|1w|BOX-0620|http://www.antweb.org/specimen.do?name=CASENT0067009-D01
ASAMF823-06	CASENT0067009-D02	BLF13116	EF611024				Odontomachus troglodytes	657	27-Nov-2005	Mahavelona 30	California Academy of Sciences	Odontomachus	Odontomachus troglodytes	Brian Fisher	bfisher@calacademy.org	B.L.Fisher et al.	27-Nov-2005	Madagascar	Toamasina		Mahavelona 30	2.1 km 315° Mahavelona	-17.67	49.496	30	under rotten log|eucalyptus plantation|1l|BOX-0620|http://www.antweb.org/specimen.do?name=CASENT0067009-D02
ASAMF824-06	CASENT0067010-D01	BLF13121	EF611025				Odontomachus troglodytes	657	27-Nov-2005	Mahavelona 30	California Academy of Sciences	Odontomachus	Odontomachus troglodytes	Brian Fisher	bfisher@calacademy.org	B.L.Fisher et al.	27-Nov-2005	Madagascar	Toamasina		Mahavelona 30	2.1 km 315° Mahavelona	-17.67	49.496	30	ex rotten log|eucalyptus plantation|1w|BOX-0620|http://www.antweb.org/specimen.do?name=CASENT0067010-D01
ASAMF825-06	CASENT0067011-D01	BLF13091	EF610763				Anochetus madagascarensis	657	27-Nov-2005	Analalava 50	California Academy of Sciences	Anochetus	Anochetus madagascarensis	Brian Fisher	bfisher@calacademy.org	B.L.Fisher et al.	27-Nov-2005	Madagascar	Toamasina		Analalava 50	Analalava, 7.0 km 255° Mahavelona	-17.71	49.454	50	ground forager(s)|littoral rainforest|1w|BOX-0620|http://www.antweb.org/specimen.do?name=CASENT0067011-D01
ASAMF826-06	CASENT0067012-D01	BLF13098	EF610765				Anochetus madagascarensis	657	27-Nov-2005	Analalava 50	California Academy of Sciences	Anochetus	Anochetus madagascarensis	Brian Fisher	bfisher@calacademy.org	B.L.Fisher et al.	27-Nov-2005	Madagascar	Toamasina		Analalava 50	Analalava, 7.0 km 255° Mahavelona	-17.71	49.454	50	ex rotten log|littoral rainforest|1w|BOX-0620|http://www.antweb.org/specimen.do?name=CASENT0067012-D01
ASAMF827-06	CASENT0067013-D01	BLF13109	EF610767				Anochetus madagascarensis	657	27-Nov-2005	Analalava 50	California Academy of Sciences	Anochetus	Anochetus madagascarensis	Brian Fisher	bfisher@calacademy.org	B.L.Fisher et al.	27-Nov-2005	Madagascar	Toamasina		Analalava 50	Analalava, 7.0 km 255° Mahavelona	-17.71	49.454	50	ex rotten log|littoral rainforest|1w|BOX-0620|http://www.antweb.org/specimen.do?name=CASENT0067013-D01
ASAMV245-06	CASENT0067298-D01	BLF12465	EF610690				Anochetus grandidieri	621	13-Nov-2005	Mandrisy	California Academy of Sciences	Anochetus	Anochetus grandidieri	Brian Fisher	bfisher@calacademy.org	B.L.Fisher et al.	13-Nov-2005	Madagascar	Toamasina		Mandrisy	Foret d'Analava Mandrisy, 5.9 km 195ºAntanambe	-16.486	49.847	10	ex rotten log|littoral rainforest|1w|BOX-0624|http://www.antweb.org/specimen.do?name=CASENT0067298-D01
ASAMV280-06	CASENT0067669-D01	BLF13333	EF610696				Anochetus grandidieri	568	02-Dec-2005	Betampona 520	California Academy of Sciences	Anochetus	Anochetus grandidieri	Brian Fisher	bfisher@calacademy.org	B.L.Fisher et al.	02-Dec-2005	Madagascar	Toamasina		Betampona 520	Reserve Betampona, Camp Vohitsivalana, 37.1 km 338° Toamasina	-17.887	49.202	520	ex rotten log|rainforest|1w|BOX-0624|http://www.antweb.org/specimen.do?name=CASENT0067669-D01
ASAMV298-06	CASENT0068008-D01	BLF12750	EF610684				Anochetus grandidieri	574	18-Nov-2005	Ambodiriana 125	California Academy of Sciences	Anochetus	Anochetus grandidieri	Brian Fisher	bfisher@calacademy.org	B.L.Fisher et al.	18-Nov-2005	Madagascar	Toamasina		Ambodiriana 125	Res. Ambodiriana, 4.8 km 306°Manompana, along Manompana river	-16.672	49.701	125	ex rotten log|rainforest|1w|BOX-0624|http://www.antweb.org/specimen.do?name=CASENT0068008-D01
ASAMY132-07	CASENT0068065-D01	BLF12706	EU119698				Anochetus grandidieri	657	18-Nov-2005	Ambodiriana 125	California Academy of Sciences	Anochetus	Anochetus grandidieri	Brian Fisher	bfisher@calacademy.org	B.L.Fisher et al.	18-Nov-2005	Madagascar	Toamasina		Ambodiriana 125	Res. Ambodiriana, 4.8 km 306°Manompana, along Manompana river	-16.672	49.701	125	sifted litter|rainforest|1w|BOX-1942|http://www.antweb.org/specimen.do?name=CASENT0068065-D01
ASAMY133-07	CASENT0068066-D01	BLF12706	EU119703		EU073664		Anochetus grandidieri	654	18-Nov-2005	Ambodiriana 125	California Academy of Sciences	Anochetus	Anochetus grandidieri	Brian Fisher	bfisher@calacademy.org	B.L.Fisher et al.	18-Nov-2005	Madagascar	Toamasina		Ambodiriana 125	Res. Ambodiriana, 4.8 km 306°Manompana, along Manompana river	-16.672	49.701	125	sifted litter|rainforest|1w|BOX-1942|http://www.antweb.org/specimen.do?name=CASENT0068066-D01
ASAMY134-07	CASENT0068067-D01	BLF12706	EU119699		EU073665		Anochetus grandidieri	657	18-Nov-2005	Ambodiriana 125	California Academy of Sciences	Anochetus	Anochetus grandidieri	Brian Fisher	bfisher@calacademy.org	B.L.Fisher et al.	18-Nov-2005	Madagascar	Toamasina		Ambodiriana 125	Res. Ambodiriana, 4.8 km 306°Manompana, along Manompana river	-16.672	49.701	125	sifted litter|rainforest|1w|BOX-1942|http://www.antweb.org/specimen.do?name=CASENT0068067-D01
ASAMY135-07	CASENT0068068-D01	BLF12706	EU119711				Anochetus grandidieri	623	18-Nov-2005	Ambodiriana 125	California Academy of Sciences	Anochetus	Anochetus grandidieri	Brian Fisher	bfisher@calacademy.org	B.L.Fisher et al.	18-Nov-2005	Madagascar	Toamasina		Ambodiriana 125	Res. Ambodiriana, 4.8 km 306°Manompana, along Manompana river	-16.672	49.701	125	sifted litter|rainforest|1w|BOX-1942|http://www.antweb.org/specimen.do?name=CASENT0068068-D01
ASAMY136-07	CASENT0068069-D01	BLF12706	EU119709				Anochetus grandidieri	631	18-Nov-2005	Ambodiriana 125	California Academy of Sciences	Anochetus	Anochetus grandidieri	Brian Fisher	bfisher@calacademy.org	B.L.Fisher et al.	18-Nov-2005	Madagascar	Toamasina		Ambodiriana 125	Res. Ambodiriana, 4.8 km 306°Manompana, along Manompana river	-16.672	49.701	125	sifted litter|rainforest|1w|BOX-1942|http://www.antweb.org/specimen.do?name=CASENT0068069-D01
ASAMY137-07	CASENT0068070-D01	BLF12706	EU119702				Anochetus grandidieri	654	18-Nov-2005	Ambodiriana 125	California Academy of Sciences	Anochetus	Anochetus grandidieri	Brian Fisher	bfisher@calacademy.org	B.L.Fisher et al.	18-Nov-2005	Madagascar	Toamasina		Ambodiriana 125	Res. Ambodiriana, 4.8 km 306°Manompana, along Manompana river	-16.672	49.701	125	sifted litter|rainforest|1w|BOX-1942|http://www.antweb.org/specimen.do?name=CASENT0068070-D01
ASAMY139-07	CASENT0068072-D01	BLF12706	EU119680		EU073666		Anochetus grandidieri	657	18-Nov-2005	Ambodiriana 125	California Academy of Sciences	Anochetus	Anochetus grandidieri	Brian Fisher	bfisher@calacademy.org	B.L.Fisher et al.	18-Nov-2005	Madagascar	Toamasina		Ambodiriana 125	Res. Ambodiriana, 4.8 km 306°Manompana, along Manompana river	-16.672	49.701	125	sifted litter|rainforest|1w|BOX-1943|http://www.antweb.org/specimen.do?name=CASENT0068072-D01
ASAMY140-07	CASENT0068073-D01	BLF12706	EU119683		EU073667		Anochetus grandidieri	657	18-Nov-2005	Ambodiriana 125	California Academy of Sciences	Anochetus	Anochetus grandidieri	Brian Fisher	bfisher@calacademy.org	B.L.Fisher et al.	18-Nov-2005	Madagascar	Toamasina		Ambodiriana 125	Res. Ambodiriana, 4.8 km 306°Manompana, along Manompana river	-16.672	49.701	125	sifted litter|rainforest|1w|BOX-1943|http://www.antweb.org/specimen.do?name=CASENT0068073-D01
ASAMY141-07	CASENT0068074-D01	BLF12706	EU119686				Anochetus grandidieri	657	18-Nov-2005	Ambodiriana 125	California Academy of Sciences	Anochetus	Anochetus grandidieri	Brian Fisher	bfisher@calacademy.org	B.L.Fisher et al.	18-Nov-2005	Madagascar	Toamasina		Ambodiriana 125	Res. Ambodiriana, 4.8 km 306°Manompana, along Manompana river	-16.672	49.701	125	sifted litter|rainforest|1w|BOX-1943|http://www.antweb.org/specimen.do?name=CASENT0068074-D01
ASAMY142-07	CASENT0068075-D01	BLF12706	EU119687		EU073668		Anochetus grandidieri	657	18-Nov-2005	Ambodiriana 125	California Academy of Sciences	Anochetus	Anochetus grandidieri	Brian Fisher	bfisher@calacademy.org	B.L.Fisher et al.	18-Nov-2005	Madagascar	Toamasina		Ambodiriana 125	Res. Ambodiriana, 4.8 km 306°Manompana, along Manompana river	-16.672	49.701	125	sifted litter|rainforest|1w|BOX-1943|http://www.antweb.org/specimen.do?name=CASENT0068075-D01
ASAMY143-07	CASENT0068076-D01	BLF12706	EU119707		EU073669		Anochetus grandidieri	631	18-Nov-2005	Ambodiriana 125	California Academy of Sciences	Anochetus	Anochetus grandidieri	Brian Fisher	bfisher@calacademy.org	B.L.Fisher et al.	18-Nov-2005	Madagascar	Toamasina		Ambodiriana 125	Res. Ambodiriana, 4.8 km 306°Manompana, along Manompana river	-16.672	49.701	125	sifted litter|rainforest|1w|BOX-1943|http://www.antweb.org/specimen.do?name=CASENT0068076-D01
ASAMY144-07	CASENT0068077-D01	BLF12706	EU119690		EU073670		Anochetus grandidieri	657	18-Nov-2005	Ambodiriana 125	California Academy of Sciences	Anochetus	Anochetus grandidieri	Brian Fisher	bfisher@calacademy.org	B.L.Fisher et al.	18-Nov-2005	Madagascar	Toamasina		Ambodiriana 125	Res. Ambodiriana, 4.8 km 306°Manompana, along Manompana river	-16.672	49.701	125	sifted litter|rainforest|1w|BOX-1943|http://www.antweb.org/specimen.do?name=CASENT0068077-D01
ASAMY145-07	CASENT0068078-D01	BLF12706	EU119691		EU073671		Anochetus grandidieri	657	18-Nov-2005	Ambodiriana 125	California Academy of Sciences	Anochetus	Anochetus grandidieri	Brian Fisher	bfisher@calacademy.org	B.L.Fisher et al.	18-Nov-2005	Madagascar	Toamasina		Ambodiriana 125	Res. Ambodiriana, 4.8 km 306°Manompana, along Manompana river	-16.672	49.701	125	sifted litter|rainforest|1w|BOX-1943|http://www.antweb.org/specimen.do?name=CASENT0068078-D01
ASAMY146-07	CASENT0068079-D01	BLF12706	EU119692		EU073672		Anochetus grandidieri	657	18-Nov-2005	Ambodiriana 125	California Academy of Sciences	Anochetus	Anochetus grandidieri	Brian Fisher	bfisher@calacademy.org	B.L.Fisher et al.	18-Nov-2005	Madagascar	Toamasina		Ambodiriana 125	Res. Ambodiriana, 4.8 km 306°Manompana, along Manompana river	-16.672	49.701	125	sifted litter|rainforest|1w|BOX-1943|http://www.antweb.org/specimen.do?name=CASENT0068079-D01
ASAMV299-06	CASENT0068187-D01	BLF13398	EF610686				Anochetus grandidieri	601	11-Dec-2005	Marojejy 775	California Academy of Sciences	Anochetus	Anochetus grandidieri	Brian Fisher	bfisher@calacademy.org	B.L.Fisher et al.	11-Dec-2005	Madagascar	Antsiranana, Faritany d'		Marojejy 775	Parc National de Marojejy, Manantenina River, 27.6 km 35° NE Andapa, 9.6 km 327° NNW Manantenina	-14.435	49.76	775	ground nest|rainforest|1w|BOX-0624|http://www.antweb.org/specimen.do?name=CASENT0068187-D01
ASAMV335-06	CASENT0068352-D01	SMG14998	EF610839				Anochetus pattersoni	656	19-Dec-2005	Aldabra Picard Island	California Academy of Sciences	Anochetus	Anochetus pattersoni	Brian Fisher	bfisher@calacademy.org	S.M.Goodman	19-Dec-2005	Seychelles			Aldabra Picard Island	Aldabra Island Group, Picard Island, in old "Settlement"	-9.393	46.204	5	found after dark on concrete slab in abandoned settlement|mostly Casuarinia with coco palms, exotic vegetation|1w|BOX-0624|http://www.antweb.org/specimen.do?name=CASENT0068352-D01
ASAMV336-06	CASENT0068356-D01	BLF12989	EF610691				Anochetus grandidieri	565	24-Nov-2005	Kalalao 100	California Academy of Sciences	Anochetus	Anochetus grandidieri	Brian Fisher	bfisher@calacademy.org	B.L.Fisher et al.	24-Nov-2005	Madagascar	Toamasina		Kalalao 100	Ile Sainte Marie, Foret Kalalao, 9.9 km 34° Ambodifotatra	-16.922	49.887	100	sifted litter|rainforest|1w|BOX-0624|http://www.antweb.org/specimen.do?name=CASENT0068356-D01
ASAMV337-06	CASENT0068358-D01	BLF12989	EF610693				Anochetus grandidieri	571	24-Nov-2005	Kalalao 100	California Academy of Sciences	Anochetus	Anochetus grandidieri	Brian Fisher	bfisher@calacademy.org	B.L.Fisher et al.	24-Nov-2005	Madagascar	Toamasina		Kalalao 100	Ile Sainte Marie, Foret Kalalao, 9.9 km 34° Ambodifotatra	-16.922	49.887	100	sifted litter|rainforest|1w|BOX-0624|http://www.antweb.org/specimen.do?name=CASENT0068358-D01
ASAMV339-06	CASENT0068472-D01	BLF13242	EF610694				Anochetus grandidieri	572	01-Dec-2005	Betampona 520	California Academy of Sciences	Anochetus	Anochetus grandidieri	Brian Fisher	bfisher@calacademy.org	B.L.Fisher et al.	01-Dec-2005	Madagascar	Toamasina		Betampona 520	Reserve Betampona, Camp Vohitsivalana, 37.1 km 338° Toamasina	-17.887	49.202	520	sifted litter|rainforest|1w|BOX-0624|http://www.antweb.org/specimen.do?name=CASENT0068472-D01
ASAMV340-06	CASENT0068475-D01	BLF13242	EF610695				Anochetus grandidieri	578	01-Dec-2005	Betampona 520	California Academy of Sciences	Anochetus	Anochetus grandidieri	Brian Fisher	bfisher@calacademy.org	B.L.Fisher et al.	01-Dec-2005	Madagascar	Toamasina		Betampona 520	Reserve Betampona, Camp Vohitsivalana, 37.1 km 338° Toamasina	-17.887	49.202	520	sifted litter|rainforest|1w|BOX-0624|http://www.antweb.org/specimen.do?name=CASENT0068475-D01
ASAMV341-06	CASENT0068476-D01	BLF13242	EF610697				Anochetus grandidieri	573	01-Dec-2005	Betampona 520	California Academy of Sciences	Anochetus	Anochetus grandidieri	Brian Fisher	bfisher@calacademy.org	B.L.Fisher et al.	01-Dec-2005	Madagascar	Toamasina		Betampona 520	Reserve Betampona, Camp Vohitsivalana, 37.1 km 338° Toamasina	-17.887	49.202	520	sifted litter|rainforest|1w|BOX-0624|http://www.antweb.org/specimen.do?name=CASENT0068476-D01
ASAMV342-06	CASENT0068497-D01	BLF13242	EF610993				Odontomachus coquereli	547	01-Dec-2005	Betampona 520	California Academy of Sciences	Odontomachus	Odontomachus coquereli	Brian Fisher	bfisher@calacademy.org	B.L.Fisher et al.	01-Dec-2005	Madagascar	Toamasina		Betampona 520	Reserve Betampona, Camp Vohitsivalana, 37.1 km 338° Toamasina	-17.887	49.202	520	sifted litter|rainforest|right hind leg of worker|BOX-0624|http://www.antweb.org/specimen.do?name=CASENT0068497-D01
ASAMV343-06	CASENT0068617-D01	BLF12556	EF610685				Anochetus grandidieri	601	14-Nov-2005	Mananara-Nord 225	California Academy of Sciences	Anochetus	Anochetus grandidieri	Brian Fisher	bfisher@calacademy.org	B.L.Fisher et al.	14-Nov-2005	Madagascar	Toamasina		Mananara-Nord 225	Parc National Mananara-Nord, 7.1 km 261° Antanambe	-16.455	49.788	225	sifted litter|rainforest|1w|BOX-0624|http://www.antweb.org/specimen.do?name=CASENT0068617-D01
ASAMV344-06	CASENT0068622-D01	BLF12556	EF610687				Anochetus grandidieri	604	14-Nov-2005	Mananara-Nord 225	California Academy of Sciences	Anochetus	Anochetus grandidieri	Brian Fisher	bfisher@calacademy.org	B.L.Fisher et al.	14-Nov-2005	Madagascar	Toamasina		Mananara-Nord 225	Parc National Mananara-Nord, 7.1 km 261° Antanambe	-16.455	49.788	225	sifted litter|rainforest|1w|BOX-0624|http://www.antweb.org/specimen.do?name=CASENT0068622-D01
ASAMV345-06	CASENT0068628-D01	BLF12556	EF610688				Anochetus grandidieri	613	14-Nov-2005	Mananara-Nord 225	California Academy of Sciences	Anochetus	Anochetus grandidieri	Brian Fisher	bfisher@calacademy.org	B.L.Fisher et al.	14-Nov-2005	Madagascar	Toamasina		Mananara-Nord 225	Parc National Mananara-Nord, 7.1 km 261° Antanambe	-16.455	49.788	225	sifted litter|rainforest|1w|BOX-0624|http://www.antweb.org/specimen.do?name=CASENT0068628-D01
ASAMV346-06	CASENT0068936-D01	BLF12840	EF610689				Anochetus grandidieri	550	21-Nov-2005	Ambohidena 20	California Academy of Sciences	Anochetus	Anochetus grandidieri	Brian Fisher	bfisher@calacademy.org	B.L.Fisher et al.	21-Nov-2005	Madagascar	Toamasina		Ambohidena 20	Ile Sainte Marie, Foret Ambohidena, 22.8 km 44° Ambodifotatra	-16.824	49.964	20	sifted litter|littoral rainforest|1w|BOX-0624|http://www.antweb.org/specimen.do?name=CASENT0068936-D01
ASAMV347-06	CASENT0069026-D01	BLF12840	EF611040				Odontomachus troglodytes	599	21-Nov-2005	Ambohidena 20	California Academy of Sciences	Odontomachus	Odontomachus troglodytes	Brian Fisher	bfisher@calacademy.org	B.L.Fisher et al.	21-Nov-2005	Madagascar	Toamasina		Ambohidena 20	Ile Sainte Marie, Foret Ambohidena, 22.8 km 44° Ambodifotatra	-16.824	49.964	20	sifted litter|littoral rainforest|right hind leg of worker|BOX-0624|http://www.antweb.org/specimen.do?name=CASENT0069026-D01
ASAMV363-06	CASENT0069747-D01	BLF12989	EF611041				Odontomachus troglodytes	600	24-Nov-2005	Kalalao 100	California Academy of Sciences	Odontomachus	Odontomachus troglodytes	Brian Fisher	bfisher@calacademy.org	B.L.Fisher et al.	24-Nov-2005	Madagascar	Toamasina		Kalalao 100	Ile Sainte Marie, Foret Kalalao, 9.9 km 34° Ambodifotatra	-16.922	49.887	100	sifted litter|rainforest|1w|BOX-0624|http://www.antweb.org/specimen.do?name=CASENT0069747-D01
ASAMV364-06	CASENT0069941-D01	BLF12556	EF610994				Odontomachus coquereli	602	14-Nov-2005	Mananara-Nord 225	California Academy of Sciences	Odontomachus	Odontomachus coquereli	Brian Fisher	bfisher@calacademy.org	B.L.Fisher et al.	14-Nov-2005	Madagascar	Toamasina		Mananara-Nord 225	Parc National Mananara-Nord, 7.1 km 261° Antanambe	-16.455	49.788	225	sifted litter|rainforest|right hind leg of worker|BOX-0624|http://www.antweb.org/specimen.do?name=CASENT0069941-D01
ASAMY196-07	CASENT0070143-D01	BLF13125	EU119679		EU073673		Anochetus grandidieri	657	28-Nov-2005	Betampona 390	California Academy of Sciences	Anochetus	Anochetus grandidieri	Brian Fisher	bfisher@calacademy.org	B.L.Fisher et al.	28-Nov-2005	Madagascar	Toamasina		Betampona 390	Reserve Betampona, Camp Rendrirendry 34.1 km 332° Toamasina	-17.924	49.2	390	sifted litter|rainforest|1w|BOX-1943|http://www.antweb.org/specimen.do?name=CASENT0070143-D01
ASAMY197-07	CASENT0070144-D01	BLF13125	EU119681		EU073674		Anochetus grandidieri	657	28-Nov-2005	Betampona 390	California Academy of Sciences	Anochetus	Anochetus grandidieri	Brian Fisher	bfisher@calacademy.org	B.L.Fisher et al.	28-Nov-2005	Madagascar	Toamasina		Betampona 390	Reserve Betampona, Camp Rendrirendry 34.1 km 332° Toamasina	-17.924	49.2	390	sifted litter|rainforest|1w|BOX-1943|http://www.antweb.org/specimen.do?name=CASENT0070144-D01
ASAMY200-07	CASENT0070411-D01	BLF12460	EU119700				Anochetus grandidieri	656	12-Nov-2005	Mandrisy	California Academy of Sciences	Anochetus	Anochetus grandidieri	Brian Fisher	bfisher@calacademy.org	B.L.Fisher et al.	12-Nov-2005	Madagascar	Toamasina		Mandrisy	Foret d'Analava Mandrisy, 5.9 km 195ºAntanambe	-16.486	49.847	10	sifted litter|littoral rainforest|1w|BOX-1942|http://www.antweb.org/specimen.do?name=CASENT0070411-D01
ASAMY218-07	CASENT0070496-D01	BLF12460	EU119704		EU073675		Anochetus grandidieri	650	12-Nov-2005	Mandrisy	California Academy of Sciences	Anochetus	Anochetus grandidieri	Brian Fisher	bfisher@calacademy.org	B.L.Fisher et al.	12-Nov-2005	Madagascar	Toamasina		Mandrisy	Foret d'Analava Mandrisy, 5.9 km 195ºAntanambe	-16.486	49.847	10	sifted litter|littoral rainforest|1w|BOX-1942|http://www.antweb.org/specimen.do?name=CASENT0070496-D01
ASAMY224-07	CASENT0070513-D01	BLF12460	EU119701		EU073676		Anochetus grandidieri	655	12-Nov-2005	Mandrisy	California Academy of Sciences	Anochetus	Anochetus grandidieri	Brian Fisher	bfisher@calacademy.org	B.L.Fisher et al.	12-Nov-2005	Madagascar	Toamasina		Mandrisy	Foret d'Analava Mandrisy, 5.9 km 195ºAntanambe	-16.486	49.847	10	sifted litter|littoral rainforest|1w|BOX-1942|http://www.antweb.org/specimen.do?name=CASENT0070513-D01
ASAMX676-06	CASENT0070618-D01	BLF14280	EF610674				Anochetus grandidieri	657	24-Apr-2006	Vevembe 600	California Academy of Sciences	Anochetus	Anochetus grandidieri	Brian Fisher	bfisher@calacademy.org	B.L.Fisher et al.	24-Apr-2006	Madagascar	Fianarantsoa		Vevembe 600	Foret de Vevembe, 66.6 km 293° Farafangana	-22.791	47.182	600	ex rotten log|rainforest, transition to montane forest|1w|BOX-1229|http://www.antweb.org/specimen.do?name=CASENT0070618-D01
ASAMX683-06	CASENT0070656-D01	BLF14227	EF610681				Anochetus grandidieri	657	24-Apr-2006	Vevembe 600	California Academy of Sciences	Anochetus	Anochetus grandidieri	Brian Fisher	bfisher@calacademy.org	B.L.Fisher et al.	24-Apr-2006	Madagascar	Fianarantsoa		Vevembe 600	Foret de Vevembe, 66.6 km 293° Farafangana	-22.791	47.182	600	ex rotten log|rainforest, transition to montane forest|1w|BOX-1229|http://www.antweb.org/specimen.do?name=CASENT0070656-D01
ASAMX684-06	CASENT0070670-D01	BLF14266	EF610683				Anochetus grandidieri	657	24-Apr-2006	Vevembe 600	California Academy of Sciences	Anochetus	Anochetus grandidieri	Brian Fisher	bfisher@calacademy.org	B.L.Fisher et al.	24-Apr-2006	Madagascar	Fianarantsoa		Vevembe 600	Foret de Vevembe, 66.6 km 293° Farafangana	-22.791	47.182	600	ex rotten log|rainforest, transition to montane forest|1w|BOX-1229|http://www.antweb.org/specimen.do?name=CASENT0070670-D01
ASAMX687-06	CASENT0070699-D01	BLF14155	EF610668				Anochetus grandidieri	657	23-Apr-2006	Vevembe 600	California Academy of Sciences	Anochetus	Anochetus grandidieri	Brian Fisher	bfisher@calacademy.org	B.L. Fisher et al.	23-Apr-2006	Madagascar	Fianarantsoa		Vevembe 600	Foret de Vevembe, 66.6 km 293° Farafangana	-22.791	47.182	600	ex rotten log|rainforest, transition to montane forest|1w|BOX-1229|http://www.antweb.org/specimen.do?name=CASENT0070699-D01
ASAMX688-06	CASENT0070707-D01	BLF14206	EF610670				Anochetus grandidieri	657	24-Apr-2006	Vevembe 600	California Academy of Sciences	Anochetus	Anochetus grandidieri	Brian Fisher	bfisher@calacademy.org	B.L. Fisher et al.	24-Apr-2006	Madagascar	Fianarantsoa		Vevembe 600	Foret de Vevembe, 66.6 km 293° Farafangana	-22.791	47.182	600	ex rotten log|rainforest, transition to montane forest|1w|BOX-1229|http://www.antweb.org/specimen.do?name=CASENT0070707-D01
ASAMX689-06	CASENT0070717-D01	BLF14164	EF610672				Anochetus grandidieri	657	23-Apr-2006	Vevembe 600	California Academy of Sciences	Anochetus	Anochetus grandidieri	Brian Fisher	bfisher@calacademy.org	B.L. Fisher et al.	23-Apr-2006	Madagascar	Fianarantsoa		Vevembe 600	Foret de Vevembe, 66.6 km 293° Farafangana	-22.791	47.182	600	ex rotten log|rainforest, transition to montane forest|1w|BOX-1229|http://www.antweb.org/specimen.do?name=CASENT0070717-D01
ASAMX692-06	CASENT0070737-D01	BLF14176	EF610676				Anochetus grandidieri	657	23-Apr-2006	Vevembe 600	California Academy of Sciences	Anochetus	Anochetus grandidieri	Brian Fisher	bfisher@calacademy.org	B.L. Fisher et al.	23-Apr-2006	Madagascar	Fianarantsoa		Vevembe 600	Foret de Vevembe, 66.6 km 293° Farafangana	-22.791	47.182	600	ex rotten log|rainforest, transition to montane forest|1w|BOX-1229|http://www.antweb.org/specimen.do?name=CASENT0070737-D01
ASAMX693-06	CASENT0070766-D01	BLF14260	EF610677				Anochetus grandidieri	657	24-Apr-2006	Vevembe 600	California Academy of Sciences	Anochetus	Anochetus grandidieri	Brian Fisher	bfisher@calacademy.org	B.L.Fisher et al.	24-Apr-2006	Madagascar	Fianarantsoa		Vevembe 600	Foret de Vevembe, 66.6 km 293° Farafangana	-22.791	47.182	600	ex rotten log|rainforest, transition to montane forest|1w|BOX-1229|http://www.antweb.org/specimen.do?name=CASENT0070766-D01
ASAMX694-06	CASENT0070830-D01	BLF14146	EF610678				Anochetus grandidieri	657	23-Apr-2006	Vevembe 600	California Academy of Sciences	Anochetus	Anochetus grandidieri	Brian Fisher	bfisher@calacademy.org	B.L. Fisher et al.	23-Apr-2006	Madagascar	Fianarantsoa		Vevembe 600	Foret de Vevembe, 66.6 km 293° Farafangana	-22.791	47.182	600	ex rotten log|rainforest, transition to montane forest|1w|BOX-1229|http://www.antweb.org/specimen.do?name=CASENT0070830-D01
ASAMX700-06	CASENT0070912-D01	BLF13866	EF610804				Anochetus madagascarensis	657	19-Apr-2006	Mahabo 20	California Academy of Sciences	Anochetus	Anochetus madagascarensis	Brian Fisher	bfisher@calacademy.org	B.L. Fisher et al.	19-Apr-2006	Madagascar	Fianarantsoa		Mahabo 20	Reserve Forestiere d'Agnalazaha, Mahabo, 42.9 km 215° Farafangana	-23.194	47.723	20	ex rotten log|littoral rainforest|1w|BOX-1229|http://www.antweb.org/specimen.do?name=CASENT0070912-D01
ASAMX705-06	CASENT0070928-D01	BLF13905	EF610673				Anochetus grandidieri	657	19-Apr-2006	Mahabo 20	California Academy of Sciences	Anochetus	Anochetus grandidieri	Brian Fisher	bfisher@calacademy.org	B.L. Fisher et al.	19-Apr-2006	Madagascar	Fianarantsoa		Mahabo 20	Reserve Forestiere d'Agnalazaha, Mahabo, 42.9 km 215° Farafangana	-23.194	47.723	20	under moss on rotten log|littoral rainforest|1w|BOX-1229|http://www.antweb.org/specimen.do?name=CASENT0070928-D01
ASAMX708-06	CASENT0070946-D01	BLF13851	EF610788				Anochetus madagascarensis	657	19-Apr-2006	Mahabo 20	California Academy of Sciences	Anochetus	Anochetus madagascarensis	Brian Fisher	bfisher@calacademy.org	B.L. Fisher et al.	19-Apr-2006	Madagascar	Fianarantsoa		Mahabo 20	Reserve Forestiere d'Agnalazaha, Mahabo, 42.9 km 215° Farafangana	-23.194	47.723	20	ex rotten log|littoral rainforest|1w|BOX-1229|http://www.antweb.org/specimen.do?name=CASENT0070946-D01
ASAMX711-06	CASENT0070968-D01	BLF13850	EF610679				Anochetus grandidieri	657	19-Apr-2006	Mahabo 20	California Academy of Sciences	Anochetus	Anochetus grandidieri	Brian Fisher	bfisher@calacademy.org	B.L. Fisher et al.	19-Apr-2006	Madagascar	Fianarantsoa		Mahabo 20	Reserve Forestiere d'Agnalazaha, Mahabo, 42.9 km 215° Farafangana	-23.194	47.723	20	ex rotten log|littoral rainforest|1w|BOX-1229|http://www.antweb.org/specimen.do?name=CASENT0070968-D01
ASAMX712-06	CASENT0070971-D01	BLF13840	EF610680				Anochetus grandidieri	657	19-Apr-2006	Mahabo 20	California Academy of Sciences	Anochetus	Anochetus grandidieri	Brian Fisher	bfisher@calacademy.org	B.L. Fisher et al.	19-Apr-2006	Madagascar	Fianarantsoa		Mahabo 20	Reserve Forestiere d'Agnalazaha, Mahabo, 42.9 km 215° Farafangana	-23.194	47.723	20	ex rotten log|littoral rainforest|1w|BOX-1229|http://www.antweb.org/specimen.do?name=CASENT0070971-D01
ASAMX716-06	CASENT0070988-D01	BLF13959	EF610774				Anochetus madagascarensis	657	20-Apr-2006	Mahabo 20	California Academy of Sciences	Anochetus	Anochetus madagascarensis	Brian Fisher	bfisher@calacademy.org	B.L. Fisher et al.	20-Apr-2006	Madagascar	Fianarantsoa		Mahabo 20	Reserve Forestiere d'Agnalazaha, Mahabo, 42.9 km 215° Farafangana	-23.194	47.723	20	under moss, on ground|littoral rainforest|1w|BOX-1229|http://www.antweb.org/specimen.do?name=CASENT0070988-D01
ASAMX717-06	CASENT0071129-D01	BLF14134	EF610667				Anochetus grandidieri	657	23-Apr-2006	Vevembe 600	California Academy of Sciences	Anochetus	Anochetus grandidieri	Brian Fisher	bfisher@calacademy.org	B.L. Fisher et al.	23-Apr-2006	Madagascar	Fianarantsoa		Vevembe 600	Foret de Vevembe, 66.6 km 293° Farafangana	-22.791	47.182	600	ex rotten log|rainforest, transition to montane forest|1w|BOX-1229|http://www.antweb.org/specimen.do?name=CASENT0071129-D01
ASAMX719-06	CASENT0071130-D01	BLF14197	EF610671				Anochetus grandidieri	657	24-Apr-2006	Vevembe 600	California Academy of Sciences	Anochetus	Anochetus grandidieri	Brian Fisher	bfisher@calacademy.org	B.L. Fisher et al.	24-Apr-2006	Madagascar	Fianarantsoa		Vevembe 600	Foret de Vevembe, 66.6 km 293° Farafangana	-22.791	47.182	600	ex rotten log|rainforest, transition to montane forest|1w|BOX-1229|http://www.antweb.org/specimen.do?name=CASENT0071130-D01
ASAMX722-06	CASENT0071135-D01	BLF14255	EF610675				Anochetus grandidieri	657	24-Apr-2006	Vevembe 600	California Academy of Sciences	Anochetus	Anochetus grandidieri	Brian Fisher	bfisher@calacademy.org	B.L.Fisher et al.	24-Apr-2006	Madagascar	Fianarantsoa		Vevembe 600	Foret de Vevembe, 66.6 km 293° Farafangana	-22.791	47.182	600	ex rotten log|rainforest, transition to montane forest|1w|BOX-1229|http://www.antweb.org/specimen.do?name=CASENT0071135-D01
ASAMX729-06	CASENT0071172-D01	BLF14318	EF610802				Anochetus madagascarensis	657	25-Apr-2006	Farafangana	California Academy of Sciences	Anochetus	Anochetus madagascarensis	Brian Fisher	bfisher@calacademy.org	B.L.Fisher et al.	25-Apr-2006	Madagascar	Fianarantsoa		Farafangana	Farafangana	-22.82	47.83	10	on low vegetation|urban gardens|1w|BOX-1229|http://www.antweb.org/specimen.do?name=CASENT0071172-D01
ASAMX736-06	CASENT0071202-D01	BLF13852	EF610784				Anochetus madagascarensis	657	19-Apr-2006	Mahabo 20	California Academy of Sciences	Anochetus	Anochetus madagascarensis	Brian Fisher	bfisher@calacademy.org	B.L. Fisher et al.	19-Apr-2006	Madagascar	Fianarantsoa		Mahabo 20	Reserve Forestiere d'Agnalazaha, Mahabo, 42.9 km 215° Farafangana	-23.194	47.723	20	ex rotten log|littoral rainforest|1w|BOX-1229|http://www.antweb.org/specimen.do?name=CASENT0071202-D01
ASAMX737-06	CASENT0071202-D02	BLF13852	EF610786				Anochetus madagascarensis	657	19-Apr-2006	Mahabo 20	California Academy of Sciences	Anochetus	Anochetus madagascarensis	Brian Fisher	bfisher@calacademy.org	B.L. Fisher et al.	19-Apr-2006	Madagascar	Fianarantsoa		Mahabo 20	Reserve Forestiere d'Agnalazaha, Mahabo, 42.9 km 215° Farafangana	-23.194	47.723	20	ex rotten log|littoral rainforest|1l|BOX-1229|http://www.antweb.org/specimen.do?name=CASENT0071202-D02
ASAMX738-06	CASENT0071203-D01	BLF13839	EF610791				Anochetus madagascarensis	657	19-Apr-2006	Mahabo 20	California Academy of Sciences	Anochetus	Anochetus madagascarensis	Brian Fisher	bfisher@calacademy.org	B.L. Fisher et al.	19-Apr-2006	Madagascar	Fianarantsoa		Mahabo 20	Reserve Forestiere d'Agnalazaha, Mahabo, 42.9 km 215° Farafangana	-23.194	47.723	20	ex rotten log|littoral rainforest|1w|BOX-1229|http://www.antweb.org/specimen.do?name=CASENT0071203-D01
ASAMX739-06	CASENT0071203-D02	BLF13839	EF610793				Anochetus madagascarensis	657	19-Apr-2006	Mahabo 20	California Academy of Sciences	Anochetus	Anochetus madagascarensis	Brian Fisher	bfisher@calacademy.org	B.L. Fisher et al.	19-Apr-2006	Madagascar	Fianarantsoa		Mahabo 20	Reserve Forestiere d'Agnalazaha, Mahabo, 42.9 km 215° Farafangana	-23.194	47.723	20	ex rotten log|littoral rainforest|1l|BOX-1229|http://www.antweb.org/specimen.do?name=CASENT0071203-D02
ASAMX740-06	CASENT0071204-D01	BLF13912	EF610795				Anochetus madagascarensis	657	19-Apr-2006	Mahabo 20	California Academy of Sciences	Anochetus	Anochetus madagascarensis	Brian Fisher	bfisher@calacademy.org	B.L. Fisher et al.	19-Apr-2006	Madagascar	Fianarantsoa		Mahabo 20	Reserve Forestiere d'Agnalazaha, Mahabo, 42.9 km 215° Farafangana	-23.194	47.723	20	under rotten log|littoral rainforest|1w|BOX-1229|http://www.antweb.org/specimen.do?name=CASENT0071204-D01
ASAMX741-06	CASENT0071204-D02	BLF13912	EF610796				Anochetus madagascarensis	657	19-Apr-2006	Mahabo 20	California Academy of Sciences	Anochetus	Anochetus madagascarensis	Brian Fisher	bfisher@calacademy.org	B.L. Fisher et al.	19-Apr-2006	Madagascar	Fianarantsoa		Mahabo 20	Reserve Forestiere d'Agnalazaha, Mahabo, 42.9 km 215° Farafangana	-23.194	47.723	20	under rotten log|littoral rainforest|1l|BOX-1229|http://www.antweb.org/specimen.do?name=CASENT0071204-D02
ASAMX742-06	CASENT0071205-D01	BLF13829	EF610798				Anochetus madagascarensis	657	19-Apr-2006	Mahabo 20	California Academy of Sciences	Anochetus	Anochetus madagascarensis	Brian Fisher	bfisher@calacademy.org	B.L. Fisher et al.	19-Apr-2006	Madagascar	Fianarantsoa		Mahabo 20	Reserve Forestiere d'Agnalazaha, Mahabo, 42.9 km 215° Farafangana	-23.194	47.723	20	ex rotten log|littoral rainforest|1w|BOX-1229|http://www.antweb.org/specimen.do?name=CASENT0071205-D01
ASAMX743-06	CASENT0071205-D02	BLF13829	EF610799				Anochetus madagascarensis	657	19-Apr-2006	Mahabo 20	California Academy of Sciences	Anochetus	Anochetus madagascarensis	Brian Fisher	bfisher@calacademy.org	B.L. Fisher et al.	19-Apr-2006	Madagascar	Fianarantsoa		Mahabo 20	Reserve Forestiere d'Agnalazaha, Mahabo, 42.9 km 215° Farafangana	-23.194	47.723	20	ex rotten log|littoral rainforest|1l|BOX-1229|http://www.antweb.org/specimen.do?name=CASENT0071205-D02
ASAMX744-06	CASENT0071206-D01	BLF13833	EF610801				Anochetus madagascarensis	655	19-Apr-2006	Mahabo 20	California Academy of Sciences	Anochetus	Anochetus madagascarensis	Brian Fisher	bfisher@calacademy.org	B.L. Fisher et al.	19-Apr-2006	Madagascar	Fianarantsoa		Mahabo 20	Reserve Forestiere d'Agnalazaha, Mahabo, 42.9 km 215° Farafangana	-23.194	47.723	20	under moss on rotten log|littoral rainforest|1w|BOX-1229|http://www.antweb.org/specimen.do?name=CASENT0071206-D01
ASAMX745-06	CASENT0071207-D01	BLF13856	EF610803				Anochetus madagascarensis	657	19-Apr-2006	Mahabo 20	California Academy of Sciences	Anochetus	Anochetus madagascarensis	Brian Fisher	bfisher@calacademy.org	B.L. Fisher et al.	19-Apr-2006	Madagascar	Fianarantsoa		Mahabo 20	Reserve Forestiere d'Agnalazaha, Mahabo, 42.9 km 215° Farafangana	-23.194	47.723	20	under moss, on ground|littoral rainforest|1w|BOX-1229|http://www.antweb.org/specimen.do?name=CASENT0071207-D01
ASAMX746-06	CASENT0071208-D01	BLF13867	EF610776				Anochetus madagascarensis	657	19-Apr-2006	Mahabo 20	California Academy of Sciences	Anochetus	Anochetus madagascarensis	Brian Fisher	bfisher@calacademy.org	B.L. Fisher et al.	19-Apr-2006	Madagascar	Fianarantsoa		Mahabo 20	Reserve Forestiere d'Agnalazaha, Mahabo, 42.9 km 215° Farafangana	-23.194	47.723	20	ex rotting tree stump|littoral rainforest|1w|BOX-1229|http://www.antweb.org/specimen.do?name=CASENT0071208-D01
ASAMX747-06	CASENT0071214-D01	BLF13834	EF610669				Anochetus grandidieri	657	19-Apr-2006	Mahabo 20	California Academy of Sciences	Anochetus	Anochetus grandidieri	Brian Fisher	bfisher@calacademy.org	B.L. Fisher et al.	19-Apr-2006	Madagascar	Fianarantsoa		Mahabo 20	Reserve Forestiere d'Agnalazaha, Mahabo, 42.9 km 215° Farafangana	-23.194	47.723	20	ex rotten log|littoral rainforest|1w|BOX-1229|http://www.antweb.org/specimen.do?name=CASENT0071214-D01
ASAMX773-06	CASENT0071449-D01	BLF13731	EF610682				Anochetus grandidieri	657	14-Apr-2006	Tsaranoro 950	California Academy of Sciences	Anochetus	Anochetus grandidieri	Brian Fisher	bfisher@calacademy.org	B.L. Fisher et al.	14-Apr-2006	Madagascar	Fianarantsoa		Tsaranoro 950	Tsaranoro, 32.8 km 229° Ambalavao	-22.085	46.776	950	ex rotten log|rainforest|1w|BOX-1229|http://www.antweb.org/specimen.do?name=CASENT0071449-D01
ASAMX779-06	CASENT0071513-D01	BLF13981	EF610779				Anochetus madagascarensis	657	21-Apr-2006	Manombo 30	California Academy of Sciences	Anochetus	Anochetus madagascarensis	Brian Fisher	bfisher@calacademy.org	B.L. Fisher et al.	21-Apr-2006	Madagascar	Fianarantsoa		Manombo 30	Reserve Speciale Manombo 24.5 km 228° Farafangana	-23.016	47.719	30	ex rotten log|rainforest|1w|BOX-1229|http://www.antweb.org/specimen.do?name=CASENT0071513-D01
ASAMX780-06	CASENT0071514-D01	BLF13984	EF610780				Anochetus madagascarensis	657	21-Apr-2006	Manombo 30	California Academy of Sciences	Anochetus	Anochetus madagascarensis	Brian Fisher	bfisher@calacademy.org	B.L. Fisher et al.	21-Apr-2006	Madagascar	Fianarantsoa		Manombo 30	Reserve Speciale Manombo 24.5 km 228° Farafangana	-23.016	47.719	30	ex rotten log|rainforest|1w|BOX-1229|http://www.antweb.org/specimen.do?name=CASENT0071514-D01
ASAMX781-06	CASENT0071515-D01	BLF14101	EF610781				Anochetus madagascarensis	657	22-Apr-2006	Manombo 30	California Academy of Sciences	Anochetus	Anochetus madagascarensis	Brian Fisher	bfisher@calacademy.org	B.L. Fisher et al.	22-Apr-2006	Madagascar	Fianarantsoa		Manombo 30	Reserve Speciale Manombo 24.5 km 228° Farafangana	-23.016	47.719	30	ex rotten log|rainforest|1w|BOX-1229|http://www.antweb.org/specimen.do?name=CASENT0071515-D01
ASAMX782-06	CASENT0071516-D01	BLF14009	EF610787				Anochetus madagascarensis	657	21-Apr-2006	Manombo 30	California Academy of Sciences	Anochetus	Anochetus madagascarensis	Brian Fisher	bfisher@calacademy.org	B.L. Fisher et al.	21-Apr-2006	Madagascar	Fianarantsoa		Manombo 30	Reserve Speciale Manombo 24.5 km 228° Farafangana	-23.016	47.719	30	ex rotten log|rainforest|1w|BOX-1229|http://www.antweb.org/specimen.do?name=CASENT0071516-D01
ASAMX783-06	CASENT0071517-D01	BLF14037	EF610792				Anochetus madagascarensis	595	21-Apr-2006	Manombo 30	California Academy of Sciences	Anochetus	Anochetus madagascarensis	Brian Fisher	bfisher@calacademy.org	B.L. Fisher et al.	21-Apr-2006	Madagascar	Fianarantsoa		Manombo 30	Reserve Speciale Manombo 24.5 km 228° Farafangana	-23.016	47.719	30	ex rotten log|rainforest|1w|BOX-1229|http://www.antweb.org/specimen.do?name=CASENT0071517-D01
ASAMX785-06	CASENT0071519-D01	BLF14098	EF610794				Anochetus madagascarensis	590	22-Apr-2006	Manombo 30	California Academy of Sciences	Anochetus	Anochetus madagascarensis	Brian Fisher	bfisher@calacademy.org	B.L. Fisher et al.	22-Apr-2006	Madagascar	Fianarantsoa		Manombo 30	Reserve Speciale Manombo 24.5 km 228° Farafangana	-23.016	47.719	30	ex rotten log|rainforest|1w|BOX-1229|http://www.antweb.org/specimen.do?name=CASENT0071519-D01
ASAMX793-06	CASENT0071582-D01	BLF13953	EF610778				Anochetus madagascarensis	657	20-Apr-2006	Mahabo 20	California Academy of Sciences	Anochetus	Anochetus madagascarensis	Brian Fisher	bfisher@calacademy.org	B.L. Fisher et al.	20-Apr-2006	Madagascar	Fianarantsoa		Mahabo 20	Reserve Forestiere d'Agnalazaha, Mahabo, 42.9 km 215° Farafangana	-23.194	47.723	20	ex rotten log|littoral rainforest|1w|BOX-1229|http://www.antweb.org/specimen.do?name=CASENT0071582-D01
ASAMX796-06	CASENT0071590-D01	BLF13946	EF610783				Anochetus madagascarensis	593	20-Apr-2006	Mahabo 20	California Academy of Sciences	Anochetus	Anochetus madagascarensis	Brian Fisher	bfisher@calacademy.org	B.L. Fisher et al.	20-Apr-2006	Madagascar	Fianarantsoa		Mahabo 20	Reserve Forestiere d'Agnalazaha, Mahabo, 42.9 km 215° Farafangana	-23.194	47.723	20	ex rotten log|littoral rainforest|1w|BOX-1229|http://www.antweb.org/specimen.do?name=CASENT0071590-D01
ASAMX798-06	CASENT0071599-D01	BLF13980	EF610790				Anochetus madagascarensis	631	21-Apr-2006	Manombo 30	California Academy of Sciences	Anochetus	Anochetus madagascarensis	Brian Fisher	bfisher@calacademy.org	B.L. Fisher et al.	21-Apr-2006	Madagascar	Fianarantsoa		Manombo 30	Reserve Speciale Manombo 24.5 km 228° Farafangana	-23.016	47.719	30	ex rotten log|rainforest|1w|BOX-1229|http://www.antweb.org/specimen.do?name=CASENT0071599-D01
ASAMX804-06	CASENT0071631-D01	BLF14062	EF610800				Anochetus madagascarensis	595	21-Apr-2006	Manombo 30	California Academy of Sciences	Anochetus	Anochetus madagascarensis	Brian Fisher	bfisher@calacademy.org	B.L. Fisher et al.	21-Apr-2006	Madagascar	Fianarantsoa		Manombo 30	Reserve Speciale Manombo 24.5 km 228° Farafangana	-23.016	47.719	30	ex rotten log|rainforest|1w|BOX-1229|http://www.antweb.org/specimen.do?name=CASENT0071631-D01
ASAMX817-06	CASENT0071665-D01	BLF14000	EF610797				Anochetus madagascarensis	657	21-Apr-2006	Manombo 30	California Academy of Sciences	Anochetus	Anochetus madagascarensis	Brian Fisher	bfisher@calacademy.org	B.L. Fisher et al.	21-Apr-2006	Madagascar	Fianarantsoa		Manombo 30	Reserve Speciale Manombo 24.5 km 228° Farafangana	-23.016	47.719	30	ex rotten log|rainforest|1w|BOX-1229|http://www.antweb.org/specimen.do?name=CASENT0071665-D01
ASAMX826-06	CASENT0071690-D01	BLF13991	EF610782				Anochetus madagascarensis	657	21-Apr-2006	Manombo 30	California Academy of Sciences	Anochetus	Anochetus madagascarensis	Brian Fisher	bfisher@calacademy.org	B.L. Fisher et al.	21-Apr-2006	Madagascar	Fianarantsoa		Manombo 30	Reserve Speciale Manombo 24.5 km 228° Farafangana	-23.016	47.719	30	ex rotting tree stump|rainforest|1w|BOX-1229|http://www.antweb.org/specimen.do?name=CASENT0071690-D01
ASAMX827-06	CASENT0071691-D01	BLF13972	EF610785				Anochetus madagascarensis	604	21-Apr-2006	Manombo 30	California Academy of Sciences	Anochetus	Anochetus madagascarensis	Brian Fisher	bfisher@calacademy.org	B.L. Fisher et al.	21-Apr-2006	Madagascar	Fianarantsoa		Manombo 30	Reserve Speciale Manombo 24.5 km 228° Farafangana	-23.016	47.719	30	ex rotten log|rainforest|1w|BOX-1229|http://www.antweb.org/specimen.do?name=CASENT0071691-D01
ASAMX828-06	CASENT0071692-D01	BLF14027	EF610789				Anochetus madagascarensis	657	21-Apr-2006	Manombo 30	California Academy of Sciences	Anochetus	Anochetus madagascarensis	Brian Fisher	bfisher@calacademy.org	B.L. Fisher et al.	21-Apr-2006	Madagascar	Fianarantsoa		Manombo 30	Reserve Speciale Manombo 24.5 km 228° Farafangana	-23.016	47.719	30	ex dead branch above ground|rainforest|1w|BOX-1229|http://www.antweb.org/specimen.do?name=CASENT0071692-D01
ASAMX836-06	CASENT0071737-D01	BLF14344	EF610775				Anochetus madagascarensis	657	25-Apr-2006	Manakara 10	California Academy of Sciences	Anochetus	Anochetus madagascarensis	Brian Fisher	bfisher@calacademy.org	B.L.Fisher et al.	25-Apr-2006	Madagascar	Fianarantsoa		Manakara 10	Manakara	-22.148	48.023	10	ex soil, at base of tree|urban gardens, coastal Casuarina equisetifolia|1w|BOX-1229|http://www.antweb.org/specimen.do?name=CASENT0071737-D01
ASAMX837-06	CASENT0071786-D01	BLF14343	EF610777				Anochetus madagascarensis	657	25-Apr-2006	Manakara 10	California Academy of Sciences	Anochetus	Anochetus madagascarensis	Brian Fisher	bfisher@calacademy.org	B.L.Fisher et al.	25-Apr-2006	Madagascar	Fianarantsoa		Manakara 10	Manakara	-22.148	48.023	10	ex soil, at base of tree|urban gardens, coastal Casuarina equisetifolia|1w|BOX-1229|http://www.antweb.org/specimen.do?name=CASENT0071786-D01
ASAMY283-07	CASENT0071839-D01	BLF12460	EU119696		EU073677		Anochetus grandidieri	657	12-Nov-2005	Mandrisy	California Academy of Sciences	Anochetus	Anochetus grandidieri	Brian Fisher	bfisher@calacademy.org	B.L.Fisher et al.	12-Nov-2005	Madagascar	Toamasina		Mandrisy	Foret d'Analava Mandrisy, 5.9 km 195ºAntanambe	-16.486	49.847	10	sifted litter|littoral rainforest|1w|BOX-1942|http://www.antweb.org/specimen.do?name=CASENT0071839-D01
ASAMY284-07	CASENT0071840-D01	BLF12460	EU119708		EU073678		Anochetus grandidieri	631	12-Nov-2005	Mandrisy	California Academy of Sciences	Anochetus	Anochetus grandidieri	Brian Fisher	bfisher@calacademy.org	B.L.Fisher et al.	12-Nov-2005	Madagascar	Toamasina		Mandrisy	Foret d'Analava Mandrisy, 5.9 km 195ºAntanambe	-16.486	49.847	10	sifted litter|littoral rainforest|1w|BOX-1942|http://www.antweb.org/specimen.do?name=CASENT0071840-D01
JDWAM802-05	CASENT0074488-D01	BLF10502	EF610715				Anochetus grandidieri	657	21-Mar-2004	Analamay 1068	California Academy of Sciences	Anochetus	Anochetus grandidieri	Brian Fisher	bfisher@calacademy.org	Malagasy ant team	21-Mar-2004	Madagascar	Toamasina		Analamay 1068	Analamay	-18.806	48.337	1068	EB09 sifted litter (leaf mold, rotten wood)|montane rainforest|1w|BOX-0167|http://www.antweb.org/specimen.do?name=CASENT0074488-D01
ASAM015-05	CASENT0076275-D01	BLF09651	EF610847	EU041973	EU042049		Anochetus goodmani	657	02-Dec-2003	Binara 375	California Academy of Sciences	Anochetus	Anochetus goodmani	Brian Fisher	bfisher@calacademy.org	B.L.Fisher	02-Dec-2003	Madagascar	Antsiranana, Faritany d'		Binara 375	Foret de Binara, 7.5 km 230° SW Daraina	-13.255	49.617	375	EF11 under stone|tropical dry forest|1w|BOX-0168|http://www.antweb.org/specimen.do?name=CASENT0076275-D01
JDWAM843-05	CASENT0076507-D01	BLF10168	EF610878				Anochetus goodmani	657	13-Dec-2003	Antsahabe 550	California Academy of Sciences	Anochetus	Anochetus goodmani	Brian Fisher	bfisher@calacademy.org	B.L.Fisher	13-Dec-2003	Madagascar	Antsiranana, Faritany d'		Antsahabe 550	Foret d' Antsahabe, 11.4km 275° W Daraina	-13.212	49.557	550	EF11 under stone|tropical dry forest|1w|BOX-0167|http://www.antweb.org/specimen.do?name=CASENT0076507-D01
ASAM018-05	CASENT0076507-D02	BLF10168	EF610854	EU041975	EU042052		Anochetus goodmani	657	13-Dec-2003	Antsahabe 550	California Academy of Sciences	Anochetus	Anochetus goodmani	Brian Fisher	bfisher@calacademy.org	B.L.Fisher	13-Dec-2003	Madagascar	Antsiranana, Faritany d'		Antsahabe 550	Foret d' Antsahabe, 11.4km 275° W Daraina	-13.212	49.557	550	EF11 under stone|tropical dry forest|1w|BOX-0168|http://www.antweb.org/specimen.do?name=CASENT0076507-D02
ASAM016-05	CASENT0076665-D01	BLF10132	EF610850		EU042050		Anochetus goodmani	657	13-Dec-2003	Antsahabe 550	California Academy of Sciences	Anochetus	Anochetus goodmani	Brian Fisher	bfisher@calacademy.org	B.L.Fisher	13-Dec-2003	Madagascar	Antsiranana, Faritany d'		Antsahabe 550	Foret d' Antsahabe, 11.4km 275° W Daraina	-13.212	49.557	550	EF11 under stone|tropical dry forest|1w|BOX-0168|http://www.antweb.org/specimen.do?name=CASENT0076665-D01
ASAM017-05	CASENT0076665-D02	BLF10132	EF610851	EU041974	EU042051		Anochetus goodmani	657	13-Dec-2003	Antsahabe 550	California Academy of Sciences	Anochetus	Anochetus goodmani	Brian Fisher	bfisher@calacademy.org	B.L.Fisher	13-Dec-2003	Madagascar	Antsiranana, Faritany d'		Antsahabe 550	Foret d' Antsahabe, 11.4km 275° W Daraina	-13.212	49.557	550	EF11 under stone|tropical dry forest|1w|BOX-0168|http://www.antweb.org/specimen.do?name=CASENT0076665-D02
ASAM3405-05	CASENT0076928-D01	BLF08871	EF610925				Odontomachus coquereli	656	12-Nov-2003	Marojejy 450	California Academy of Sciences	Odontomachus	Odontomachus coquereli	Brian Fisher	bfisher@calacademy.org	B.L.Fisher et al.	12-Nov-2003	Madagascar	Antsiranana, Faritany d'		Marojejy 450	Parc National de Marojejy, Manantenina River, 28.0 km 38° NE Andapa, 8.2 km 333° NNW Manantenina	-14.437	49.775	450	EC12 ground forager(s)|rainforest|right hind leg of worker|BOX-0588|http://www.antweb.org/specimen.do?name=CASENT0076928-D01
ASAM3406-05	CASENT0076934-D01	BLF08791	EF610928				Odontomachus coquereli	657	12-Nov-2003	Marojejy 450	California Academy of Sciences	Odontomachus	Odontomachus coquereli	Brian Fisher	bfisher@calacademy.org	B.L.Fisher et al.	12-Nov-2003	Madagascar	Antsiranana, Faritany d'		Marojejy 450	Parc National de Marojejy, Manantenina River, 28.0 km 38° NE Andapa, 8.2 km 333° NNW Manantenina	-14.437	49.775	450	EC10 ex rotten branch on ground|rainforest|right hind leg of worker|BOX-0588|http://www.antweb.org/specimen.do?name=CASENT0076934-D01
ASAM3410-05	CASENT0077046-D01	BLF08797	EF610947				Odontomachus coquereli	607	12-Nov-2003	Marojejy 450	California Academy of Sciences	Odontomachus	Odontomachus coquereli	Brian Fisher	bfisher@calacademy.org	B.L.Fisher et al.	12-Nov-2003	Madagascar	Antsiranana, Faritany d'		Marojejy 450	Parc National de Marojejy, Manantenina River, 28.0 km 38° NE Andapa, 8.2 km 333° NNW Manantenina	-14.437	49.775	450	EC10 ex rotten branch on ground|rainforest|right hind leg of worker|BOX-0588|http://www.antweb.org/specimen.do?name=CASENT0077046-D01
JDWAM803-05	CASENT0077410-D01	BLF09685	EF610717				Anochetus grandidieri	657	03-Dec-2003	Binara 650-800	California Academy of Sciences	Anochetus	Anochetus grandidieri	Brian Fisher	bfisher@calacademy.org	B.L.Fisher	03-Dec-2003	Madagascar	Antsiranana, Faritany d'		Binara 650-800	Foret de Binara, 9.1km 233° SW Daraina	-13.263	49.603	725	EC18 ground nest|rainforest|2w|BOX-0167|http://www.antweb.org/specimen.do?name=CASENT0077410-D01
ASAM878-05	CASENT0095663-D01	ANTC2678	EF610899				Odontomachus coquereli	638	01-Aug-1995	Mahavelona (Foulpointe)	California Academy of Sciences	Odontomachus	Odontomachus coquereli	Brian Fisher	bfisher@calacademy.org	A. Pauly	01-Aug-1995	Madagascar	Toamasina		Mahavelona (Foulpointe)	Mahavelona (Foulpointe)	-17.667	49.5		sifting litter|sandy forest|right hind leg of worker|BOX-0422|http://www.antweb.org/specimen.do?name=CASENT0095663-D01
ASAM3542-05	CASENT0095663-D02	ANTC2678	EF610931				Odontomachus coquereli	627	01-Aug-1995	Mahavelona (Foulpointe)	California Academy of Sciences	Odontomachus	Odontomachus coquereli	Brian Fisher	bfisher@calacademy.org	A. Pauly	01-Aug-1995	Madagascar	Toamasina		Mahavelona (Foulpointe)	Mahavelona (Foulpointe)	-17.667	49.5		sifting litter|sandy forest|right hind leg of worker|BOX-0588|http://www.antweb.org/specimen.do?name=CASENT0095663-D02
ASAM3544-05	CASENT0096411-D01	ANTC2632	EF611011				Odontomachus troglodytes	246	01-Nov-1994	Antseranambe	California Academy of Sciences	Odontomachus	Odontomachus troglodytes	Brian Fisher	bfisher@calacademy.org	ORSTROM	01-Nov-1994	Madagascar	Toamasina		Antseranambe	Rianila Bassin, Riv: Rianila (Ivohitra), Antseranambe				taken at light at night||right hind leg of male|BOX-0588|http://www.antweb.org/specimen.do?name=CASENT0096411-D01
ASAM3545-05	CASENT0096412-D01	ANTC2632	EF611012				Odontomachus troglodytes	626	01-Nov-1994	Antseranambe	California Academy of Sciences	Odontomachus	Odontomachus troglodytes	Brian Fisher	bfisher@calacademy.org	ORSTROM	01-Nov-1994	Madagascar	Toamasina		Antseranambe	Rianila Bassin, Riv: Rianila (Ivohitra), Antseranambe				taken at light at night||right hind leg of male|BOX-0588|http://www.antweb.org/specimen.do?name=CASENT0096412-D01
ASAM3546-05	CASENT0096670-D01	ANTC2631	EF611013				Odontomachus troglodytes	419	31-Oct-1994	Ambodifaho	California Academy of Sciences	Odontomachus	Odontomachus troglodytes	Brian Fisher	bfisher@calacademy.org	ORSTROM	31-Oct-1994	Madagascar			Ambodifaho	Rianila Bassin, Riv: Rongaronga, Ambodifaho				taken at light at night||right hind leg of male|BOX-0588|http://www.antweb.org/specimen.do?name=CASENT0096670-D01
ASAM3547-05	CASENT0096671-D01	ANTC2631	EF611014				Odontomachus troglodytes	626	31-Oct-1994	Ambodifaho	California Academy of Sciences	Odontomachus	Odontomachus troglodytes	Brian Fisher	bfisher@calacademy.org	ORSTROM	31-Oct-1994	Madagascar			Ambodifaho	Rianila Bassin, Riv: Rongaronga, Ambodifaho				taken at light at night||right hind leg of male|BOX-0588|http://www.antweb.org/specimen.do?name=CASENT0096671-D01
ASAM3548-05	CASENT0096818-D01	ANTC2650	EF611016				Odontomachus troglodytes	622	18-Jan-1996	Gri-gri	California Academy of Sciences	Odontomachus	Odontomachus troglodytes	Brian Fisher	bfisher@calacademy.org	ORSTROM	18-Jan-1996	Madagascar	Toamasina		Gri-gri	Rianila Bassin, Riv: Ilazana, Gri-gri	-18.982	48.611		taken at light at night||right hind leg of male|BOX-0588|http://www.antweb.org/specimen.do?name=CASENT0096818-D01
ASAM3550-05	CASENT0097637-D01	ANTC2634	EF611019				Odontomachus troglodytes	579	05-Nov-1994	Ampasipotsy	California Academy of Sciences	Odontomachus	Odontomachus troglodytes	Brian Fisher	bfisher@calacademy.org	ORSTROM	05-Nov-1994	Madagascar	Antananarivo		Ampasipotsy	Rianila Bassin, Riv: Santaravina, Ampasipotsy-pont routier				taken at light at night||right hind leg of male|BOX-0588|http://www.antweb.org/specimen.do?name=CASENT0097637-D01
ASAM3552-05	CASENT0097641-D01	ANTC2635	EF611021				Odontomachus troglodytes	618	05-Nov-1994	Tanambao	California Academy of Sciences	Odontomachus	Odontomachus troglodytes	Brian Fisher	bfisher@calacademy.org	ORSTROM	05-Nov-1994	Madagascar			Tanambao	Rianila Bassin, Riv: Sandragniro, Tanambao-Pont routier				taken at light at night||right hind leg of male|BOX-0588|http://www.antweb.org/specimen.do?name=CASENT0097641-D01
ASAM3553-05	CASENT0097972-D01	ANTC2628	EF611022				Odontomachus troglodytes	414	28-Oct-1993	Ranomafana RN2	California Academy of Sciences	Odontomachus	Odontomachus troglodytes	Brian Fisher	bfisher@calacademy.org	ORSTROM	28-Oct-1993	Madagascar			Ranomafana RN2	Rianila Bassin, Riv: Ranomafana Aff. de laroka, Ranomafana RN2				taken at light at night||right hind leg of male|BOX-0588|http://www.antweb.org/specimen.do?name=CASENT0097972-D01
ASAM3554-05	CASENT0097973-D01	ANTC2628	EF611023				Odontomachus troglodytes	627	28-Oct-1993	Ranomafana RN2	California Academy of Sciences	Odontomachus	Odontomachus troglodytes	Brian Fisher	bfisher@calacademy.org	ORSTROM	28-Oct-1993	Madagascar			Ranomafana RN2	Rianila Bassin, Riv: Ranomafana Aff. de laroka, Ranomafana RN2				taken at light at night||right hind leg of male|BOX-0588|http://www.antweb.org/specimen.do?name=CASENT0097973-D01
ASAM030-05	CASENT0104543-D01	BLF10362	EF610846	EU041986			Anochetus goodmani	656	16-Dec-2003	Andavakoera 425	California Academy of Sciences	Anochetus	Anochetus goodmani	Brian Fisher	bfisher@calacademy.org	B.L.Fisher	16-Dec-2003	Madagascar	Antsiranana, Faritany d'		Andavakoera 425	Foret d' Andavakoera, 21.4km 75° ENE Ambilobe; 4.6km 356° N Betsiaka	-13.118	49.23	425	EC11 under stone|rainforest|1p|BOX-0168|http://www.antweb.org/specimen.do?name=CASENT0104543-D01
ASAM031-05	CASENT0104543-D02	BLF10362	EF610848	EU041987	EU042069		Anochetus goodmani	656	16-Dec-2003	Andavakoera 425	California Academy of Sciences	Anochetus	Anochetus goodmani	Brian Fisher	bfisher@calacademy.org	B.L.Fisher	16-Dec-2003	Madagascar	Antsiranana, Faritany d'		Andavakoera 425	Foret d' Andavakoera, 21.4km 75° ENE Ambilobe; 4.6km 356° N Betsiaka	-13.118	49.23	425	EC11 under stone|rainforest|1p|BOX-0168|http://www.antweb.org/specimen.do?name=CASENT0104543-D02
ASAM3574-05	CASENT0107134-D01	BLF11040	EF610940				Odontomachus coquereli	627	27-Nov-2004	Ambanitaza 240	California Academy of Sciences	Odontomachus	Odontomachus coquereli	Brian Fisher	bfisher@calacademy.org	B.L.Fisher	27-Nov-2004	Madagascar	Antsiranana, Faritany d'		Ambanitaza 240	Foret Ambanitaza, 26.1 km 347° Antalaha	-14.679	50.184	240	EC13 ex rotten log|rainforest|1w|BOX-0588|http://www.antweb.org/specimen.do?name=CASENT0107134-D01
ASAM3579-05	CASENT0107412-D01	BLF11026	EF610953				Odontomachus coquereli	627	27-Nov-2004	Ambanitaza 240	California Academy of Sciences	Odontomachus	Odontomachus coquereli	Brian Fisher	bfisher@calacademy.org	B.L.Fisher	27-Nov-2004	Madagascar	Antsiranana, Faritany d'		Ambanitaza 240	Foret Ambanitaza, 26.1 km 347° Antalaha	-14.679	50.184	240	EC13 ex rotten log|rainforest|1w|BOX-0588|http://www.antweb.org/specimen.do?name=CASENT0107412-D01
JDWAM728-05	CASENT0107810-D01	BLF11692	EF610811				Anochetus madagascarensis	657	13-Dec-2004	Ambohimanga 250	California Academy of Sciences	Anochetus	Anochetus madagascarensis	Brian Fisher	bfisher@calacademy.org	B.L.Fisher	13-Dec-2004	Madagascar	Mahajanga		Ambohimanga 250	Foret Ambohimanga, 26.1 km 314° Mampikony	-15.963	47.438	250	EF13 ex rotten log|tropical dry forest|1w|BOX-0052|http://www.antweb.org/specimen.do?name=CASENT0107810-D01
ASAMI339-07	CASENT0110728-D01	BLF14553	EF999940			EF999940	Odontomachus troglodytes	657	05-Aug-2006	Fenoarivo BB	California Academy of Sciences	Odontomachus	Odontomachus troglodytes	Brian Fisher	bfisher@calacademy.org	B. Blaimer, F.N. Raharimalala	05-Aug-2006	Madagascar	Toamasina		Fenoarivo BB	Fenoarivo, 85.7 km 13° Toamasina	-17.381	49.415	10	ex rotting tree stump|beach/coastal scrub|1w|BOX-1935|http://www.antweb.org/specimen.do?name=CASENT0110728-D01
ASAMI394-07	CASENT0114439-D01	BLF14455	EF999941			EF999941	Odontomachus troglodytes	657	01-Aug-2006	Antetezambaro BB	California Academy of Sciences	Odontomachus	Odontomachus troglodytes	Brian Fisher	bfisher@calacademy.org	B. Blaimer, F.N. Raharimalala	01-Aug-2006	Madagascar	Toamasina		Antetezambaro BB	Antetezambaro, 16.0 km 21° Toamasina	-17.053	49.567	10	ground nest|urban garden|1w|BOX-1935|http://www.antweb.org/specimen.do?name=CASENT0114439-D01
ASAMI399-07	CASENT0114447-D01	BLF14461	EU119737				Odontomachus troglodytes	599	01-Aug-2006	Antetezambaro BB	California Academy of Sciences	Odontomachus	Odontomachus troglodytes	Brian Fisher	bfisher@calacademy.org	B. Blaimer, F.N. Raharimalala	01-Aug-2006	Madagascar	Toamasina		Antetezambaro BB	Antetezambaro, 16.0 km 21° Toamasina	-17.053	49.567	10	ground forager(s)|urban garden|1w|BOX-1935|http://www.antweb.org/specimen.do?name=CASENT0114447-D01
ASAMI404-07	CASENT0114453-D01	BLF14486	EU119736				Odontomachus troglodytes	599	02-Aug-2006	Tanambao Nosibe BB	California Academy of Sciences	Odontomachus	Odontomachus troglodytes	Brian Fisher	bfisher@calacademy.org	B. Blaimer, F.N. Raharimalala	02-Aug-2006	Madagascar	Toamasina		Tanambao Nosibe BB	Tanambao Nosibe, 29.6 km 23° Toamasina	-17.891	49.456	15	ex rot pocket above ground|coastal scrub|1w|BOX-1935|http://www.antweb.org/specimen.do?name=CASENT0114453-D01
ASAMI407-07	CASENT0114458-D01	BLF14482	EU119735				Odontomachus troglodytes	599	02-Aug-2006	Tanambao Nosibe BB	California Academy of Sciences	Odontomachus	Odontomachus troglodytes	Brian Fisher	bfisher@calacademy.org	B. Blaimer, F.N. Raharimalala	02-Aug-2006	Madagascar	Toamasina		Tanambao Nosibe BB	Tanambao Nosibe, 29.6 km 23° Toamasina	-17.891	49.456	15	under moss, above ground|coastal scrub|1w|BOX-1935|http://www.antweb.org/specimen.do?name=CASENT0114458-D01
ASAMI409-07	CASENT0114896-D01	BLF14529	EF999944			EF999944	Odontomachus troglodytes	605	04-Aug-2006	Mahambo BB	California Academy of Sciences	Odontomachus	Odontomachus troglodytes	Brian Fisher	bfisher@calacademy.org	B. Blaimer, F.N. Raharimalala	04-Aug-2006	Madagascar	Toamasina		Mahambo BB	Mahambo, 73.8 km 16° Toamasina	-17.489	49.452	10	ex root mat, ground layer|urban garden|1w|BOX-1936|http://www.antweb.org/specimen.do?name=CASENT0114896-D01
ASAMI410-07	CASENT0114897-D01	BLF14535	EU119734				Odontomachus troglodytes	593	04-Aug-2006	Mahambo BB	California Academy of Sciences	Odontomachus	Odontomachus troglodytes	Brian Fisher	bfisher@calacademy.org	B. Blaimer, F.N. Raharimalala	04-Aug-2006	Madagascar	Toamasina		Mahambo BB	Mahambo, 73.8 km 16° Toamasina	-17.489	49.452	10	ground forager(s)|urban garden|1w|BOX-1936|http://www.antweb.org/specimen.do?name=CASENT0114897-D01
ASAMI428-07	CASENT0114915-D01	BLF14556	EF999945			EF999945	Odontomachus troglodytes	657	05-Aug-2006	Fenoarivo BB	California Academy of Sciences	Odontomachus	Odontomachus troglodytes	Brian Fisher	bfisher@calacademy.org	B. Blaimer, F.N. Raharimalala	05-Aug-2006	Madagascar	Toamasina		Fenoarivo BB	Fenoarivo, 85.7 km 13° Toamasina	-17.381	49.415	10	ex root mat, ground layer|beach/coastal scrub|1w|BOX-1935|http://www.antweb.org/specimen.do?name=CASENT0114915-D01
ASAMI452-07	CASENT0116067-D01	BLF14472	EU119738				Odontomachus troglodytes	599	02-Aug-2006	Tanambao Nosibe BB	California Academy of Sciences	Odontomachus	Odontomachus troglodytes	Brian Fisher	bfisher@calacademy.org	B. Blaimer, F.N. Raharimalala	02-Aug-2006	Madagascar	Toamasina		Tanambao Nosibe BB	Tanambao Nosibe, 29.6 km 23° Toamasina	-17.891	49.456	15	ex root mat, ground layer|urban garden|1w|BOX-1935|http://www.antweb.org/specimen.do?name=CASENT0116067-D01
ASAMI456-07	CASENT0116074-D01	BLF14501	EF999942			EF999942	Odontomachus troglodytes	657	02-Aug-2006	Antaratasy BB	California Academy of Sciences	Odontomachus	Odontomachus troglodytes	Brian Fisher	bfisher@calacademy.org	B. Blaimer, F.N. Raharimalala	02-Aug-2006	Madagascar	Toamasina		Antaratasy BB	Antaratasy, 43.5 km 23° Toamasina	-17.767	49.478	15	ex root mat, ground layer|urban garden|1w|BOX-1935|http://www.antweb.org/specimen.do?name=CASENT0116074-D01
ASAMI457-07	CASENT0116075-D01	BLF14495	EF999943			EF999943	Odontomachus troglodytes	657	02-Aug-2006	Antaratasy BB	California Academy of Sciences	Odontomachus	Odontomachus troglodytes	Brian Fisher	bfisher@calacademy.org	B. Blaimer, F.N. Raharimalala	02-Aug-2006	Madagascar	Toamasina		Antaratasy BB	Antaratasy, 43.5 km 23° Toamasina	-17.767	49.478	15	ex root mat, ground layer|urban garden|1w|BOX-1935|http://www.antweb.org/specimen.do?name=CASENT0116075-D01
ASAMI483-07	CASENT0116107-D01	BLF14521	EU119744				Odontomachus troglodytes	578	03-Aug-2006	Ambalahasina BB	California Academy of Sciences	Odontomachus	Odontomachus troglodytes	Brian Fisher	bfisher@calacademy.org	B. Blaimer, F.N. Raharimalala	03-Aug-2006	Madagascar	Toamasina		Ambalahasina BB	Ambalahasina, 62.4 km 19° Toamasina	-17.595	49.468	15	ground forager(s)|coastal scrub|1w|BOX-1935|http://www.antweb.org/specimen.do?name=CASENT0116107-D01
ASAMI490-07	CASENT0116117-D01	BLF14516	EU119743				Odontomachus troglodytes	586	03-Aug-2006	Ambalahasina BB	California Academy of Sciences	Odontomachus	Odontomachus troglodytes	Brian Fisher	bfisher@calacademy.org	B. Blaimer, F.N. Raharimalala	03-Aug-2006	Madagascar	Toamasina		Ambalahasina BB	Ambalahasina, 62.4 km 19° Toamasina	-17.595	49.468	15	ex rot pocket above ground|urban garden|1w|BOX-1935|http://www.antweb.org/specimen.do?name=CASENT0116117-D01
ASAMI491-07	CASENT0116118-D01	BLF14509	EU119742				Odontomachus troglodytes	593	03-Aug-2006	Ambalahasina BB	California Academy of Sciences	Odontomachus	Odontomachus troglodytes	Brian Fisher	bfisher@calacademy.org	B. Blaimer, F.N. Raharimalala	03-Aug-2006	Madagascar	Toamasina		Ambalahasina BB	Ambalahasina, 62.4 km 19° Toamasina	-17.595	49.468	15	ground forager(s)|urban garden|1w|BOX-1935|http://www.antweb.org/specimen.do?name=CASENT0116118-D01
ASAMI503-07	CASENT0118184-D01	BLF14574	EU119741				Odontomachus troglodytes	599	06-Aug-2006	Ampasina-Maningory BB	California Academy of Sciences	Odontomachus	Odontomachus troglodytes	Brian Fisher	bfisher@calacademy.org	B. Blaimer, F.N. Raharimalala	06-Aug-2006	Madagascar	Toamasina		Ampasina-Maningory BB	Ampasina-Maningory, 104 km 13° Toamasina	-17.215	49.406	20	ex rotten log|urban garden|1w|BOX-1936|http://www.antweb.org/specimen.do?name=CASENT0118184-D01
ASAMI504-07	CASENT0118186-D01	BLF14577	EF999925			EF999925	Anochetus madagascarensis	657	06-Aug-2006	Ampasina-Maningory BB	California Academy of Sciences	Anochetus	Anochetus madagascarensis	Brian Fisher	bfisher@calacademy.org	B. Blaimer, F.N. Raharimalala	06-Aug-2006	Madagascar	Toamasina		Ampasina-Maningory BB	Ampasina-Maningory, 104 km 13° Toamasina	-17.215	49.406	20	on tree trunk|urban garden|1w|BOX-1936|http://www.antweb.org/specimen.do?name=CASENT0118186-D01
ASAMI511-07	CASENT0118195-D01	BLF14576	EF999926			EF999926	Anochetus madagascarensis	657	06-Aug-2006	Ampasina-Maningory BB	California Academy of Sciences	Anochetus	Anochetus madagascarensis	Brian Fisher	bfisher@calacademy.org	B. Blaimer, F.N. Raharimalala	06-Aug-2006	Madagascar	Toamasina		Ampasina-Maningory BB	Ampasina-Maningory, 104 km 13° Toamasina	-17.215	49.406	20	on tree trunk|urban garden|1w|BOX-1936|http://www.antweb.org/specimen.do?name=CASENT0118195-D01
ASAMI518-07	CASENT0118203-D01	BLF14585	EU119740				Odontomachus troglodytes	593	07-Aug-2006	Ampasimbe BB	California Academy of Sciences	Odontomachus	Odontomachus troglodytes	Brian Fisher	bfisher@calacademy.org	B. Blaimer, F.N. Raharimalala	07-Aug-2006	Madagascar	Toamasina		Ampasimbe BB	Ampasimbe, 118 km 17° Toamasina	-17.093	49.478	25	ex root mat, ground layer|urban garden|1w|BOX-1936|http://www.antweb.org/specimen.do?name=CASENT0118203-D01
ASAMI519-07	CASENT0118204-D01	BLF14580	EU119739				Odontomachus troglodytes	600	07-Aug-2006	Ampasimbe BB	California Academy of Sciences	Odontomachus	Odontomachus troglodytes	Brian Fisher	bfisher@calacademy.org	B. Blaimer, F.N. Raharimalala	07-Aug-2006	Madagascar	Toamasina		Ampasimbe BB	Ampasimbe, 118 km 17° Toamasina	-17.093	49.478	25	ground forager(s)|urban garden|1w|BOX-1936|http://www.antweb.org/specimen.do?name=CASENT0118204-D01
ASAMY005-07	CASENT0118221-D01	BLF14601	EU119745				Odontomachus troglodytes	657	08-Aug-2006	Anosintany BB	California Academy of Sciences	Odontomachus	Odontomachus troglodytes	Brian Fisher	bfisher@calacademy.org	B. Blaimer, F.N. Raharimalala	08-Aug-2006	Madagascar	Toamasina		Anosintany BB	Anosintany, 139 km 21° Toamasina	-16.911	49.589	10	ex rotting tree stump|coastal scrub|1w|BOX-1935|http://www.antweb.org/specimen.do?name=CASENT0118221-D01
ASAMY368-07	CASENT0119086-D01	BLF14819	EU119682		EU073679		Anochetus grandidieri	657	14-Nov-2006	Papango 940	California Academy of Sciences	Anochetus	Anochetus grandidieri	Brian Fisher	bfisher@calacademy.org	B.L.Fisher et al.	14-Nov-2006	Madagascar	Fianarantsoa		Papango 940	Parc National Befotaka-Midongy, Papango 27.7km S Midongy-Sud, Mount Papango	-23.835	46.964	940	ex rotten log|rainforest|1w|BOX-1943|http://www.antweb.org/specimen.do?name=CASENT0119086-D01
ASAMY369-07	CASENT0119087-D01	BLF14833	EU119684		EU073680		Anochetus grandidieri	657	14-Nov-2006	Papango 940	California Academy of Sciences	Anochetus	Anochetus grandidieri	Brian Fisher	bfisher@calacademy.org	B.L.Fisher et al.	14-Nov-2006	Madagascar	Fianarantsoa		Papango 940	Parc National Befotaka-Midongy, Papango 27.7km S Midongy-Sud, Mount Papango	-23.835	46.964	940	ex rotten log|rainforest|1w|BOX-1943|http://www.antweb.org/specimen.do?name=CASENT0119087-D01
ASAMY370-07	CASENT0119088-D01	BLF14825	EU119712				Anochetus grandidieri	620	14-Nov-2006	Papango 940	California Academy of Sciences	Anochetus	Anochetus grandidieri	Brian Fisher	bfisher@calacademy.org	B.L.Fisher et al.	14-Nov-2006	Madagascar	Fianarantsoa		Papango 940	Parc National Befotaka-Midongy, Papango 27.7km S Midongy-Sud, Mount Papango	-23.835	46.964	940	ex rotten log|rainforest|1w|BOX-1943|http://www.antweb.org/specimen.do?name=CASENT0119088-D01
ASAMY374-07	CASENT0119668-D01	BLF14870	EU119693		EU073681		Anochetus grandidieri	657	15-Nov-2006	Papango 940	California Academy of Sciences	Anochetus	Anochetus grandidieri	Brian Fisher	bfisher@calacademy.org	B.L.Fisher et al.	15-Nov-2006	Madagascar	Fianarantsoa		Papango 940	Parc National Befotaka-Midongy, Papango 27.7km S Midongy-Sud, Mount Papango	-23.835	46.964	940	under rotten log|rainforest|1w|BOX-1943|http://www.antweb.org/specimen.do?name=CASENT0119668-D01
ASAMY375-07	CASENT0119672-D01	BLF14782	EU119694		EU073682		Anochetus grandidieri	657	14-Nov-2006	Papango 940	California Academy of Sciences	Anochetus	Anochetus grandidieri	Brian Fisher	bfisher@calacademy.org	B.L.Fisher et al.	14-Nov-2006	Madagascar	Fianarantsoa		Papango 940	Parc National Befotaka-Midongy, Papango 27.7km S Midongy-Sud, Mount Papango	-23.835	46.964	940	ex rotten log|rainforest|1w|BOX-1943|http://www.antweb.org/specimen.do?name=CASENT0119672-D01
ASAMY376-07	CASENT0119673-D01	BLF14803	EU119695		EU073683		Anochetus grandidieri	657	14-Nov-2006	Papango 940	California Academy of Sciences	Anochetus	Anochetus grandidieri	Brian Fisher	bfisher@calacademy.org	B.L.Fisher et al.	14-Nov-2006	Madagascar	Fianarantsoa		Papango 940	Parc National Befotaka-Midongy, Papango 27.7km S Midongy-Sud, Mount Papango	-23.835	46.964	940	ex rotten log|rainforest|1w|BOX-1943|http://www.antweb.org/specimen.do?name=CASENT0119673-D01
ASAMY392-07	CASENT0120030-D01	BLF15651	EU119733		EU073684	EU073708	Anochetus madagascarensis	611	05-Dec-2006	Mandena 2006	California Academy of Sciences	Anochetus	Anochetus madagascarensis	Brian Fisher	bfisher@calacademy.org	B.L.Fisher et al.	05-Dec-2006	Madagascar	Toliara		Mandena 2006	Foret Mandena 8.5 km N Tolagnaro	-24.953	47.002	20	ex rotten log|littoral rainforest|1w|BOX-1943|http://www.antweb.org/specimen.do?name=CASENT0120030-D01
ASAMY393-07	CASENT0120031-D01	BLF15224	EU119719				Anochetus madagascarensis	657	24-Nov-2006	Ando Tanatana	California Academy of Sciences	Anochetus	Anochetus madagascarensis	Brian Fisher	bfisher@calacademy.org	B.L.Fisher et al.	24-Nov-2006	Madagascar	Toliara		Ando Tanatana	Parc National Andohahela, Col de Tanatana, 33.3km NW Tolagnaro	-24.758	46.854	275	ex rotten log|rainforest|1w|BOX-1943|http://www.antweb.org/specimen.do?name=CASENT0120031-D01
ASAMY394-07	CASENT0120032-D01	BLF15305	EU119720		EU073685		Anochetus madagascarensis	657	27-Nov-2006	Manatantely 100	California Academy of Sciences	Anochetus	Anochetus madagascarensis	Brian Fisher	bfisher@calacademy.org	B.L.Fisher et al.	27-Nov-2006	Madagascar	Toliara		Manatantely 100	8.9km NW Tolagnaro	-24.982	46.926	100	ex rotten log|rainforest|1w|BOX-1943|http://www.antweb.org/specimen.do?name=CASENT0120032-D01
ASAMY395-07	CASENT0120033-D01	BLF15466	EU119721		EU073686		Anochetus madagascarensis	657	03-Dec-2006	Ivohibe 200	California Academy of Sciences	Anochetus	Anochetus madagascarensis	Brian Fisher	bfisher@calacademy.org	B.L.Fisher et al.	03-Dec-2006	Madagascar	Toliara		Ivohibe 200	Foret Ivohibe 55.0km N Tolagnaro	-24.569	47.204	200	ex rotten log|rainforest|1w|BOX-1943|http://www.antweb.org/specimen.do?name=CASENT0120033-D01
ASAMY396-07	CASENT0120034-D01	BLF15657	EU119722		EU073687	EU073709	Anochetus madagascarensis	657	05-Dec-2006	Mandena 2006	California Academy of Sciences	Anochetus	Anochetus madagascarensis	Brian Fisher	bfisher@calacademy.org	B.L.Fisher et al.	05-Dec-2006	Madagascar	Toliara		Mandena 2006	Foret Mandena 8.5 km N Tolagnaro	-24.953	47.002	20	under rotten log|littoral rainforest|1w|BOX-1943|http://www.antweb.org/specimen.do?name=CASENT0120034-D01
ASAMY397-07	CASENT0120036-D01	BLF15105	EU119731		EU073688		Anochetus madagascarensis	631	22-Nov-2006	Ando Tanatana	California Academy of Sciences	Anochetus	Anochetus madagascarensis	Brian Fisher	bfisher@calacademy.org	B.L.Fisher et al.	22-Nov-2006	Madagascar	Toliara		Ando Tanatana	Parc National Andohahela, Col de Tanatana, 33.3km NW Tolagnaro	-24.758	46.854	275	ex rotten log|rainforest|1w|BOX-1943|http://www.antweb.org/specimen.do?name=CASENT0120036-D01
ASAMY398-07	CASENT0120037-D01	BLF15177	EU119725				Anochetus madagascarensis	657	23-Nov-2006	Ando Tanatana	California Academy of Sciences	Anochetus	Anochetus madagascarensis	Brian Fisher	bfisher@calacademy.org	B.L.Fisher et al.	23-Nov-2006	Madagascar	Toliara		Ando Tanatana	Parc National Andohahela, Col de Tanatana, 33.3km NW Tolagnaro	-24.758	46.854	275	ex rotten log|rainforest|1w|BOX-1943|http://www.antweb.org/specimen.do?name=CASENT0120037-D01
ASAMY399-07	CASENT0120038-D01	BLF15174	EU119726		EU073689		Anochetus madagascarensis	657	23-Nov-2006	Ando Tanatana	California Academy of Sciences	Anochetus	Anochetus madagascarensis	Brian Fisher	bfisher@calacademy.org	B.L.Fisher et al.	23-Nov-2006	Madagascar	Toliara		Ando Tanatana	Parc National Andohahela, Col de Tanatana, 33.3km NW Tolagnaro	-24.758	46.854	275	ex dead tree stump|rainforest|1w|BOX-1943|http://www.antweb.org/specimen.do?name=CASENT0120038-D01
ASAMY400-07	CASENT0120039-D01	BLF15543	EU119728		EU073690		Anochetus madagascarensis	657	03-Dec-2006	Ivohibe 200	California Academy of Sciences	Anochetus	Anochetus madagascarensis	Brian Fisher	bfisher@calacademy.org	B.L.Fisher et al.	03-Dec-2006	Madagascar	Toliara		Ivohibe 200	Foret Ivohibe 55.0km N Tolagnaro	-24.569	47.204	200	ex rotten log|rainforest|1w|BOX-1943|http://www.antweb.org/specimen.do?name=CASENT0120039-D01
ASAMY401-07	CASENT0120040-D01	BLF15419	EU119716		EU073691	EU073710	Anochetus madagascarensis	657	01-Dec-2006	Libanona 2006	California Academy of Sciences	Anochetus	Anochetus madagascarensis	Brian Fisher	bfisher@calacademy.org	B.L.Fisher et al.	01-Dec-2006	Madagascar	Toliara		Libanona 2006	Libanona beach, Tolagnaro	-25.039	46.996	20	under stone|coastal scrub|1w|BOX-1943|http://www.antweb.org/specimen.do?name=CASENT0120040-D01
ASAMY402-07	CASENT0120041-D01	BLF15430	EU119732				Anochetus madagascarensis	630	01-Dec-2006	Libanona 2006	California Academy of Sciences	Anochetus	Anochetus madagascarensis	Brian Fisher	bfisher@calacademy.org	B.L.Fisher et al.	01-Dec-2006	Madagascar	Toliara		Libanona 2006	Libanona beach, Tolagnaro	-25.039	46.996	20	on low vegetation, trunk of Australiana pine|coastal scrub|1w|BOX-1943|http://www.antweb.org/specimen.do?name=CASENT0120041-D01
ASAMY403-07	CASENT0120044-D01	BLF15447	EU119713				Anochetus madagascarensis	657	01-Dec-2006	Libanona 2006	California Academy of Sciences	Anochetus	Anochetus madagascarensis	Brian Fisher	bfisher@calacademy.org	B.L.Fisher et al.	01-Dec-2006	Madagascar	Toliara		Libanona 2006	Libanona beach, Tolagnaro	-25.039	46.996	20	on tree trunk, Australiana pine|coastal scrub|1w|BOX-1943|http://www.antweb.org/specimen.do?name=CASENT0120044-D01
ASAMY404-07	CASENT0120045-D01	BLF15299	EU119705		EU073692		Anochetus grandidieri	631	27-Nov-2006	Manatantely 100	California Academy of Sciences	Anochetus	Anochetus grandidieri	Brian Fisher	bfisher@calacademy.org	B.L.Fisher et al.	27-Nov-2006	Madagascar	Toliara		Manatantely 100	8.9km NW Tolagnaro	-24.982	46.926	100	ex rotten log|rainforest|1w|BOX-1943|http://www.antweb.org/specimen.do?name=CASENT0120045-D01
ASAMY416-07	CASENT0120194-D01	BLF15315	EU119723		EU073693		Anochetus madagascarensis	657	27-Nov-2006	Manatantely 100	California Academy of Sciences	Anochetus	Anochetus madagascarensis	Brian Fisher	bfisher@calacademy.org	B.L.Fisher et al.	27-Nov-2006	Madagascar	Toliara		Manatantely 100	8.9km NW Tolagnaro	-24.982	46.926	100	ex rotten log|rainforest|1w|BOX-1943|http://www.antweb.org/specimen.do?name=CASENT0120194-D01
ASAMY417-07	CASENT0120195-D01	BLF15140	EU119697		EU073694		Anochetus grandidieri	657	23-Nov-2006	Ando Tanatana	California Academy of Sciences	Anochetus	Anochetus grandidieri	Brian Fisher	bfisher@calacademy.org	B.L.Fisher et al.	23-Nov-2006	Madagascar	Toliara		Ando Tanatana	Parc National Andohahela, Col de Tanatana, 33.3km NW Tolagnaro	-24.758	46.854	275	under stone|rainforest|1w|BOX-1943|http://www.antweb.org/specimen.do?name=CASENT0120195-D01
ASAMY418-07	CASENT0120196-D01	BLF15119	EU119710		EU073695		Anochetus grandidieri	626	23-Nov-2006	Ando Tanatana	California Academy of Sciences	Anochetus	Anochetus grandidieri	Brian Fisher	bfisher@calacademy.org	B.L.Fisher et al.	23-Nov-2006	Madagascar	Toliara		Ando Tanatana	Parc National Andohahela, Col de Tanatana, 33.3km NW Tolagnaro	-24.758	46.854	275	under stone|rainforest|1w|BOX-1943|http://www.antweb.org/specimen.do?name=CASENT0120196-D01
ASAMY419-07	CASENT0120197-D01	BLF15110	EU119727		EU073696		Anochetus madagascarensis	657	22-Nov-2006	Ando Tanatana	California Academy of Sciences	Anochetus	Anochetus madagascarensis	Brian Fisher	bfisher@calacademy.org	B.L.Fisher et al.	22-Nov-2006	Madagascar	Toliara		Ando Tanatana	Parc National Andohahela, Col de Tanatana, 33.3km NW Tolagnaro	-24.758	46.854	275	ex rotten log|rainforest|1w|BOX-1943|http://www.antweb.org/specimen.do?name=CASENT0120197-D01
ASAMY420-07	CASENT0120328-D01	BLF15472	EU119729		EU073697		Anochetus madagascarensis	657	03-Dec-2006	Ivohibe 200	California Academy of Sciences	Anochetus	Anochetus madagascarensis	Brian Fisher	bfisher@calacademy.org	B.L.Fisher et al.	03-Dec-2006	Madagascar	Toliara		Ivohibe 200	Foret Ivohibe 55.0km N Tolagnaro	-24.569	47.204	200	ex rotten log|rainforest|1w|BOX-1943|http://www.antweb.org/specimen.do?name=CASENT0120328-D01
ASAMY421-07	CASENT0120329-D01	BLF15353	EU119724		EU073698		Anochetus madagascarensis	657	27-Nov-2006	Manatantely 100	California Academy of Sciences	Anochetus	Anochetus madagascarensis	Brian Fisher	bfisher@calacademy.org	B.L.Fisher et al.	27-Nov-2006	Madagascar	Toliara		Manatantely 100	8.9km NW Tolagnaro	-24.982	46.926	100	ex rotten log|rainforest|1w|BOX-1943|http://www.antweb.org/specimen.do?name=CASENT0120329-D01
ASAMY422-07	CASENT0120330-D01	BLF15532	EU119730		EU073699		Anochetus madagascarensis	656	03-Dec-2006	Ivohibe 200	California Academy of Sciences	Anochetus	Anochetus madagascarensis	Brian Fisher	bfisher@calacademy.org	B.L.Fisher et al.	03-Dec-2006	Madagascar	Toliara		Ivohibe 200	Foret Ivohibe 55.0km N Tolagnaro	-24.569	47.204	200	ex rotten log|rainforest|1w|BOX-1943|http://www.antweb.org/specimen.do?name=CASENT0120330-D01
ASAMY423-07	CASENT0120331-D01	BLF15493	EU119714		EU073700	EU073711	Anochetus madagascarensis	657	03-Dec-2006	Ivohibe 200	California Academy of Sciences	Anochetus	Anochetus madagascarensis	Brian Fisher	bfisher@calacademy.org	B.L.Fisher et al.	03-Dec-2006	Madagascar	Toliara		Ivohibe 200	Foret Ivohibe 55.0km N Tolagnaro	-24.569	47.204	200	ex rotting tree stump|rainforest|1w|BOX-1943|http://www.antweb.org/specimen.do?name=CASENT0120331-D01
ASAMY424-07	CASENT0120332-D01	BLF15409	EU119706		EU073701		Anochetus grandidieri	631	30-Nov-2006	Lavasoa	California Academy of Sciences	Anochetus	Anochetus grandidieri	Brian Fisher	bfisher@calacademy.org	B.L.Fisher et al.	30-Nov-2006	Madagascar	Toliara		Lavasoa	Grand Lavasoa, 25.9km W Tolagnaro	-25.088	46.749	450	ex rotten log|rainforest|1w|BOX-1943|http://www.antweb.org/specimen.do?name=CASENT0120332-D01
ASAMY425-07	CASENT0120333-D01	BLF15391	EU119715		EU073702		Anochetus madagascarensis	657	30-Nov-2006	Lavasoa	California Academy of Sciences	Anochetus	Anochetus madagascarensis	Brian Fisher	bfisher@calacademy.org	B.L.Fisher et al.	30-Nov-2006	Madagascar	Toliara		Lavasoa	Grand Lavasoa, 25.9km W Tolagnaro	-25.088	46.749	450	ex rotten log|rainforest|1w|BOX-1943|http://www.antweb.org/specimen.do?name=CASENT0120333-D01
ASAMY426-07	CASENT0120334-D01	BLF15118	EU119685		EU073703		Anochetus grandidieri	657	23-Nov-2006	Ando Tanatana	California Academy of Sciences	Anochetus	Anochetus grandidieri	Brian Fisher	bfisher@calacademy.org	B.L.Fisher et al.	23-Nov-2006	Madagascar	Toliara		Ando Tanatana	Parc National Andohahela, Col de Tanatana, 33.3km NW Tolagnaro	-24.758	46.854	275	under stone|rainforest|1w|BOX-1943|http://www.antweb.org/specimen.do?name=CASENT0120334-D01
ASAMY427-07	CASENT0120335-D01	BLF15672	EU119717		EU073704		Anochetus madagascarensis	657	05-Dec-2006	Mandena 2006	California Academy of Sciences	Anochetus	Anochetus madagascarensis	Brian Fisher	bfisher@calacademy.org	B.L.Fisher et al.	05-Dec-2006	Madagascar	Toliara		Mandena 2006	Foret Mandena 8.5 km N Tolagnaro	-24.953	47.002	20	ex rotten log|littoral rainforest|1w|BOX-1943|http://www.antweb.org/specimen.do?name=CASENT0120335-D01
ASAMY428-07	CASENT0120336-D01	BLF15530	EU119688		EU073705		Anochetus grandidieri	657	03-Dec-2006	Ivohibe 200	California Academy of Sciences	Anochetus	Anochetus grandidieri	Brian Fisher	bfisher@calacademy.org	B.L.Fisher et al.	03-Dec-2006	Madagascar	Toliara		Ivohibe 200	Foret Ivohibe 55.0km N Tolagnaro	-24.569	47.204	200	under moss, litter on rock|rainforest|1w|BOX-1943|http://www.antweb.org/specimen.do?name=CASENT0120336-D01
ASAMY429-07	CASENT0120337-D01	BLF15186	EU119689		EU073706		Anochetus grandidieri	657	23-Nov-2006	Ando Tanatana	California Academy of Sciences	Anochetus	Anochetus grandidieri	Brian Fisher	bfisher@calacademy.org	B.L.Fisher et al.	23-Nov-2006	Madagascar	Toliara		Ando Tanatana	Parc National Andohahela, Col de Tanatana, 33.3km NW Tolagnaro	-24.758	46.854	275	ex rotten log|rainforest|1w|BOX-1943|http://www.antweb.org/specimen.do?name=CASENT0120337-D01
ASAMY430-07	CASENT0120338-D01	BLF15335	EU119718		EU073707		Anochetus madagascarensis	657	27-Nov-2006	Manatantely 100	California Academy of Sciences	Anochetus	Anochetus madagascarensis	Brian Fisher	bfisher@calacademy.org	B.L.Fisher et al.	27-Nov-2006	Madagascar	Toliara		Manatantely 100	8.9km NW Tolagnaro	-24.982	46.926	100	under rotten log|rainforest|1w|BOX-1943|http://www.antweb.org/specimen.do?name=CASENT0120338-D01
ASAMX868-06	CASENT0172611-D01	ANTC2174	EF610837				Anochetus pattersoni	657	22-Sep-2005	Picard	California Academy of Sciences	Anochetus	Anochetus pattersoni	Brian Fisher	bfisher@calacademy.org	K.Mach & O.Maurel	22-Sep-2005	Seychelles			Picard	Aldabra Islands, Picard				ex malaise trap 6m||right hind leg of male|BOX-1233|http://www.antweb.org/specimen.do?name=CASENT0172611-D01
ASAMX869-06	CASENT0172617-D01	ANTC2175	EF610838				Anochetus pattersoni	593	22-May-2005	Picard	California Academy of Sciences	Anochetus	Anochetus pattersoni	Brian Fisher	bfisher@calacademy.org	K.Mach & O.Maurel	22-May-2005	Seychelles			Picard	Aldabra Islands, Picard				||right hind leg of male|BOX-1233|http://www.antweb.org/specimen.do?name=CASENT0172617-D01
ASAMY064-07	CASENT0172667-D01	JGL1	EF999927			EU042037	Odontomachus simillimus	631	05-Jul-2000	Jardin Marron L1	California Academy of Sciences	Odontomachus	Odontomachus simillimus	Brian Fisher	bfisher@calacademy.org	J.Gerlach	05-Jul-2000	Seychelles			Jardin Marron L1	Silhouette Island, Jardin Marron				||right hind leg of worker|BOX-1938|http://www.antweb.org/specimen.do?name=CASENT0172667-D01
ASAMY065-07	CASENT0172668-D01	RRS1998-55	EF999928			EU042038	Odontomachus simillimus	657	10-Apr-1998	Siewa camp	California Academy of Sciences	Odontomachus	Odontomachus simillimus	Brian Fisher	bfisher@calacademy.org	R.R.Snelling	10-Apr-1998	Indonesia		Irian Jaya	Siewa camp	PT. Freeport Concession, Siewa camp	-3.04	136.38	61	under bark of rotting branch in litter|lowland secondary rainforest|right hind leg of dealate Queen|BOX-1938|http://www.antweb.org/specimen.do?name=CASENT0172668-D01
ASAM937-05	CASENT0400528-D01	BLF04086	EF611009				Odontomachus troglodytes	606	10-May-2001	Sangha 420	California Academy of Sciences	Odontomachus	Odontomachus troglodytes	Brian Fisher	bfisher@calacademy.org	B.L.Fisher	10-May-2001	Central African Republic	Sangha-Mbaere		Sangha 420	Reserve Speciale de Foret Dense de Dzanga-Sangha, 12.7 km 326° NW Bayanga	3.005	16.193	420	EC19 sifted litter|rainforest|1w|BOX-0422|http://www.antweb.org/specimen.do?name=CASENT0400528-D01
ASAM939-05	CASENT0400537-D01	BLF04086	EF610897				Odontomachus assiniensis	623	10-May-2001	Sangha 420	California Academy of Sciences	Odontomachus	Odontomachus assiniensis	Brian Fisher	bfisher@calacademy.org	B.L.Fisher	10-May-2001	Central African Republic	Sangha-Mbaere		Sangha 420	Reserve Speciale de Foret Dense de Dzanga-Sangha, 12.7 km 326° NW Bayanga	3.005	16.193	420	EC19 sifted litter|rainforest|1w|BOX-0422|http://www.antweb.org/specimen.do?name=CASENT0400537-D01
ASAM004-05	CASENT0416372-D01	BLF02959	EF610859	EU041963	EU042042		Anochetus goodmani	617	10-Feb-2001	Ankarana 80	California Academy of Sciences	Anochetus	Anochetus goodmani	Brian Fisher	bfisher@calacademy.org	Fisher, Griswold et al.	10-Feb-2001	Madagascar	Antsiranana, Faritany d'		Ankarana 80	Reserve Speciale de l'Ankarana, 22.9 km 224° SW Anivorano Nord	-12.909	49.11	80	EF18 ground nest|tropical dry forest|1w|BOX-0168|http://www.antweb.org/specimen.do?name=CASENT0416372-D01
ASAM005-05	CASENT0416372-D02	BLF02959	EF610861		EU042043		Anochetus goodmani	657	10-Feb-2001	Ankarana 80	California Academy of Sciences	Anochetus	Anochetus goodmani	Brian Fisher	bfisher@calacademy.org	Fisher, Griswold et al.	10-Feb-2001	Madagascar	Antsiranana, Faritany d'		Ankarana 80	Reserve Speciale de l'Ankarana, 22.9 km 224° SW Anivorano Nord	-12.909	49.11	80	EF18 ground nest|tropical dry forest|1w|BOX-0168|http://www.antweb.org/specimen.do?name=CASENT0416372-D02
ASAM006-05	CASENT0416382-D01	BLF03073	EF610864	EU041964			Anochetus goodmani	632	16-Feb-2001	Ankarana 210	California Academy of Sciences	Anochetus	Anochetus goodmani	Brian Fisher	bfisher@calacademy.org	Fisher, Griswold et al.	16-Feb-2001	Madagascar	Antsiranana, Faritany d'		Ankarana 210	Reserve Speciale de l'Ankarana, 13.6 km 192° SSW Anivorano Nord	-12.864	49.226	210	EF18 ground nest|tropical dry forest|1w|BOX-0168|http://www.antweb.org/specimen.do?name=CASENT0416382-D01
ASAM007-05	CASENT0416382-D02	BLF03073	EF610866	EU041965			Anochetus goodmani	657	16-Feb-2001	Ankarana 210	California Academy of Sciences	Anochetus	Anochetus goodmani	Brian Fisher	bfisher@calacademy.org	Fisher, Griswold et al.	16-Feb-2001	Madagascar	Antsiranana, Faritany d'		Ankarana 210	Reserve Speciale de l'Ankarana, 13.6 km 192° SSW Anivorano Nord	-12.864	49.226	210	EF18 ground nest|tropical dry forest|1w|BOX-0168|http://www.antweb.org/specimen.do?name=CASENT0416382-D02
JDWAM824-05	CASENT0416394-D01	BLF02664	EF610833				Anochetus madagascarensis	657	26-Jan-2001	Sakaramy 325	California Academy of Sciences	Anochetus	Anochetus madagascarensis	Brian Fisher	bfisher@calacademy.org	Fisher, Griswold et al.	26-Jan-2001	Madagascar	Antsiranana, Faritany d'		Sakaramy 325	Reserve Speciale d'Ambre, 3.5 km 235° SW Sakaramy	-12.469	49.242	325	EF13 ex rotten log|tropical dry forest|1w|BOX-0167|http://www.antweb.org/specimen.do?name=CASENT0416394-D01
JDWAM825-05	CASENT0416416-D01	BLF03242	EF610835				Anochetus madagascarensis	657	22-Feb-2001	Orangea 90	California Academy of Sciences	Anochetus	Anochetus madagascarensis	Brian Fisher	bfisher@calacademy.org	Fisher, Griswold et al.	22-Feb-2001	Madagascar	Antsiranana, Faritany d'		Orangea 90	Foret d'Orangea, 3.6 km 128° SE Remena	-12.259	49.375	90	EG13 ex rotten log|littoral rainforest|1w, 1p|BOX-0167|http://www.antweb.org/specimen.do?name=CASENT0416416-D01
JDWAM826-05	CASENT0416418-D01	BLF03257	EF610808				Anochetus madagascarensis	657	04-Mar-2001	Ambilanivy 600	California Academy of Sciences	Anochetus	Anochetus madagascarensis	Brian Fisher	bfisher@calacademy.org	Fisher, Griswold et al.	04-Mar-2001	Madagascar	Antsiranana, Faritany d'		Ambilanivy 600	Ampasindava, Foret d'Ambilanivy, 3.9 km 181° S Ambaliha	-13.799	48.162	600	EC13 ex rotten log|rainforest|1w, 1l|BOX-0167|http://www.antweb.org/specimen.do?name=CASENT0416418-D01
JDWAM827-05	CASENT0416427-D01	BLF03034	EF610809				Anochetus madagascarensis	657	16-Feb-2001	Ankarana 210	California Academy of Sciences	Anochetus	Anochetus madagascarensis	Brian Fisher	bfisher@calacademy.org	Fisher, Griswold et al.	16-Feb-2001	Madagascar	Antsiranana, Faritany d'		Ankarana 210	Reserve Speciale de l'Ankarana, 13.6 km 192° SSW Anivorano Nord	-12.864	49.226	210	EF13 ex rotten log|tropical dry forest|1w, 1p|BOX-0167|http://www.antweb.org/specimen.do?name=CASENT0416427-D01
JDWAM828-05	CASENT0416432-D01	BLF03067	EF610812				Anochetus madagascarensis	657	16-Feb-2001	Ankarana 210	California Academy of Sciences	Anochetus	Anochetus madagascarensis	Brian Fisher	bfisher@calacademy.org	Fisher, Griswold et al.	16-Feb-2001	Madagascar	Antsiranana, Faritany d'		Ankarana 210	Reserve Speciale de l'Ankarana, 13.6 km 192° SSW Anivorano Nord	-12.864	49.226	210	EF25 ex rotting tree stump|tropical dry forest|1w, 1l|BOX-0167|http://www.antweb.org/specimen.do?name=CASENT0416432-D01
JDWAM804-05	CASENT0416435-D01	BLF02572	EF610719				Anochetus grandidieri	419	20-Jan-2001	Ambre 925	California Academy of Sciences	Anochetus	Anochetus grandidieri	Brian Fisher	bfisher@calacademy.org	Fisher, Griswold et al.	20-Jan-2001	Madagascar	Antsiranana, Faritany d'		Ambre 925	Parc National Montagne d'Ambre, 3.6 km 235° SW Joffreville	-12.534	49.18	925	EB03 ex rotten log|montane rainforest|1w|BOX-0167|http://www.antweb.org/specimen.do?name=CASENT0416435-D01
JDWAM829-05	CASENT0425001-D01	BLF03642	EF610814				Anochetus madagascarensis	622	02-Apr-2001	Tsimaloto 135	California Academy of Sciences	Anochetus	Anochetus madagascarensis	Brian Fisher	bfisher@calacademy.org	Fisher, Griswold et al.	02-Apr-2001	Madagascar	Mahajanga		Tsimaloto 135	Parc National d'Ankarafantsika, Foret de Tsimaloto, 18.3 km 46° NE de Tsaramandroso	-16.228	47.144	135	EF13 ex rotten log|tropical dry forest|1w, 1p|BOX-0167|http://www.antweb.org/specimen.do?name=CASENT0425001-D01
JDWAM844-05	CASENT0428100-D01	BLF02860	EF610879				Anochetus goodmani	657	10-Feb-2001	Ankarana 80	California Academy of Sciences	Anochetus	Anochetus goodmani	Brian Fisher	bfisher@calacademy.org	Fisher, Griswold et al.	10-Feb-2001	Madagascar	Antsiranana, Faritany d'		Ankarana 80	Reserve Speciale de l'Ankarana, 22.9 km 224° SW Anivorano Nord	-12.909	49.11	80	EF18 ground nest|tropical dry forest|1w|BOX-0167|http://www.antweb.org/specimen.do?name=CASENT0428100-D01
ASAM001-05	CASENT0428100-D02	BLF02860	EF610849	EU041960	EU042039		Anochetus goodmani	653	10-Feb-2001	Ankarana 80	California Academy of Sciences	Anochetus	Anochetus goodmani	Brian Fisher	bfisher@calacademy.org	Fisher, Griswold et al.	10-Feb-2001	Madagascar	Antsiranana, Faritany d'		Ankarana 80	Reserve Speciale de l'Ankarana, 22.9 km 224° SW Anivorano Nord	-12.909	49.11	80	EF18 ground nest|tropical dry forest|1w|BOX-0168|http://www.antweb.org/specimen.do?name=CASENT0428100-D02
ASAM002-05	CASENT0428105-D01	BLF02878	EF610853	EU041961	EU042040	EU042010	Anochetus goodmani	656	10-Feb-2001	Ankarana 80	California Academy of Sciences	Anochetus	Anochetus goodmani	Brian Fisher	bfisher@calacademy.org	Fisher, Griswold et al.	10-Feb-2001	Madagascar	Antsiranana, Faritany d'		Ankarana 80	Reserve Speciale de l'Ankarana, 22.9 km 224° SW Anivorano Nord	-12.909	49.11	80	EF18 ground nest|tropical dry forest|1w|BOX-0168|http://www.antweb.org/specimen.do?name=CASENT0428105-D01
ASAM003-05	CASENT0428105-D02	BLF02878	EF610856	EU041962	EU042041		Anochetus goodmani	656	10-Feb-2001	Ankarana 80	California Academy of Sciences	Anochetus	Anochetus goodmani	Brian Fisher	bfisher@calacademy.org	Fisher, Griswold et al.	10-Feb-2001	Madagascar	Antsiranana, Faritany d'		Ankarana 80	Reserve Speciale de l'Ankarana, 22.9 km 224° SW Anivorano Nord	-12.909	49.11	80	EF18 ground nest|tropical dry forest|1w|BOX-0168|http://www.antweb.org/specimen.do?name=CASENT0428105-D02
JDWAM830-05	CASENT0430591-D01	BLF04290	EF610816				Anochetus madagascarensis	657	06-Nov-2001	Vazimba 50	California Academy of Sciences	Anochetus	Anochetus madagascarensis	Brian Fisher	bfisher@calacademy.org	Fisher-Griswold Arthropod Team	06-Nov-2001	Madagascar	Mahajanga		Vazimba 50	Parc National Tsingy de Bemaraha, 3.4 km 93° E Bekopaka, Tombeau Vazimba	-19.142	44.828	50	EF13 ex rotten log|tropical dry forest|1w|BOX-0167|http://www.antweb.org/specimen.do?name=CASENT0430591-D01
JDWAM019-04	CASENT0430591-D02	BLF04290	EF610815				Anochetus madagascarensis	644	06-Nov-2001	Vazimba 50	California Academy of Sciences	Anochetus	Anochetus madagascarensis	Brian Fisher	bfisher@calacademy.org	Fisher-Griswold Arthropod Team	06-Nov-2001	Madagascar	Mahajanga		Vazimba 50	Parc National Tsingy de Bemaraha, 3.4 km 93° E Bekopaka, Tombeau Vazimba	-19.142	44.828	50	EF13 ex rotten log|tropical dry forest|1w|f Guelph|http://www.antweb.org/specimen.do?name=CASENT0505298|CASENT0505298
JDWAM845-05	CASENT0432938-D01	BLF04232	EF610880				Anochetus goodmani	657	06-Nov-2001	Vazimba 50	California Academy of Sciences	Anochetus	Anochetus goodmani	Brian Fisher	bfisher@calacademy.org	Fisher-Griswold Arthropod Team	06-Nov-2001	Madagascar	Mahajanga		Vazimba 50	Parc National Tsingy de Bemaraha, 3.4 km 93° E Bekopaka, Tombeau Vazimba	-19.142	44.828	50	EF19 sifted litter (leaf mold, rotten wood)|tropical dry forest|1w|BOX-0167|http://www.antweb.org/specimen.do?name=CASENT0432938-D01
ASAM008-05	CASENT0432938-D02	BLF04232	EF610869	EU041966			Anochetus goodmani	613	06-Nov-2001	Vazimba 50	California Academy of Sciences	Anochetus	Anochetus goodmani	Brian Fisher	bfisher@calacademy.org	Fisher-Griswold Arthropod Team	06-Nov-2001	Madagascar	Mahajanga		Vazimba 50	Parc National Tsingy de Bemaraha, 3.4 km 93° E Bekopaka, Tombeau Vazimba	-19.142	44.828	50	EF19 sifted litter (leaf mold, rotten wood)|tropical dry forest|1w|BOX-0168|http://www.antweb.org/specimen.do?name=CASENT0432938-D02
ASAM009-05	CASENT0432964-D01	BLF04232	EF610871	EU041967			Anochetus goodmani	655	06-Nov-2001	Vazimba 50	California Academy of Sciences	Anochetus	Anochetus goodmani	Brian Fisher	bfisher@calacademy.org	Fisher-Griswold Arthropod Team	06-Nov-2001	Madagascar	Mahajanga		Vazimba 50	Parc National Tsingy de Bemaraha, 3.4 km 93° E Bekopaka, Tombeau Vazimba	-19.142	44.828	50	EF19 sifted litter (leaf mold, rotten wood)|tropical dry forest|1w|BOX-0168|http://www.antweb.org/specimen.do?name=CASENT0432964-D01
JDWAM805-05	CASENT0437642-D01	BLF04463	EF610722				Anochetus grandidieri	657	16-Nov-2001	Andranopasazy 150	California Academy of Sciences	Anochetus	Anochetus grandidieri	Brian Fisher	bfisher@calacademy.org	Fisher-Griswold Arthropod Team	16-Nov-2001	Madagascar	Mahajanga		Andranopasazy 150	Parc National Tsingy de Bemaraha, 10.6 km ESE 123° Antsalova	-18.709	44.718	150	EF13 ex rotten log|tropical dry forest on Tsingy|1w, 1p|BOX-0167|http://www.antweb.org/specimen.do?name=CASENT0437642-D01
JDWAM806-05	CASENT0441723-D01	BLF04471	EF610726				Anochetus grandidieri	657	16-Nov-2001	Andranopasazy 150	California Academy of Sciences	Anochetus	Anochetus grandidieri	Brian Fisher	bfisher@calacademy.org	Fisher-Griswold Arthropod Team	16-Nov-2001	Madagascar	Mahajanga		Andranopasazy 150	Parc National Tsingy de Bemaraha, 10.6 km ESE 123° Antsalova	-18.709	44.718	150	EF13 ex rotten log|tropical dry forest on Tsingy|1w, 1l|BOX-0167|http://www.antweb.org/specimen.do?name=CASENT0441723-D01
JDWAM831-05	CASENT0447693-D01	BLF05372	EF610817				Anochetus madagascarensis	657	03-Feb-2002	Bealoka 35	California Academy of Sciences	Anochetus	Anochetus madagascarensis	Brian Fisher	bfisher@calacademy.org	Fisher-Griswold Arthropod Team	03-Feb-2002	Madagascar	Toliara		Bealoka 35	Reserve Prive Berenty, Foret de Bealoka, Mandrare River, 14.6 km 329° NNW Amboasary	-24.957	46.272	35	ER13 ex rotten log|gallery forest|1w|BOX-0167|http://www.antweb.org/specimen.do?name=CASENT0447693-D01
JDWAM807-05	CASENT0454549-D01	BLF03252	EF610729				Anochetus grandidieri	418	04-Mar-2001	Ambilanivy 600	California Academy of Sciences	Anochetus	Anochetus grandidieri	Brian Fisher	bfisher@calacademy.org	Fisher, Griswold et al.	04-Mar-2001	Madagascar	Antsiranana, Faritany d'		Ambilanivy 600	Ampasindava, Foret d'Ambilanivy, 3.9 km 181° S Ambaliha	-13.799	48.162	600	EC19 sifted litter|rainforest|1w|BOX-0167|http://www.antweb.org/specimen.do?name=CASENT0454549-D01
JDWAM810-05	CASENT0460234-D01	BLF03338	EF610735				Anochetus grandidieri	428	11-Mar-2001	Anabohazo 120	California Academy of Sciences	Anochetus	Anochetus grandidieri	Brian Fisher	bfisher@calacademy.org	Fisher, Griswold et al.	11-Mar-2001	Madagascar	Antsiranana, Faritany d'		Anabohazo 120	Foret d'Anabohazo, 21.6 km 247° WSW Maromandia	-14.309	47.914	120	EF19 sifted litter|tropical dry forest|1w|BOX-0167|http://www.antweb.org/specimen.do?name=CASENT0460234-D01
JDWAM832-05	CASENT0460281-D01	BLF03338	EF610819				Anochetus madagascarensis	657	11-Mar-2001	Anabohazo 120	California Academy of Sciences	Anochetus	Anochetus madagascarensis	Brian Fisher	bfisher@calacademy.org	Fisher, Griswold et al.	11-Mar-2001	Madagascar	Antsiranana, Faritany d'		Anabohazo 120	Foret d'Anabohazo, 21.6 km 247° WSW Maromandia	-14.309	47.914	120	EF19 sifted litter|tropical dry forest|1w|BOX-0167|http://www.antweb.org/specimen.do?name=CASENT0460281-D01
JDWAM811-05	CASENT0460284-D01	BLF03338	EF610698				Anochetus grandidieri	607	11-Mar-2001	Anabohazo 120	California Academy of Sciences	Anochetus	Anochetus grandidieri	Brian Fisher	bfisher@calacademy.org	Fisher, Griswold et al.	11-Mar-2001	Madagascar	Antsiranana, Faritany d'		Anabohazo 120	Foret d'Anabohazo, 21.6 km 247° WSW Maromandia	-14.309	47.914	120	EF19 sifted litter|tropical dry forest|1w|BOX-0167|http://www.antweb.org/specimen.do?name=CASENT0460284-D01
JDWAM833-05	CASENT0461621-D01	BLF03422	EF610821				Anochetus madagascarensis	657	19-Mar-2001	Lokobe 30	California Academy of Sciences	Anochetus	Anochetus madagascarensis	Brian Fisher	bfisher@calacademy.org	Fisher, Griswold et al.	19-Mar-2001	Madagascar	Antsiranana, Faritany d'		Lokobe 30	Nosy Be, Reserve Naturelle Integrale de Lokobe, 6.3 km 112° ESE Hellville	-13.419	48.331	30	EC19 sifted litter|rainforest|1w|BOX-0167|http://www.antweb.org/specimen.do?name=CASENT0461621-D01
ASAM010-05	CASENT0472827-D01	BLF04432	EF610873	EU041968	EU042044		Anochetus goodmani	657	16-Nov-2001	Andranopasazy 150	California Academy of Sciences	Anochetus	Anochetus goodmani	Brian Fisher	bfisher@calacademy.org	Fisher-Griswold Arthropod Team	16-Nov-2001	Madagascar	Mahajanga		Andranopasazy 150	Parc National Tsingy de Bemaraha, 10.6 km ESE 123° Antsalova	-18.709	44.718	150	EF19 sifted litter (leaf mold, rotten wood)|tropical dry forest on Tsingy|1w|BOX-0168|http://www.antweb.org/specimen.do?name=CASENT0472827-D01
JDWAM813-05	CASENT0485697-D01	BLF07352	EF610703				Anochetus grandidieri	657	27-Jan-2003	Ranohira 725	California Academy of Sciences	Anochetus	Anochetus grandidieri	Brian Fisher	bfisher@calacademy.org	Fisher, Griswold et al.	27-Jan-2003	Madagascar	Fianarantsoa		Ranohira 725	Parc National d'Isalo, 9.1 km 354° N Ranohira	-22.482	45.462	725	ER19 sifted litter (leaf mold, rotten wood)|gallery forest|1w|BOX-0167|http://www.antweb.org/specimen.do?name=CASENT0485697-D01
ASAM3663-05	CASENT0486815-D01	BLF09130	EF610933				Odontomachus coquereli	627	19-Nov-2003	Marojejy 1325	California Academy of Sciences	Odontomachus	Odontomachus coquereli	Brian Fisher	bfisher@calacademy.org	B.L.Fisher	19-Nov-2003	Madagascar	Antsiranana, Faritany d'		Marojejy 1325	Parc National de Marojejy, Antranohofa, 26.6 km 31° NNE Andapa, 10.7 km 318° NW Manantenina	-14.443	49.743	1325	EB03 ex rotten log|montane rainforest|right hind leg of worker|BOX-0588|http://www.antweb.org/specimen.do?name=CASENT0486815-D01
ASAM3664-05	CASENT0486825-D01	BLF09239	EF610939				Odontomachus coquereli	657	20-Nov-2003	Marojejy 1325	California Academy of Sciences	Odontomachus	Odontomachus coquereli	Brian Fisher	bfisher@calacademy.org	B.L.Fisher	20-Nov-2003	Madagascar	Antsiranana, Faritany d'		Marojejy 1325	Parc National de Marojejy, Antranohofa, 26.6 km 31° NNE Andapa, 10.7 km 318° NW Manantenina	-14.443	49.743	1325	EB02 ground forager(s)|montane rainforest|right hind leg of worker|BOX-0588|http://www.antweb.org/specimen.do?name=CASENT0486825-D01
ASAM3665-05	CASENT0486860-D01	BLF09150	EF610944				Odontomachus coquereli	619	19-Nov-2003	Marojejy 1325	California Academy of Sciences	Odontomachus	Odontomachus coquereli	Brian Fisher	bfisher@calacademy.org	B.L.Fisher	19-Nov-2003	Madagascar	Antsiranana, Faritany d'		Marojejy 1325	Parc National de Marojejy, Antranohofa, 26.6 km 31° NNE Andapa, 10.7 km 318° NW Manantenina	-14.443	49.743	1325	EB17 beating low vegetation|montane rainforest|right hind leg of worker|BOX-0588|http://www.antweb.org/specimen.do?name=CASENT0486860-D01
ASAM868-05	CASENT0487419-D01	BLF09793	EF610906				Odontomachus coquereli	657	05-Dec-2003	Binara 1100	California Academy of Sciences	Odontomachus	Odontomachus coquereli	Brian Fisher	bfisher@calacademy.org	B.L.Fisher	05-Dec-2003	Madagascar	Antsiranana, Faritany d'		Binara 1100	Foret de Binara, 9.4km 235° SW Daraina	-13.263	49.6	1100	EB03 ex rotten log|montane rainforest|1l|BOX-0422|http://www.antweb.org/specimen.do?name=CASENT0487419-D01
ASAM3669-05	CASENT0487426-D01	BLF09843	EF610952				Odontomachus coquereli	427	06-Dec-2003	Binara 1100	California Academy of Sciences	Odontomachus	Odontomachus coquereli	Brian Fisher	bfisher@calacademy.org	B.L.Fisher	06-Dec-2003	Madagascar	Antsiranana, Faritany d'		Binara 1100	Foret de Binara, 9.4km 235° SW Daraina	-13.263	49.6	1100	EB03 ex rotten log|montane rainforest|right hind leg of worker|BOX-0588|http://www.antweb.org/specimen.do?name=CASENT0487426-D01
ASAM870-05	CASENT0487434-D01	BLF09801	EF610912				Odontomachus coquereli	657	05-Dec-2003	Binara 1100	California Academy of Sciences	Odontomachus	Odontomachus coquereli	Brian Fisher	bfisher@calacademy.org	B.L.Fisher	05-Dec-2003	Madagascar	Antsiranana, Faritany d'		Binara 1100	Foret de Binara, 9.4km 235° SW Daraina	-13.263	49.6	1100	EB03 ex rotten log|montane rainforest|1w|BOX-0422|http://www.antweb.org/specimen.do?name=CASENT0487434-D01
ASAM3670-05	CASENT0487434-D02	BLF09801	EF610958				Odontomachus coquereli	298	05-Dec-2003	Binara 1100	California Academy of Sciences	Odontomachus	Odontomachus coquereli	Brian Fisher	bfisher@calacademy.org	B.L.Fisher	05-Dec-2003	Madagascar	Antsiranana, Faritany d'		Binara 1100	Foret de Binara, 9.4km 235° SW Daraina	-13.263	49.6	1100	EB03 ex rotten log|montane rainforest|1w|BOX-0588|http://www.antweb.org/specimen.do?name=CASENT0487434-D02
ASAM3671-05	CASENT0487435-D01	BLF09858	EF610963				Odontomachus coquereli	615	06-Dec-2003	Binara 1100	California Academy of Sciences	Odontomachus	Odontomachus coquereli	Brian Fisher	bfisher@calacademy.org	B.L.Fisher	06-Dec-2003	Madagascar	Antsiranana, Faritany d'		Binara 1100	Foret de Binara, 9.4km 235° SW Daraina	-13.263	49.6	1100	EB02 ground forager(s)|montane rainforest|right hind leg of worker|BOX-0588|http://www.antweb.org/specimen.do?name=CASENT0487435-D01
ASAM024-05	CASENT0487595-D01	BLF10330	EF610870	EU041981	EU042059		Anochetus goodmani	657	16-Dec-2003	Andavakoera 425	California Academy of Sciences	Anochetus	Anochetus goodmani	Brian Fisher	bfisher@calacademy.org	B.L.Fisher	16-Dec-2003	Madagascar	Antsiranana, Faritany d'		Andavakoera 425	Foret d' Andavakoera, 21.4km 75° ENE Ambilobe; 4.6km 356° N Betsiaka	-13.118	49.23	425	EC18 ground nest|rainforest|1p|BOX-0168|http://www.antweb.org/specimen.do?name=CASENT0487595-D01
ASAM025-05	CASENT0487595-D02	BLF10330	EF610872	EU041982	EU042060		Anochetus goodmani	656	16-Dec-2003	Andavakoera 425	California Academy of Sciences	Anochetus	Anochetus goodmani	Brian Fisher	bfisher@calacademy.org	B.L.Fisher	16-Dec-2003	Madagascar	Antsiranana, Faritany d'		Andavakoera 425	Foret d' Andavakoera, 21.4km 75° ENE Ambilobe; 4.6km 356° N Betsiaka	-13.118	49.23	425	EC18 ground nest|rainforest|1p|BOX-0168|http://www.antweb.org/specimen.do?name=CASENT0487595-D02
JDWAM834-05	CASENT0487653-D01	BLF10300	EF610823				Anochetus madagascarensis	657	16-Dec-2003	Andavakoera 425	California Academy of Sciences	Anochetus	Anochetus madagascarensis	Brian Fisher	bfisher@calacademy.org	B.L.Fisher	16-Dec-2003	Madagascar	Antsiranana, Faritany d'		Andavakoera 425	Foret d' Andavakoera, 21.4km 75° ENE Ambilobe; 4.6km 356° N Betsiaka	-13.118	49.23	425	EC36 under moss, above ground|rainforest|1w|BOX-0167|http://www.antweb.org/specimen.do?name=CASENT0487653-D01
ASAM022-05	CASENT0487654-D01	BLF10301	EF610867	EU041979		EU042011	Anochetus goodmani	656	16-Dec-2003	Andavakoera 425	California Academy of Sciences	Anochetus	Anochetus goodmani	Brian Fisher	bfisher@calacademy.org	B.L.Fisher	16-Dec-2003	Madagascar	Antsiranana, Faritany d'		Andavakoera 425	Foret d' Andavakoera, 21.4km 75° ENE Ambilobe; 4.6km 356° N Betsiaka	-13.118	49.23	425	EC13 ex rotten log|rainforest|1l|BOX-0168|http://www.antweb.org/specimen.do?name=CASENT0487654-D01
ASAM023-05	CASENT0487654-D02	BLF10301	EF610868	EU041980	EU042058		Anochetus goodmani	657	16-Dec-2003	Andavakoera 425	California Academy of Sciences	Anochetus	Anochetus goodmani	Brian Fisher	bfisher@calacademy.org	B.L.Fisher	16-Dec-2003	Madagascar	Antsiranana, Faritany d'		Andavakoera 425	Foret d' Andavakoera, 21.4km 75° ENE Ambilobe; 4.6km 356° N Betsiaka	-13.118	49.23	425	EC13 ex rotten log|rainforest|1l|BOX-0168|http://www.antweb.org/specimen.do?name=CASENT0487654-D02
ASAM864-05	CASENT0487723-D01	BLF08933	EF610902				Odontomachus coquereli	657	16-Nov-2003	Marojejy 775	California Academy of Sciences	Odontomachus	Odontomachus coquereli	Brian Fisher	bfisher@calacademy.org	B.L.Fisher	16-Nov-2003	Madagascar	Antsiranana, Faritany d'		Marojejy 775	Parc National de Marojejy, Manantenina River, 27.6 km 35° NE Andapa, 9.6 km 327° NNW Manantenina	-14.435	49.76	775	EC11 under stone|rainforest|1l|BOX-0422|http://www.antweb.org/specimen.do?name=CASENT0487723-D01
ASAM3672-05	CASENT0487723-D02	BLF08933	EF610971				Odontomachus coquereli	616	16-Nov-2003	Marojejy 775	California Academy of Sciences	Odontomachus	Odontomachus coquereli	Brian Fisher	bfisher@calacademy.org	B.L.Fisher	16-Nov-2003	Madagascar	Antsiranana, Faritany d'		Marojejy 775	Parc National de Marojejy, Manantenina River, 27.6 km 35° NE Andapa, 9.6 km 327° NNW Manantenina	-14.435	49.76	775	EC11 under stone|rainforest|1w|BOX-0588|http://www.antweb.org/specimen.do?name=CASENT0487723-D02
ASAM3677-05	CASENT0487786-D01	BLF09077	EF610930				Odontomachus coquereli	657	17-Nov-2003	Marojejy 775	California Academy of Sciences	Odontomachus	Odontomachus coquereli	Brian Fisher	bfisher@calacademy.org	B.L.Fisher	17-Nov-2003	Madagascar	Antsiranana, Faritany d'		Marojejy 775	Parc National de Marojejy, Manantenina River, 27.6 km 35° NE Andapa, 9.6 km 327° NNW Manantenina	-14.435	49.76	775	EC12 ground forager(s)|rainforest|right hind leg of worker|BOX-0588|http://www.antweb.org/specimen.do?name=CASENT0487786-D01
ASAM866-05	CASENT0487800-D01	BLF08984	EF610904			EU042023	Odontomachus coquereli	657	16-Nov-2003	Marojejy 775	California Academy of Sciences	Odontomachus	Odontomachus coquereli	Brian Fisher	bfisher@calacademy.org	B.L.Fisher	16-Nov-2003	Madagascar	Antsiranana, Faritany d'		Marojejy 775	Parc National de Marojejy, Manantenina River, 27.6 km 35° NE Andapa, 9.6 km 327° NNW Manantenina	-14.435	49.76	775	EC13 ex rotten log|rainforest|1p|BOX-0422|http://www.antweb.org/specimen.do?name=CASENT0487800-D01
ASAM3678-05	CASENT0487800-D02	BLF08984	EF610936				Odontomachus coquereli	626	16-Nov-2003	Marojejy 775	California Academy of Sciences	Odontomachus	Odontomachus coquereli	Brian Fisher	bfisher@calacademy.org	B.L.Fisher	16-Nov-2003	Madagascar	Antsiranana, Faritany d'		Marojejy 775	Parc National de Marojejy, Manantenina River, 27.6 km 35° NE Andapa, 9.6 km 327° NNW Manantenina	-14.435	49.76	775	EC13 ex rotten log|rainforest|1w|BOX-0588|http://www.antweb.org/specimen.do?name=CASENT0487800-D02
ASAM862-05	CASENT0487823-D01	BLF08895	EF610921			EU042020	Odontomachus coquereli	657	15-Nov-2003	Marojejy 775	California Academy of Sciences	Odontomachus	Odontomachus coquereli	Brian Fisher	bfisher@calacademy.org	B.L.Fisher et al.	15-Nov-2003	Madagascar	Antsiranana, Faritany d'		Marojejy 775	Parc National de Marojejy, Manantenina River, 27.6 km 35° NE Andapa, 9.6 km 327° NNW Manantenina	-14.435	49.76	775	EC13 ex rotten log|rainforest|1l|BOX-0422|http://www.antweb.org/specimen.do?name=CASENT0487823-D01
ASAM3680-05	CASENT0487823-D02	BLF08895	EF610946				Odontomachus coquereli	640	15-Nov-2003	Marojejy 775	California Academy of Sciences	Odontomachus	Odontomachus coquereli	Brian Fisher	bfisher@calacademy.org	B.L.Fisher et al.	15-Nov-2003	Madagascar	Antsiranana, Faritany d'		Marojejy 775	Parc National de Marojejy, Manantenina River, 27.6 km 35° NE Andapa, 9.6 km 327° NNW Manantenina	-14.435	49.76	775	EC13 ex rotten log|rainforest|right hind leg of worker|BOX-0588|http://www.antweb.org/specimen.do?name=CASENT0487823-D02
ASAM3681-05	CASENT0487823-D03	BLF08895	EF610948				Odontomachus coquereli	657	15-Nov-2003	Marojejy 775	California Academy of Sciences	Odontomachus	Odontomachus coquereli	Brian Fisher	bfisher@calacademy.org	B.L.Fisher et al.	15-Nov-2003	Madagascar	Antsiranana, Faritany d'		Marojejy 775	Parc National de Marojejy, Manantenina River, 27.6 km 35° NE Andapa, 9.6 km 327° NNW Manantenina	-14.435	49.76	775	EC13 ex rotten log|rainforest|1w|BOX-0588|http://www.antweb.org/specimen.do?name=CASENT0487823-D03
ASAM861-05	CASENT0487831-D01	BLF08887	EF610920			EU042019	Odontomachus coquereli	657	15-Nov-2003	Marojejy 775	California Academy of Sciences	Odontomachus	Odontomachus coquereli	Brian Fisher	bfisher@calacademy.org	B.L.Fisher et al.	15-Nov-2003	Madagascar	Antsiranana, Faritany d'		Marojejy 775	Parc National de Marojejy, Manantenina River, 27.6 km 35° NE Andapa, 9.6 km 327° NNW Manantenina	-14.435	49.76	775	EC13 ex rotten log|rainforest|1w|BOX-0422|http://www.antweb.org/specimen.do?name=CASENT0487831-D01
ASAM3682-05	CASENT0487831-D02	BLF08887	EF610949				Odontomachus coquereli	374	15-Nov-2003	Marojejy 775	California Academy of Sciences	Odontomachus	Odontomachus coquereli	Brian Fisher	bfisher@calacademy.org	B.L.Fisher et al.	15-Nov-2003	Madagascar	Antsiranana, Faritany d'		Marojejy 775	Parc National de Marojejy, Manantenina River, 27.6 km 35° NE Andapa, 9.6 km 327° NNW Manantenina	-14.435	49.76	775	EC13 ex rotten log|rainforest|right hind leg of worker|BOX-0588|http://www.antweb.org/specimen.do?name=CASENT0487831-D02
ASAM3683-05	CASENT0487838-D01	BLF08921	EF610950				Odontomachus coquereli	626	15-Nov-2003	Marojejy 775	California Academy of Sciences	Odontomachus	Odontomachus coquereli	Brian Fisher	bfisher@calacademy.org	B.L.Fisher et al.	15-Nov-2003	Madagascar	Antsiranana, Faritany d'		Marojejy 775	Parc National de Marojejy, Manantenina River, 27.6 km 35° NE Andapa, 9.6 km 327° NNW Manantenina	-14.435	49.76	775	EC13 ex rotten log|rainforest|right hind leg of worker|BOX-0588|http://www.antweb.org/specimen.do?name=CASENT0487838-D01
ASAM863-05	CASENT0487860-D01	BLF08911	EF610901			EU042021	Odontomachus coquereli	656	15-Nov-2003	Marojejy 775	California Academy of Sciences	Odontomachus	Odontomachus coquereli	Brian Fisher	bfisher@calacademy.org	B.L.Fisher et al.	15-Nov-2003	Madagascar	Antsiranana, Faritany d'		Marojejy 775	Parc National de Marojejy, Manantenina River, 27.6 km 35° NE Andapa, 9.6 km 327° NNW Manantenina	-14.435	49.76	775	EC13 ex rotten log|rainforest|1p|BOX-0422|http://www.antweb.org/specimen.do?name=CASENT0487860-D01
ASAM3684-05	CASENT0487860-D02	BLF08911	EF610956				Odontomachus coquereli	657	15-Nov-2003	Marojejy 775	California Academy of Sciences	Odontomachus	Odontomachus coquereli	Brian Fisher	bfisher@calacademy.org	B.L.Fisher et al.	15-Nov-2003	Madagascar	Antsiranana, Faritany d'		Marojejy 775	Parc National de Marojejy, Manantenina River, 27.6 km 35° NE Andapa, 9.6 km 327° NNW Manantenina	-14.435	49.76	775	EC13 ex rotten log|rainforest|right hind leg of worker|BOX-0588|http://www.antweb.org/specimen.do?name=CASENT0487860-D02
ASAM3685-05	CASENT0487874-D01	BLF09067	EF610960				Odontomachus coquereli	629	17-Nov-2003	Marojejy 775	California Academy of Sciences	Odontomachus	Odontomachus coquereli	Brian Fisher	bfisher@calacademy.org	B.L.Fisher	17-Nov-2003	Madagascar	Antsiranana, Faritany d'		Marojejy 775	Parc National de Marojejy, Manantenina River, 27.6 km 35° NE Andapa, 9.6 km 327° NNW Manantenina	-14.435	49.76	775	EC12 ground forager(s)|rainforest|right hind leg of worker|BOX-0588|http://www.antweb.org/specimen.do?name=CASENT0487874-D01
JDWAM849-05	CASENT0487895-D01	BLF08985	EF610896				Anochetus boltoni	657	16-Nov-2003	Marojejy 775	California Academy of Sciences	Anochetus	Anochetus boltoni	Brian Fisher	bfisher@calacademy.org	B.L.Fisher	16-Nov-2003	Madagascar	Antsiranana, Faritany d'		Marojejy 775	Parc National de Marojejy, Manantenina River, 27.6 km 35° NE Andapa, 9.6 km 327° NNW Manantenina	-14.435	49.76	775	EC13 ex rotten log|rainforest|1w, 1l|BOX-0167|http://www.antweb.org/specimen.do?name=CASENT0487895-D01
ASAM041-05	CASENT0487895-D02	BLF08985	EF610894	EU041996	EU042079		Anochetus boltoni	657	16-Nov-2003	Marojejy 775	California Academy of Sciences	Anochetus	Anochetus boltoni	Brian Fisher	bfisher@calacademy.org	B.L.Fisher	16-Nov-2003	Madagascar	Antsiranana, Faritany d'		Marojejy 775	Parc National de Marojejy, Manantenina River, 27.6 km 35° NE Andapa, 9.6 km 327° NNW Manantenina	-14.435	49.76	775	EC13 ex rotten log|rainforest|1w|BOX-0168|http://www.antweb.org/specimen.do?name=CASENT0487895-D02
ASAM042-05	CASENT0487895-D03	BLF08985	EF610885				Anochetus boltoni	654	16-Nov-2003	Marojejy 775	California Academy of Sciences	Anochetus	Anochetus boltoni	Brian Fisher	bfisher@calacademy.org	B.L.Fisher	16-Nov-2003	Madagascar	Antsiranana, Faritany d'		Marojejy 775	Parc National de Marojejy, Manantenina River, 27.6 km 35° NE Andapa, 9.6 km 327° NNW Manantenina	-14.435	49.76	775	EC13 ex rotten log|rainforest|1w|BOX-0168|http://www.antweb.org/specimen.do?name=CASENT0487895-D03
ASAM043-05	CASENT0487895-D04	BLF08985	EF610886	EU041997	EU042082		Anochetus boltoni	651	16-Nov-2003	Marojejy 775	California Academy of Sciences	Anochetus	Anochetus boltoni	Brian Fisher	bfisher@calacademy.org	B.L.Fisher	16-Nov-2003	Madagascar	Antsiranana, Faritany d'		Marojejy 775	Parc National de Marojejy, Manantenina River, 27.6 km 35° NE Andapa, 9.6 km 327° NNW Manantenina	-14.435	49.76	775	EC13 ex rotten log|rainforest|1p|BOX-0168|http://www.antweb.org/specimen.do?name=CASENT0487895-D04
ASAM865-05	CASENT0487902-D01	BLF08944	EF610903			EU042022	Odontomachus coquereli	617	16-Nov-2003	Marojejy 775	California Academy of Sciences	Odontomachus	Odontomachus coquereli	Brian Fisher	bfisher@calacademy.org	B.L.Fisher	16-Nov-2003	Madagascar	Antsiranana, Faritany d'		Marojejy 775	Parc National de Marojejy, Manantenina River, 27.6 km 35° NE Andapa, 9.6 km 327° NNW Manantenina	-14.435	49.76	775	EC13 ex rotten log|rainforest|1w|BOX-0422|http://www.antweb.org/specimen.do?name=CASENT0487902-D01
ASAM3686-05	CASENT0487902-D02	BLF08944	EF610966				Odontomachus coquereli	610	16-Nov-2003	Marojejy 775	California Academy of Sciences	Odontomachus	Odontomachus coquereli	Brian Fisher	bfisher@calacademy.org	B.L.Fisher	16-Nov-2003	Madagascar	Antsiranana, Faritany d'		Marojejy 775	Parc National de Marojejy, Manantenina River, 27.6 km 35° NE Andapa, 9.6 km 327° NNW Manantenina	-14.435	49.76	775	EC13 ex rotten log|rainforest|1w|BOX-0588|http://www.antweb.org/specimen.do?name=CASENT0487902-D02
ASAM3687-05	CASENT0488689-D01	BLF08251	EF610968				Odontomachus coquereli	657	17-Mar-2003	Akirindro 600	California Academy of Sciences	Odontomachus	Odontomachus coquereli	Brian Fisher	bfisher@calacademy.org	Fisher, Griswold et al.	17-Mar-2003	Madagascar	Toamasina		Akirindro 600	Montagne d'Akirindro 7.6 km 341° NNW Ambinanitelo	-15.288	49.548	600	EC30 beating low vegetation|rainforest|right hind leg of worker|BOX-0588|http://www.antweb.org/specimen.do?name=CASENT0488689-D01
ASAM3688-05	CASENT0489107-D01	BLF08151	EF610972				Odontomachus coquereli	657	12-Mar-2003	Anjanaharibe 1100	California Academy of Sciences	Odontomachus	Odontomachus coquereli	Brian Fisher	bfisher@calacademy.org	Fisher, Griswold et al.	12-Mar-2003	Madagascar	Toamasina		Anjanaharibe 1100	Montagne d'Anjanaharibe, 19.5 km 27° NNE Ambinanitelo	-15.178	49.635	1100	EB17 beating low vegetation|montane rainforest|right middle leg of worker|BOX-0588|http://www.antweb.org/specimen.do?name=CASENT0489107-D01
JDWAM814-05	CASENT0489499-D01	BLF07083	EF610706				Anochetus grandidieri	657	13-Jan-2003	Ambohijanahary 1050	California Academy of Sciences	Anochetus	Anochetus grandidieri	Brian Fisher	bfisher@calacademy.org	Fisher, Griswold et al.	13-Jan-2003	Madagascar	Toliara		Ambohijanahary 1050	Reserve Speciale d'Ambohijanahary, Foret d'Ankazotsihitafototra, 35.2 km 312° NW Ambaravaranala	-18.267	45.407	1050	EB03 ex rotten log|montane rainforest|1w|BOX-0167|http://www.antweb.org/specimen.do?name=CASENT0489499-D01
JDWAM835-05	CASENT0489665-D01	BLF07427	EF610825				Anochetus madagascarensis	657	01-Feb-2003	Analalava 700	California Academy of Sciences	Anochetus	Anochetus madagascarensis	Brian Fisher	bfisher@calacademy.org	Fisher, Griswold et al.	01-Feb-2003	Madagascar	Fianarantsoa		Analalava 700	Foret d'Analalava, 29.6 km 280° W Ranohira	-22.592	45.128	700	EF13 ex rotten log|tropical dry forest|1w|BOX-0167|http://www.antweb.org/specimen.do?name=CASENT0489665-D01
JDWAM836-05	CASENT0490650-D01	BLF07693	EF610828				Anochetus madagascarensis	657	10-Feb-2003	Sahanafa 500	California Academy of Sciences	Anochetus	Anochetus madagascarensis	Brian Fisher	bfisher@calacademy.org	Fisher, Griswold et al.	10-Feb-2003	Madagascar	Fianarantsoa		Sahanafa 500	Parc National d'Isalo, Sahanafa River, 29.2 km 351° N Ranohira	-22.313	45.292	500	ER13 ex rotten log|gallery forest|1w|BOX-0167|http://www.antweb.org/specimen.do?name=CASENT0490650-D01
JDWAM837-05	CASENT0491074-D01	BLF06750	EF610830				Anochetus madagascarensis	657	19-Nov-2002	Androngonibe 30	California Academy of Sciences	Anochetus	Anochetus madagascarensis	Brian Fisher	bfisher@calacademy.org	Fisher, Griswold et al.	19-Nov-2002	Madagascar	Mahajanga		Androngonibe 30	Reserve Speciale de Bemarivo, 23.8 km 223° SW Besalampy	-16.925	44.368	30	EF13 ex rotten log|tropical dry forest|1w|BOX-0167|http://www.antweb.org/specimen.do?name=CASENT0491074-D01
JDWAM838-05	CASENT0491969-D01	BLF06475	EF610832				Anochetus madagascarensis	611	04-Nov-2002	Ambovonaomby 140	California Academy of Sciences	Anochetus	Anochetus madagascarensis	Brian Fisher	bfisher@calacademy.org	Fisher, Griswold et al.	04-Nov-2002	Madagascar	Mahajanga		Ambovonaomby 140	Parc National de Namoroka, 9.8 km 300° WNW Vilanandro	-16.467	45.35	140	EF19 sifted litter (leaf mold, rotten wood)|tropical dry forest|1w|BOX-0167|http://www.antweb.org/specimen.do?name=CASENT0491969-D01
JDWAM815-05	CASENT0493359-D01	BLF07538	EF610709				Anochetus grandidieri	534	05-Feb-2003	Zombitse 770	California Academy of Sciences	Anochetus	Anochetus grandidieri	Brian Fisher	bfisher@calacademy.org	Fisher, Griswold et al.	05-Feb-2003	Madagascar	Toliara		Zombitse 770	Parc National de Zombitse, 19.8 km 84° E Sakaraha	-22.843	44.71	770	EF13 ex rotten log|tropical dry forest|1w|BOX-0167|http://www.antweb.org/specimen.do?name=CASENT0493359-D01
ASAM3702-05	CASENT0494022-D01	BLF09809	EF610970				Odontomachus coquereli	610	05-Dec-2003	Binara 1100	California Academy of Sciences	Odontomachus	Odontomachus coquereli	Brian Fisher	bfisher@calacademy.org	B.L.Fisher	05-Dec-2003	Madagascar	Antsiranana, Faritany d'		Binara 1100	Foret de Binara, 9.4km 235° SW Daraina	-13.263	49.6	1100	EB03 ex rotten log|montane rainforest|right hind leg of worker|BOX-0588|http://www.antweb.org/specimen.do?name=CASENT0494022-D01
ASAM3703-05	CASENT0494054-D01	BLF09863	EF610974				Odontomachus coquereli	607	06-Dec-2003	Binara 1100	California Academy of Sciences	Odontomachus	Odontomachus coquereli	Brian Fisher	bfisher@calacademy.org	B.L.Fisher	06-Dec-2003	Madagascar	Antsiranana, Faritany d'		Binara 1100	Foret de Binara, 9.4km 235° SW Daraina	-13.263	49.6	1100	EB17 beating low vegetation|montane rainforest|right hind leg of worker|BOX-0588|http://www.antweb.org/specimen.do?name=CASENT0494054-D01
JDWAM839-05	CASENT0494289-D01	BLF09889	EF610834				Anochetus madagascarensis	657	07-Dec-2003	Bekaraoka 150	California Academy of Sciences	Anochetus	Anochetus madagascarensis	Brian Fisher	bfisher@calacademy.org	B.L.Fisher	07-Dec-2003	Madagascar	Antsiranana, Faritany d'		Bekaraoka 150	Foret de Bekaraoka, 6.8km 60° ENE Daraina	-13.167	49.71	150	EF13 ex rotten log|tropical dry forest|1w|BOX-0167|http://www.antweb.org/specimen.do?name=CASENT0494289-D01
ASAM867-05	CASENT0494515-D01	BLF09124	EF610905	EU042003		EU042024	Odontomachus coquereli	657	19-Nov-2003	Marojejy 1325	California Academy of Sciences	Odontomachus	Odontomachus coquereli	Brian Fisher	bfisher@calacademy.org	B.L.Fisher	19-Nov-2003	Madagascar	Antsiranana, Faritany d'		Marojejy 1325	Parc National de Marojejy, Antranohofa, 26.6 km 31° NNE Andapa, 10.7 km 318° NW Manantenina	-14.443	49.743	1325	EB03 ex rotten log|montane rainforest|1w|BOX-0422|http://www.antweb.org/specimen.do?name=CASENT0494515-D01
ASAM3704-05	CASENT0494515-D02	BLF09124	EF610976				Odontomachus coquereli	657	19-Nov-2003	Marojejy 1325	California Academy of Sciences	Odontomachus	Odontomachus coquereli	Brian Fisher	bfisher@calacademy.org	B.L.Fisher	19-Nov-2003	Madagascar	Antsiranana, Faritany d'		Marojejy 1325	Parc National de Marojejy, Antranohofa, 26.6 km 31° NNE Andapa, 10.7 km 318° NW Manantenina	-14.443	49.743	1325	EB03 ex rotten log|montane rainforest|1w|BOX-0588|http://www.antweb.org/specimen.do?name=CASENT0494515-D02
JDWAM816-05	CASENT0494829-D01	BLF09038	EF610714				Anochetus grandidieri	657	17-Nov-2003	Marojejy 775	California Academy of Sciences	Anochetus	Anochetus grandidieri	Brian Fisher	bfisher@calacademy.org	B.L.Fisher	17-Nov-2003	Madagascar	Antsiranana, Faritany d'		Marojejy 775	Parc National de Marojejy, Manantenina River, 27.6 km 35° NE Andapa, 9.6 km 327° NNW Manantenina	-14.435	49.76	775	EC13 ex rotten log|rainforest|1w|BOX-0167|http://www.antweb.org/specimen.do?name=CASENT0494829-D01
ASAM040-05	CASENT0494908-D01	BLF08992	EF610893				Anochetus boltoni	615	16-Nov-2003	Marojejy 775	California Academy of Sciences	Anochetus	Anochetus boltoni	Brian Fisher	bfisher@calacademy.org	B.L.Fisher	16-Nov-2003	Madagascar	Antsiranana, Faritany d'		Marojejy 775	Parc National de Marojejy, Manantenina River, 27.6 km 35° NE Andapa, 9.6 km 327° NNW Manantenina	-14.435	49.76	775	EC13 ex rotten log|rainforest|middle right leg of mounted worker|BOX-0168|http://www.antweb.org/specimen.do?name=CASENT0494908-D01
ASAM038-05	CASENT0494909-D01	BLF08992	EF610891	EU041994	EU042077		Anochetus boltoni	655	16-Nov-2003	Marojejy 775	California Academy of Sciences	Anochetus	Anochetus boltoni	Brian Fisher	bfisher@calacademy.org	B.L.Fisher	16-Nov-2003	Madagascar	Antsiranana, Faritany d'		Marojejy 775	Parc National de Marojejy, Manantenina River, 27.6 km 35° NE Andapa, 9.6 km 327° NNW Manantenina	-14.435	49.76	775	EC13 ex rotten log|rainforest|hind right leg of mounted worker|BOX-0168|http://www.antweb.org/specimen.do?name=CASENT0494909-D01
ASAM039-05	CASENT0494910-D01	BLF08992	EF610892	EU041995	EU042078		Anochetus boltoni	579	16-Nov-2003	Marojejy 775	California Academy of Sciences	Anochetus	Anochetus boltoni	Brian Fisher	bfisher@calacademy.org	B.L.Fisher	16-Nov-2003	Madagascar	Antsiranana, Faritany d'		Marojejy 775	Parc National de Marojejy, Manantenina River, 27.6 km 35° NE Andapa, 9.6 km 327° NNW Manantenina	-14.435	49.76	775	EC13 ex rotten log|rainforest|middle right leg of mounted worker|BOX-0168|http://www.antweb.org/specimen.do?name=CASENT0494910-D01
JDWAM817-05	CASENT0495027-D01	BLF08927	EF610716				Anochetus grandidieri	657	15-Nov-2003	Marojejy 775	California Academy of Sciences	Anochetus	Anochetus grandidieri	Brian Fisher	bfisher@calacademy.org	B.L.Fisher et al.	15-Nov-2003	Madagascar	Antsiranana, Faritany d'		Marojejy 775	Parc National de Marojejy, Manantenina River, 27.6 km 35° NE Andapa, 9.6 km 327° NNW Manantenina	-14.435	49.76	775	EC13 ex rotten log|rainforest|1w|BOX-0167|http://www.antweb.org/specimen.do?name=CASENT0495027-D01
ASAM3705-05	CASENT0495056-D01	BLF08146	EF610924				Odontomachus coquereli	619	08-Mar-2003	Anjanaharibe 470	California Academy of Sciences	Odontomachus	Odontomachus coquereli	Brian Fisher	bfisher@calacademy.org	Fisher, Griswold et al.	08-Mar-2003	Madagascar	Toamasina		Anjanaharibe 470	Montagne d'Anjanaharibe, 18.0 km 21° NNE Ambinanitelo	-15.188	49.615	470	EC13 ex rotten log|rainforest|right hind leg of worker|BOX-0588|http://www.antweb.org/specimen.do?name=CASENT0495056-D01
ASAM3720-05	CASENT0496048-D01	BLF08093	EF610926				Odontomachus coquereli	632	08-Mar-2003	Anjanaharibe 470	California Academy of Sciences	Odontomachus	Odontomachus coquereli	Brian Fisher	bfisher@calacademy.org	Fisher, Griswold et al.	08-Mar-2003	Madagascar	Toamasina		Anjanaharibe 470	Montagne d'Anjanaharibe, 18.0 km 21° NNE Ambinanitelo	-15.188	49.615	470	EC13 ex rotten log|rainforest|right hind leg of worker|BOX-0588|http://www.antweb.org/specimen.do?name=CASENT0496048-D01
ASAM857-05	CASENT0496117-D01	BLF08296	EF610916			EU042016	Odontomachus coquereli	656	17-Mar-2003	Akirindro 600	California Academy of Sciences	Odontomachus	Odontomachus coquereli	Brian Fisher	bfisher@calacademy.org	Fisher, Griswold et al.	17-Mar-2003	Madagascar	Toamasina		Akirindro 600	Montagne d'Akirindro 7.6 km 341° NNW Ambinanitelo	-15.288	49.548	600	EC13 ex rotten log|rainforest|1p|BOX-0422|http://www.antweb.org/specimen.do?name=CASENT0496117-D01
ASAM3723-05	CASENT0496117-D02	BLF08296	EF610932				Odontomachus coquereli	618	17-Mar-2003	Akirindro 600	California Academy of Sciences	Odontomachus	Odontomachus coquereli	Brian Fisher	bfisher@calacademy.org	Fisher, Griswold et al.	17-Mar-2003	Madagascar	Toamasina		Akirindro 600	Montagne d'Akirindro 7.6 km 341° NNW Ambinanitelo	-15.288	49.548	600	EC13 ex rotten log|rainforest|1w|BOX-0588|http://www.antweb.org/specimen.do?name=CASENT0496117-D02
ASAM858-05	CASENT0496128-D01	BLF08308	EF610917			EU042017	Odontomachus coquereli	657	17-Mar-2003	Akirindro 600	California Academy of Sciences	Odontomachus	Odontomachus coquereli	Brian Fisher	bfisher@calacademy.org	Fisher, Griswold et al.	17-Mar-2003	Madagascar	Toamasina		Akirindro 600	Montagne d'Akirindro 7.6 km 341° NNW Ambinanitelo	-15.288	49.548	600	EC24 ex rotting tree stump|rainforest|1p|BOX-0422|http://www.antweb.org/specimen.do?name=CASENT0496128-D01
ASAM3724-05	CASENT0496128-D02	BLF08308	EF610938				Odontomachus coquereli	657	17-Mar-2003	Akirindro 600	California Academy of Sciences	Odontomachus	Odontomachus coquereli	Brian Fisher	bfisher@calacademy.org	Fisher, Griswold et al.	17-Mar-2003	Madagascar	Toamasina		Akirindro 600	Montagne d'Akirindro 7.6 km 341° NNW Ambinanitelo	-15.288	49.548	600	EC24 ex rotting tree stump|rainforest|right hind leg of worker|BOX-0588|http://www.antweb.org/specimen.do?name=CASENT0496128-D02
ASAM3725-05	CASENT0496128-D03	BLF08308	EF610943				Odontomachus coquereli	657	17-Mar-2003	Akirindro 600	California Academy of Sciences	Odontomachus	Odontomachus coquereli	Brian Fisher	bfisher@calacademy.org	Fisher, Griswold et al.	17-Mar-2003	Madagascar	Toamasina		Akirindro 600	Montagne d'Akirindro 7.6 km 341° NNW Ambinanitelo	-15.288	49.548	600	EC24 ex rotting tree stump|rainforest|1p|BOX-0588|http://www.antweb.org/specimen.do?name=CASENT0496128-D03
ASAM854-05	CASENT0497055-D01	BLF08134	EF610908				Odontomachus coquereli	657	08-Mar-2003	Anjanaharibe 470	California Academy of Sciences	Odontomachus	Odontomachus coquereli	Brian Fisher	bfisher@calacademy.org	Fisher, Griswold et al.	08-Mar-2003	Madagascar	Toamasina		Anjanaharibe 470	Montagne d'Anjanaharibe, 18.0 km 21° NNE Ambinanitelo	-15.188	49.615	470	EC13 ex rotten log|rainforest|1l|BOX-0422|http://www.antweb.org/specimen.do?name=CASENT0497055-D01
JDWAM818-05	CASENT0497382-D01	BLF08501	EF610718				Anochetus grandidieri	657	27-Mar-2003	Vatoharanana 1100, 4.1 km	California Academy of Sciences	Anochetus	Anochetus grandidieri	Brian Fisher	bfisher@calacademy.org	Fisher, Griswold et al.	27-Mar-2003	Madagascar	Fianarantsoa		Vatoharanana 1100, 4.1 km	Parc National de Ranomafana, Vatoharanana River, 4.1 km 231° SW Ranomafana	-21.29	47.433	1100	EB03 ex rotten log|montane rainforest|1w|BOX-0167|http://www.antweb.org/specimen.do?name=CASENT0497382-D01
ASAM855-05	CASENT0497868-D01	BLF08175	EF610911	EU042001	EU042092	EU042014	Odontomachus coquereli	657	12-Mar-2003	Anjanaharibe 1100	California Academy of Sciences	Odontomachus	Odontomachus coquereli	Brian Fisher	bfisher@calacademy.org	Fisher, Griswold et al.	12-Mar-2003	Madagascar	Toamasina		Anjanaharibe 1100	Montagne d'Anjanaharibe, 19.5 km 27° NNE Ambinanitelo	-15.178	49.635	1100	EB03 ex rotten log|montane rainforest|1p|BOX-0422|http://www.antweb.org/specimen.do?name=CASENT0497868-D01
ASAM3731-05	CASENT0497868-D02	BLF08175	EF610962				Odontomachus coquereli	646	12-Mar-2003	Anjanaharibe 1100	California Academy of Sciences	Odontomachus	Odontomachus coquereli	Brian Fisher	bfisher@calacademy.org	Fisher, Griswold et al.	12-Mar-2003	Madagascar	Toamasina		Anjanaharibe 1100	Montagne d'Anjanaharibe, 19.5 km 27° NNE Ambinanitelo	-15.178	49.635	1100	EB03 ex rotten log|montane rainforest|right hind leg of worker|BOX-0588|http://www.antweb.org/specimen.do?name=CASENT0497868-D02
ASAM3732-05	CASENT0497868-D03	BLF08175	EF610969				Odontomachus coquereli	657	12-Mar-2003	Anjanaharibe 1100	California Academy of Sciences	Odontomachus	Odontomachus coquereli	Brian Fisher	bfisher@calacademy.org	Fisher, Griswold et al.	12-Mar-2003	Madagascar	Toamasina		Anjanaharibe 1100	Montagne d'Anjanaharibe, 19.5 km 27° NNE Ambinanitelo	-15.178	49.635	1100	EB03 ex rotten log|montane rainforest|1w|BOX-0588|http://www.antweb.org/specimen.do?name=CASENT0497868-D03
ASAM3733-05	CASENT0497884-D01	BLF08235	EF610973				Odontomachus coquereli	657	12-Mar-2003	Anjanaharibe 1100	California Academy of Sciences	Odontomachus	Odontomachus coquereli	Brian Fisher	bfisher@calacademy.org	Fisher, Griswold et al.	12-Mar-2003	Madagascar	Toamasina		Anjanaharibe 1100	Montagne d'Anjanaharibe, 19.5 km 27° NNE Ambinanitelo	-15.178	49.635	1100	EB03 ex rotten log|montane rainforest|right hind leg of worker|BOX-0588|http://www.antweb.org/specimen.do?name=CASENT0497884-D01
ASAM3734-05	CASENT0497884-D02	BLF08235	EF610975				Odontomachus coquereli	657	12-Mar-2003	Anjanaharibe 1100	California Academy of Sciences	Odontomachus	Odontomachus coquereli	Brian Fisher	bfisher@calacademy.org	Fisher, Griswold et al.	12-Mar-2003	Madagascar	Toamasina		Anjanaharibe 1100	Montagne d'Anjanaharibe, 19.5 km 27° NNE Ambinanitelo	-15.178	49.635	1100	EB03 ex rotten log|montane rainforest|1w|BOX-0588|http://www.antweb.org/specimen.do?name=CASENT0497884-D02
ASAM3735-05	CASENT0497917-D01	BLF08191	EF610923				Odontomachus coquereli	638	12-Mar-2003	Anjanaharibe 1100	California Academy of Sciences	Odontomachus	Odontomachus coquereli	Brian Fisher	bfisher@calacademy.org	Fisher, Griswold et al.	12-Mar-2003	Madagascar	Toamasina		Anjanaharibe 1100	Montagne d'Anjanaharibe, 19.5 km 27° NNE Ambinanitelo	-15.178	49.635	1100	EB03 ex rotten log|montane rainforest|right hind leg of male|BOX-0588|http://www.antweb.org/specimen.do?name=CASENT0497917-D01
ASAM3736-05	CASENT0497917-D02	BLF08191	EF610927				Odontomachus coquereli	657	12-Mar-2003	Anjanaharibe 1100	California Academy of Sciences	Odontomachus	Odontomachus coquereli	Brian Fisher	bfisher@calacademy.org	Fisher, Griswold et al.	12-Mar-2003	Madagascar	Toamasina		Anjanaharibe 1100	Montagne d'Anjanaharibe, 19.5 km 27° NNE Ambinanitelo	-15.178	49.635	1100	EB03 ex rotten log|montane rainforest|right hind leg of male|BOX-0588|http://www.antweb.org/specimen.do?name=CASENT0497917-D02
ASAM3737-05	CASENT0497918-D01	BLF08191	EF610929				Odontomachus coquereli	657	12-Mar-2003	Anjanaharibe 1100	California Academy of Sciences	Odontomachus	Odontomachus coquereli	Brian Fisher	bfisher@calacademy.org	Fisher, Griswold et al.	12-Mar-2003	Madagascar	Toamasina		Anjanaharibe 1100	Montagne d'Anjanaharibe, 19.5 km 27° NNE Ambinanitelo	-15.178	49.635	1100	EB03 ex rotten log|montane rainforest|1w|BOX-0588|http://www.antweb.org/specimen.do?name=CASENT0497918-D01
ASAM856-05	CASENT0497919-D01	BLF08191	EF610914	EU042002	EU042093	EU042015	Odontomachus coquereli	657	12-Mar-2003	Anjanaharibe 1100	California Academy of Sciences	Odontomachus	Odontomachus coquereli	Brian Fisher	bfisher@calacademy.org	Fisher, Griswold et al.	12-Mar-2003	Madagascar	Toamasina		Anjanaharibe 1100	Montagne d'Anjanaharibe, 19.5 km 27° NNE Ambinanitelo	-15.178	49.635	1100	EB03 ex rotten log|montane rainforest|1w|BOX-0422|http://www.antweb.org/specimen.do?name=CASENT0497919-D01
ASAM3738-05	CASENT0497919-D02	BLF08191	EF610935				Odontomachus coquereli	615	12-Mar-2003	Anjanaharibe 1100	California Academy of Sciences	Odontomachus	Odontomachus coquereli	Brian Fisher	bfisher@calacademy.org	Fisher, Griswold et al.	12-Mar-2003	Madagascar	Toamasina		Anjanaharibe 1100	Montagne d'Anjanaharibe, 19.5 km 27° NNE Ambinanitelo	-15.178	49.635	1100	EB03 ex rotten log|montane rainforest|1w|BOX-0588|http://www.antweb.org/specimen.do?name=CASENT0497919-D02
ASAM3739-05	CASENT0497936-D01	BLF08169	EF610941				Odontomachus coquereli	657	12-Mar-2003	Anjanaharibe 1100	California Academy of Sciences	Odontomachus	Odontomachus coquereli	Brian Fisher	bfisher@calacademy.org	Fisher, Griswold et al.	12-Mar-2003	Madagascar	Toamasina		Anjanaharibe 1100	Montagne d'Anjanaharibe, 19.5 km 27° NNE Ambinanitelo	-15.178	49.635	1100	EB13 ex root mat, ground layer|montane rainforest|right hind leg of worker|BOX-0588|http://www.antweb.org/specimen.do?name=CASENT0497936-D01
ASAM3740-05	CASENT0498041-D01	BLF08204	EF610945				Odontomachus coquereli	657	12-Mar-2003	Anjanaharibe 1100	California Academy of Sciences	Odontomachus	Odontomachus coquereli	Brian Fisher	bfisher@calacademy.org	Fisher, Griswold et al.	12-Mar-2003	Madagascar	Toamasina		Anjanaharibe 1100	Montagne d'Anjanaharibe, 19.5 km 27° NNE Ambinanitelo	-15.178	49.635	1100	EB13 ex root mat, ground layer|montane rainforest|right hind leg of worker|BOX-0588|http://www.antweb.org/specimen.do?name=CASENT0498041-D01
JDWAM819-05	CASENT0498167-D01	BLF07866	EF610721				Anochetus grandidieri	657	18-Feb-2003	Analavelona 1100	California Academy of Sciences	Anochetus	Anochetus grandidieri	Brian Fisher	bfisher@calacademy.org	Fisher, Griswold et al.	18-Feb-2003	Madagascar	Toliara		Analavelona 1100	Foret Classee d'Analavelona, 29.2 km 343° NNW Mahaboboka	-22.675	44.19	1100	EB03 ex rotten log|montane rainforest|1p|BOX-0167|http://www.antweb.org/specimen.do?name=CASENT0498167-D01
JDWAM846-05	CASENT0498310-D01	BLF09638	EF610881				Anochetus goodmani	657	02-Dec-2003	Binara 375	California Academy of Sciences	Anochetus	Anochetus goodmani	Brian Fisher	bfisher@calacademy.org	B.L.Fisher	02-Dec-2003	Madagascar	Antsiranana, Faritany d'		Binara 375	Foret de Binara, 7.5 km 230° SW Daraina	-13.255	49.617	375	EF11 under stone|tropical dry forest|1w|BOX-0167|http://www.antweb.org/specimen.do?name=CASENT0498310-D01
ASAM014-05	CASENT0498310-D02	BLF09638	EF610845	EU041972	EU042048		Anochetus goodmani	617	02-Dec-2003	Binara 375	California Academy of Sciences	Anochetus	Anochetus goodmani	Brian Fisher	bfisher@calacademy.org	B.L.Fisher	02-Dec-2003	Madagascar	Antsiranana, Faritany d'		Binara 375	Foret de Binara, 7.5 km 230° SW Daraina	-13.255	49.617	375	EF11 under stone|tropical dry forest|1w|BOX-0168|http://www.antweb.org/specimen.do?name=CASENT0498310-D02
JDWAM840-05	CASENT0498416-D01	BLF09981	EF610836				Anochetus madagascarensis	657	10-Dec-2003	Ampondrabe 175	California Academy of Sciences	Anochetus	Anochetus madagascarensis	Brian Fisher	bfisher@calacademy.org	B.L.Fisher	10-Dec-2003	Madagascar	Antsiranana, Faritany d'		Ampondrabe 175	Foret d'Ampondrabe, 26.3km 10° NNE Daraina	-12.97	49.7	175	EF18 ground nest|tropical dry forest|2w|BOX-0167|http://www.antweb.org/specimen.do?name=CASENT0498416-D01
ASAM026-05	CASENT0498957-D01	BLF10312	EF610875	EU041983	EU042061		Anochetus goodmani	656	16-Dec-2003	Andavakoera 425	California Academy of Sciences	Anochetus	Anochetus goodmani	Brian Fisher	bfisher@calacademy.org	B.L.Fisher	16-Dec-2003	Madagascar	Antsiranana, Faritany d'		Andavakoera 425	Foret d' Andavakoera, 21.4km 75° ENE Ambilobe; 4.6km 356° N Betsiaka	-13.118	49.23	425	EC11 under stone|rainforest|1w|BOX-0168|http://www.antweb.org/specimen.do?name=CASENT0498957-D01
ASAM027-05	CASENT0498957-D02	BLF10312	EF610841		EU042062		Anochetus goodmani	651	16-Dec-2003	Andavakoera 425	California Academy of Sciences	Anochetus	Anochetus goodmani	Brian Fisher	bfisher@calacademy.org	B.L.Fisher	16-Dec-2003	Madagascar	Antsiranana, Faritany d'		Andavakoera 425	Foret d' Andavakoera, 21.4km 75° ENE Ambilobe; 4.6km 356° N Betsiaka	-13.118	49.23	425	EC11 under stone|rainforest|1w|BOX-0168|http://www.antweb.org/specimen.do?name=CASENT0498957-D02
ASAM028-05	CASENT0498980-D01	BLF10358	EF610843	EU041984			Anochetus goodmani	657	16-Dec-2003	Andavakoera 425	California Academy of Sciences	Anochetus	Anochetus goodmani	Brian Fisher	bfisher@calacademy.org	B.L.Fisher	16-Dec-2003	Madagascar	Antsiranana, Faritany d'		Andavakoera 425	Foret d' Andavakoera, 21.4km 75° ENE Ambilobe; 4.6km 356° N Betsiaka	-13.118	49.23	425	EC11 under stone|rainforest|1p|BOX-0168|http://www.antweb.org/specimen.do?name=CASENT0498980-D01
ASAM029-05	CASENT0498980-D02	BLF10358	EF610844	EU041985			Anochetus goodmani	657	16-Dec-2003	Andavakoera 425	California Academy of Sciences	Anochetus	Anochetus goodmani	Brian Fisher	bfisher@calacademy.org	B.L.Fisher	16-Dec-2003	Madagascar	Antsiranana, Faritany d'		Andavakoera 425	Foret d' Andavakoera, 21.4km 75° ENE Ambilobe; 4.6km 356° N Betsiaka	-13.118	49.23	425	EC11 under stone|rainforest|1p|BOX-0168|http://www.antweb.org/specimen.do?name=CASENT0498980-D02
JDWAM847-05	CASENT0499020-D01	BLF10279	EF610882				Anochetus goodmani	657	16-Dec-2003	Andavakoera 425	California Academy of Sciences	Anochetus	Anochetus goodmani	Brian Fisher	bfisher@calacademy.org	B.L.Fisher	16-Dec-2003	Madagascar	Antsiranana, Faritany d'		Andavakoera 425	Foret d' Andavakoera, 21.4km 75° ENE Ambilobe; 4.6km 356° N Betsiaka	-13.118	49.23	425	EC11 under stone|rainforest|1w|BOX-0167|http://www.antweb.org/specimen.do?name=CASENT0499020-D01
ASAM021-05	CASENT0499020-D02	BLF10279	EF610865	EU041978	EU042055		Anochetus goodmani	656	16-Dec-2003	Andavakoera 425	California Academy of Sciences	Anochetus	Anochetus goodmani	Brian Fisher	bfisher@calacademy.org	B.L.Fisher	16-Dec-2003	Madagascar	Antsiranana, Faritany d'		Andavakoera 425	Foret d' Andavakoera, 21.4km 75° ENE Ambilobe; 4.6km 356° N Betsiaka	-13.118	49.23	425	EC11 under stone|rainforest|1w|BOX-0168|http://www.antweb.org/specimen.do?name=CASENT0499020-D02
ASAM3744-05	CASENT0499544-D01	BLF08761	EF610955				Odontomachus coquereli	624	12-Nov-2003	Marojejy 450	California Academy of Sciences	Odontomachus	Odontomachus coquereli	Brian Fisher	bfisher@calacademy.org	B.L.Fisher et al.	12-Nov-2003	Madagascar	Antsiranana, Faritany d'		Marojejy 450	Parc National de Marojejy, Manantenina River, 28.0 km 38° NE Andapa, 8.2 km 333° NNW Manantenina	-14.437	49.775	450	EC13 ex rotten log|rainforest|right hind leg of worker|BOX-0588|http://www.antweb.org/specimen.do?name=CASENT0499544-D01
ASAM859-05	CASENT0499577-D01	BLF08803	EF610918			EU042018	Odontomachus coquereli	657	12-Nov-2003	Marojejy 450	California Academy of Sciences	Odontomachus	Odontomachus coquereli	Brian Fisher	bfisher@calacademy.org	B.L.Fisher et al.	12-Nov-2003	Madagascar	Antsiranana, Faritany d'		Marojejy 450	Parc National de Marojejy, Manantenina River, 28.0 km 38° NE Andapa, 8.2 km 333° NNW Manantenina	-14.437	49.775	450	EC10 ex rotten branch on ground|rainforest|1p|BOX-0422|http://www.antweb.org/specimen.do?name=CASENT0499577-D01
ASAM3745-05	CASENT0499577-D02	BLF08803	EF610959				Odontomachus coquereli	657	12-Nov-2003	Marojejy 450	California Academy of Sciences	Odontomachus	Odontomachus coquereli	Brian Fisher	bfisher@calacademy.org	B.L.Fisher et al.	12-Nov-2003	Madagascar	Antsiranana, Faritany d'		Marojejy 450	Parc National de Marojejy, Manantenina River, 28.0 km 38° NE Andapa, 8.2 km 333° NNW Manantenina	-14.437	49.775	450	EC10 ex rotten branch on ground|rainforest|right hind leg of worker|BOX-0588|http://www.antweb.org/specimen.do?name=CASENT0499577-D02
ASAM3746-05	CASENT0499577-D03	BLF08803	EF610965				Odontomachus coquereli	639	12-Nov-2003	Marojejy 450	California Academy of Sciences	Odontomachus	Odontomachus coquereli	Brian Fisher	bfisher@calacademy.org	B.L.Fisher et al.	12-Nov-2003	Madagascar	Antsiranana, Faritany d'		Marojejy 450	Parc National de Marojejy, Manantenina River, 28.0 km 38° NE Andapa, 8.2 km 333° NNW Manantenina	-14.437	49.775	450	EC10 ex rotten branch on ground|rainforest|1p|BOX-0588|http://www.antweb.org/specimen.do?name=CASENT0499577-D03
ASAM3747-05	CASENT0499584-D01	BLF08852	EF610967				Odontomachus coquereli	632	12-Nov-2003	Marojejy 450	California Academy of Sciences	Odontomachus	Odontomachus coquereli	Brian Fisher	bfisher@calacademy.org	B.L.Fisher et al.	12-Nov-2003	Madagascar	Antsiranana, Faritany d'		Marojejy 450	Parc National de Marojejy, Manantenina River, 28.0 km 38° NE Andapa, 8.2 km 333° NNW Manantenina	-14.437	49.775	450	EC12 ground forager(s)|rainforest|right hind leg of worker|BOX-0588|http://www.antweb.org/specimen.do?name=CASENT0499584-D01
JDWAM848-05	CASENT0499942-D01	BLF09635	EF610883				Anochetus goodmani	657	02-Dec-2003	Binara 375	California Academy of Sciences	Anochetus	Anochetus goodmani	Brian Fisher	bfisher@calacademy.org	B.L.Fisher	02-Dec-2003	Madagascar	Antsiranana, Faritany d'		Binara 375	Foret de Binara, 7.5 km 230° SW Daraina	-13.255	49.617	375	EF11 under stone|tropical dry forest|1w, 1p|BOX-0167|http://www.antweb.org/specimen.do?name=CASENT0499942-D01
ASAM013-05	CASENT0499942-D02	BLF09635	EF610842	EU041971	EU042047		Anochetus goodmani	657	02-Dec-2003	Binara 375	California Academy of Sciences	Anochetus	Anochetus goodmani	Brian Fisher	bfisher@calacademy.org	B.L.Fisher	02-Dec-2003	Madagascar	Antsiranana, Faritany d'		Binara 375	Foret de Binara, 7.5 km 230° SW Daraina	-13.255	49.617	375	EF11 under stone|tropical dry forest|1w|BOX-0168|http://www.antweb.org/specimen.do?name=CASENT0499942-D02
JDWAM017-04	CASENT0505296	BLF02093	EF610810				Anochetus madagascarensis	645	22-Nov-1998	Petriky	California Academy of Sciences	Anochetus	Anochetus madagascarensis	Brian Fisher	bfisher@calacademy.org	B.L.Fisher	22-Nov-1998	Madagascar	Toliara		Petriky	Foret de Petriky, 12.5 km W 272° Tolagnaro	-25.062	46.87	10	EG13 ex rotten log|littoral rainforest|1w|f Guelph|http://www.antweb.org/specimen.do?name=CASENT0505296
JDWAM018-04	CASENT0505297	BLF04297	EF610813				Anochetus madagascarensis	648	06-Nov-2001	Vazimba 50	California Academy of Sciences	Anochetus	Anochetus madagascarensis	Brian Fisher	bfisher@calacademy.org	Fisher-Griswold Arthropod Team	06-Nov-2001	Madagascar	Mahajanga		Vazimba 50	Parc National Tsingy de Bemaraha, 3.4 km 93° E Bekopaka, Tombeau Vazimba	-19.142	44.828	50	EF13 ex rotten log|tropical dry forest|1w|f Guelph|http://www.antweb.org/specimen.do?name=CASENT0505297
JDWAM020-04	CASENT0505299	BLF03073	EF610884				Anochetus goodmani	644	16-Feb-2001	Ankarana 210	California Academy of Sciences	Anochetus	Anochetus goodmani	Brian Fisher	bfisher@calacademy.org	Fisher, Griswold et al.	16-Feb-2001	Madagascar	Antsiranana, Faritany d'		Ankarana 210	Reserve Speciale de l'Ankarana, 13.6 km 192° SSW Anivorano Nord	-12.864	49.226	210	EF18 ground nest|tropical dry forest|1w|f Guelph|http://www.antweb.org/specimen.do?name=CASENT0505299
JDWAM021-04	CASENT0505300	BLF02572	EF610713				Anochetus grandidieri	609	20-Jan-2001	Ambre 925	California Academy of Sciences	Anochetus	Anochetus grandidieri	Brian Fisher	bfisher@calacademy.org	Fisher, Griswold et al.	20-Jan-2001	Madagascar	Antsiranana, Faritany d'		Ambre 925	Parc National Montagne d'Ambre, 3.6 km 235° SW Joffreville	-12.534	49.18	925	EB03 ex rotten log|montane rainforest|1w|f Guelph|http://www.antweb.org/specimen.do?name=CASENT0505300
ASAMY133-07
ASAMY134-07
ASAMY139-07
ASAMY140-07
ASAMY142-07
ASAMY143-07
ASAMY144-07
ASAMY145-07
ASAMY146-07
ASAMY196-07
ASAMY197-07
ASAMY218-07
ASAMY224-07
ASAMY283-07
ASAMY284-07
ASAMY368-07
ASAMY369-07
ASAMY374-07
ASAMY375-07
ASAMY376-07
ASAMY404-07
ASAMY417-07
ASAMY418-07
ASAMY424-07
ASAMY426-07
ASAMY428-07
ASAMY429-07

## Sheet: Specimen Data
Project :	Project :	Revision of Malagasy Anochetus and Odontomachus			User :	Alex Smith
Created :	Created :	10-October-2007
Process ID	Sample ID	Phylum	Class	Order	Family	Subfamily	Genus	Species	Identifier	Identifier email	Voucher Type	Tissue Type	Sex	Reproduction	Life Stage	Extra Info	Notes	Collectors	Date Collected	Country/Ocean	Province	Region	Sector	Exact Site	Lat	Lon	GPS Source	Elev
ASAM848-05	CASENT0005967-D01	Arthropoda	Insecta	Hymenoptera	Formicidae		Odontomachus	Odontomachus coquereli	Brian Fisher	bfisher@calacademy.org						Manon 1175	EB15 ex rotten stick on ground|montane rainforest|1w|BOX-0422|http://www.antweb.org/specimen.do?name=CASENT0005967-D01	B.L.Fisher	19-Oct-1998	Madagascar	Antsiranana, Faritany d'		Manon 1175	R.S. Manongarivo, 14.5 km 220° SW Antanambao	-13.998	48.428		1175
JDWAM786-05	CASENT0006309-D01	Arthropoda	Insecta	Hymenoptera	Formicidae		Anochetus	Anochetus madagascarensis	Brian Fisher	bfisher@calacademy.org						Mandena	EG13 ex rotten log|littoral rainforest|1w|BOX-0167|http://www.antweb.org/specimen.do?name=CASENT0006309-D01	B.L.Fisher	20-Nov-1998	Madagascar	Toliara		Mandena	Mandena, 8.4 km NNE 30° Tolagnaro	-24.952	47.002		20
JDWAM787-05	CASENT0006312-D01	Arthropoda	Insecta	Hymenoptera	Formicidae		Anochetus	Anochetus madagascarensis	Brian Fisher	bfisher@calacademy.org						Petriky	EG13 ex rotten log|littoral rainforest|1w|BOX-0167|http://www.antweb.org/specimen.do?name=CASENT0006312-D01	B.L.Fisher	22-Nov-1998	Madagascar	Toliara		Petriky	Foret de Petriky, 12.5 km W 272° Tolagnaro	-25.062	46.87		10
JDWAM774-05	CASENT0006732-D01	Arthropoda	Insecta	Hymenoptera	Formicidae		Anochetus	Anochetus grandidieri	Brian Fisher	bfisher@calacademy.org						Andri 785	EC19 sifted litter|rainforest|1w|BOX-0167|http://www.antweb.org/specimen.do?name=CASENT0006732-D01	B.L.Fisher	25-Sep-1993	Madagascar	Fianarantsoa		Andri 785	45km S. Ambalavao	-22.217	47.017		785
JDWAM775-05	CASENT0006733-D01	Arthropoda	Insecta	Hymenoptera	Formicidae		Anochetus	Anochetus grandidieri	Brian Fisher	bfisher@calacademy.org						Andri 785	EC19 sifted litter|rainforest|1w|BOX-0167|http://www.antweb.org/specimen.do?name=CASENT0006733-D01	B.L.Fisher	25-Sep-1993	Madagascar	Fianarantsoa		Andri 785	45km S. Ambalavao	-22.217	47.017		785
JDWAM776-05	CASENT0006734-D01	Arthropoda	Insecta	Hymenoptera	Formicidae		Anochetus	Anochetus grandidieri	Brian Fisher	bfisher@calacademy.org						Amban 25	EC19 sifted litter|rainforest|1w|BOX-0167|http://www.antweb.org/specimen.do?name=CASENT0006734-D01	B.L.Fisher	14-Nov-1993	Madagascar	Toamasina		Amban 25	6.3 km S Ambanizana, Andranobe	-15.683	49.95		25
JDWAM777-05	CASENT0006735-D01	Arthropoda	Insecta	Hymenoptera	Formicidae		Anochetus	Anochetus grandidieri	Brian Fisher	bfisher@calacademy.org						Amban 25	EC19 sifted litter|rainforest|1w|BOX-0167|http://www.antweb.org/specimen.do?name=CASENT0006735-D01	B.L.Fisher	14-Nov-1993	Madagascar	Toamasina		Amban 25	6.3 km S Ambanizana, Andranobe	-15.683	49.95		25
JDWAM778-05	CASENT0006737-D01	Arthropoda	Insecta	Hymenoptera	Formicidae		Anochetus	Anochetus grandidieri	Brian Fisher	bfisher@calacademy.org						Tampolo 10a	EG10 sifted litter|littoral rainforest|1w|BOX-0167|http://www.antweb.org/specimen.do?name=CASENT0006737-D01	B.L.Fisher	10-Apr-1997	Madagascar	Toamasina		Tampolo 10a	S.F. Tampolo, 10 km NNE Fenoarivo Atn.	-17.283	49.417		10
JDWAM780-05	CASENT0006739-D01	Arthropoda	Insecta	Hymenoptera	Formicidae		Anochetus	Anochetus grandidieri	Brian Fisher	bfisher@calacademy.org						Manon 780	EC19 sifted litter|rainforest|1w|BOX-0167|http://www.antweb.org/specimen.do?name=CASENT0006739-D01	B.L.Fisher	11-Oct-1998	Madagascar	Antsiranana, Faritany d'		Manon 780	R.S. Manongarivo, 12.8 km 228° SW Antanambao	-13.977	48.423		780
JDWAM781-05	CASENT0006740-D01	Arthropoda	Insecta	Hymenoptera	Formicidae		Anochetus	Anochetus grandidieri	Brian Fisher	bfisher@calacademy.org						Manon 780	EC19 sifted litter|rainforest|1w|BOX-0167|http://www.antweb.org/specimen.do?name=CASENT0006740-D01	B.L.Fisher	11-Oct-1998	Madagascar	Antsiranana, Faritany d'		Manon 780	R.S. Manongarivo, 12.8 km 228° SW Antanambao	-13.977	48.423		780
JDWAM782-05	CASENT0006741-D01	Arthropoda	Insecta	Hymenoptera	Formicidae		Anochetus	Anochetus grandidieri	Brian Fisher	bfisher@calacademy.org						Manon 400	EC19 sifted litter|rainforest|1w|BOX-0167|http://www.antweb.org/specimen.do?name=CASENT0006741-D01	B.L.Fisher	08-Nov-1998	Madagascar	Antsiranana, Faritany d'		Manon 400	R.S. Manongarivo, 10.8 km 229° SW Antanambao	-13.962	48.433		400
JDWAM783-05	CASENT0006742-D01	Arthropoda	Insecta	Hymenoptera	Formicidae		Anochetus	Anochetus grandidieri	Brian Fisher	bfisher@calacademy.org						Mandena	EG10 sifted litter|littoral rainforest|1w|BOX-0167|http://www.antweb.org/specimen.do?name=CASENT0006742-D01	B.L.Fisher	20-Nov-1998	Madagascar	Toliara		Mandena	Mandena, 8.4 km NNE 30° Tolagnaro	-24.952	47.002		20
JDWAM784-05	CASENT0006743-D01	Arthropoda	Insecta	Hymenoptera	Formicidae		Anochetus	Anochetus grandidieri	Brian Fisher	bfisher@calacademy.org						Petriky	EG10 sifted litter|littoral rainforest|1w|BOX-0167|http://www.antweb.org/specimen.do?name=CASENT0006743-D01	B.L.Fisher	22-Nov-1998	Madagascar	Toliara		Petriky	Foret de Petriky, 12.5 km W 272° Tolagnaro	-25.062	46.87		10
JDWAM785-05	CASENT0006744-D01	Arthropoda	Insecta	Hymenoptera	Formicidae		Anochetus	Anochetus grandidieri	Brian Fisher	bfisher@calacademy.org						St. Luce	EG10 sifted litter|littoral rainforest|1w|BOX-0167|http://www.antweb.org/specimen.do?name=CASENT0006744-D01	B.L.Fisher (J.-Baptiste)	09-Dec-1998	Madagascar	Toliara		St. Luce	2.7 km WNW 302° Ste. Luce	-24.772	47.172		20
JDWAM788-05	CASENT0006745-D01	Arthropoda	Insecta	Hymenoptera	Formicidae		Anochetus	Anochetus madagascarensis	Brian Fisher	bfisher@calacademy.org						St. Luce	EG10 sifted litter|littoral rainforest|1w|BOX-0167|http://www.antweb.org/specimen.do?name=CASENT0006745-D01	B.L.Fisher (J.-Baptiste)	09-Dec-1998	Madagascar	Toliara		St. Luce	2.7 km WNW 302° Ste. Luce	-24.772	47.172		20
JDWAM789-05	CASENT0006746-D01	Arthropoda	Insecta	Hymenoptera	Formicidae		Anochetus	Anochetus madagascarensis	Brian Fisher	bfisher@calacademy.org						Francais 180	EF19 sifted litter|tropical dry forest|1w|BOX-0167|http://www.antweb.org/specimen.do?name=CASENT0006746-D01	Fisher, Griswold et al.	22-Feb-2001	Madagascar	Antsiranana, Faritany d'		Francais 180	Montagne des Francais, 7.2 km 142° SE Antsiranana (=Diego Suarez)	-12.323	49.338		180
JDWAM821-05	CASENT0006782-D01	Arthropoda	Insecta	Hymenoptera	Formicidae		Anochetus	Anochetus madagascarensis	Brian Fisher	bfisher@calacademy.org						TampoloE3 10	EG13 ex rotten log|littoral forest|1w|BOX-0167|http://www.antweb.org/specimen.do?name=CASENT0006782-D01	Malagasy ant team	15-Apr-2004	Madagascar	Toamasina		TampoloE3 10	Parcelle E3 Tampolo	-17.283	49.433		10
JDWAM790-05	CASENT0007161-D01	Arthropoda	Insecta	Hymenoptera	Formicidae		Anochetus	Anochetus grandidieri	Brian Fisher	bfisher@calacademy.org						Didy	EC13 ex rotten log|rainforest|1w|BOX-0167|http://www.antweb.org/specimen.do?name=CASENT0007161-D01	H.J.Ratsirarson	16-Dec-1998	Madagascar	Toamasina		Didy	F.C. Didy	-18.198	48.578		960
JDWAM822-05	CASENT0007163-D01	Arthropoda	Insecta	Hymenoptera	Formicidae		Anochetus	Anochetus madagascarensis	Brian Fisher	bfisher@calacademy.org						Manon 400	EC13 ex rotten log|rainforest|1w|BOX-0167|http://www.antweb.org/specimen.do?name=CASENT0007163-D01	B.L.Fisher	08-Nov-1998	Madagascar	Antsiranana, Faritany d'		Manon 400	R.S. Manongarivo, 10.8 km 229° SW Antanambao	-13.962	48.433		400
JDWAM823-05	CASENT0007166-D01	Arthropoda	Insecta	Hymenoptera	Formicidae		Anochetus	Anochetus madagascarensis	Brian Fisher	bfisher@calacademy.org						Manon 780	EC13 ex rotten log|rainforest|1w|BOX-0167|http://www.antweb.org/specimen.do?name=CASENT0007166-D01	B.L.Fisher	11-Oct-1998	Madagascar	Antsiranana, Faritany d'		Manon 780	R.S. Manongarivo, 12.8 km 228° SW Antanambao	-13.977	48.423		780
JDWAM791-05	CASENT0007167-D01	Arthropoda	Insecta	Hymenoptera	Formicidae		Anochetus	Anochetus grandidieri	Brian Fisher	bfisher@calacademy.org						Amban 825	EC13 ex rotten log|rainforest|1w|BOX-0167|http://www.antweb.org/specimen.do?name=CASENT0007167-D01	B.L.Fisher	08-Dec-1993	Madagascar	Toamasina		Amban 825	6.9 km NE Ambanizana, Ambohitsitondroina	-15.567	50		825
ASAM3144-05	CASENT0008647-D01	Arthropoda	Insecta	Hymenoptera	Formicidae		Odontomachus	Odontomachus coquereli	Brian Fisher	bfisher@calacademy.org						Manantenina 450	malaise trap|montane rainforest|right hind leg of worker|BOX-0588|http://www.antweb.org/specimen.do?name=CASENT0008647-D01	E.L. Quinter	05-Oct-1996	Madagascar	Antsiranana, Faritany d'		Manantenina 450	RNI Marojejy, 8km NW Manantenina	-14.433	49.783		450
ASAM340-05	CASENT0009055-D01	Arthropoda	Insecta	Hymenoptera	Formicidae		Anochetus	Anochetus madagascarensis	Brian Fisher	bfisher@calacademy.org						Mt. Combani 470	winkler trap|forest litter|right hind leg of worker|BOX-0171|http://www.antweb.org/specimen.do?name=CASENT0009055-D01	R.Jocque & G.DeSmet	22-Feb-1999	Comoros		Mayotte	Mt. Combani 470	Mt. Combani	-12.8	45.133		470
ASAM344-05	CASENT0009058-D01	Arthropoda	Insecta	Hymenoptera	Formicidae		Anochetus	Anochetus madagascarensis	Brian Fisher	bfisher@calacademy.org						Sazile	winkler trap|dry forest litter|1w|BOX-0171|http://www.antweb.org/specimen.do?name=CASENT0009058-D01	R.Jocque & G.DeSmet	26-Feb-1999	Comoros		Mayotte	Sazile	Sazile	-12.967	45.167
ASAM345-05	CASENT0009058-D02	Arthropoda	Insecta	Hymenoptera	Formicidae		Anochetus	Anochetus madagascarensis	Brian Fisher	bfisher@calacademy.org						Sazile	winkler trap|dry forest litter|1w|BOX-0171|http://www.antweb.org/specimen.do?name=CASENT0009058-D02	R.Jocque & G.DeSmet	26-Feb-1999	Comoros		Mayotte	Sazile	Sazile	-12.967	45.167
ASAM343-05	CASENT0009059-D01	Arthropoda	Insecta	Hymenoptera	Formicidae		Anochetus	Anochetus madagascarensis	Brian Fisher	bfisher@calacademy.org						Sazile	winkler trap|dry forest litter|1w|BOX-0171|http://www.antweb.org/specimen.do?name=CASENT0009059-D01	R.Jocque & G.DeSmet	26-Feb-1999	Comoros		Mayotte	Sazile	Sazile	-12.967	45.167
ASAM348-05	CASENT0009062-D01	Arthropoda	Insecta	Hymenoptera	Formicidae		Anochetus	Anochetus madagascarensis	Brian Fisher	bfisher@calacademy.org						Dziani Karihani	pitfall trap|forest|1w|BOX-0171|http://www.antweb.org/specimen.do?name=CASENT0009062-D01	R.Jocque & G.DeSmet	14-Feb-1999	Comoros		Mayotte	Dziani Karihani	Dziani Karihani	-12.783	45.117
ASAM338-05	CASENT0009106-D01	Arthropoda	Insecta	Hymenoptera	Formicidae		Anochetus	Anochetus madagascarensis	Brian Fisher	bfisher@calacademy.org						Convalescence	|ruins|1w|BOX-0171|http://www.antweb.org/specimen.do?name=CASENT0009106-D01	R.Jocque & G.DeSmet	16-Feb-1999	Comoros		Mayotte	Convalescence	Convalescence	-12.767	45.183
ASAM339-05	CASENT0009107-D01	Arthropoda	Insecta	Hymenoptera	Formicidae		Anochetus	Anochetus madagascarensis	Brian Fisher	bfisher@calacademy.org						Convalescence	sweeping|road verges|1w|BOX-0171|http://www.antweb.org/specimen.do?name=CASENT0009107-D01	R.Jocque & G.DeSmet	16-Feb-1999	Comoros		Mayotte	Convalescence	Convalescence	-12.767	45.183
ASAM936-05	CASENT0009166-D01	Arthropoda	Insecta	Hymenoptera	Formicidae		Odontomachus	Odontomachus troglodytes	Brian Fisher	bfisher@calacademy.org						Sangha 420	EC27 pitfall trap|rainforest|1w|BOX-0422|http://www.antweb.org/specimen.do?name=CASENT0009166-D01	B.L.Fisher	10-May-2001	Central African Republic	Sangha-Mbaere		Sangha 420	Reserve Speciale de Foret Dense de Dzanga-Sangha, 12.7 km 326° NW Bayanga	3.005	16.193		420
ASAM938-05	CASENT0009199-D01	Arthropoda	Insecta	Hymenoptera	Formicidae		Odontomachus	Odontomachus troglodytes	Brian Fisher	bfisher@calacademy.org						Ndakan 350	EC27 pitfall trap|rainforest|1w|BOX-0422|http://www.antweb.org/specimen.do?name=CASENT0009199-D01	B.L.Fisher	20-May-2001	Central African Republic	Sangha-Mbaere		Ndakan 350	Parc National Dzanga-Ndoki, 38.6 km 173° S Lidjombo	2.36	16.053		350
ASAM659-05	CASENT0009407-D01	Arthropoda	Insecta	Hymenoptera	Formicidae		Odontomachus	Odontomachus coquereli	Brian Fisher	bfisher@calacademy.org						Andri 785	EC13 ex rotten log|rainforest|1w|BOX-0420|http://www.antweb.org/specimen.do?name=CASENT0009407-D01	B.L.Fisher	01-Oct-1993	Madagascar	Fianarantsoa		Andri 785	45km S. Ambalavao	-22.217	47.017		785
ASAM660-05	CASENT0009408-D01	Arthropoda	Insecta	Hymenoptera	Formicidae		Odontomachus	Odontomachus coquereli	Brian Fisher	bfisher@calacademy.org						Anja 875	EC18 ground nest|rainforest|1w|BOX-0420|http://www.antweb.org/specimen.do?name=CASENT0009408-D01	B.L.Fisher	20-Oct-1994	Madagascar	Antsiranana, Faritany d'		Anja 875	6.5 km SSW Befingotra, Res. Anjanaharibe-Sud	-14.75	49.5		875
ASAM661-05	CASENT0009409-D01	Arthropoda	Insecta	Hymenoptera	Formicidae		Odontomachus	Odontomachus coquereli	Brian Fisher	bfisher@calacademy.org						Anja 875	EC18 ground nest|rainforest|1w|BOX-0420|http://www.antweb.org/specimen.do?name=CASENT0009409-D01	B.L.Fisher	23-Oct-1994	Madagascar	Antsiranana, Faritany d'		Anja 875	6.5 km SSW Befingotra, Res. Anjanaharibe-Sud	-14.75	49.5		875
ASAM933-05	CASENT0009456-D01	Arthropoda	Insecta	Hymenoptera	Formicidae		Odontomachus	Odontomachus troglodytes	Brian Fisher	bfisher@calacademy.org						Doudou 110c	EC13 ex rotten log|rainforest|1w|BOX-0422|http://www.antweb.org/specimen.do?name=CASENT0009456-D01	B.L.Fisher	24-Feb-2000	Gabon	Ogooue-Maritime		Doudou 110c	Reserve de Faune de la Moukalaba-Dougoua, 12.2 km 305° NW Doussala	-2.317	10.533		110
ASAM934-05	CASENT0009457-D01	Arthropoda	Insecta	Hymenoptera	Formicidae		Odontomachus	Odontomachus troglodytes	Brian Fisher	bfisher@calacademy.org						Ebodje	EG15 ex dead twig above ground|littoral rainforest|1w|BOX-0422|http://www.antweb.org/specimen.do?name=CASENT0009457-D01	B.L.Fisher	09-Apr-2000	Cameroon		Sud	Ebodje	Res. de Faune de Campo, 2.16 km 106° ESE Ebodje	2.568	9.844		10
ASAM940-05	CASENT0009459-D01	Arthropoda	Insecta	Hymenoptera	Formicidae		Odontomachus	Odontomachus assiniensis	Brian Fisher	bfisher@calacademy.org						Ndakan 350	EC27 pitfall trap|rainforest|1w|BOX-0422|http://www.antweb.org/specimen.do?name=CASENT0009459-D01	B.L.Fisher	20-May-2001	Central African Republic	Sangha-Mbaere		Ndakan 350	Parc National Dzanga-Ndoki, 38.6 km 173° S Lidjombo	2.36	16.053		350
ASAM847-05	CASENT0009483-D01	Arthropoda	Insecta	Hymenoptera	Formicidae		Odontomachus	Odontomachus coquereli	Brian Fisher	bfisher@calacademy.org						Manon 1175	EB13 ex root mat, ground layer|montane rainforest|1w|BOX-0422|http://www.antweb.org/specimen.do?name=CASENT0009483-D01	B.L.Fisher	19-Oct-1998	Madagascar	Antsiranana, Faritany d'		Manon 1175	R.S. Manongarivo, 14.5 km 220° SW Antanambao	-13.998	48.428		1175
ASAM853-05	CASENT0009484-D01	Arthropoda	Insecta	Hymenoptera	Formicidae		Odontomachus	Odontomachus coquereli	Brian Fisher	bfisher@calacademy.org						Manon 1175	EB03 ex rotten log|montane rainforest|1w|BOX-0422|http://www.antweb.org/specimen.do?name=CASENT0009484-D01	B.L.Fisher	19-Oct-1998	Madagascar	Antsiranana, Faritany d'		Manon 1175	R.S. Manongarivo, 14.5 km 220° SW Antanambao	-13.998	48.428		1175
ASAM849-05	CASENT0009615-D01	Arthropoda	Insecta	Hymenoptera	Formicidae		Odontomachus	Odontomachus troglodytes	Brian Fisher	bfisher@calacademy.org						Tampolo 10b	EG13 ex rotten log|littoral rainforest|1l|BOX-0422|http://www.antweb.org/specimen.do?name=CASENT0009615-D01	B.L.Fisher	10-Apr-1997	Madagascar	Toamasina		Tampolo 10b	S.F. Tampolo, 10 km NNE Fenoarivo Atn.	-17.283	49.433		10
ASAM850-05	CASENT0009616-D01	Arthropoda	Insecta	Hymenoptera	Formicidae		Odontomachus	Odontomachus troglodytes	Brian Fisher	bfisher@calacademy.org						Tampolo 10b	EG13 ex rotten log|littoral rainforest|1p|BOX-0422|http://www.antweb.org/specimen.do?name=CASENT0009616-D01	B.L.Fisher	10-Apr-1997	Madagascar	Toamasina		Tampolo 10b	S.F. Tampolo, 10 km NNE Fenoarivo Atn.	-17.283	49.433		10
ASAM851-05	CASENT0009617-D01	Arthropoda	Insecta	Hymenoptera	Formicidae		Odontomachus	Odontomachus troglodytes	Brian Fisher	bfisher@calacademy.org						Tampolo 10a	EG13 ex rotten log|littoral rainforest|1l|BOX-0422|http://www.antweb.org/specimen.do?name=CASENT0009617-D01	B.L.Fisher	12-Apr-1997	Madagascar	Toamasina		Tampolo 10a	S.F. Tampolo, 10 km NNE Fenoarivo Atn.	-17.283	49.417		10
ASAM044-05	CASENT0011443-D01	Arthropoda	Insecta	Hymenoptera	Formicidae		Anochetus	Anochetus boltoni	Brian Fisher	bfisher@calacademy.org						Ambanitaza 240	EC13 ex rotten log|rainforest|1l|BOX-0168|http://www.antweb.org/specimen.do?name=CASENT0011443-D01	B.L.Fisher	27-Nov-2004	Madagascar	Antsiranana, Faritany d'		Ambanitaza 240	Foret Ambanitaza, 26.1 km 347° Antalaha	-14.679	50.184		240
ASAM045-05	CASENT0011443-D02	Arthropoda	Insecta	Hymenoptera	Formicidae		Anochetus	Anochetus boltoni	Brian Fisher	bfisher@calacademy.org						Ambanitaza 240	EC13 ex rotten log|rainforest|1w|BOX-0168|http://www.antweb.org/specimen.do?name=CASENT0011443-D02	B.L.Fisher	27-Nov-2004	Madagascar	Antsiranana, Faritany d'		Ambanitaza 240	Foret Ambanitaza, 26.1 km 347° Antalaha	-14.679	50.184		240
ASAM046-05	CASENT0011443-D03	Arthropoda	Insecta	Hymenoptera	Formicidae		Anochetus	Anochetus boltoni	Brian Fisher	bfisher@calacademy.org						Ambanitaza 240	EC13 ex rotten log|rainforest|1w|BOX-0168|http://www.antweb.org/specimen.do?name=CASENT0011443-D03	B.L.Fisher	27-Nov-2004	Madagascar	Antsiranana, Faritany d'		Ambanitaza 240	Foret Ambanitaza, 26.1 km 347° Antalaha	-14.679	50.184		240
ASAM349-05	CASENT0011504-D01	Arthropoda	Insecta	Hymenoptera	Formicidae		Anochetus	Anochetus madagascarensis	Brian Fisher	bfisher@calacademy.org						Mt. Combani 470	winkler trap|forest litter|right hind leg of worker|BOX-0171|http://www.antweb.org/specimen.do?name=CASENT0011504-D01	R.Jocque & G.DeSmet	22-Feb-1999	Comoros		Mayotte	Mt. Combani 470	Mt. Combani	-12.8	45.133		470
ASAM351-05	CASENT0011505-D01	Arthropoda	Insecta	Hymenoptera	Formicidae		Anochetus	Anochetus madagascarensis	Brian Fisher	bfisher@calacademy.org						Mt. Benara 630	winkler trap|forest litter|right hind leg of dealate queen|BOX-0171|http://www.antweb.org/specimen.do?name=CASENT0011505-D01	R.Jocque & G.DeSmet	23-Feb-1999	Comoros		Mayotte	Mt. Benara 630	Mt. Benara	-12.867	45.183		630
ASAM350-05	CASENT0011506-D01	Arthropoda	Insecta	Hymenoptera	Formicidae		Anochetus	Anochetus madagascarensis	Brian Fisher	bfisher@calacademy.org						Mt. Benara 630	winkler trap|forest litter|right hind leg of worker|BOX-0171|http://www.antweb.org/specimen.do?name=CASENT0011506-D01	R.Jocque & G.DeSmet	23-Feb-1999	Comoros		Mayotte	Mt. Benara 630	Mt. Benara	-12.867	45.183		630
ASAM352-05	CASENT0011507-D01	Arthropoda	Insecta	Hymenoptera	Formicidae		Anochetus	Anochetus madagascarensis	Brian Fisher	bfisher@calacademy.org						Tsingoni	winkler trap|litter of shrubs on mangrove edge|1w|BOX-0171|http://www.antweb.org/specimen.do?name=CASENT0011507-D01	R.Jocque & G.DeSmet	27-Feb-1999	Comoros		Mayotte	Tsingoni	Tsingoni	-12.783	45.1
ASAM353-05	CASENT0011508-D01	Arthropoda	Insecta	Hymenoptera	Formicidae		Anochetus	Anochetus madagascarensis	Brian Fisher	bfisher@calacademy.org						Mt. Choungui 360	pitfall trap|forest near fallen tree|1w|BOX-0171|http://www.antweb.org/specimen.do?name=CASENT0011508-D01	R.Jocque & G.DeSmet	15-Feb-1999	Comoros		Mayotte	Mt. Choungui 360	Mt. Choungui	-12.8	45.1		360
ASAMI170-07	CASENT0012708-D01	Arthropoda	Insecta	Hymenoptera	Formicidae		Odontomachus	Odontomachus simillimus	Brian Fisher	bfisher@calacademy.org						Colo-i-Suva 340	winkler 2||1w|BOX-1938|http://www.antweb.org/specimen.do?name=CASENT0012708-D01	M.Tokota'a	30-Jun-2002	Fiji			Colo-i-Suva 340	Viti Levu, Nakobalevu, 1.5km NE Colo-i-Suva Village	-18.05	178.417		340
ASAMI171-07	CASENT0012708-D02	Arthropoda	Insecta	Hymenoptera	Formicidae		Odontomachus	Odontomachus simillimus	Brian Fisher	bfisher@calacademy.org						Colo-i-Suva 340	winkler 2||1w|BOX-1938|http://www.antweb.org/specimen.do?name=CASENT0012708-D02	M.Tokota'a	30-Jun-2002	Fiji			Colo-i-Suva 340	Viti Levu, Nakobalevu, 1.5km NE Colo-i-Suva Village	-18.05	178.417		340
ASAMI173-07	CASENT0012709-D02	Arthropoda	Insecta	Hymenoptera	Formicidae		Odontomachus	Odontomachus simillimus	Brian Fisher	bfisher@calacademy.org						Moanakaka 60	Malaise||1m|BOX-1938|http://www.antweb.org/specimen.do?name=CASENT0012709-D02	Schlinger, Tokota'a	09-Feb-2004	Fiji		Kadavu	Moanakaka 60	Kadavu, 0.25km SW Solodamu Village, Moanakaka Bird Sanctuary	-19.078	178.121		60
ASAMI176-07	CASENT0012711-D01	Arthropoda	Insecta	Hymenoptera	Formicidae		Odontomachus	Odontomachus simillimus	Brian Fisher	bfisher@calacademy.org						Koroyanitu	Malaise||1m|BOX-1938|http://www.antweb.org/specimen.do?name=CASENT0012711-D01	Schlinger, Tokoka'a	07-Oct-2002	Fiji		Vuda	Koroyanitu	Viti Levu Island, Koroyanitu N. M. P. 0.5 km N of Abaca Village	-17.666	177.55		800
ASAMI177-07	CASENT0012712-D01	Arthropoda	Insecta	Hymenoptera	Formicidae		Odontomachus	Odontomachus simillimus	Brian Fisher	bfisher@calacademy.org						Mt. Kuitarua 470	||1w|BOX-1938|http://www.antweb.org/specimen.do?name=CASENT0012712-D01	E.M.Sarnat	20-Jun-2005	Fiji			Mt. Kuitarua 470	Koro Island, Mudu District, Mt. Kuitarua, 3.7km NW Nasau Village	-17.292	179.403		470
ASAMI178-07	CASENT0012713-D01	Arthropoda	Insecta	Hymenoptera	Formicidae		Odontomachus	Odontomachus simillimus	Brian Fisher	bfisher@calacademy.org						Rokosalase	Malaise|in forest|1m|BOX-1938|http://www.antweb.org/specimen.do?name=CASENT0012713-D01	Schlinger, Tokota'a	23-Apr-2004	Fiji		Macuata	Rokosalase	Vanua Levu Island, 0.6 km S of Rokosalase Village	-16.533	179.018		180
ASAMI179-07	CASENT0012714-D01	Arthropoda	Insecta	Hymenoptera	Formicidae		Odontomachus	Odontomachus simillimus	Brian Fisher	bfisher@calacademy.org						Naboutini 300	winkler 1||1w|BOX-1938|http://www.antweb.org/specimen.do?name=CASENT0012714-D01	W.Naisilisili	15-Jul-2003	Fiji		Serua	Naboutini 300	Viti Levu, 1.8km NW Naboutini Village	-18.22	177.817		300
ASAMI180-07	CASENT0012714-D02	Arthropoda	Insecta	Hymenoptera	Formicidae		Odontomachus	Odontomachus simillimus	Brian Fisher	bfisher@calacademy.org						Naboutini 300	winkler 1||1w|BOX-1938|http://www.antweb.org/specimen.do?name=CASENT0012714-D02	W.Naisilisili	15-Jul-2003	Fiji		Serua	Naboutini 300	Viti Levu, 1.8km NW Naboutini Village	-18.22	177.817		300
ASAMI182-07	CASENT0012715-D02	Arthropoda	Insecta	Hymenoptera	Formicidae		Odontomachus	Odontomachus simillimus	Brian Fisher	bfisher@calacademy.org						Waivudawa 300	winkler 2||1w|BOX-1938|http://www.antweb.org/specimen.do?name=CASENT0012715-D02	M.Tokota'a	20-May-2002	Fiji			Waivudawa 300	Viti Levu, Waivudawa, 6.0km NNW Lami Town	-18.41	178.363		300
ASAMI183-07	CASENT0012716-D01	Arthropoda	Insecta	Hymenoptera	Formicidae		Odontomachus	Odontomachus simillimus	Brian Fisher	bfisher@calacademy.org						Nabukavesi 300	winkler 2||1w|BOX-1938|http://www.antweb.org/specimen.do?name=CASENT0012716-D01	A.Rakabula	23-May-2003	Fiji			Nabukavesi 300	Viti Levu, near Nabukavesi Village	-18.117	178.25		300
ASAMI184-07	CASENT0012716-D02	Arthropoda	Insecta	Hymenoptera	Formicidae		Odontomachus	Odontomachus simillimus	Brian Fisher	bfisher@calacademy.org						Nabukavesi 300	winkler 2||1w|BOX-1938|http://www.antweb.org/specimen.do?name=CASENT0012716-D02	A.Rakabula	23-May-2003	Fiji			Nabukavesi 300	Viti Levu, near Nabukavesi Village	-18.117	178.25		300
JDWAM841-05	CASENT0015325-D01	Arthropoda	Insecta	Hymenoptera	Formicidae		Anochetus	Anochetus goodmani	Brian Fisher	bfisher@calacademy.org						Kirindy Mite 80	EF19 sifted litter (leaf mold, rotten wood)|tropical dry forest|1w|BOX-0167|http://www.antweb.org/specimen.do?name=CASENT0015325-D01	Fisher-Griswold Arthropod Team	06-Dec-2001	Madagascar	Toliara		Kirindy Mite 80	Parc National de Kirindy Mite, 16.3 km 127° SE Belo sur Mer	-20.795	44.147		80
ASAM011-05	CASENT0015325-D02	Arthropoda	Insecta	Hymenoptera	Formicidae		Anochetus	Anochetus goodmani	Brian Fisher	bfisher@calacademy.org						Kirindy Mite 80	EF19 sifted litter (leaf mold, rotten wood)|tropical dry forest|1w|BOX-0168|http://www.antweb.org/specimen.do?name=CASENT0015325-D02	Fisher-Griswold Arthropod Team	06-Dec-2001	Madagascar	Toliara		Kirindy Mite 80	Parc National de Kirindy Mite, 16.3 km 127° SE Belo sur Mer	-20.795	44.147		80
JDWAM792-05	CASENT0017625-D01	Arthropoda	Insecta	Hymenoptera	Formicidae		Anochetus	Anochetus grandidieri	Brian Fisher	bfisher@calacademy.org						Bealoka 35	ER19 sifted litter (leaf mold, rotten wood)|gallery forest|1w|BOX-0167|http://www.antweb.org/specimen.do?name=CASENT0017625-D01	Fisher-Griswold Arthropod Team	03-Feb-2002	Madagascar	Toliara		Bealoka 35	Reserve Prive Berenty, Foret de Bealoka, Mandrare River, 14.6 km 329° NNW Amboasary	-24.957	46.272		35
JDWAM842-05	CASENT0022239-D01	Arthropoda	Insecta	Hymenoptera	Formicidae		Anochetus	Anochetus goodmani	Brian Fisher	bfisher@calacademy.org						Androngonibe 30	EF19 sifted litter (leaf mold, rotten wood)|tropical dry forest|1w|BOX-0167|http://www.antweb.org/specimen.do?name=CASENT0022239-D01	Fisher, Griswold et al.	19-Nov-2002	Madagascar	Mahajanga		Androngonibe 30	Reserve Speciale de Bemarivo, 23.8 km 223° SW Besalampy	-16.925	44.368		30
ASAM012-05	CASENT0022239-D02	Arthropoda	Insecta	Hymenoptera	Formicidae		Anochetus	Anochetus goodmani	Brian Fisher	bfisher@calacademy.org						Androngonibe 30	EF19 sifted litter (leaf mold, rotten wood)|tropical dry forest|1w|BOX-0168|http://www.antweb.org/specimen.do?name=CASENT0022239-D02	Fisher, Griswold et al.	19-Nov-2002	Madagascar	Mahajanga		Androngonibe 30	Reserve Speciale de Bemarivo, 23.8 km 223° SW Besalampy	-16.925	44.368		30
JDWAM793-05	CASENT0022242-D01	Arthropoda	Insecta	Hymenoptera	Formicidae		Anochetus	Anochetus grandidieri	Brian Fisher	bfisher@calacademy.org						Androngonibe 30	EF19 sifted litter (leaf mold, rotten wood)|tropical dry forest|1w|BOX-0167|http://www.antweb.org/specimen.do?name=CASENT0022242-D01	Fisher, Griswold et al.	19-Nov-2002	Madagascar	Mahajanga		Androngonibe 30	Reserve Speciale de Bemarivo, 23.8 km 223° SW Besalampy	-16.925	44.368		30
JDWAM794-05	CASENT0032649-D01	Arthropoda	Insecta	Hymenoptera	Formicidae		Anochetus	Anochetus grandidieri	Brian Fisher	bfisher@calacademy.org						Ambovonaomby 140	EF19 sifted litter (leaf mold, rotten wood)|tropical dry forest|1w|BOX-0167|http://www.antweb.org/specimen.do?name=CASENT0032649-D01	Fisher, Griswold et al.	04-Nov-2002	Madagascar	Mahajanga		Ambovonaomby 140	Parc National de Namoroka, 9.8 km 300° WNW Vilanandro	-16.467	45.35		140
JDWAM795-05	CASENT0033481-D01	Arthropoda	Insecta	Hymenoptera	Formicidae		Anochetus	Anochetus grandidieri	Brian Fisher	bfisher@calacademy.org						Anjanaharibe 470	EF19 sifted litter (leaf mold, rotten wood)|rainforest|1w|BOX-0167|http://www.antweb.org/specimen.do?name=CASENT0033481-D01	Fisher, Griswold et al.	08-Mar-2003	Madagascar	Toamasina		Anjanaharibe 470	Montagne d'Anjanaharibe, 18.0 km 21° NNE Ambinanitelo	-15.188	49.615		470
JDWAM796-05	CASENT0033490-D01	Arthropoda	Insecta	Hymenoptera	Formicidae		Anochetus	Anochetus grandidieri	Brian Fisher	bfisher@calacademy.org						Anjanaharibe 470	EF19 sifted litter (leaf mold, rotten wood)|rainforest|1w|BOX-0167|http://www.antweb.org/specimen.do?name=CASENT0033490-D01	Fisher, Griswold et al.	08-Mar-2003	Madagascar	Toamasina		Anjanaharibe 470	Montagne d'Anjanaharibe, 18.0 km 21° NNE Ambinanitelo	-15.188	49.615		470
JDWAM797-05	CASENT0034581-D01	Arthropoda	Insecta	Hymenoptera	Formicidae		Anochetus	Anochetus grandidieri	Brian Fisher	bfisher@calacademy.org						Akirindro 600	EC19 sifted litter (leaf mold, rotten wood)|rainforest|1w|BOX-0167|http://www.antweb.org/specimen.do?name=CASENT0034581-D01	Fisher, Griswold et al.	17-Mar-2003	Madagascar	Toamasina		Akirindro 600	Montagne d'Akirindro 7.6 km 341° NNW Ambinanitelo	-15.288	49.548		600
JDWAM798-05	CASENT0034592-D01	Arthropoda	Insecta	Hymenoptera	Formicidae		Anochetus	Anochetus grandidieri	Brian Fisher	bfisher@calacademy.org						Akirindro 600	EC19 sifted litter (leaf mold, rotten wood)|rainforest|1w|BOX-0167|http://www.antweb.org/specimen.do?name=CASENT0034592-D01	Fisher, Griswold et al.	17-Mar-2003	Madagascar	Toamasina		Akirindro 600	Montagne d'Akirindro 7.6 km 341° NNW Ambinanitelo	-15.288	49.548		600
ASAM869-05	CASENT0043293-D01	Arthropoda	Insecta	Hymenoptera	Formicidae		Odontomachus	Odontomachus coquereli	Brian Fisher	bfisher@calacademy.org						Binara 1100	EB09 sifted litter (leaf mold, rotten wood)|montane rainforest|1w|BOX-0422|http://www.antweb.org/specimen.do?name=CASENT0043293-D01	B.L.Fisher	05-Dec-2003	Madagascar	Antsiranana, Faritany d'		Binara 1100	Foret de Binara, 9.4km 235° SW Daraina	-13.263	49.6		1100
ASAM3265-05	CASENT0043293-D02	Arthropoda	Insecta	Hymenoptera	Formicidae		Odontomachus	Odontomachus coquereli	Brian Fisher	bfisher@calacademy.org						Binara 1100	EB09 sifted litter (leaf mold, rotten wood)|montane rainforest|right hind leg of worker|BOX-0588|http://www.antweb.org/specimen.do?name=CASENT0043293-D02	B.L.Fisher	05-Dec-2003	Madagascar	Antsiranana, Faritany d'		Binara 1100	Foret de Binara, 9.4km 235° SW Daraina	-13.263	49.6		1100
ASAM019-05	CASENT0043725-D01	Arthropoda	Insecta	Hymenoptera	Formicidae		Anochetus	Anochetus goodmani	Brian Fisher	bfisher@calacademy.org						Andavakoera 425	EC19 sifted litter (leaf mold, rotten wood)|rainforest|1w|BOX-0168|http://www.antweb.org/specimen.do?name=CASENT0043725-D01	B.L.Fisher	15-Dec-2003	Madagascar	Antsiranana, Faritany d'		Andavakoera 425	Foret d' Andavakoera, 21.4km 75° ENE Ambilobe; 4.6km 356° N Betsiaka	-13.118	49.23		425
ASAM020-05	CASENT0043725-D02	Arthropoda	Insecta	Hymenoptera	Formicidae		Anochetus	Anochetus goodmani	Brian Fisher	bfisher@calacademy.org						Andavakoera 425	EC19 sifted litter (leaf mold, rotten wood)|rainforest|1w|BOX-0168|http://www.antweb.org/specimen.do?name=CASENT0043725-D02	B.L.Fisher	15-Dec-2003	Madagascar	Antsiranana, Faritany d'		Andavakoera 425	Foret d' Andavakoera, 21.4km 75° ENE Ambilobe; 4.6km 356° N Betsiaka	-13.118	49.23		425
ASAM037-05	CASENT0045021-D01	Arthropoda	Insecta	Hymenoptera	Formicidae		Anochetus	Anochetus boltoni	Brian Fisher	bfisher@calacademy.org						Marojejy 450	EC19 sifted litter (leaf mold, rotten wood)|rainforest|middle right leg of mounted worker|BOX-0168|http://www.antweb.org/specimen.do?name=CASENT0045021-D01	B.L.Fisher et al.	12-Nov-2003	Madagascar	Antsiranana, Faritany d'		Marojejy 450	Parc National de Marojejy, Manantenina River, 28.0 km 38° NE Andapa, 8.2 km 333° NNW Manantenina	-14.437	49.775		450
JDWAM799-05	CASENT0047005-D01	Arthropoda	Insecta	Hymenoptera	Formicidae		Anochetus	Anochetus grandidieri	Brian Fisher	bfisher@calacademy.org						Torotorofotsy 1070	EB09 sifted litter (leaf mold, rotten wood)|montane rainforest, marsh edge|1w|BOX-0167|http://www.antweb.org/specimen.do?name=CASENT0047005-D01	Malagasy ant team	24-Mar-2004	Madagascar	Toamasina		Torotorofotsy 1070	Torotorofotsy	-18.871	48.347		1070
JDWAM800-05	CASENT0047010-D01	Arthropoda	Insecta	Hymenoptera	Formicidae		Anochetus	Anochetus grandidieri	Brian Fisher	bfisher@calacademy.org						Torotorofotsy 1070	EB09 sifted litter (leaf mold, rotten wood)|montane rainforest, marsh edge|1w|BOX-0167|http://www.antweb.org/specimen.do?name=CASENT0047010-D01	Malagasy ant team	24-Mar-2004	Madagascar	Toamasina		Torotorofotsy 1070	Torotorofotsy	-18.871	48.347		1070
JDWAM801-05	CASENT0047267-D01	Arthropoda	Insecta	Hymenoptera	Formicidae		Anochetus	Anochetus grandidieri	Brian Fisher	bfisher@calacademy.org						TampoloE3 10	EG10 sifted litter (leaf mold, rotten wood)|littoral forest|1w|BOX-0167|http://www.antweb.org/specimen.do?name=CASENT0047267-D01	Malagasy ant team	14-Apr-2004	Madagascar	Toamasina		TampoloE3 10	Parcelle E3 Tampolo	-17.283	49.433		10
ASAM871-05	CASENT0047466-D01	Arthropoda	Insecta	Hymenoptera	Formicidae		Odontomachus	Odontomachus troglodytes	Brian Fisher	bfisher@calacademy.org						TampoloE3 10	EG21 pitfall trap|littoral forest|1w|BOX-0422|http://www.antweb.org/specimen.do?name=CASENT0047466-D01	Malagasy ant team	14-Apr-2004	Madagascar	Toamasina		TampoloE3 10	Parcelle E3 Tampolo	-17.283	49.433		10
ASAM3273-05	CASENT0047484-D01	Arthropoda	Insecta	Hymenoptera	Formicidae		Odontomachus	Odontomachus coquereli	Brian Fisher	bfisher@calacademy.org						Ambohitsi 800	EB10 pitfall trap|montane rainforest|right hind leg of worker|BOX-0588|http://www.antweb.org/specimen.do?name=CASENT0047484-D01	D. Andriamalala, D. Silva, et al.	26-Feb-2003	Madagascar	Toamasina		Ambohitsi 800	Ambanizana, Parc National Masoala	-15.572	50.006		849
ASAM874-05	CASENT0048295-D01	Arthropoda	Insecta	Hymenoptera	Formicidae		Odontomachus	Odontomachus troglodytes	Brian Fisher	bfisher@calacademy.org						TampoloE3 10	EG13 ex rotten log|littoral forest|1p|BOX-0422|http://www.antweb.org/specimen.do?name=CASENT0048295-D01	Malagasy ant team	14-Apr-2004	Madagascar	Toamasina		TampoloE3 10	Parcelle E3 Tampolo	-17.283	49.433		10
ASAM860-05	CASENT0048894-D01	Arthropoda	Insecta	Hymenoptera	Formicidae		Odontomachus	Odontomachus coquereli	Brian Fisher	bfisher@calacademy.org						Marojejy 775	EC31 yellow pan trap|rainforest|1w|BOX-0422|http://www.antweb.org/specimen.do?name=CASENT0048894-D01	B.L.Fisher et al.	15-Nov-2003	Madagascar	Antsiranana, Faritany d'		Marojejy 775	Parc National de Marojejy, Manantenina River, 27.6 km 35° NE Andapa, 9.6 km 327° NNW Manantenina	-14.435	49.76		775
ASAM3281-05	CASENT0048894-D02	Arthropoda	Insecta	Hymenoptera	Formicidae		Odontomachus	Odontomachus coquereli	Brian Fisher	bfisher@calacademy.org						Marojejy 775	EC31 yellow pan trap|rainforest|right hind leg of worker|BOX-0588|http://www.antweb.org/specimen.do?name=CASENT0048894-D02	B.L.Fisher et al.	15-Nov-2003	Madagascar	Antsiranana, Faritany d'		Marojejy 775	Parc National de Marojejy, Manantenina River, 27.6 km 35° NE Andapa, 9.6 km 327° NNW Manantenina	-14.435	49.76		775
ASAM877-05	CASENT0048918-D01	Arthropoda	Insecta	Hymenoptera	Formicidae		Odontomachus	Odontomachus troglodytes	Brian Fisher	bfisher@calacademy.org						Tampolo 10	EG15 ex dead twig above ground|littoral forest|1w|BOX-0422|http://www.antweb.org/specimen.do?name=CASENT0048918-D01	Malagasy ant team	21-Apr-2004	Madagascar	Toamasina		Tampolo 10	Tampolo	-17.283	49.417		10
ASAM875-05	CASENT0048927-D01	Arthropoda	Insecta	Hymenoptera	Formicidae		Odontomachus	Odontomachus troglodytes	Brian Fisher	bfisher@calacademy.org						TampoloK7 10	EG13 ex rotten log|littoral forest|1p|BOX-0422|http://www.antweb.org/specimen.do?name=CASENT0048927-D01	Malagasy ant team	17-Apr-2004	Madagascar	Toamasina		TampoloK7 10	Parcelle K7 Tampolo	-17.283	49.417		10
ASAM876-05	CASENT0048928-D01	Arthropoda	Insecta	Hymenoptera	Formicidae		Odontomachus	Odontomachus troglodytes	Brian Fisher	bfisher@calacademy.org						Tampolo 10	EG13 ex rotten log|littoral forest|1w|BOX-0422|http://www.antweb.org/specimen.do?name=CASENT0048928-D01	Malagasy ant team	21-Apr-2004	Madagascar	Toamasina		Tampolo 10	Tampolo	-17.283	49.417		10
ASAM873-05	CASENT0049196-D01	Arthropoda	Insecta	Hymenoptera	Formicidae		Odontomachus	Odontomachus troglodytes	Brian Fisher	bfisher@calacademy.org						TampoloE3 10	EG13 ex rotten log|littoral forest|1w|BOX-0422|http://www.antweb.org/specimen.do?name=CASENT0049196-D01	Malagasy ant team	14-Apr-2004	Madagascar	Toamasina		TampoloE3 10	Parcelle E3 Tampolo	-17.283	49.433		10
ASAM872-05	CASENT0049201-D01	Arthropoda	Insecta	Hymenoptera	Formicidae		Odontomachus	Odontomachus troglodytes	Brian Fisher	bfisher@calacademy.org						TampoloE3 10	EG13 ex rotten log|littoral forest|1p|BOX-0422|http://www.antweb.org/specimen.do?name=CASENT0049201-D01	Malagasy ant team	14-Apr-2004	Madagascar	Toamasina		TampoloE3 10	Parcelle E3 Tampolo	-17.283	49.433		10
ASAM3284-05	CASENT0049291-D01	Arthropoda	Insecta	Hymenoptera	Formicidae		Odontomachus	Odontomachus coquereli	Brian Fisher	bfisher@calacademy.org						Akirindro 600	EC31 yellow pan trap|rainforest|right hind leg of worker|BOX-0588|http://www.antweb.org/specimen.do?name=CASENT0049291-D01	Fisher, Griswold et al.	17-Mar-2003	Madagascar	Toamasina		Akirindro 600	Montagne d'Akirindro 7.6 km 341° NNW Ambinanitelo	-15.288	49.548		600
ASAM3288-05	CASENT0049797-D01	Arthropoda	Insecta	Hymenoptera	Formicidae		Odontomachus	Odontomachus coquereli	Brian Fisher	bfisher@calacademy.org						Akirindro 600	EC28 Malaise trap|rainforest|right hind leg of male|BOX-0588|http://www.antweb.org/specimen.do?name=CASENT0049797-D01	Fisher, Griswold et al.	17-Mar-2003	Madagascar	Toamasina		Akirindro 600	Montagne d'Akirindro 7.6 km 341° NNW Ambinanitelo	-15.288	49.548		600
ASAMV006-06	CASENT0052053-D01	Arthropoda	Insecta	Hymenoptera	Formicidae		Anochetus	Anochetus grandidieri	Brian Fisher	bfisher@calacademy.org						MA-02-09A	malaise trap|high altitude rainforest|1m|BOX-0622|http://www.antweb.org/specimen.do?name=CASENT0052053-D01	R. Harin'Hala	26-Feb-2002	Madagascar	Fianarantsoa		MA-02-09A	Vohiparara broken bridge, Fianarantsoa Prov.	-21.226	47.37		1110
JDWAM226-05	CASENT0052518-D01	Arthropoda	Insecta	Hymenoptera	Formicidae		Anochetus	Anochetus madagascarensis	Brian Fisher	bfisher@calacademy.org						Ambohimanga 250	EF13 ex rotten log|tropical dry forest|1w|BOX-0052|http://www.antweb.org/specimen.do?name=CASENT0052518-D01	B.L.Fisher	13-Dec-2004	Madagascar	Mahajanga		Ambohimanga 250	Foret Ambohimanga, 26.1 km 314° Mampikony	-15.963	47.438		250
ASAM3308-05	CASENT0053772-D02	Arthropoda	Insecta	Hymenoptera	Formicidae		Odontomachus	Odontomachus coquereli	Brian Fisher	bfisher@calacademy.org						Marojejy 450	EC13 ex rotten log|rainforest|1w|BOX-0588|http://www.antweb.org/specimen.do?name=CASENT0053772-D02	B.L.Fisher	23-Nov-2004	Madagascar	Antsiranana, Faritany d'		Marojejy 450	Parc National de Marojejy, Manantenina River, 28.0 km 38° NE Andapa, 8.2 km 333° NNW Manantenina	-14.437	49.775		450
ASAM036-05	CASENT0053785-D02	Arthropoda	Insecta	Hymenoptera	Formicidae		Anochetus	Anochetus goodmani	Brian Fisher	bfisher@calacademy.org						Antsahabe 550	EF13 ex rotten log|tropical dry forest|1w|BOX-0168|http://www.antweb.org/specimen.do?name=CASENT0053785-D02	B.L.Fisher	17-Nov-2004	Madagascar	Antsiranana, Faritany d'		Antsahabe 550	Foret d' Antsahabe, 11.4km 275° W Daraina	-13.212	49.557		550
ASAM033-05	CASENT0053810-D01	Arthropoda	Insecta	Hymenoptera	Formicidae		Anochetus	Anochetus goodmani	Brian Fisher	bfisher@calacademy.org						Antsahabe 550	EF11 under stone|tropical dry forest|1p|BOX-0168|http://www.antweb.org/specimen.do?name=CASENT0053810-D01	B.L.Fisher	17-Nov-2004	Madagascar	Antsiranana, Faritany d'		Antsahabe 550	Foret d' Antsahabe, 11.4km 275° W Daraina	-13.212	49.557		550
ASAM034-05	CASENT0053810-D02	Arthropoda	Insecta	Hymenoptera	Formicidae		Anochetus	Anochetus goodmani	Brian Fisher	bfisher@calacademy.org						Antsahabe 550	EF11 under stone|tropical dry forest|1p|BOX-0168|http://www.antweb.org/specimen.do?name=CASENT0053810-D02	B.L.Fisher	17-Nov-2004	Madagascar	Antsiranana, Faritany d'		Antsahabe 550	Foret d' Antsahabe, 11.4km 275° W Daraina	-13.212	49.557		550
ASAM032-05	CASENT0053814-D02	Arthropoda	Insecta	Hymenoptera	Formicidae		Anochetus	Anochetus goodmani	Brian Fisher	bfisher@calacademy.org						Antsahabe 550	EF11 under stone|tropical dry forest|1w|BOX-0168|http://www.antweb.org/specimen.do?name=CASENT0053814-D02	B.L.Fisher	16-Nov-2004	Madagascar	Antsiranana, Faritany d'		Antsahabe 550	Foret d' Antsahabe, 11.4km 275° W Daraina	-13.212	49.557		550
ASAM3309-05	CASENT0053868-D02	Arthropoda	Insecta	Hymenoptera	Formicidae		Odontomachus	Odontomachus coquereli	Brian Fisher	bfisher@calacademy.org						Marojejy 450	EC13 ex rotten log|rainforest|1w|BOX-0588|http://www.antweb.org/specimen.do?name=CASENT0053868-D02	B.L.Fisher	23-Nov-2004	Madagascar	Antsiranana, Faritany d'		Marojejy 450	Parc National de Marojejy, Manantenina River, 28.0 km 38° NE Andapa, 8.2 km 333° NNW Manantenina	-14.437	49.775		450
ASAM035-05	CASENT0053884-D02	Arthropoda	Insecta	Hymenoptera	Formicidae		Anochetus	Anochetus goodmani	Brian Fisher	bfisher@calacademy.org						Antsahabe 550	EF11 under stone|tropical dry forest|1w|BOX-0168|http://www.antweb.org/specimen.do?name=CASENT0053884-D02	B.L.Fisher	17-Nov-2004	Madagascar	Antsiranana, Faritany d'		Antsahabe 550	Foret d' Antsahabe, 11.4km 275° W Daraina	-13.212	49.557		550
ASAM3319-05	CASENT0057008-D01	Arthropoda	Insecta	Hymenoptera	Formicidae		Odontomachus	Odontomachus coquereli	Brian Fisher	bfisher@calacademy.org						Akirindro 600	EC28 Malaise trap|rainforest|right hind leg of male|BOX-0588|http://www.antweb.org/specimen.do?name=CASENT0057008-D01	Fisher, Griswold et al.	17-Mar-2003	Madagascar	Toamasina		Akirindro 600	Montagne d'Akirindro 7.6 km 341° NNW Ambinanitelo	-15.288	49.548		600
ASAM3325-05	CASENT0059728-D01	Arthropoda	Insecta	Hymenoptera	Formicidae		Odontomachus	Odontomachus troglodytes	Brian Fisher	bfisher@calacademy.org						Vatovavy 175	ex rotten log|rainforest|right hind leg of worker|BOX-0588|http://www.antweb.org/specimen.do?name=CASENT0059728-D01	B.L.Fisher et al.	06-Jun-2005	Madagascar	Fianarantsoa		Vatovavy 175	7.6 km 122º Kianjavato, Foret Classee Vatovavy	-21.4	47.94		175
ASAM3011-05	CASENT0059939-D01	Arthropoda	Insecta	Hymenoptera	Formicidae		Anochetus	Anochetus madagascarensis	Brian Fisher	bfisher@calacademy.org						Vatovavy 175	ex rotten stick on ground|rainforest|1w|BOX-0569|http://www.antweb.org/specimen.do?name=CASENT0059939-D01	B.L.Fisher et al.	06-Jun-2005	Madagascar	Fianarantsoa		Vatovavy 175	7.6 km 122º Kianjavato, Foret Classee Vatovavy	-21.4	47.94		175
ASAMF722-06	CASENT0059939-D02	Arthropoda	Insecta	Hymenoptera	Formicidae		Anochetus	Anochetus madagascarensis	Brian Fisher	bfisher@calacademy.org						Vatovavy 175	ex rotten stick on ground|rainforest|1w|BOX-0621|http://www.antweb.org/specimen.do?name=CASENT0059939-D02	B.L.Fisher et al.	06-Jun-2005	Madagascar	Fianarantsoa		Vatovavy 175	7.6 km 122º Kianjavato, Foret Classee Vatovavy	-21.4	47.94		175
ASAM3014-05	CASENT0060006-D01	Arthropoda	Insecta	Hymenoptera	Formicidae		Anochetus	Anochetus madagascarensis	Brian Fisher	bfisher@calacademy.org						Vatovavy 175	ex rotten log|rainforest|1w|BOX-0569|http://www.antweb.org/specimen.do?name=CASENT0060006-D01	B.L.Fisher et al.	06-Jun-2005	Madagascar	Fianarantsoa		Vatovavy 175	7.6 km 122º Kianjavato, Foret Classee Vatovavy	-21.4	47.94		175
ASAM3016-05	CASENT0060008-D01	Arthropoda	Insecta	Hymenoptera	Formicidae		Anochetus	Anochetus madagascarensis	Brian Fisher	bfisher@calacademy.org						Vatovavy 175	ex rotting tree stump|rainforest|1w|BOX-0569|http://www.antweb.org/specimen.do?name=CASENT0060008-D01	B.L.Fisher et al.	06-Jun-2005	Madagascar	Fianarantsoa		Vatovavy 175	7.6 km 122º Kianjavato, Foret Classee Vatovavy	-21.4	47.94		175
ASAMF724-06	CASENT0060008-D02	Arthropoda	Insecta	Hymenoptera	Formicidae		Anochetus	Anochetus madagascarensis	Brian Fisher	bfisher@calacademy.org						Vatovavy 175	ex rotting tree stump|rainforest|1w|BOX-0621|http://www.antweb.org/specimen.do?name=CASENT0060008-D02	B.L.Fisher et al.	06-Jun-2005	Madagascar	Fianarantsoa		Vatovavy 175	7.6 km 122º Kianjavato, Foret Classee Vatovavy	-21.4	47.94		175
ASAM3017-05	CASENT0060009-D01	Arthropoda	Insecta	Hymenoptera	Formicidae		Anochetus	Anochetus madagascarensis	Brian Fisher	bfisher@calacademy.org						Vatovavy 175	under rotten log|rainforest|1w|BOX-0569|http://www.antweb.org/specimen.do?name=CASENT0060009-D01	B.L.Fisher et al.	06-Jun-2005	Madagascar	Fianarantsoa		Vatovavy 175	7.6 km 122º Kianjavato, Foret Classee Vatovavy	-21.4	47.94		175
ASAMV024-06	CASENT0060009-D02	Arthropoda	Insecta	Hymenoptera	Formicidae		Anochetus	Anochetus madagascarensis	Brian Fisher	bfisher@calacademy.org						Vatovavy 175	under rotten log|rainforest|1w|BOX-0622|http://www.antweb.org/specimen.do?name=CASENT0060009-D02	B.L.Fisher et al.	06-Jun-2005	Madagascar	Fianarantsoa		Vatovavy 175	7.6 km 122º Kianjavato, Foret Classee Vatovavy	-21.4	47.94		175
ASAM3018-05	CASENT0060011-D01	Arthropoda	Insecta	Hymenoptera	Formicidae		Anochetus	Anochetus madagascarensis	Brian Fisher	bfisher@calacademy.org						Vatovavy 175	ex rotten log|rainforest|1w|BOX-0569|http://www.antweb.org/specimen.do?name=CASENT0060011-D01	B.L.Fisher et al.	06-Jun-2005	Madagascar	Fianarantsoa		Vatovavy 175	7.6 km 122º Kianjavato, Foret Classee Vatovavy	-21.4	47.94		175
ASAMV025-06	CASENT0060011-D02	Arthropoda	Insecta	Hymenoptera	Formicidae		Anochetus	Anochetus madagascarensis	Brian Fisher	bfisher@calacademy.org						Vatovavy 175	ex rotten log|rainforest|1w|BOX-0622|http://www.antweb.org/specimen.do?name=CASENT0060011-D02	B.L.Fisher et al.	06-Jun-2005	Madagascar	Fianarantsoa		Vatovavy 175	7.6 km 122º Kianjavato, Foret Classee Vatovavy	-21.4	47.94		175
ASAM3019-05	CASENT0060012-D01	Arthropoda	Insecta	Hymenoptera	Formicidae		Anochetus	Anochetus madagascarensis	Brian Fisher	bfisher@calacademy.org						Vatovavy 175	ex rotten log|rainforest|1w|BOX-0569|http://www.antweb.org/specimen.do?name=CASENT0060012-D01	B.L.Fisher et al.	06-Jun-2005	Madagascar	Fianarantsoa		Vatovavy 175	7.6 km 122º Kianjavato, Foret Classee Vatovavy	-21.4	47.94		175
ASAM3020-05	CASENT0060014-D01	Arthropoda	Insecta	Hymenoptera	Formicidae		Anochetus	Anochetus madagascarensis	Brian Fisher	bfisher@calacademy.org						Vatovavy 175	ex rotten log|rainforest|1w|BOX-0569|http://www.antweb.org/specimen.do?name=CASENT0060014-D01	B.L.Fisher et al.	06-Jun-2005	Madagascar	Fianarantsoa		Vatovavy 175	7.6 km 122º Kianjavato, Foret Classee Vatovavy	-21.4	47.94		175
ASAM3337-05	CASENT0060021-D01	Arthropoda	Insecta	Hymenoptera	Formicidae		Odontomachus	Odontomachus troglodytes	Brian Fisher	bfisher@calacademy.org						Vatovavy 175	ground nest|rainforest|1w|BOX-0570|http://www.antweb.org/specimen.do?name=CASENT0060021-D01	B.L.Fisher et al.	06-Jun-2005	Madagascar	Fianarantsoa		Vatovavy 175	7.6 km 122º Kianjavato, Foret Classee Vatovavy	-21.4	47.94		175
ASAM3338-05	CASENT0060021-D02	Arthropoda	Insecta	Hymenoptera	Formicidae		Odontomachus	Odontomachus troglodytes	Brian Fisher	bfisher@calacademy.org						Vatovavy 175	ground nest|rainforest|right hind leg of worker|BOX-0588|http://www.antweb.org/specimen.do?name=CASENT0060021-D02	B.L.Fisher et al.	06-Jun-2005	Madagascar	Fianarantsoa		Vatovavy 175	7.6 km 122º Kianjavato, Foret Classee Vatovavy	-21.4	47.94		175
ASAM3339-05	CASENT0060021-D03	Arthropoda	Insecta	Hymenoptera	Formicidae		Odontomachus	Odontomachus troglodytes	Brian Fisher	bfisher@calacademy.org						Vatovavy 175	ground nest|rainforest|1w|BOX-0588|http://www.antweb.org/specimen.do?name=CASENT0060021-D03	B.L.Fisher et al.	06-Jun-2005	Madagascar	Fianarantsoa		Vatovavy 175	7.6 km 122º Kianjavato, Foret Classee Vatovavy	-21.4	47.94		175
ASAM3037-05	CASENT0060045-D01	Arthropoda	Insecta	Hymenoptera	Formicidae		Anochetus	Anochetus madagascarensis	Brian Fisher	bfisher@calacademy.org						Vatovavy 175	ex rotten log|rainforest|1w|BOX-0569|http://www.antweb.org/specimen.do?name=CASENT0060045-D01	B.L.Fisher et al.	06-Jun-2005	Madagascar	Fianarantsoa		Vatovavy 175	7.6 km 122º Kianjavato, Foret Classee Vatovavy	-21.4	47.94		175
ASAMV026-06	CASENT0060045-D02	Arthropoda	Insecta	Hymenoptera	Formicidae		Anochetus	Anochetus madagascarensis	Brian Fisher	bfisher@calacademy.org						Vatovavy 175	ex rotten log|rainforest|1w|BOX-0622|http://www.antweb.org/specimen.do?name=CASENT0060045-D02	B.L.Fisher et al.	06-Jun-2005	Madagascar	Fianarantsoa		Vatovavy 175	7.6 km 122º Kianjavato, Foret Classee Vatovavy	-21.4	47.94		175
ASAM3044-05	CASENT0060162-D01	Arthropoda	Insecta	Hymenoptera	Formicidae		Anochetus	Anochetus madagascarensis	Brian Fisher	bfisher@calacademy.org						Vatovavy 175	ex rotting tree stump|rainforest|1w|BOX-0569|http://www.antweb.org/specimen.do?name=CASENT0060162-D01	B.L.Fisher et al.	06-Jun-2005	Madagascar	Fianarantsoa		Vatovavy 175	7.6 km 122º Kianjavato, Foret Classee Vatovavy	-21.4	47.94		175
ASAM3045-05	CASENT0060165-D01	Arthropoda	Insecta	Hymenoptera	Formicidae		Anochetus	Anochetus madagascarensis	Brian Fisher	bfisher@calacademy.org						Vatovavy 175	ex rotten log|rainforest|1w|BOX-0569|http://www.antweb.org/specimen.do?name=CASENT0060165-D01	B.L.Fisher et al.	06-Jun-2005	Madagascar	Fianarantsoa		Vatovavy 175	7.6 km 122º Kianjavato, Foret Classee Vatovavy	-21.4	47.94		175
ASAMF730-06	CASENT0060165-D02	Arthropoda	Insecta	Hymenoptera	Formicidae		Anochetus	Anochetus madagascarensis	Brian Fisher	bfisher@calacademy.org						Vatovavy 175	ex rotten log|rainforest|1w|BOX-0621|http://www.antweb.org/specimen.do?name=CASENT0060165-D02	B.L.Fisher et al.	06-Jun-2005	Madagascar	Fianarantsoa		Vatovavy 175	7.6 km 122º Kianjavato, Foret Classee Vatovavy	-21.4	47.94		175
ASAM3047-05	CASENT0060171-D01	Arthropoda	Insecta	Hymenoptera	Formicidae		Anochetus	Anochetus madagascarensis	Brian Fisher	bfisher@calacademy.org						Vatovavy 175	ex rotten log|rainforest|1w|BOX-0569|http://www.antweb.org/specimen.do?name=CASENT0060171-D01	B.L.Fisher et al.	06-Jun-2005	Madagascar	Fianarantsoa		Vatovavy 175	7.6 km 122º Kianjavato, Foret Classee Vatovavy	-21.4	47.94		175
ASAM3049-05	CASENT0060180-D01	Arthropoda	Insecta	Hymenoptera	Formicidae		Anochetus	Anochetus grandidieri	Brian Fisher	bfisher@calacademy.org						Vatovavy 175	ex rotten stick on ground|rainforest|1w|BOX-0569|http://www.antweb.org/specimen.do?name=CASENT0060180-D01	B.L.Fisher et al.	06-Jun-2005	Madagascar	Fianarantsoa		Vatovavy 175	7.6 km 122º Kianjavato, Foret Classee Vatovavy	-21.4	47.94		175
ASAM3053-05	CASENT0060292-D01	Arthropoda	Insecta	Hymenoptera	Formicidae		Anochetus	Anochetus madagascarensis	Brian Fisher	bfisher@calacademy.org						Vatovavy 175	ex rotten log|rainforest|1w|BOX-0569|http://www.antweb.org/specimen.do?name=CASENT0060292-D01	B.L.Fisher et al.	06-Jun-2005	Madagascar	Fianarantsoa		Vatovavy 175	7.6 km 122º Kianjavato, Foret Classee Vatovavy	-21.4	47.94		175
ASAMF731-06	CASENT0060292-D02	Arthropoda	Insecta	Hymenoptera	Formicidae		Anochetus	Anochetus madagascarensis	Brian Fisher	bfisher@calacademy.org						Vatovavy 175	ex rotten log|rainforest|1w|BOX-0621|http://www.antweb.org/specimen.do?name=CASENT0060292-D02	B.L.Fisher et al.	06-Jun-2005	Madagascar	Fianarantsoa		Vatovavy 175	7.6 km 122º Kianjavato, Foret Classee Vatovavy	-21.4	47.94		175
ASAM3076-05	CASENT0060493-D01	Arthropoda	Insecta	Hymenoptera	Formicidae		Anochetus	Anochetus madagascarensis	Brian Fisher	bfisher@calacademy.org						Vatovavy 175	ex rotten log|rainforest|1w|BOX-0569|http://www.antweb.org/specimen.do?name=CASENT0060493-D01	B.L.Fisher et al.	06-Jun-2005	Madagascar	Fianarantsoa		Vatovavy 175	7.6 km 122º Kianjavato, Foret Classee Vatovavy	-21.4	47.94		175
ASAMF732-06	CASENT0060493-D02	Arthropoda	Insecta	Hymenoptera	Formicidae		Anochetus	Anochetus madagascarensis	Brian Fisher	bfisher@calacademy.org						Vatovavy 175	ex rotten log|rainforest|1w|BOX-0621|http://www.antweb.org/specimen.do?name=CASENT0060493-D02	B.L.Fisher et al.	06-Jun-2005	Madagascar	Fianarantsoa		Vatovavy 175	7.6 km 122º Kianjavato, Foret Classee Vatovavy	-21.4	47.94		175
ASAMF733-06	CASENT0060755-D01	Arthropoda	Insecta	Hymenoptera	Formicidae		Anochetus	Anochetus grandidieri	Brian Fisher	bfisher@calacademy.org						Vatovavy 175	sifted litter (leaf mold, rotten wood)|rainforest|1w|BOX-0620|http://www.antweb.org/specimen.do?name=CASENT0060755-D01	B.L.Fisher et al.	06-Jun-2005	Madagascar	Fianarantsoa		Vatovavy 175	7.6 km 122º Kianjavato, Foret Classee Vatovavy	-21.4	47.94		175
ASAMF734-06	CASENT0060756-D01	Arthropoda	Insecta	Hymenoptera	Formicidae		Anochetus	Anochetus grandidieri	Brian Fisher	bfisher@calacademy.org						Vatovavy 175	sifted litter (leaf mold, rotten wood)|rainforest|1w|BOX-0620|http://www.antweb.org/specimen.do?name=CASENT0060756-D01	B.L.Fisher et al.	06-Jun-2005	Madagascar	Fianarantsoa		Vatovavy 175	7.6 km 122º Kianjavato, Foret Classee Vatovavy	-21.4	47.94		175
ASAMF735-06	CASENT0060757-D01	Arthropoda	Insecta	Hymenoptera	Formicidae		Anochetus	Anochetus grandidieri	Brian Fisher	bfisher@calacademy.org						Vatovavy 175	sifted litter (leaf mold, rotten wood)|rainforest|1w|BOX-0620|http://www.antweb.org/specimen.do?name=CASENT0060757-D01	B.L.Fisher et al.	06-Jun-2005	Madagascar	Fianarantsoa		Vatovavy 175	7.6 km 122º Kianjavato, Foret Classee Vatovavy	-21.4	47.94		175
ASAMF736-06	CASENT0060758-D01	Arthropoda	Insecta	Hymenoptera	Formicidae		Anochetus	Anochetus grandidieri	Brian Fisher	bfisher@calacademy.org						Vatovavy 175	sifted litter (leaf mold, rotten wood)|rainforest|1w|BOX-0620|http://www.antweb.org/specimen.do?name=CASENT0060758-D01	B.L.Fisher et al.	06-Jun-2005	Madagascar	Fianarantsoa		Vatovavy 175	7.6 km 122º Kianjavato, Foret Classee Vatovavy	-21.4	47.94		175
ASAMF737-06	CASENT0060864-D01	Arthropoda	Insecta	Hymenoptera	Formicidae		Anochetus	Anochetus grandidieri	Brian Fisher	bfisher@calacademy.org						Andrambovato 1075	ex rotten log|montane rainforest|1w|BOX-0620|http://www.antweb.org/specimen.do?name=CASENT0060864-D01	B.L.Fisher et al.	03-Jun-2005	Madagascar	Fianarantsoa		Andrambovato 1075	2km W Andrambovato, along river Tatamaly	-21.512	47.41		1075
ASAMF738-06	CASENT0060867-D01	Arthropoda	Insecta	Hymenoptera	Formicidae		Anochetus	Anochetus grandidieri	Brian Fisher	bfisher@calacademy.org						Andrambovato 1075	ex rotten log|montane rainforest|1w|BOX-0620|http://www.antweb.org/specimen.do?name=CASENT0060867-D01	B.L.Fisher et al.	03-Jun-2005	Madagascar	Fianarantsoa		Andrambovato 1075	2km W Andrambovato, along river Tatamaly	-21.512	47.41		1075
ASAMF739-06	CASENT0060909-D01	Arthropoda	Insecta	Hymenoptera	Formicidae		Anochetus	Anochetus grandidieri	Brian Fisher	bfisher@calacademy.org						Vatovavy 175	sifted litter (leaf mold, rotten wood)|rainforest|1w|BOX-0620|http://www.antweb.org/specimen.do?name=CASENT0060909-D01	B.L.Fisher et al.	06-Jun-2005	Madagascar	Fianarantsoa		Vatovavy 175	7.6 km 122º Kianjavato, Foret Classee Vatovavy	-21.4	47.94		175
ASAMF740-06	CASENT0060913-D01	Arthropoda	Insecta	Hymenoptera	Formicidae		Anochetus	Anochetus grandidieri	Brian Fisher	bfisher@calacademy.org						Andrambovato 1075	sifted litter (leaf mold, rotten wood)|montane rainforest|1w|BOX-0620|http://www.antweb.org/specimen.do?name=CASENT0060913-D01	B.L.Fisher et al.	03-Jun-2005	Madagascar	Fianarantsoa		Andrambovato 1075	2km W Andrambovato, along river Tatamaly	-21.512	47.41		1075
ASAMF741-06	CASENT0060986-D01	Arthropoda	Insecta	Hymenoptera	Formicidae		Anochetus	Anochetus grandidieri	Brian Fisher	bfisher@calacademy.org						Vatovavy 175	sifted litter (leaf mold, rotten wood)|rainforest|1w|BOX-0620|http://www.antweb.org/specimen.do?name=CASENT0060986-D01	B.L.Fisher et al.	06-Jun-2005	Madagascar	Fianarantsoa		Vatovavy 175	7.6 km 122º Kianjavato, Foret Classee Vatovavy	-21.4	47.94		175
ASAMF742-06	CASENT0060987-D01	Arthropoda	Insecta	Hymenoptera	Formicidae		Anochetus	Anochetus grandidieri	Brian Fisher	bfisher@calacademy.org						Vatovavy 175	sifted litter (leaf mold, rotten wood)|rainforest|1w|BOX-0620|http://www.antweb.org/specimen.do?name=CASENT0060987-D01	B.L.Fisher et al.	06-Jun-2005	Madagascar	Fianarantsoa		Vatovavy 175	7.6 km 122º Kianjavato, Foret Classee Vatovavy	-21.4	47.94		175
ASAMF743-06	CASENT0060988-D01	Arthropoda	Insecta	Hymenoptera	Formicidae		Anochetus	Anochetus grandidieri	Brian Fisher	bfisher@calacademy.org						Vatovavy 175	sifted litter (leaf mold, rotten wood)|rainforest|1w|BOX-0620|http://www.antweb.org/specimen.do?name=CASENT0060988-D01	B.L.Fisher et al.	06-Jun-2005	Madagascar	Fianarantsoa		Vatovavy 175	7.6 km 122º Kianjavato, Foret Classee Vatovavy	-21.4	47.94		175
ASAMF744-06	CASENT0060989-D01	Arthropoda	Insecta	Hymenoptera	Formicidae		Anochetus	Anochetus grandidieri	Brian Fisher	bfisher@calacademy.org						Vatovavy 175	sifted litter (leaf mold, rotten wood)|rainforest|1w|BOX-0620|http://www.antweb.org/specimen.do?name=CASENT0060989-D01	B.L.Fisher et al.	06-Jun-2005	Madagascar	Fianarantsoa		Vatovavy 175	7.6 km 122º Kianjavato, Foret Classee Vatovavy	-21.4	47.94		175
ASAMF745-06	CASENT0060990-D01	Arthropoda	Insecta	Hymenoptera	Formicidae		Anochetus	Anochetus grandidieri	Brian Fisher	bfisher@calacademy.org						Vatovavy 175	sifted litter (leaf mold, rotten wood)|rainforest|1w|BOX-0620|http://www.antweb.org/specimen.do?name=CASENT0060990-D01	B.L.Fisher et al.	06-Jun-2005	Madagascar	Fianarantsoa		Vatovavy 175	7.6 km 122º Kianjavato, Foret Classee Vatovavy	-21.4	47.94		175
ASAMF746-06	CASENT0061064-D01	Arthropoda	Insecta	Hymenoptera	Formicidae		Anochetus	Anochetus grandidieri	Brian Fisher	bfisher@calacademy.org						Vatovavy 175	sifted litter (leaf mold, rotten wood)|rainforest|1w|BOX-0620|http://www.antweb.org/specimen.do?name=CASENT0061064-D01	B.L.Fisher et al.	06-Jun-2005	Madagascar	Fianarantsoa		Vatovavy 175	7.6 km 122º Kianjavato, Foret Classee Vatovavy	-21.4	47.94		175
ASAMF747-06	CASENT0061065-D01	Arthropoda	Insecta	Hymenoptera	Formicidae		Anochetus	Anochetus grandidieri	Brian Fisher	bfisher@calacademy.org						Vatovavy 175	sifted litter (leaf mold, rotten wood)|rainforest|1w|BOX-0620|http://www.antweb.org/specimen.do?name=CASENT0061065-D01	B.L.Fisher et al.	06-Jun-2005	Madagascar	Fianarantsoa		Vatovavy 175	7.6 km 122º Kianjavato, Foret Classee Vatovavy	-21.4	47.94		175
ASAMF748-06	CASENT0061066-D01	Arthropoda	Insecta	Hymenoptera	Formicidae		Anochetus	Anochetus grandidieri	Brian Fisher	bfisher@calacademy.org						Vatovavy 175	sifted litter (leaf mold, rotten wood)|rainforest|1w|BOX-0620|http://www.antweb.org/specimen.do?name=CASENT0061066-D01	B.L.Fisher et al.	06-Jun-2005	Madagascar	Fianarantsoa		Vatovavy 175	7.6 km 122º Kianjavato, Foret Classee Vatovavy	-21.4	47.94		175
ASAMF749-06	CASENT0061067-D01	Arthropoda	Insecta	Hymenoptera	Formicidae		Anochetus	Anochetus madagascarensis	Brian Fisher	bfisher@calacademy.org						Vatovavy 175	sifted litter (leaf mold, rotten wood)|rainforest|1w|BOX-0620|http://www.antweb.org/specimen.do?name=CASENT0061067-D01	B.L.Fisher et al.	06-Jun-2005	Madagascar	Fianarantsoa		Vatovavy 175	7.6 km 122º Kianjavato, Foret Classee Vatovavy	-21.4	47.94		175
ASAMF750-06	CASENT0061110-D01	Arthropoda	Insecta	Hymenoptera	Formicidae		Anochetus	Anochetus madagascarensis	Brian Fisher	bfisher@calacademy.org						Vatovavy 175	sifted litter (leaf mold, rotten wood)|rainforest|1w|BOX-0620|http://www.antweb.org/specimen.do?name=CASENT0061110-D01	B.L.Fisher et al.	06-Jun-2005	Madagascar	Fianarantsoa		Vatovavy 175	7.6 km 122º Kianjavato, Foret Classee Vatovavy	-21.4	47.94		175
ASAMF751-06	CASENT0061111-D01	Arthropoda	Insecta	Hymenoptera	Formicidae		Anochetus	Anochetus grandidieri	Brian Fisher	bfisher@calacademy.org						Vatovavy 175	sifted litter (leaf mold, rotten wood)|rainforest|1w|BOX-0620|http://www.antweb.org/specimen.do?name=CASENT0061111-D01	B.L.Fisher et al.	06-Jun-2005	Madagascar	Fianarantsoa		Vatovavy 175	7.6 km 122º Kianjavato, Foret Classee Vatovavy	-21.4	47.94		175
ASAMF752-06	CASENT0061112-D01	Arthropoda	Insecta	Hymenoptera	Formicidae		Anochetus	Anochetus grandidieri	Brian Fisher	bfisher@calacademy.org						Vatovavy 175	sifted litter (leaf mold, rotten wood)|rainforest|1w|BOX-0620|http://www.antweb.org/specimen.do?name=CASENT0061112-D01	B.L.Fisher et al.	06-Jun-2005	Madagascar	Fianarantsoa		Vatovavy 175	7.6 km 122º Kianjavato, Foret Classee Vatovavy	-21.4	47.94		175
ASAMF753-06	CASENT0061156-D01	Arthropoda	Insecta	Hymenoptera	Formicidae		Anochetus	Anochetus madagascarensis	Brian Fisher	bfisher@calacademy.org						Vatovavy 175	sifted litter (leaf mold, rotten wood)|rainforest|1w|BOX-0620|http://www.antweb.org/specimen.do?name=CASENT0061156-D01	B.L.Fisher et al.	06-Jun-2005	Madagascar	Fianarantsoa		Vatovavy 175	7.6 km 122º Kianjavato, Foret Classee Vatovavy	-21.4	47.94		175
ASAMF754-06	CASENT0061157-D01	Arthropoda	Insecta	Hymenoptera	Formicidae		Anochetus	Anochetus grandidieri	Brian Fisher	bfisher@calacademy.org						Vatovavy 175	sifted litter (leaf mold, rotten wood)|rainforest|1w|BOX-0620|http://www.antweb.org/specimen.do?name=CASENT0061157-D01	B.L.Fisher et al.	06-Jun-2005	Madagascar	Fianarantsoa		Vatovavy 175	7.6 km 122º Kianjavato, Foret Classee Vatovavy	-21.4	47.94		175
ASAMF755-06	CASENT0061158-D01	Arthropoda	Insecta	Hymenoptera	Formicidae		Anochetus	Anochetus grandidieri	Brian Fisher	bfisher@calacademy.org						Vatovavy 175	sifted litter (leaf mold, rotten wood)|rainforest|1w|BOX-0620|http://www.antweb.org/specimen.do?name=CASENT0061158-D01	B.L.Fisher et al.	06-Jun-2005	Madagascar	Fianarantsoa		Vatovavy 175	7.6 km 122º Kianjavato, Foret Classee Vatovavy	-21.4	47.94		175
ASAMF756-06	CASENT0061159-D01	Arthropoda	Insecta	Hymenoptera	Formicidae		Anochetus	Anochetus grandidieri	Brian Fisher	bfisher@calacademy.org						Vatovavy 175	sifted litter (leaf mold, rotten wood)|rainforest|1w|BOX-0620|http://www.antweb.org/specimen.do?name=CASENT0061159-D01	B.L.Fisher et al.	06-Jun-2005	Madagascar	Fianarantsoa		Vatovavy 175	7.6 km 122º Kianjavato, Foret Classee Vatovavy	-21.4	47.94		175
ASAMF758-06	CASENT0061274-D01	Arthropoda	Insecta	Hymenoptera	Formicidae		Anochetus	Anochetus grandidieri	Brian Fisher	bfisher@calacademy.org						Andrambovato 1075	sifted litter (leaf mold, rotten wood)|montane rainforest|1w|BOX-0620|http://www.antweb.org/specimen.do?name=CASENT0061274-D01	B.L.Fisher et al.	03-Jun-2005	Madagascar	Fianarantsoa		Andrambovato 1075	2km W Andrambovato, along river Tatamaly	-21.512	47.41		1075
ASAMF759-06	CASENT0061294-D01	Arthropoda	Insecta	Hymenoptera	Formicidae		Anochetus	Anochetus grandidieri	Brian Fisher	bfisher@calacademy.org						Vatovavy 175	sifted litter (leaf mold, rotten wood)|rainforest|1w|BOX-0620|http://www.antweb.org/specimen.do?name=CASENT0061294-D01	B.L.Fisher et al.	06-Jun-2005	Madagascar	Fianarantsoa		Vatovavy 175	7.6 km 122º Kianjavato, Foret Classee Vatovavy	-21.4	47.94		175
ASAMF760-06	CASENT0061295-D01	Arthropoda	Insecta	Hymenoptera	Formicidae		Anochetus	Anochetus grandidieri	Brian Fisher	bfisher@calacademy.org						Vatovavy 175	sifted litter (leaf mold, rotten wood)|rainforest|1w|BOX-0620|http://www.antweb.org/specimen.do?name=CASENT0061295-D01	B.L.Fisher et al.	06-Jun-2005	Madagascar	Fianarantsoa		Vatovavy 175	7.6 km 122º Kianjavato, Foret Classee Vatovavy	-21.4	47.94		175
ASAMF761-06	CASENT0061296-D01	Arthropoda	Insecta	Hymenoptera	Formicidae		Anochetus	Anochetus grandidieri	Brian Fisher	bfisher@calacademy.org						Vatovavy 175	sifted litter (leaf mold, rotten wood)|rainforest|1w|BOX-0620|http://www.antweb.org/specimen.do?name=CASENT0061296-D01	B.L.Fisher et al.	06-Jun-2005	Madagascar	Fianarantsoa		Vatovavy 175	7.6 km 122º Kianjavato, Foret Classee Vatovavy	-21.4	47.94		175
ASAMF762-06	CASENT0061337-D01	Arthropoda	Insecta	Hymenoptera	Formicidae		Anochetus	Anochetus grandidieri	Brian Fisher	bfisher@calacademy.org						Andrambovato 1075	sifted litter (leaf mold, rotten wood)|montane rainforest|1w|BOX-0620|http://www.antweb.org/specimen.do?name=CASENT0061337-D01	B.L.Fisher et al.	03-Jun-2005	Madagascar	Fianarantsoa		Andrambovato 1075	2km W Andrambovato, along river Tatamaly	-21.512	47.41		1075
ASAMF763-06	CASENT0061448-D01	Arthropoda	Insecta	Hymenoptera	Formicidae		Anochetus	Anochetus grandidieri	Brian Fisher	bfisher@calacademy.org						Andrambovato 1075	sifted litter (leaf mold, rotten wood)|montane rainforest|1w|BOX-0620|http://www.antweb.org/specimen.do?name=CASENT0061448-D01	B.L.Fisher et al.	03-Jun-2005	Madagascar	Fianarantsoa		Andrambovato 1075	2km W Andrambovato, along river Tatamaly	-21.512	47.41		1075
ASAMF764-06	CASENT0061487-D01	Arthropoda	Insecta	Hymenoptera	Formicidae		Anochetus	Anochetus grandidieri	Brian Fisher	bfisher@calacademy.org						Andrambovato 1075	sifted litter (leaf mold, rotten wood)|montane rainforest|1w|BOX-0620|http://www.antweb.org/specimen.do?name=CASENT0061487-D01	B.L.Fisher et al.	03-Jun-2005	Madagascar	Fianarantsoa		Andrambovato 1075	2km W Andrambovato, along river Tatamaly	-21.512	47.41		1075
ASAMX291-06	CASENT0064429-D01	Arthropoda	Insecta	Hymenoptera	Formicidae		Anochetus	Anochetus boltoni	Brian Fisher	bfisher@calacademy.org						Marojejy 488	Malaise|rainforest|right hind leg of male|BOX-1233|http://www.antweb.org/specimen.do?name=CASENT0064429-D01	Rin'Ha, Irwin	28-Apr-2005	Madagascar	Antsiranana, Faritany d'		Marojejy 488	Parc National Marojejy	-14.438	49.774		488
ASAMF773-06	CASENT0066509-D01	Arthropoda	Insecta	Hymenoptera	Formicidae		Odontomachus	Odontomachus troglodytes	Brian Fisher	bfisher@calacademy.org						Ambohidena 20	ex rotten log|coastal scrub|1w|BOX-0620|http://www.antweb.org/specimen.do?name=CASENT0066509-D01	B.L.Fisher et al.	21-Nov-2005	Madagascar	Toamasina		Ambohidena 20	Ile Sainte Marie, Foret Ambohidena, 22.8 km 44° Ambodifotatra	-16.824	49.964		20
ASAMF779-06	CASENT0066816-D01	Arthropoda	Insecta	Hymenoptera	Formicidae		Anochetus	Anochetus grandidieri	Brian Fisher	bfisher@calacademy.org						Mandrisy	ex rotten log|littoral rainforest|1w|BOX-0620|http://www.antweb.org/specimen.do?name=CASENT0066816-D01	B.L.Fisher et al.	13-Nov-2005	Madagascar	Toamasina		Mandrisy	Foret d'Analava Mandrisy, 5.9 km 195ºAntanambe	-16.486	49.847		10
ASAMF780-06	CASENT0066817-D01	Arthropoda	Insecta	Hymenoptera	Formicidae		Anochetus	Anochetus grandidieri	Brian Fisher	bfisher@calacademy.org						Mandrisy	ex leaf above ground|littoral rainforest|1w|BOX-0620|http://www.antweb.org/specimen.do?name=CASENT0066817-D01	B.L.Fisher et al.	13-Nov-2005	Madagascar	Toamasina		Mandrisy	Foret d'Analava Mandrisy, 5.9 km 195ºAntanambe	-16.486	49.847		10
ASAMF781-06	CASENT0066818-D01	Arthropoda	Insecta	Hymenoptera	Formicidae		Odontomachus	Odontomachus troglodytes	Brian Fisher	bfisher@calacademy.org						Mandrisy	under log in sandy soil|coastal scrub|1w|BOX-0620|http://www.antweb.org/specimen.do?name=CASENT0066818-D01	B.L.Fisher et al.	13-Nov-2005	Madagascar	Toamasina		Mandrisy	Foret d'Analava Mandrisy, 5.9 km 195ºAntanambe	-16.486	49.847		10
ASAMF782-06	CASENT0066819-D01	Arthropoda	Insecta	Hymenoptera	Formicidae		Odontomachus	Odontomachus troglodytes	Brian Fisher	bfisher@calacademy.org						Mandrisy	ex rotten log|littoral rainforest|1w|BOX-0620|http://www.antweb.org/specimen.do?name=CASENT0066819-D01	B.L.Fisher et al.	13-Nov-2005	Madagascar	Toamasina		Mandrisy	Foret d'Analava Mandrisy, 5.9 km 195ºAntanambe	-16.486	49.847		10
ASAMF784-06	CASENT0066820-D01	Arthropoda	Insecta	Hymenoptera	Formicidae		Odontomachus	Odontomachus troglodytes	Brian Fisher	bfisher@calacademy.org						Mandrisy	ex rotten log|littoral rainforest|1w|BOX-0620|http://www.antweb.org/specimen.do?name=CASENT0066820-D01	B.L.Fisher et al.	13-Nov-2005	Madagascar	Toamasina		Mandrisy	Foret d'Analava Mandrisy, 5.9 km 195ºAntanambe	-16.486	49.847		10
ASAMF785-06	CASENT0066820-D02	Arthropoda	Insecta	Hymenoptera	Formicidae		Odontomachus	Odontomachus troglodytes	Brian Fisher	bfisher@calacademy.org						Mandrisy	ex rotten log|littoral rainforest|1l|BOX-0620|http://www.antweb.org/specimen.do?name=CASENT0066820-D02	B.L.Fisher et al.	13-Nov-2005	Madagascar	Toamasina		Mandrisy	Foret d'Analava Mandrisy, 5.9 km 195ºAntanambe	-16.486	49.847		10
ASAMF786-06	CASENT0066821-D01	Arthropoda	Insecta	Hymenoptera	Formicidae		Odontomachus	Odontomachus troglodytes	Brian Fisher	bfisher@calacademy.org						Mandrisy	ex rotten log|littoral rainforest|1w|BOX-0620|http://www.antweb.org/specimen.do?name=CASENT0066821-D01	B.L.Fisher et al.	13-Nov-2005	Madagascar	Toamasina		Mandrisy	Foret d'Analava Mandrisy, 5.9 km 195ºAntanambe	-16.486	49.847		10
ASAMF787-06	CASENT0066822-D01	Arthropoda	Insecta	Hymenoptera	Formicidae		Anochetus	Anochetus grandidieri	Brian Fisher	bfisher@calacademy.org						Mandrisy	ex rotten log|littoral rainforest|1w|BOX-0620|http://www.antweb.org/specimen.do?name=CASENT0066822-D01	B.L.Fisher et al.	13-Nov-2005	Madagascar	Toamasina		Mandrisy	Foret d'Analava Mandrisy, 5.9 km 195ºAntanambe	-16.486	49.847		10
ASAMF788-06	CASENT0066822-D02	Arthropoda	Insecta	Hymenoptera	Formicidae		Anochetus	Anochetus grandidieri	Brian Fisher	bfisher@calacademy.org						Mandrisy	ex rotten log|littoral rainforest|1l|BOX-0620|http://www.antweb.org/specimen.do?name=CASENT0066822-D02	B.L.Fisher et al.	13-Nov-2005	Madagascar	Toamasina		Mandrisy	Foret d'Analava Mandrisy, 5.9 km 195ºAntanambe	-16.486	49.847		10
ASAMF789-06	CASENT0066824-D01	Arthropoda	Insecta	Hymenoptera	Formicidae		Odontomachus	Odontomachus troglodytes	Brian Fisher	bfisher@calacademy.org						Mandrisy	ground forager(s)|littoral rainforest|1w|BOX-0620|http://www.antweb.org/specimen.do?name=CASENT0066824-D01	B.L.Fisher et al.	13-Nov-2005	Madagascar	Toamasina		Mandrisy	Foret d'Analava Mandrisy, 5.9 km 195ºAntanambe	-16.486	49.847		10
ASAMF790-06	CASENT0066826-D01	Arthropoda	Insecta	Hymenoptera	Formicidae		Anochetus	Anochetus madagascarensis	Brian Fisher	bfisher@calacademy.org						Ambodiriana 125	ground forager(s)|rainforest|1w|BOX-0620|http://www.antweb.org/specimen.do?name=CASENT0066826-D01	B.L.Fisher et al.	18-Nov-2005	Madagascar	Toamasina		Ambodiriana 125	Res. Ambodiriana, 4.8 km 306°Manompana, along Manompana river	-16.672	49.701		125
ASAMF791-06	CASENT0066827-D01	Arthropoda	Insecta	Hymenoptera	Formicidae		Odontomachus	Odontomachus troglodytes	Brian Fisher	bfisher@calacademy.org						Ambodiriana 125	ex rotten log|rainforest|1w|BOX-0620|http://www.antweb.org/specimen.do?name=CASENT0066827-D01	B.L.Fisher et al.	18-Nov-2005	Madagascar	Toamasina		Ambodiriana 125	Res. Ambodiriana, 4.8 km 306°Manompana, along Manompana river	-16.672	49.701		125
ASAMF794-06	CASENT0066831-D01	Arthropoda	Insecta	Hymenoptera	Formicidae		Anochetus	Anochetus grandidieri	Brian Fisher	bfisher@calacademy.org						Mananara-Nord 225	under moss on rotten log on ground|rainforest|1w|BOX-0620|http://www.antweb.org/specimen.do?name=CASENT0066831-D01	B.L.Fisher et al.	15-Nov-2005	Madagascar	Toamasina		Mananara-Nord 225	Parc National Mananara-Nord, 7.1 km 261° Antanambe	-16.455	49.788		225
ASAMF795-06	CASENT0066832-D01	Arthropoda	Insecta	Hymenoptera	Formicidae		Anochetus	Anochetus grandidieri	Brian Fisher	bfisher@calacademy.org						Mananara-Nord 225	ex rotten log|rainforest|1w|BOX-0620|http://www.antweb.org/specimen.do?name=CASENT0066832-D01	B.L.Fisher et al.	15-Nov-2005	Madagascar	Toamasina		Mananara-Nord 225	Parc National Mananara-Nord, 7.1 km 261° Antanambe	-16.455	49.788		225
ASAMF796-06	CASENT0066833-D01	Arthropoda	Insecta	Hymenoptera	Formicidae		Anochetus	Anochetus grandidieri	Brian Fisher	bfisher@calacademy.org						Mananara-Nord 225	ex rotten log|rainforest|1w|BOX-0620|http://www.antweb.org/specimen.do?name=CASENT0066833-D01	B.L.Fisher et al.	15-Nov-2005	Madagascar	Toamasina		Mananara-Nord 225	Parc National Mananara-Nord, 7.1 km 261° Antanambe	-16.455	49.788		225
ASAMF798-06	CASENT0066835-D01	Arthropoda	Insecta	Hymenoptera	Formicidae		Odontomachus	Odontomachus coquereli	Brian Fisher	bfisher@calacademy.org						Kalalao 100	ex rotten log|rainforest|1w|BOX-0620|http://www.antweb.org/specimen.do?name=CASENT0066835-D01	B.L.Fisher et al.	24-Nov-2005	Madagascar	Toamasina		Kalalao 100	Ile Sainte Marie, Foret Kalalao, 9.9 km 34° Ambodifotatra	-16.922	49.887		100
ASAMF799-06	CASENT0066835-D02	Arthropoda	Insecta	Hymenoptera	Formicidae		Odontomachus	Odontomachus coquereli	Brian Fisher	bfisher@calacademy.org						Kalalao 100	ex rotten log|rainforest|1l|BOX-0620|http://www.antweb.org/specimen.do?name=CASENT0066835-D02	B.L.Fisher et al.	24-Nov-2005	Madagascar	Toamasina		Kalalao 100	Ile Sainte Marie, Foret Kalalao, 9.9 km 34° Ambodifotatra	-16.922	49.887		100
ASAMF800-06	CASENT0066836-D01	Arthropoda	Insecta	Hymenoptera	Formicidae		Odontomachus	Odontomachus troglodytes	Brian Fisher	bfisher@calacademy.org						Kalalao 100	ex rotten log|rainforest|1w|BOX-0620|http://www.antweb.org/specimen.do?name=CASENT0066836-D01	B.L.Fisher et al.	24-Nov-2005	Madagascar	Toamasina		Kalalao 100	Ile Sainte Marie, Foret Kalalao, 9.9 km 34° Ambodifotatra	-16.922	49.887		100
ASAMF801-06	CASENT0066837-D01	Arthropoda	Insecta	Hymenoptera	Formicidae		Odontomachus	Odontomachus troglodytes	Brian Fisher	bfisher@calacademy.org						Kalalao 100	ex rotten log|rainforest|1w|BOX-0620|http://www.antweb.org/specimen.do?name=CASENT0066837-D01	B.L.Fisher et al.	26-Nov-2005	Madagascar	Toamasina		Kalalao 100	Ile Sainte Marie, Foret Kalalao, 9.9 km 34° Ambodifotatra	-16.922	49.887		100
ASAMF802-06	CASENT0066838-D01	Arthropoda	Insecta	Hymenoptera	Formicidae		Odontomachus	Odontomachus coquereli	Brian Fisher	bfisher@calacademy.org						Kalalao 100	ex rotten log|rainforest|1w|BOX-0620|http://www.antweb.org/specimen.do?name=CASENT0066838-D01	B.L.Fisher et al.	26-Nov-2005	Madagascar	Toamasina		Kalalao 100	Ile Sainte Marie, Foret Kalalao, 9.9 km 34° Ambodifotatra	-16.922	49.887		100
ASAMF803-06	CASENT0066839-D01	Arthropoda	Insecta	Hymenoptera	Formicidae		Odontomachus	Odontomachus troglodytes	Brian Fisher	bfisher@calacademy.org						Kalalao 100	under rotten log|rainforest|1w|BOX-0620|http://www.antweb.org/specimen.do?name=CASENT0066839-D01	B.L.Fisher et al.	26-Nov-2005	Madagascar	Toamasina		Kalalao 100	Ile Sainte Marie, Foret Kalalao, 9.9 km 34° Ambodifotatra	-16.922	49.887		100
ASAMF804-06	CASENT0066839-D02	Arthropoda	Insecta	Hymenoptera	Formicidae		Odontomachus	Odontomachus troglodytes	Brian Fisher	bfisher@calacademy.org						Kalalao 100	under rotten log|rainforest|1l|BOX-0620|http://www.antweb.org/specimen.do?name=CASENT0066839-D02	B.L.Fisher et al.	26-Nov-2005	Madagascar	Toamasina		Kalalao 100	Ile Sainte Marie, Foret Kalalao, 9.9 km 34° Ambodifotatra	-16.922	49.887		100
ASAMF807-06	CASENT0066852-D01	Arthropoda	Insecta	Hymenoptera	Formicidae		Anochetus	Anochetus grandidieri	Brian Fisher	bfisher@calacademy.org						Betampona 390	ex rotten log|rainforest|1w|BOX-0620|http://www.antweb.org/specimen.do?name=CASENT0066852-D01	B.L.Fisher et al.	29-Nov-2005	Madagascar	Toamasina		Betampona 390	Reserve Betampona, Camp Rendrirendry 34.1 km 332° Toamasina	-17.924	49.2		390
ASAMF808-06	CASENT0066852-D02	Arthropoda	Insecta	Hymenoptera	Formicidae		Anochetus	Anochetus grandidieri	Brian Fisher	bfisher@calacademy.org						Betampona 390	ex rotten log|rainforest|1l|BOX-0620|http://www.antweb.org/specimen.do?name=CASENT0066852-D02	B.L.Fisher et al.	29-Nov-2005	Madagascar	Toamasina		Betampona 390	Reserve Betampona, Camp Rendrirendry 34.1 km 332° Toamasina	-17.924	49.2		390
ASAMF809-06	CASENT0066853-D01	Arthropoda	Insecta	Hymenoptera	Formicidae		Odontomachus	Odontomachus coquereli	Brian Fisher	bfisher@calacademy.org						Betampona 390	ex rotten log|rainforest|1w|BOX-0620|http://www.antweb.org/specimen.do?name=CASENT0066853-D01	B.L.Fisher et al.	30-Nov-2005	Madagascar	Toamasina		Betampona 390	Reserve Betampona, Camp Rendrirendry 34.1 km 332° Toamasina	-17.924	49.2		390
ASAMF810-06	CASENT0066853-D02	Arthropoda	Insecta	Hymenoptera	Formicidae		Odontomachus	Odontomachus coquereli	Brian Fisher	bfisher@calacademy.org						Betampona 390	ex rotten log|rainforest|1l|BOX-0620|http://www.antweb.org/specimen.do?name=CASENT0066853-D02	B.L.Fisher et al.	30-Nov-2005	Madagascar	Toamasina		Betampona 390	Reserve Betampona, Camp Rendrirendry 34.1 km 332° Toamasina	-17.924	49.2		390
ASAMF811-06	CASENT0066854-D01	Arthropoda	Insecta	Hymenoptera	Formicidae		Odontomachus	Odontomachus coquereli	Brian Fisher	bfisher@calacademy.org						Betampona 520	under stone|rainforest|1w|BOX-0620|http://www.antweb.org/specimen.do?name=CASENT0066854-D01	B.L.Fisher et al.	03-Dec-2005	Madagascar	Toamasina		Betampona 520	Reserve Betampona, Camp Vohitsivalana, 37.1 km 338° Toamasina	-17.887	49.202		520
ASAMF812-06	CASENT0066855-D01	Arthropoda	Insecta	Hymenoptera	Formicidae		Odontomachus	Odontomachus coquereli	Brian Fisher	bfisher@calacademy.org						Betampona 520	ex rotten log|rainforest|1w|BOX-0620|http://www.antweb.org/specimen.do?name=CASENT0066855-D01	B.L.Fisher et al.	03-Dec-2005	Madagascar	Toamasina		Betampona 520	Reserve Betampona, Camp Vohitsivalana, 37.1 km 338° Toamasina	-17.887	49.202		520
ASAMF813-06	CASENT0066855-D02	Arthropoda	Insecta	Hymenoptera	Formicidae		Odontomachus	Odontomachus coquereli	Brian Fisher	bfisher@calacademy.org						Betampona 520	ex rotten log|rainforest|1l|BOX-0620|http://www.antweb.org/specimen.do?name=CASENT0066855-D02	B.L.Fisher et al.	03-Dec-2005	Madagascar	Toamasina		Betampona 520	Reserve Betampona, Camp Vohitsivalana, 37.1 km 338° Toamasina	-17.887	49.202		520
ASAMF814-06	CASENT0066856-D01	Arthropoda	Insecta	Hymenoptera	Formicidae		Odontomachus	Odontomachus coquereli	Brian Fisher	bfisher@calacademy.org						Betampona 520	ex rotten log|rainforest|1w|BOX-0620|http://www.antweb.org/specimen.do?name=CASENT0066856-D01	B.L.Fisher et al.	03-Dec-2005	Madagascar	Toamasina		Betampona 520	Reserve Betampona, Camp Vohitsivalana, 37.1 km 338° Toamasina	-17.887	49.202		520
ASAMF815-06	CASENT0066856-D02	Arthropoda	Insecta	Hymenoptera	Formicidae		Odontomachus	Odontomachus coquereli	Brian Fisher	bfisher@calacademy.org						Betampona 520	ex rotten log|rainforest|1l|BOX-0620|http://www.antweb.org/specimen.do?name=CASENT0066856-D02	B.L.Fisher et al.	03-Dec-2005	Madagascar	Toamasina		Betampona 520	Reserve Betampona, Camp Vohitsivalana, 37.1 km 338° Toamasina	-17.887	49.202		520
ASAMF816-06	CASENT0066857-D01	Arthropoda	Insecta	Hymenoptera	Formicidae		Odontomachus	Odontomachus coquereli	Brian Fisher	bfisher@calacademy.org						Betampona 520	ex rotten log|rainforest|1w|BOX-0620|http://www.antweb.org/specimen.do?name=CASENT0066857-D01	B.L.Fisher et al.	03-Dec-2005	Madagascar	Toamasina		Betampona 520	Reserve Betampona, Camp Vohitsivalana, 37.1 km 338° Toamasina	-17.887	49.202		520
ASAMF817-06	CASENT0066857-D02	Arthropoda	Insecta	Hymenoptera	Formicidae		Odontomachus	Odontomachus coquereli	Brian Fisher	bfisher@calacademy.org						Betampona 520	ex rotten log|rainforest|1l|BOX-0620|http://www.antweb.org/specimen.do?name=CASENT0066857-D02	B.L.Fisher et al.	03-Dec-2005	Madagascar	Toamasina		Betampona 520	Reserve Betampona, Camp Vohitsivalana, 37.1 km 338° Toamasina	-17.887	49.202		520
ASAMF818-06	CASENT0066858-D01	Arthropoda	Insecta	Hymenoptera	Formicidae		Odontomachus	Odontomachus coquereli	Brian Fisher	bfisher@calacademy.org						Betampona 520	under stone|rainforest|1w|BOX-0620|http://www.antweb.org/specimen.do?name=CASENT0066858-D01	B.L.Fisher et al.	03-Dec-2005	Madagascar	Toamasina		Betampona 520	Reserve Betampona, Camp Vohitsivalana, 37.1 km 338° Toamasina	-17.887	49.202		520
ASAMF819-06	CASENT0066859-D01	Arthropoda	Insecta	Hymenoptera	Formicidae		Odontomachus	Odontomachus coquereli	Brian Fisher	bfisher@calacademy.org						Betampona 520	ex rotten log|rainforest|1w|BOX-0620|http://www.antweb.org/specimen.do?name=CASENT0066859-D01	B.L.Fisher et al.	01-Dec-2005	Madagascar	Toamasina		Betampona 520	Reserve Betampona, Camp Vohitsivalana, 37.1 km 338° Toamasina	-17.887	49.202		520
ASAMF820-06	CASENT0066859-D02	Arthropoda	Insecta	Hymenoptera	Formicidae		Odontomachus	Odontomachus coquereli	Brian Fisher	bfisher@calacademy.org						Betampona 520	ex rotten log|rainforest|1l|BOX-0620|http://www.antweb.org/specimen.do?name=CASENT0066859-D02	B.L.Fisher et al.	01-Dec-2005	Madagascar	Toamasina		Betampona 520	Reserve Betampona, Camp Vohitsivalana, 37.1 km 338° Toamasina	-17.887	49.202		520
ASAMV234-06	CASENT0066938-D01	Arthropoda	Insecta	Hymenoptera	Formicidae		Odontomachus	Odontomachus coquereli	Brian Fisher	bfisher@calacademy.org						Marojejy 775	ex rotten log|rainforest|right hind leg of worker|BOX-0624|http://www.antweb.org/specimen.do?name=CASENT0066938-D01	B.L.Fisher et al.	13-Dec-2005	Madagascar	Antsiranana, Faritany d'		Marojejy 775	Parc National de Marojejy, Manantenina River, 27.6 km 35° NE Andapa, 9.6 km 327° NNW Manantenina	-14.435	49.76		775
ASAMF821-06	CASENT0067007-D01	Arthropoda	Insecta	Hymenoptera	Formicidae		Odontomachus	Odontomachus troglodytes	Brian Fisher	bfisher@calacademy.org						Ampanihy 10	ex rotten log|littoral rainforest|1w|BOX-0620|http://www.antweb.org/specimen.do?name=CASENT0067007-D01	B.L.Fisher et al.	25-Nov-2005	Madagascar	Toamasina		Ampanihy 10	Ile Sainte Marie, Foret Ampanihy, 14.4 km 52° Ambodifotatra	-16.911	49.939		10
ASAMF822-06	CASENT0067009-D01	Arthropoda	Insecta	Hymenoptera	Formicidae		Odontomachus	Odontomachus troglodytes	Brian Fisher	bfisher@calacademy.org						Mahavelona 30	under rotten log|eucalyptus plantation|1w|BOX-0620|http://www.antweb.org/specimen.do?name=CASENT0067009-D01	B.L.Fisher et al.	27-Nov-2005	Madagascar	Toamasina		Mahavelona 30	2.1 km 315° Mahavelona	-17.67	49.496		30
ASAMF823-06	CASENT0067009-D02	Arthropoda	Insecta	Hymenoptera	Formicidae		Odontomachus	Odontomachus troglodytes	Brian Fisher	bfisher@calacademy.org						Mahavelona 30	under rotten log|eucalyptus plantation|1l|BOX-0620|http://www.antweb.org/specimen.do?name=CASENT0067009-D02	B.L.Fisher et al.	27-Nov-2005	Madagascar	Toamasina		Mahavelona 30	2.1 km 315° Mahavelona	-17.67	49.496		30
ASAMF824-06	CASENT0067010-D01	Arthropoda	Insecta	Hymenoptera	Formicidae		Odontomachus	Odontomachus troglodytes	Brian Fisher	bfisher@calacademy.org						Mahavelona 30	ex rotten log|eucalyptus plantation|1w|BOX-0620|http://www.antweb.org/specimen.do?name=CASENT0067010-D01	B.L.Fisher et al.	27-Nov-2005	Madagascar	Toamasina		Mahavelona 30	2.1 km 315° Mahavelona	-17.67	49.496		30
ASAMF825-06	CASENT0067011-D01	Arthropoda	Insecta	Hymenoptera	Formicidae		Anochetus	Anochetus madagascarensis	Brian Fisher	bfisher@calacademy.org						Analalava 50	ground forager(s)|littoral rainforest|1w|BOX-0620|http://www.antweb.org/specimen.do?name=CASENT0067011-D01	B.L.Fisher et al.	27-Nov-2005	Madagascar	Toamasina		Analalava 50	Analalava, 7.0 km 255° Mahavelona	-17.71	49.454		50
ASAMF826-06	CASENT0067012-D01	Arthropoda	Insecta	Hymenoptera	Formicidae		Anochetus	Anochetus madagascarensis	Brian Fisher	bfisher@calacademy.org						Analalava 50	ex rotten log|littoral rainforest|1w|BOX-0620|http://www.antweb.org/specimen.do?name=CASENT0067012-D01	B.L.Fisher et al.	27-Nov-2005	Madagascar	Toamasina		Analalava 50	Analalava, 7.0 km 255° Mahavelona	-17.71	49.454		50
ASAMF827-06	CASENT0067013-D01	Arthropoda	Insecta	Hymenoptera	Formicidae		Anochetus	Anochetus madagascarensis	Brian Fisher	bfisher@calacademy.org						Analalava 50	ex rotten log|littoral rainforest|1w|BOX-0620|http://www.antweb.org/specimen.do?name=CASENT0067013-D01	B.L.Fisher et al.	27-Nov-2005	Madagascar	Toamasina		Analalava 50	Analalava, 7.0 km 255° Mahavelona	-17.71	49.454		50
ASAMV245-06	CASENT0067298-D01	Arthropoda	Insecta	Hymenoptera	Formicidae		Anochetus	Anochetus grandidieri	Brian Fisher	bfisher@calacademy.org						Mandrisy	ex rotten log|littoral rainforest|1w|BOX-0624|http://www.antweb.org/specimen.do?name=CASENT0067298-D01	B.L.Fisher et al.	13-Nov-2005	Madagascar	Toamasina		Mandrisy	Foret d'Analava Mandrisy, 5.9 km 195ºAntanambe	-16.486	49.847		10
ASAMV280-06	CASENT0067669-D01	Arthropoda	Insecta	Hymenoptera	Formicidae		Anochetus	Anochetus grandidieri	Brian Fisher	bfisher@calacademy.org						Betampona 520	ex rotten log|rainforest|1w|BOX-0624|http://www.antweb.org/specimen.do?name=CASENT0067669-D01	B.L.Fisher et al.	02-Dec-2005	Madagascar	Toamasina		Betampona 520	Reserve Betampona, Camp Vohitsivalana, 37.1 km 338° Toamasina	-17.887	49.202		520
ASAMV298-06	CASENT0068008-D01	Arthropoda	Insecta	Hymenoptera	Formicidae		Anochetus	Anochetus grandidieri	Brian Fisher	bfisher@calacademy.org						Ambodiriana 125	ex rotten log|rainforest|1w|BOX-0624|http://www.antweb.org/specimen.do?name=CASENT0068008-D01	B.L.Fisher et al.	18-Nov-2005	Madagascar	Toamasina		Ambodiriana 125	Res. Ambodiriana, 4.8 km 306°Manompana, along Manompana river	-16.672	49.701		125
ASAMY132-07	CASENT0068065-D01	Arthropoda	Insecta	Hymenoptera	Formicidae		Anochetus	Anochetus grandidieri	Brian Fisher	bfisher@calacademy.org						Ambodiriana 125	sifted litter|rainforest|1w|BOX-1942|http://www.antweb.org/specimen.do?name=CASENT0068065-D01	B.L.Fisher et al.	18-Nov-2005	Madagascar	Toamasina		Ambodiriana 125	Res. Ambodiriana, 4.8 km 306°Manompana, along Manompana river	-16.672	49.701		125
ASAMY133-07	CASENT0068066-D01	Arthropoda	Insecta	Hymenoptera	Formicidae		Anochetus	Anochetus grandidieri	Brian Fisher	bfisher@calacademy.org						Ambodiriana 125	sifted litter|rainforest|1w|BOX-1942|http://www.antweb.org/specimen.do?name=CASENT0068066-D01	B.L.Fisher et al.	18-Nov-2005	Madagascar	Toamasina		Ambodiriana 125	Res. Ambodiriana, 4.8 km 306°Manompana, along Manompana river	-16.672	49.701		125
ASAMY134-07	CASENT0068067-D01	Arthropoda	Insecta	Hymenoptera	Formicidae		Anochetus	Anochetus grandidieri	Brian Fisher	bfisher@calacademy.org						Ambodiriana 125	sifted litter|rainforest|1w|BOX-1942|http://www.antweb.org/specimen.do?name=CASENT0068067-D01	B.L.Fisher et al.	18-Nov-2005	Madagascar	Toamasina		Ambodiriana 125	Res. Ambodiriana, 4.8 km 306°Manompana, along Manompana river	-16.672	49.701		125
ASAMY135-07	CASENT0068068-D01	Arthropoda	Insecta	Hymenoptera	Formicidae		Anochetus	Anochetus grandidieri	Brian Fisher	bfisher@calacademy.org						Ambodiriana 125	sifted litter|rainforest|1w|BOX-1942|http://www.antweb.org/specimen.do?name=CASENT0068068-D01	B.L.Fisher et al.	18-Nov-2005	Madagascar	Toamasina		Ambodiriana 125	Res. Ambodiriana, 4.8 km 306°Manompana, along Manompana river	-16.672	49.701		125
ASAMY136-07	CASENT0068069-D01	Arthropoda	Insecta	Hymenoptera	Formicidae		Anochetus	Anochetus grandidieri	Brian Fisher	bfisher@calacademy.org						Ambodiriana 125	sifted litter|rainforest|1w|BOX-1942|http://www.antweb.org/specimen.do?name=CASENT0068069-D01	B.L.Fisher et al.	18-Nov-2005	Madagascar	Toamasina		Ambodiriana 125	Res. Ambodiriana, 4.8 km 306°Manompana, along Manompana river	-16.672	49.701		125
ASAMY137-07	CASENT0068070-D01	Arthropoda	Insecta	Hymenoptera	Formicidae		Anochetus	Anochetus grandidieri	Brian Fisher	bfisher@calacademy.org						Ambodiriana 125	sifted litter|rainforest|1w|BOX-1942|http://www.antweb.org/specimen.do?name=CASENT0068070-D01	B.L.Fisher et al.	18-Nov-2005	Madagascar	Toamasina		Ambodiriana 125	Res. Ambodiriana, 4.8 km 306°Manompana, along Manompana river	-16.672	49.701		125
ASAMY139-07	CASENT0068072-D01	Arthropoda	Insecta	Hymenoptera	Formicidae		Anochetus	Anochetus grandidieri	Brian Fisher	bfisher@calacademy.org						Ambodiriana 125	sifted litter|rainforest|1w|BOX-1943|http://www.antweb.org/specimen.do?name=CASENT0068072-D01	B.L.Fisher et al.	18-Nov-2005	Madagascar	Toamasina		Ambodiriana 125	Res. Ambodiriana, 4.8 km 306°Manompana, along Manompana river	-16.672	49.701		125
ASAMY140-07	CASENT0068073-D01	Arthropoda	Insecta	Hymenoptera	Formicidae		Anochetus	Anochetus grandidieri	Brian Fisher	bfisher@calacademy.org						Ambodiriana 125	sifted litter|rainforest|1w|BOX-1943|http://www.antweb.org/specimen.do?name=CASENT0068073-D01	B.L.Fisher et al.	18-Nov-2005	Madagascar	Toamasina		Ambodiriana 125	Res. Ambodiriana, 4.8 km 306°Manompana, along Manompana river	-16.672	49.701		125
ASAMY141-07	CASENT0068074-D01	Arthropoda	Insecta	Hymenoptera	Formicidae		Anochetus	Anochetus grandidieri	Brian Fisher	bfisher@calacademy.org						Ambodiriana 125	sifted litter|rainforest|1w|BOX-1943|http://www.antweb.org/specimen.do?name=CASENT0068074-D01	B.L.Fisher et al.	18-Nov-2005	Madagascar	Toamasina		Ambodiriana 125	Res. Ambodiriana, 4.8 km 306°Manompana, along Manompana river	-16.672	49.701		125
ASAMY142-07	CASENT0068075-D01	Arthropoda	Insecta	Hymenoptera	Formicidae		Anochetus	Anochetus grandidieri	Brian Fisher	bfisher@calacademy.org						Ambodiriana 125	sifted litter|rainforest|1w|BOX-1943|http://www.antweb.org/specimen.do?name=CASENT0068075-D01	B.L.Fisher et al.	18-Nov-2005	Madagascar	Toamasina		Ambodiriana 125	Res. Ambodiriana, 4.8 km 306°Manompana, along Manompana river	-16.672	49.701		125
ASAMY143-07	CASENT0068076-D01	Arthropoda	Insecta	Hymenoptera	Formicidae		Anochetus	Anochetus grandidieri	Brian Fisher	bfisher@calacademy.org						Ambodiriana 125	sifted litter|rainforest|1w|BOX-1943|http://www.antweb.org/specimen.do?name=CASENT0068076-D01	B.L.Fisher et al.	18-Nov-2005	Madagascar	Toamasina		Ambodiriana 125	Res. Ambodiriana, 4.8 km 306°Manompana, along Manompana river	-16.672	49.701		125
ASAMY144-07	CASENT0068077-D01	Arthropoda	Insecta	Hymenoptera	Formicidae		Anochetus	Anochetus grandidieri	Brian Fisher	bfisher@calacademy.org						Ambodiriana 125	sifted litter|rainforest|1w|BOX-1943|http://www.antweb.org/specimen.do?name=CASENT0068077-D01	B.L.Fisher et al.	18-Nov-2005	Madagascar	Toamasina		Ambodiriana 125	Res. Ambodiriana, 4.8 km 306°Manompana, along Manompana river	-16.672	49.701		125
ASAMY145-07	CASENT0068078-D01	Arthropoda	Insecta	Hymenoptera	Formicidae		Anochetus	Anochetus grandidieri	Brian Fisher	bfisher@calacademy.org						Ambodiriana 125	sifted litter|rainforest|1w|BOX-1943|http://www.antweb.org/specimen.do?name=CASENT0068078-D01	B.L.Fisher et al.	18-Nov-2005	Madagascar	Toamasina		Ambodiriana 125	Res. Ambodiriana, 4.8 km 306°Manompana, along Manompana river	-16.672	49.701		125
ASAMY146-07	CASENT0068079-D01	Arthropoda	Insecta	Hymenoptera	Formicidae		Anochetus	Anochetus grandidieri	Brian Fisher	bfisher@calacademy.org						Ambodiriana 125	sifted litter|rainforest|1w|BOX-1943|http://www.antweb.org/specimen.do?name=CASENT0068079-D01	B.L.Fisher et al.	18-Nov-2005	Madagascar	Toamasina		Ambodiriana 125	Res. Ambodiriana, 4.8 km 306°Manompana, along Manompana river	-16.672	49.701		125
ASAMV299-06	CASENT0068187-D01	Arthropoda	Insecta	Hymenoptera	Formicidae		Anochetus	Anochetus grandidieri	Brian Fisher	bfisher@calacademy.org						Marojejy 775	ground nest|rainforest|1w|BOX-0624|http://www.antweb.org/specimen.do?name=CASENT0068187-D01	B.L.Fisher et al.	11-Dec-2005	Madagascar	Antsiranana, Faritany d'		Marojejy 775	Parc National de Marojejy, Manantenina River, 27.6 km 35° NE Andapa, 9.6 km 327° NNW Manantenina	-14.435	49.76		775
ASAMV335-06	CASENT0068352-D01	Arthropoda	Insecta	Hymenoptera	Formicidae		Anochetus	Anochetus pattersoni	Brian Fisher	bfisher@calacademy.org						Aldabra Picard Island	found after dark on concrete slab in abandoned settlement|mostly Casuarinia with coco palms, exotic vegetation|1w|BOX-0624|http://www.antweb.org/specimen.do?name=CASENT0068352-D01	S.M.Goodman	19-Dec-2005	Seychelles			Aldabra Picard Island	Aldabra Island Group, Picard Island, in old "Settlement"	-9.393	46.204		5
ASAMV336-06	CASENT0068356-D01	Arthropoda	Insecta	Hymenoptera	Formicidae		Anochetus	Anochetus grandidieri	Brian Fisher	bfisher@calacademy.org						Kalalao 100	sifted litter|rainforest|1w|BOX-0624|http://www.antweb.org/specimen.do?name=CASENT0068356-D01	B.L.Fisher et al.	24-Nov-2005	Madagascar	Toamasina		Kalalao 100	Ile Sainte Marie, Foret Kalalao, 9.9 km 34° Ambodifotatra	-16.922	49.887		100
ASAMV337-06	CASENT0068358-D01	Arthropoda	Insecta	Hymenoptera	Formicidae		Anochetus	Anochetus grandidieri	Brian Fisher	bfisher@calacademy.org						Kalalao 100	sifted litter|rainforest|1w|BOX-0624|http://www.antweb.org/specimen.do?name=CASENT0068358-D01	B.L.Fisher et al.	24-Nov-2005	Madagascar	Toamasina		Kalalao 100	Ile Sainte Marie, Foret Kalalao, 9.9 km 34° Ambodifotatra	-16.922	49.887		100
ASAMV339-06	CASENT0068472-D01	Arthropoda	Insecta	Hymenoptera	Formicidae		Anochetus	Anochetus grandidieri	Brian Fisher	bfisher@calacademy.org						Betampona 520	sifted litter|rainforest|1w|BOX-0624|http://www.antweb.org/specimen.do?name=CASENT0068472-D01	B.L.Fisher et al.	01-Dec-2005	Madagascar	Toamasina		Betampona 520	Reserve Betampona, Camp Vohitsivalana, 37.1 km 338° Toamasina	-17.887	49.202		520
ASAMV340-06	CASENT0068475-D01	Arthropoda	Insecta	Hymenoptera	Formicidae		Anochetus	Anochetus grandidieri	Brian Fisher	bfisher@calacademy.org						Betampona 520	sifted litter|rainforest|1w|BOX-0624|http://www.antweb.org/specimen.do?name=CASENT0068475-D01	B.L.Fisher et al.	01-Dec-2005	Madagascar	Toamasina		Betampona 520	Reserve Betampona, Camp Vohitsivalana, 37.1 km 338° Toamasina	-17.887	49.202		520
ASAMV341-06	CASENT0068476-D01	Arthropoda	Insecta	Hymenoptera	Formicidae		Anochetus	Anochetus grandidieri	Brian Fisher	bfisher@calacademy.org						Betampona 520	sifted litter|rainforest|1w|BOX-0624|http://www.antweb.org/specimen.do?name=CASENT0068476-D01	B.L.Fisher et al.	01-Dec-2005	Madagascar	Toamasina		Betampona 520	Reserve Betampona, Camp Vohitsivalana, 37.1 km 338° Toamasina	-17.887	49.202		520
ASAMV342-06	CASENT0068497-D01	Arthropoda	Insecta	Hymenoptera	Formicidae		Odontomachus	Odontomachus coquereli	Brian Fisher	bfisher@calacademy.org						Betampona 520	sifted litter|rainforest|right hind leg of worker|BOX-0624|http://www.antweb.org/specimen.do?name=CASENT0068497-D01	B.L.Fisher et al.	01-Dec-2005	Madagascar	Toamasina		Betampona 520	Reserve Betampona, Camp Vohitsivalana, 37.1 km 338° Toamasina	-17.887	49.202		520
ASAMV343-06	CASENT0068617-D01	Arthropoda	Insecta	Hymenoptera	Formicidae		Anochetus	Anochetus grandidieri	Brian Fisher	bfisher@calacademy.org						Mananara-Nord 225	sifted litter|rainforest|1w|BOX-0624|http://www.antweb.org/specimen.do?name=CASENT0068617-D01	B.L.Fisher et al.	14-Nov-2005	Madagascar	Toamasina		Mananara-Nord 225	Parc National Mananara-Nord, 7.1 km 261° Antanambe	-16.455	49.788		225
ASAMV344-06	CASENT0068622-D01	Arthropoda	Insecta	Hymenoptera	Formicidae		Anochetus	Anochetus grandidieri	Brian Fisher	bfisher@calacademy.org						Mananara-Nord 225	sifted litter|rainforest|1w|BOX-0624|http://www.antweb.org/specimen.do?name=CASENT0068622-D01	B.L.Fisher et al.	14-Nov-2005	Madagascar	Toamasina		Mananara-Nord 225	Parc National Mananara-Nord, 7.1 km 261° Antanambe	-16.455	49.788		225
ASAMV345-06	CASENT0068628-D01	Arthropoda	Insecta	Hymenoptera	Formicidae		Anochetus	Anochetus grandidieri	Brian Fisher	bfisher@calacademy.org						Mananara-Nord 225	sifted litter|rainforest|1w|BOX-0624|http://www.antweb.org/specimen.do?name=CASENT0068628-D01	B.L.Fisher et al.	14-Nov-2005	Madagascar	Toamasina		Mananara-Nord 225	Parc National Mananara-Nord, 7.1 km 261° Antanambe	-16.455	49.788		225
ASAMV346-06	CASENT0068936-D01	Arthropoda	Insecta	Hymenoptera	Formicidae		Anochetus	Anochetus grandidieri	Brian Fisher	bfisher@calacademy.org						Ambohidena 20	sifted litter|littoral rainforest|1w|BOX-0624|http://www.antweb.org/specimen.do?name=CASENT0068936-D01	B.L.Fisher et al.	21-Nov-2005	Madagascar	Toamasina		Ambohidena 20	Ile Sainte Marie, Foret Ambohidena, 22.8 km 44° Ambodifotatra	-16.824	49.964		20
ASAMV347-06	CASENT0069026-D01	Arthropoda	Insecta	Hymenoptera	Formicidae		Odontomachus	Odontomachus troglodytes	Brian Fisher	bfisher@calacademy.org						Ambohidena 20	sifted litter|littoral rainforest|right hind leg of worker|BOX-0624|http://www.antweb.org/specimen.do?name=CASENT0069026-D01	B.L.Fisher et al.	21-Nov-2005	Madagascar	Toamasina		Ambohidena 20	Ile Sainte Marie, Foret Ambohidena, 22.8 km 44° Ambodifotatra	-16.824	49.964		20
ASAMV363-06	CASENT0069747-D01	Arthropoda	Insecta	Hymenoptera	Formicidae		Odontomachus	Odontomachus troglodytes	Brian Fisher	bfisher@calacademy.org						Kalalao 100	sifted litter|rainforest|1w|BOX-0624|http://www.antweb.org/specimen.do?name=CASENT0069747-D01	B.L.Fisher et al.	24-Nov-2005	Madagascar	Toamasina		Kalalao 100	Ile Sainte Marie, Foret Kalalao, 9.9 km 34° Ambodifotatra	-16.922	49.887		100
ASAMV364-06	CASENT0069941-D01	Arthropoda	Insecta	Hymenoptera	Formicidae		Odontomachus	Odontomachus coquereli	Brian Fisher	bfisher@calacademy.org						Mananara-Nord 225	sifted litter|rainforest|right hind leg of worker|BOX-0624|http://www.antweb.org/specimen.do?name=CASENT0069941-D01	B.L.Fisher et al.	14-Nov-2005	Madagascar	Toamasina		Mananara-Nord 225	Parc National Mananara-Nord, 7.1 km 261° Antanambe	-16.455	49.788		225
ASAMY196-07	CASENT0070143-D01	Arthropoda	Insecta	Hymenoptera	Formicidae		Anochetus	Anochetus grandidieri	Brian Fisher	bfisher@calacademy.org						Betampona 390	sifted litter|rainforest|1w|BOX-1943|http://www.antweb.org/specimen.do?name=CASENT0070143-D01	B.L.Fisher et al.	28-Nov-2005	Madagascar	Toamasina		Betampona 390	Reserve Betampona, Camp Rendrirendry 34.1 km 332° Toamasina	-17.924	49.2		390
ASAMY197-07	CASENT0070144-D01	Arthropoda	Insecta	Hymenoptera	Formicidae		Anochetus	Anochetus grandidieri	Brian Fisher	bfisher@calacademy.org						Betampona 390	sifted litter|rainforest|1w|BOX-1943|http://www.antweb.org/specimen.do?name=CASENT0070144-D01	B.L.Fisher et al.	28-Nov-2005	Madagascar	Toamasina		Betampona 390	Reserve Betampona, Camp Rendrirendry 34.1 km 332° Toamasina	-17.924	49.2		390
ASAMY200-07	CASENT0070411-D01	Arthropoda	Insecta	Hymenoptera	Formicidae		Anochetus	Anochetus grandidieri	Brian Fisher	bfisher@calacademy.org						Mandrisy	sifted litter|littoral rainforest|1w|BOX-1942|http://www.antweb.org/specimen.do?name=CASENT0070411-D01	B.L.Fisher et al.	12-Nov-2005	Madagascar	Toamasina		Mandrisy	Foret d'Analava Mandrisy, 5.9 km 195ºAntanambe	-16.486	49.847		10
ASAMY218-07	CASENT0070496-D01	Arthropoda	Insecta	Hymenoptera	Formicidae		Anochetus	Anochetus grandidieri	Brian Fisher	bfisher@calacademy.org						Mandrisy	sifted litter|littoral rainforest|1w|BOX-1942|http://www.antweb.org/specimen.do?name=CASENT0070496-D01	B.L.Fisher et al.	12-Nov-2005	Madagascar	Toamasina		Mandrisy	Foret d'Analava Mandrisy, 5.9 km 195ºAntanambe	-16.486	49.847		10
ASAMY224-07	CASENT0070513-D01	Arthropoda	Insecta	Hymenoptera	Formicidae		Anochetus	Anochetus grandidieri	Brian Fisher	bfisher@calacademy.org						Mandrisy	sifted litter|littoral rainforest|1w|BOX-1942|http://www.antweb.org/specimen.do?name=CASENT0070513-D01	B.L.Fisher et al.	12-Nov-2005	Madagascar	Toamasina		Mandrisy	Foret d'Analava Mandrisy, 5.9 km 195ºAntanambe	-16.486	49.847		10
ASAMX676-06	CASENT0070618-D01	Arthropoda	Insecta	Hymenoptera	Formicidae		Anochetus	Anochetus grandidieri	Brian Fisher	bfisher@calacademy.org						Vevembe 600	ex rotten log|rainforest, transition to montane forest|1w|BOX-1229|http://www.antweb.org/specimen.do?name=CASENT0070618-D01	B.L.Fisher et al.	24-Apr-2006	Madagascar	Fianarantsoa		Vevembe 600	Foret de Vevembe, 66.6 km 293° Farafangana	-22.791	47.182		600
ASAMX683-06	CASENT0070656-D01	Arthropoda	Insecta	Hymenoptera	Formicidae		Anochetus	Anochetus grandidieri	Brian Fisher	bfisher@calacademy.org						Vevembe 600	ex rotten log|rainforest, transition to montane forest|1w|BOX-1229|http://www.antweb.org/specimen.do?name=CASENT0070656-D01	B.L.Fisher et al.	24-Apr-2006	Madagascar	Fianarantsoa		Vevembe 600	Foret de Vevembe, 66.6 km 293° Farafangana	-22.791	47.182		600
ASAMX684-06	CASENT0070670-D01	Arthropoda	Insecta	Hymenoptera	Formicidae		Anochetus	Anochetus grandidieri	Brian Fisher	bfisher@calacademy.org						Vevembe 600	ex rotten log|rainforest, transition to montane forest|1w|BOX-1229|http://www.antweb.org/specimen.do?name=CASENT0070670-D01	B.L.Fisher et al.	24-Apr-2006	Madagascar	Fianarantsoa		Vevembe 600	Foret de Vevembe, 66.6 km 293° Farafangana	-22.791	47.182		600
ASAMX687-06	CASENT0070699-D01	Arthropoda	Insecta	Hymenoptera	Formicidae		Anochetus	Anochetus grandidieri	Brian Fisher	bfisher@calacademy.org						Vevembe 600	ex rotten log|rainforest, transition to montane forest|1w|BOX-1229|http://www.antweb.org/specimen.do?name=CASENT0070699-D01	B.L. Fisher et al.	23-Apr-2006	Madagascar	Fianarantsoa		Vevembe 600	Foret de Vevembe, 66.6 km 293° Farafangana	-22.791	47.182		600
ASAMX688-06	CASENT0070707-D01	Arthropoda	Insecta	Hymenoptera	Formicidae		Anochetus	Anochetus grandidieri	Brian Fisher	bfisher@calacademy.org						Vevembe 600	ex rotten log|rainforest, transition to montane forest|1w|BOX-1229|http://www.antweb.org/specimen.do?name=CASENT0070707-D01	B.L. Fisher et al.	24-Apr-2006	Madagascar	Fianarantsoa		Vevembe 600	Foret de Vevembe, 66.6 km 293° Farafangana	-22.791	47.182		600
ASAMX689-06	CASENT0070717-D01	Arthropoda	Insecta	Hymenoptera	Formicidae		Anochetus	Anochetus grandidieri	Brian Fisher	bfisher@calacademy.org						Vevembe 600	ex rotten log|rainforest, transition to montane forest|1w|BOX-1229|http://www.antweb.org/specimen.do?name=CASENT0070717-D01	B.L. Fisher et al.	23-Apr-2006	Madagascar	Fianarantsoa		Vevembe 600	Foret de Vevembe, 66.6 km 293° Farafangana	-22.791	47.182		600
ASAMX692-06	CASENT0070737-D01	Arthropoda	Insecta	Hymenoptera	Formicidae		Anochetus	Anochetus grandidieri	Brian Fisher	bfisher@calacademy.org						Vevembe 600	ex rotten log|rainforest, transition to montane forest|1w|BOX-1229|http://www.antweb.org/specimen.do?name=CASENT0070737-D01	B.L. Fisher et al.	23-Apr-2006	Madagascar	Fianarantsoa		Vevembe 600	Foret de Vevembe, 66.6 km 293° Farafangana	-22.791	47.182		600
ASAMX693-06	CASENT0070766-D01	Arthropoda	Insecta	Hymenoptera	Formicidae		Anochetus	Anochetus grandidieri	Brian Fisher	bfisher@calacademy.org						Vevembe 600	ex rotten log|rainforest, transition to montane forest|1w|BOX-1229|http://www.antweb.org/specimen.do?name=CASENT0070766-D01	B.L.Fisher et al.	24-Apr-2006	Madagascar	Fianarantsoa		Vevembe 600	Foret de Vevembe, 66.6 km 293° Farafangana	-22.791	47.182		600
ASAMX694-06	CASENT0070830-D01	Arthropoda	Insecta	Hymenoptera	Formicidae		Anochetus	Anochetus grandidieri	Brian Fisher	bfisher@calacademy.org						Vevembe 600	ex rotten log|rainforest, transition to montane forest|1w|BOX-1229|http://www.antweb.org/specimen.do?name=CASENT0070830-D01	B.L. Fisher et al.	23-Apr-2006	Madagascar	Fianarantsoa		Vevembe 600	Foret de Vevembe, 66.6 km 293° Farafangana	-22.791	47.182		600
ASAMX700-06	CASENT0070912-D01	Arthropoda	Insecta	Hymenoptera	Formicidae		Anochetus	Anochetus madagascarensis	Brian Fisher	bfisher@calacademy.org						Mahabo 20	ex rotten log|littoral rainforest|1w|BOX-1229|http://www.antweb.org/specimen.do?name=CASENT0070912-D01	B.L. Fisher et al.	19-Apr-2006	Madagascar	Fianarantsoa		Mahabo 20	Reserve Forestiere d'Agnalazaha, Mahabo, 42.9 km 215° Farafangana	-23.194	47.723		20
ASAMX705-06	CASENT0070928-D01	Arthropoda	Insecta	Hymenoptera	Formicidae		Anochetus	Anochetus grandidieri	Brian Fisher	bfisher@calacademy.org						Mahabo 20	under moss on rotten log|littoral rainforest|1w|BOX-1229|http://www.antweb.org/specimen.do?name=CASENT0070928-D01	B.L. Fisher et al.	19-Apr-2006	Madagascar	Fianarantsoa		Mahabo 20	Reserve Forestiere d'Agnalazaha, Mahabo, 42.9 km 215° Farafangana	-23.194	47.723		20
ASAMX708-06	CASENT0070946-D01	Arthropoda	Insecta	Hymenoptera	Formicidae		Anochetus	Anochetus madagascarensis	Brian Fisher	bfisher@calacademy.org						Mahabo 20	ex rotten log|littoral rainforest|1w|BOX-1229|http://www.antweb.org/specimen.do?name=CASENT0070946-D01	B.L. Fisher et al.	19-Apr-2006	Madagascar	Fianarantsoa		Mahabo 20	Reserve Forestiere d'Agnalazaha, Mahabo, 42.9 km 215° Farafangana	-23.194	47.723		20
ASAMX711-06	CASENT0070968-D01	Arthropoda	Insecta	Hymenoptera	Formicidae		Anochetus	Anochetus grandidieri	Brian Fisher	bfisher@calacademy.org						Mahabo 20	ex rotten log|littoral rainforest|1w|BOX-1229|http://www.antweb.org/specimen.do?name=CASENT0070968-D01	B.L. Fisher et al.	19-Apr-2006	Madagascar	Fianarantsoa		Mahabo 20	Reserve Forestiere d'Agnalazaha, Mahabo, 42.9 km 215° Farafangana	-23.194	47.723		20
ASAMX712-06	CASENT0070971-D01	Arthropoda	Insecta	Hymenoptera	Formicidae		Anochetus	Anochetus grandidieri	Brian Fisher	bfisher@calacademy.org						Mahabo 20	ex rotten log|littoral rainforest|1w|BOX-1229|http://www.antweb.org/specimen.do?name=CASENT0070971-D01	B.L. Fisher et al.	19-Apr-2006	Madagascar	Fianarantsoa		Mahabo 20	Reserve Forestiere d'Agnalazaha, Mahabo, 42.9 km 215° Farafangana	-23.194	47.723		20
ASAMX716-06	CASENT0070988-D01	Arthropoda	Insecta	Hymenoptera	Formicidae		Anochetus	Anochetus madagascarensis	Brian Fisher	bfisher@calacademy.org						Mahabo 20	under moss, on ground|littoral rainforest|1w|BOX-1229|http://www.antweb.org/specimen.do?name=CASENT0070988-D01	B.L. Fisher et al.	20-Apr-2006	Madagascar	Fianarantsoa		Mahabo 20	Reserve Forestiere d'Agnalazaha, Mahabo, 42.9 km 215° Farafangana	-23.194	47.723		20
ASAMX717-06	CASENT0071129-D01	Arthropoda	Insecta	Hymenoptera	Formicidae		Anochetus	Anochetus grandidieri	Brian Fisher	bfisher@calacademy.org						Vevembe 600	ex rotten log|rainforest, transition to montane forest|1w|BOX-1229|http://www.antweb.org/specimen.do?name=CASENT0071129-D01	B.L. Fisher et al.	23-Apr-2006	Madagascar	Fianarantsoa		Vevembe 600	Foret de Vevembe, 66.6 km 293° Farafangana	-22.791	47.182		600
ASAMX719-06	CASENT0071130-D01	Arthropoda	Insecta	Hymenoptera	Formicidae		Anochetus	Anochetus grandidieri	Brian Fisher	bfisher@calacademy.org						Vevembe 600	ex rotten log|rainforest, transition to montane forest|1w|BOX-1229|http://www.antweb.org/specimen.do?name=CASENT0071130-D01	B.L. Fisher et al.	24-Apr-2006	Madagascar	Fianarantsoa		Vevembe 600	Foret de Vevembe, 66.6 km 293° Farafangana	-22.791	47.182		600
ASAMX722-06	CASENT0071135-D01	Arthropoda	Insecta	Hymenoptera	Formicidae		Anochetus	Anochetus grandidieri	Brian Fisher	bfisher@calacademy.org						Vevembe 600	ex rotten log|rainforest, transition to montane forest|1w|BOX-1229|http://www.antweb.org/specimen.do?name=CASENT0071135-D01	B.L.Fisher et al.	24-Apr-2006	Madagascar	Fianarantsoa		Vevembe 600	Foret de Vevembe, 66.6 km 293° Farafangana	-22.791	47.182		600
ASAMX729-06	CASENT0071172-D01	Arthropoda	Insecta	Hymenoptera	Formicidae		Anochetus	Anochetus madagascarensis	Brian Fisher	bfisher@calacademy.org						Farafangana	on low vegetation|urban gardens|1w|BOX-1229|http://www.antweb.org/specimen.do?name=CASENT0071172-D01	B.L.Fisher et al.	25-Apr-2006	Madagascar	Fianarantsoa		Farafangana	Farafangana	-22.82	47.83		10
ASAMX736-06	CASENT0071202-D01	Arthropoda	Insecta	Hymenoptera	Formicidae		Anochetus	Anochetus madagascarensis	Brian Fisher	bfisher@calacademy.org						Mahabo 20	ex rotten log|littoral rainforest|1w|BOX-1229|http://www.antweb.org/specimen.do?name=CASENT0071202-D01	B.L. Fisher et al.	19-Apr-2006	Madagascar	Fianarantsoa		Mahabo 20	Reserve Forestiere d'Agnalazaha, Mahabo, 42.9 km 215° Farafangana	-23.194	47.723		20
ASAMX737-06	CASENT0071202-D02	Arthropoda	Insecta	Hymenoptera	Formicidae		Anochetus	Anochetus madagascarensis	Brian Fisher	bfisher@calacademy.org						Mahabo 20	ex rotten log|littoral rainforest|1l|BOX-1229|http://www.antweb.org/specimen.do?name=CASENT0071202-D02	B.L. Fisher et al.	19-Apr-2006	Madagascar	Fianarantsoa		Mahabo 20	Reserve Forestiere d'Agnalazaha, Mahabo, 42.9 km 215° Farafangana	-23.194	47.723		20
ASAMX738-06	CASENT0071203-D01	Arthropoda	Insecta	Hymenoptera	Formicidae		Anochetus	Anochetus madagascarensis	Brian Fisher	bfisher@calacademy.org						Mahabo 20	ex rotten log|littoral rainforest|1w|BOX-1229|http://www.antweb.org/specimen.do?name=CASENT0071203-D01	B.L. Fisher et al.	19-Apr-2006	Madagascar	Fianarantsoa		Mahabo 20	Reserve Forestiere d'Agnalazaha, Mahabo, 42.9 km 215° Farafangana	-23.194	47.723		20
ASAMX739-06	CASENT0071203-D02	Arthropoda	Insecta	Hymenoptera	Formicidae		Anochetus	Anochetus madagascarensis	Brian Fisher	bfisher@calacademy.org						Mahabo 20	ex rotten log|littoral rainforest|1l|BOX-1229|http://www.antweb.org/specimen.do?name=CASENT0071203-D02	B.L. Fisher et al.	19-Apr-2006	Madagascar	Fianarantsoa		Mahabo 20	Reserve Forestiere d'Agnalazaha, Mahabo, 42.9 km 215° Farafangana	-23.194	47.723		20
ASAMX740-06	CASENT0071204-D01	Arthropoda	Insecta	Hymenoptera	Formicidae		Anochetus	Anochetus madagascarensis	Brian Fisher	bfisher@calacademy.org						Mahabo 20	under rotten log|littoral rainforest|1w|BOX-1229|http://www.antweb.org/specimen.do?name=CASENT0071204-D01	B.L. Fisher et al.	19-Apr-2006	Madagascar	Fianarantsoa		Mahabo 20	Reserve Forestiere d'Agnalazaha, Mahabo, 42.9 km 215° Farafangana	-23.194	47.723		20
ASAMX741-06	CASENT0071204-D02	Arthropoda	Insecta	Hymenoptera	Formicidae		Anochetus	Anochetus madagascarensis	Brian Fisher	bfisher@calacademy.org						Mahabo 20	under rotten log|littoral rainforest|1l|BOX-1229|http://www.antweb.org/specimen.do?name=CASENT0071204-D02	B.L. Fisher et al.	19-Apr-2006	Madagascar	Fianarantsoa		Mahabo 20	Reserve Forestiere d'Agnalazaha, Mahabo, 42.9 km 215° Farafangana	-23.194	47.723		20
ASAMX742-06	CASENT0071205-D01	Arthropoda	Insecta	Hymenoptera	Formicidae		Anochetus	Anochetus madagascarensis	Brian Fisher	bfisher@calacademy.org						Mahabo 20	ex rotten log|littoral rainforest|1w|BOX-1229|http://www.antweb.org/specimen.do?name=CASENT0071205-D01	B.L. Fisher et al.	19-Apr-2006	Madagascar	Fianarantsoa		Mahabo 20	Reserve Forestiere d'Agnalazaha, Mahabo, 42.9 km 215° Farafangana	-23.194	47.723		20
ASAMX743-06	CASENT0071205-D02	Arthropoda	Insecta	Hymenoptera	Formicidae		Anochetus	Anochetus madagascarensis	Brian Fisher	bfisher@calacademy.org						Mahabo 20	ex rotten log|littoral rainforest|1l|BOX-1229|http://www.antweb.org/specimen.do?name=CASENT0071205-D02	B.L. Fisher et al.	19-Apr-2006	Madagascar	Fianarantsoa		Mahabo 20	Reserve Forestiere d'Agnalazaha, Mahabo, 42.9 km 215° Farafangana	-23.194	47.723		20
ASAMX744-06	CASENT0071206-D01	Arthropoda	Insecta	Hymenoptera	Formicidae		Anochetus	Anochetus madagascarensis	Brian Fisher	bfisher@calacademy.org						Mahabo 20	under moss on rotten log|littoral rainforest|1w|BOX-1229|http://www.antweb.org/specimen.do?name=CASENT0071206-D01	B.L. Fisher et al.	19-Apr-2006	Madagascar	Fianarantsoa		Mahabo 20	Reserve Forestiere d'Agnalazaha, Mahabo, 42.9 km 215° Farafangana	-23.194	47.723		20
ASAMX745-06	CASENT0071207-D01	Arthropoda	Insecta	Hymenoptera	Formicidae		Anochetus	Anochetus madagascarensis	Brian Fisher	bfisher@calacademy.org						Mahabo 20	under moss, on ground|littoral rainforest|1w|BOX-1229|http://www.antweb.org/specimen.do?name=CASENT0071207-D01	B.L. Fisher et al.	19-Apr-2006	Madagascar	Fianarantsoa		Mahabo 20	Reserve Forestiere d'Agnalazaha, Mahabo, 42.9 km 215° Farafangana	-23.194	47.723		20
ASAMX746-06	CASENT0071208-D01	Arthropoda	Insecta	Hymenoptera	Formicidae		Anochetus	Anochetus madagascarensis	Brian Fisher	bfisher@calacademy.org						Mahabo 20	ex rotting tree stump|littoral rainforest|1w|BOX-1229|http://www.antweb.org/specimen.do?name=CASENT0071208-D01	B.L. Fisher et al.	19-Apr-2006	Madagascar	Fianarantsoa		Mahabo 20	Reserve Forestiere d'Agnalazaha, Mahabo, 42.9 km 215° Farafangana	-23.194	47.723		20
ASAMX747-06	CASENT0071214-D01	Arthropoda	Insecta	Hymenoptera	Formicidae		Anochetus	Anochetus grandidieri	Brian Fisher	bfisher@calacademy.org						Mahabo 20	ex rotten log|littoral rainforest|1w|BOX-1229|http://www.antweb.org/specimen.do?name=CASENT0071214-D01	B.L. Fisher et al.	19-Apr-2006	Madagascar	Fianarantsoa		Mahabo 20	Reserve Forestiere d'Agnalazaha, Mahabo, 42.9 km 215° Farafangana	-23.194	47.723		20
ASAMX773-06	CASENT0071449-D01	Arthropoda	Insecta	Hymenoptera	Formicidae		Anochetus	Anochetus grandidieri	Brian Fisher	bfisher@calacademy.org						Tsaranoro 950	ex rotten log|rainforest|1w|BOX-1229|http://www.antweb.org/specimen.do?name=CASENT0071449-D01	B.L. Fisher et al.	14-Apr-2006	Madagascar	Fianarantsoa		Tsaranoro 950	Tsaranoro, 32.8 km 229° Ambalavao	-22.085	46.776		950
ASAMX779-06	CASENT0071513-D01	Arthropoda	Insecta	Hymenoptera	Formicidae		Anochetus	Anochetus madagascarensis	Brian Fisher	bfisher@calacademy.org						Manombo 30	ex rotten log|rainforest|1w|BOX-1229|http://www.antweb.org/specimen.do?name=CASENT0071513-D01	B.L. Fisher et al.	21-Apr-2006	Madagascar	Fianarantsoa		Manombo 30	Reserve Speciale Manombo 24.5 km 228° Farafangana	-23.016	47.719		30
ASAMX780-06	CASENT0071514-D01	Arthropoda	Insecta	Hymenoptera	Formicidae		Anochetus	Anochetus madagascarensis	Brian Fisher	bfisher@calacademy.org						Manombo 30	ex rotten log|rainforest|1w|BOX-1229|http://www.antweb.org/specimen.do?name=CASENT0071514-D01	B.L. Fisher et al.	21-Apr-2006	Madagascar	Fianarantsoa		Manombo 30	Reserve Speciale Manombo 24.5 km 228° Farafangana	-23.016	47.719		30
ASAMX781-06	CASENT0071515-D01	Arthropoda	Insecta	Hymenoptera	Formicidae		Anochetus	Anochetus madagascarensis	Brian Fisher	bfisher@calacademy.org						Manombo 30	ex rotten log|rainforest|1w|BOX-1229|http://www.antweb.org/specimen.do?name=CASENT0071515-D01	B.L. Fisher et al.	22-Apr-2006	Madagascar	Fianarantsoa		Manombo 30	Reserve Speciale Manombo 24.5 km 228° Farafangana	-23.016	47.719		30
ASAMX782-06	CASENT0071516-D01	Arthropoda	Insecta	Hymenoptera	Formicidae		Anochetus	Anochetus madagascarensis	Brian Fisher	bfisher@calacademy.org						Manombo 30	ex rotten log|rainforest|1w|BOX-1229|http://www.antweb.org/specimen.do?name=CASENT0071516-D01	B.L. Fisher et al.	21-Apr-2006	Madagascar	Fianarantsoa		Manombo 30	Reserve Speciale Manombo 24.5 km 228° Farafangana	-23.016	47.719		30
ASAMX783-06	CASENT0071517-D01	Arthropoda	Insecta	Hymenoptera	Formicidae		Anochetus	Anochetus madagascarensis	Brian Fisher	bfisher@calacademy.org						Manombo 30	ex rotten log|rainforest|1w|BOX-1229|http://www.antweb.org/specimen.do?name=CASENT0071517-D01	B.L. Fisher et al.	21-Apr-2006	Madagascar	Fianarantsoa		Manombo 30	Reserve Speciale Manombo 24.5 km 228° Farafangana	-23.016	47.719		30
ASAMX785-06	CASENT0071519-D01	Arthropoda	Insecta	Hymenoptera	Formicidae		Anochetus	Anochetus madagascarensis	Brian Fisher	bfisher@calacademy.org						Manombo 30	ex rotten log|rainforest|1w|BOX-1229|http://www.antweb.org/specimen.do?name=CASENT0071519-D01	B.L. Fisher et al.	22-Apr-2006	Madagascar	Fianarantsoa		Manombo 30	Reserve Speciale Manombo 24.5 km 228° Farafangana	-23.016	47.719		30
ASAMX793-06	CASENT0071582-D01	Arthropoda	Insecta	Hymenoptera	Formicidae		Anochetus	Anochetus madagascarensis	Brian Fisher	bfisher@calacademy.org						Mahabo 20	ex rotten log|littoral rainforest|1w|BOX-1229|http://www.antweb.org/specimen.do?name=CASENT0071582-D01	B.L. Fisher et al.	20-Apr-2006	Madagascar	Fianarantsoa		Mahabo 20	Reserve Forestiere d'Agnalazaha, Mahabo, 42.9 km 215° Farafangana	-23.194	47.723		20
ASAMX796-06	CASENT0071590-D01	Arthropoda	Insecta	Hymenoptera	Formicidae		Anochetus	Anochetus madagascarensis	Brian Fisher	bfisher@calacademy.org						Mahabo 20	ex rotten log|littoral rainforest|1w|BOX-1229|http://www.antweb.org/specimen.do?name=CASENT0071590-D01	B.L. Fisher et al.	20-Apr-2006	Madagascar	Fianarantsoa		Mahabo 20	Reserve Forestiere d'Agnalazaha, Mahabo, 42.9 km 215° Farafangana	-23.194	47.723		20
ASAMX798-06	CASENT0071599-D01	Arthropoda	Insecta	Hymenoptera	Formicidae		Anochetus	Anochetus madagascarensis	Brian Fisher	bfisher@calacademy.org						Manombo 30	ex rotten log|rainforest|1w|BOX-1229|http://www.antweb.org/specimen.do?name=CASENT0071599-D01	B.L. Fisher et al.	21-Apr-2006	Madagascar	Fianarantsoa		Manombo 30	Reserve Speciale Manombo 24.5 km 228° Farafangana	-23.016	47.719		30
ASAMX804-06	CASENT0071631-D01	Arthropoda	Insecta	Hymenoptera	Formicidae		Anochetus	Anochetus madagascarensis	Brian Fisher	bfisher@calacademy.org						Manombo 30	ex rotten log|rainforest|1w|BOX-1229|http://www.antweb.org/specimen.do?name=CASENT0071631-D01	B.L. Fisher et al.	21-Apr-2006	Madagascar	Fianarantsoa		Manombo 30	Reserve Speciale Manombo 24.5 km 228° Farafangana	-23.016	47.719		30
ASAMX817-06	CASENT0071665-D01	Arthropoda	Insecta	Hymenoptera	Formicidae		Anochetus	Anochetus madagascarensis	Brian Fisher	bfisher@calacademy.org						Manombo 30	ex rotten log|rainforest|1w|BOX-1229|http://www.antweb.org/specimen.do?name=CASENT0071665-D01	B.L. Fisher et al.	21-Apr-2006	Madagascar	Fianarantsoa		Manombo 30	Reserve Speciale Manombo 24.5 km 228° Farafangana	-23.016	47.719		30
ASAMX826-06	CASENT0071690-D01	Arthropoda	Insecta	Hymenoptera	Formicidae		Anochetus	Anochetus madagascarensis	Brian Fisher	bfisher@calacademy.org						Manombo 30	ex rotting tree stump|rainforest|1w|BOX-1229|http://www.antweb.org/specimen.do?name=CASENT0071690-D01	B.L. Fisher et al.	21-Apr-2006	Madagascar	Fianarantsoa		Manombo 30	Reserve Speciale Manombo 24.5 km 228° Farafangana	-23.016	47.719		30
ASAMX827-06	CASENT0071691-D01	Arthropoda	Insecta	Hymenoptera	Formicidae		Anochetus	Anochetus madagascarensis	Brian Fisher	bfisher@calacademy.org						Manombo 30	ex rotten log|rainforest|1w|BOX-1229|http://www.antweb.org/specimen.do?name=CASENT0071691-D01	B.L. Fisher et al.	21-Apr-2006	Madagascar	Fianarantsoa		Manombo 30	Reserve Speciale Manombo 24.5 km 228° Farafangana	-23.016	47.719		30
ASAMX828-06	CASENT0071692-D01	Arthropoda	Insecta	Hymenoptera	Formicidae		Anochetus	Anochetus madagascarensis	Brian Fisher	bfisher@calacademy.org						Manombo 30	ex dead branch above ground|rainforest|1w|BOX-1229|http://www.antweb.org/specimen.do?name=CASENT0071692-D01	B.L. Fisher et al.	21-Apr-2006	Madagascar	Fianarantsoa		Manombo 30	Reserve Speciale Manombo 24.5 km 228° Farafangana	-23.016	47.719		30
ASAMX836-06	CASENT0071737-D01	Arthropoda	Insecta	Hymenoptera	Formicidae		Anochetus	Anochetus madagascarensis	Brian Fisher	bfisher@calacademy.org						Manakara 10	ex soil, at base of tree|urban gardens, coastal Casuarina equisetifolia|1w|BOX-1229|http://www.antweb.org/specimen.do?name=CASENT0071737-D01	B.L.Fisher et al.	25-Apr-2006	Madagascar	Fianarantsoa		Manakara 10	Manakara	-22.148	48.023		10
ASAMX837-06	CASENT0071786-D01	Arthropoda	Insecta	Hymenoptera	Formicidae		Anochetus	Anochetus madagascarensis	Brian Fisher	bfisher@calacademy.org						Manakara 10	ex soil, at base of tree|urban gardens, coastal Casuarina equisetifolia|1w|BOX-1229|http://www.antweb.org/specimen.do?name=CASENT0071786-D01	B.L.Fisher et al.	25-Apr-2006	Madagascar	Fianarantsoa		Manakara 10	Manakara	-22.148	48.023		10
ASAMY283-07	CASENT0071839-D01	Arthropoda	Insecta	Hymenoptera	Formicidae		Anochetus	Anochetus grandidieri	Brian Fisher	bfisher@calacademy.org						Mandrisy	sifted litter|littoral rainforest|1w|BOX-1942|http://www.antweb.org/specimen.do?name=CASENT0071839-D01	B.L.Fisher et al.	12-Nov-2005	Madagascar	Toamasina		Mandrisy	Foret d'Analava Mandrisy, 5.9 km 195ºAntanambe	-16.486	49.847		10
ASAMY284-07	CASENT0071840-D01	Arthropoda	Insecta	Hymenoptera	Formicidae		Anochetus	Anochetus grandidieri	Brian Fisher	bfisher@calacademy.org						Mandrisy	sifted litter|littoral rainforest|1w|BOX-1942|http://www.antweb.org/specimen.do?name=CASENT0071840-D01	B.L.Fisher et al.	12-Nov-2005	Madagascar	Toamasina		Mandrisy	Foret d'Analava Mandrisy, 5.9 km 195ºAntanambe	-16.486	49.847		10
JDWAM802-05	CASENT0074488-D01	Arthropoda	Insecta	Hymenoptera	Formicidae		Anochetus	Anochetus grandidieri	Brian Fisher	bfisher@calacademy.org						Analamay 1068	EB09 sifted litter (leaf mold, rotten wood)|montane rainforest|1w|BOX-0167|http://www.antweb.org/specimen.do?name=CASENT0074488-D01	Malagasy ant team	21-Mar-2004	Madagascar	Toamasina		Analamay 1068	Analamay	-18.806	48.337		1068
ASAM015-05	CASENT0076275-D01	Arthropoda	Insecta	Hymenoptera	Formicidae		Anochetus	Anochetus goodmani	Brian Fisher	bfisher@calacademy.org						Binara 375	EF11 under stone|tropical dry forest|1w|BOX-0168|http://www.antweb.org/specimen.do?name=CASENT0076275-D01	B.L.Fisher	02-Dec-2003	Madagascar	Antsiranana, Faritany d'		Binara 375	Foret de Binara, 7.5 km 230° SW Daraina	-13.255	49.617		375
JDWAM843-05	CASENT0076507-D01	Arthropoda	Insecta	Hymenoptera	Formicidae		Anochetus	Anochetus goodmani	Brian Fisher	bfisher@calacademy.org						Antsahabe 550	EF11 under stone|tropical dry forest|1w|BOX-0167|http://www.antweb.org/specimen.do?name=CASENT0076507-D01	B.L.Fisher	13-Dec-2003	Madagascar	Antsiranana, Faritany d'		Antsahabe 550	Foret d' Antsahabe, 11.4km 275° W Daraina	-13.212	49.557		550
ASAM018-05	CASENT0076507-D02	Arthropoda	Insecta	Hymenoptera	Formicidae		Anochetus	Anochetus goodmani	Brian Fisher	bfisher@calacademy.org						Antsahabe 550	EF11 under stone|tropical dry forest|1w|BOX-0168|http://www.antweb.org/specimen.do?name=CASENT0076507-D02	B.L.Fisher	13-Dec-2003	Madagascar	Antsiranana, Faritany d'		Antsahabe 550	Foret d' Antsahabe, 11.4km 275° W Daraina	-13.212	49.557		550
ASAM016-05	CASENT0076665-D01	Arthropoda	Insecta	Hymenoptera	Formicidae		Anochetus	Anochetus goodmani	Brian Fisher	bfisher@calacademy.org						Antsahabe 550	EF11 under stone|tropical dry forest|1w|BOX-0168|http://www.antweb.org/specimen.do?name=CASENT0076665-D01	B.L.Fisher	13-Dec-2003	Madagascar	Antsiranana, Faritany d'		Antsahabe 550	Foret d' Antsahabe, 11.4km 275° W Daraina	-13.212	49.557		550
ASAM017-05	CASENT0076665-D02	Arthropoda	Insecta	Hymenoptera	Formicidae		Anochetus	Anochetus goodmani	Brian Fisher	bfisher@calacademy.org						Antsahabe 550	EF11 under stone|tropical dry forest|1w|BOX-0168|http://www.antweb.org/specimen.do?name=CASENT0076665-D02	B.L.Fisher	13-Dec-2003	Madagascar	Antsiranana, Faritany d'		Antsahabe 550	Foret d' Antsahabe, 11.4km 275° W Daraina	-13.212	49.557		550
ASAM3405-05	CASENT0076928-D01	Arthropoda	Insecta	Hymenoptera	Formicidae		Odontomachus	Odontomachus coquereli	Brian Fisher	bfisher@calacademy.org						Marojejy 450	EC12 ground forager(s)|rainforest|right hind leg of worker|BOX-0588|http://www.antweb.org/specimen.do?name=CASENT0076928-D01	B.L.Fisher et al.	12-Nov-2003	Madagascar	Antsiranana, Faritany d'		Marojejy 450	Parc National de Marojejy, Manantenina River, 28.0 km 38° NE Andapa, 8.2 km 333° NNW Manantenina	-14.437	49.775		450
ASAM3406-05	CASENT0076934-D01	Arthropoda	Insecta	Hymenoptera	Formicidae		Odontomachus	Odontomachus coquereli	Brian Fisher	bfisher@calacademy.org						Marojejy 450	EC10 ex rotten branch on ground|rainforest|right hind leg of worker|BOX-0588|http://www.antweb.org/specimen.do?name=CASENT0076934-D01	B.L.Fisher et al.	12-Nov-2003	Madagascar	Antsiranana, Faritany d'		Marojejy 450	Parc National de Marojejy, Manantenina River, 28.0 km 38° NE Andapa, 8.2 km 333° NNW Manantenina	-14.437	49.775		450
ASAM3410-05	CASENT0077046-D01	Arthropoda	Insecta	Hymenoptera	Formicidae		Odontomachus	Odontomachus coquereli	Brian Fisher	bfisher@calacademy.org						Marojejy 450	EC10 ex rotten branch on ground|rainforest|right hind leg of worker|BOX-0588|http://www.antweb.org/specimen.do?name=CASENT0077046-D01	B.L.Fisher et al.	12-Nov-2003	Madagascar	Antsiranana, Faritany d'		Marojejy 450	Parc National de Marojejy, Manantenina River, 28.0 km 38° NE Andapa, 8.2 km 333° NNW Manantenina	-14.437	49.775		450
JDWAM803-05	CASENT0077410-D01	Arthropoda	Insecta	Hymenoptera	Formicidae		Anochetus	Anochetus grandidieri	Brian Fisher	bfisher@calacademy.org						Binara 650-800	EC18 ground nest|rainforest|2w|BOX-0167|http://www.antweb.org/specimen.do?name=CASENT0077410-D01	B.L.Fisher	03-Dec-2003	Madagascar	Antsiranana, Faritany d'		Binara 650-800	Foret de Binara, 9.1km 233° SW Daraina	-13.263	49.603		725
ASAM878-05	CASENT0095663-D01	Arthropoda	Insecta	Hymenoptera	Formicidae		Odontomachus	Odontomachus coquereli	Brian Fisher	bfisher@calacademy.org						Mahavelona (Foulpointe)	sifting litter|sandy forest|right hind leg of worker|BOX-0422|http://www.antweb.org/specimen.do?name=CASENT0095663-D01	A. Pauly	01-Aug-1995	Madagascar	Toamasina		Mahavelona (Foulpointe)	Mahavelona (Foulpointe)	-17.667	49.5
ASAM3542-05	CASENT0095663-D02	Arthropoda	Insecta	Hymenoptera	Formicidae		Odontomachus	Odontomachus coquereli	Brian Fisher	bfisher@calacademy.org						Mahavelona (Foulpointe)	sifting litter|sandy forest|right hind leg of worker|BOX-0588|http://www.antweb.org/specimen.do?name=CASENT0095663-D02	A. Pauly	01-Aug-1995	Madagascar	Toamasina		Mahavelona (Foulpointe)	Mahavelona (Foulpointe)	-17.667	49.5
ASAM3544-05	CASENT0096411-D01	Arthropoda	Insecta	Hymenoptera	Formicidae		Odontomachus	Odontomachus troglodytes	Brian Fisher	bfisher@calacademy.org						Antseranambe	taken at light at night||right hind leg of male|BOX-0588|http://www.antweb.org/specimen.do?name=CASENT0096411-D01	ORSTROM	01-Nov-1994	Madagascar	Toamasina		Antseranambe	Rianila Bassin, Riv: Rianila (Ivohitra), Antseranambe
ASAM3545-05	CASENT0096412-D01	Arthropoda	Insecta	Hymenoptera	Formicidae		Odontomachus	Odontomachus troglodytes	Brian Fisher	bfisher@calacademy.org						Antseranambe	taken at light at night||right hind leg of male|BOX-0588|http://www.antweb.org/specimen.do?name=CASENT0096412-D01	ORSTROM	01-Nov-1994	Madagascar	Toamasina		Antseranambe	Rianila Bassin, Riv: Rianila (Ivohitra), Antseranambe
ASAM3546-05	CASENT0096670-D01	Arthropoda	Insecta	Hymenoptera	Formicidae		Odontomachus	Odontomachus troglodytes	Brian Fisher	bfisher@calacademy.org						Ambodifaho	taken at light at night||right hind leg of male|BOX-0588|http://www.antweb.org/specimen.do?name=CASENT0096670-D01	ORSTROM	31-Oct-1994	Madagascar			Ambodifaho	Rianila Bassin, Riv: Rongaronga, Ambodifaho
ASAM3547-05	CASENT0096671-D01	Arthropoda	Insecta	Hymenoptera	Formicidae		Odontomachus	Odontomachus troglodytes	Brian Fisher	bfisher@calacademy.org						Ambodifaho	taken at light at night||right hind leg of male|BOX-0588|http://www.antweb.org/specimen.do?name=CASENT0096671-D01	ORSTROM	31-Oct-1994	Madagascar			Ambodifaho	Rianila Bassin, Riv: Rongaronga, Ambodifaho
ASAM3548-05	CASENT0096818-D01	Arthropoda	Insecta	Hymenoptera	Formicidae		Odontomachus	Odontomachus troglodytes	Brian Fisher	bfisher@calacademy.org						Gri-gri	taken at light at night||right hind leg of male|BOX-0588|http://www.antweb.org/specimen.do?name=CASENT0096818-D01	ORSTROM	18-Jan-1996	Madagascar	Toamasina		Gri-gri	Rianila Bassin, Riv: Ilazana, Gri-gri	-18.982	48.611
ASAM3550-05	CASENT0097637-D01	Arthropoda	Insecta	Hymenoptera	Formicidae		Odontomachus	Odontomachus troglodytes	Brian Fisher	bfisher@calacademy.org						Ampasipotsy	taken at light at night||right hind leg of male|BOX-0588|http://www.antweb.org/specimen.do?name=CASENT0097637-D01	ORSTROM	05-Nov-1994	Madagascar	Antananarivo		Ampasipotsy	Rianila Bassin, Riv: Santaravina, Ampasipotsy-pont routier
ASAM3552-05	CASENT0097641-D01	Arthropoda	Insecta	Hymenoptera	Formicidae		Odontomachus	Odontomachus troglodytes	Brian Fisher	bfisher@calacademy.org						Tanambao	taken at light at night||right hind leg of male|BOX-0588|http://www.antweb.org/specimen.do?name=CASENT0097641-D01	ORSTROM	05-Nov-1994	Madagascar			Tanambao	Rianila Bassin, Riv: Sandragniro, Tanambao-Pont routier
ASAM3553-05	CASENT0097972-D01	Arthropoda	Insecta	Hymenoptera	Formicidae		Odontomachus	Odontomachus troglodytes	Brian Fisher	bfisher@calacademy.org						Ranomafana RN2	taken at light at night||right hind leg of male|BOX-0588|http://www.antweb.org/specimen.do?name=CASENT0097972-D01	ORSTROM	28-Oct-1993	Madagascar			Ranomafana RN2	Rianila Bassin, Riv: Ranomafana Aff. de laroka, Ranomafana RN2
ASAM3554-05	CASENT0097973-D01	Arthropoda	Insecta	Hymenoptera	Formicidae		Odontomachus	Odontomachus troglodytes	Brian Fisher	bfisher@calacademy.org						Ranomafana RN2	taken at light at night||right hind leg of male|BOX-0588|http://www.antweb.org/specimen.do?name=CASENT0097973-D01	ORSTROM	28-Oct-1993	Madagascar			Ranomafana RN2	Rianila Bassin, Riv: Ranomafana Aff. de laroka, Ranomafana RN2
ASAM030-05	CASENT0104543-D01	Arthropoda	Insecta	Hymenoptera	Formicidae		Anochetus	Anochetus goodmani	Brian Fisher	bfisher@calacademy.org						Andavakoera 425	EC11 under stone|rainforest|1p|BOX-0168|http://www.antweb.org/specimen.do?name=CASENT0104543-D01	B.L.Fisher	16-Dec-2003	Madagascar	Antsiranana, Faritany d'		Andavakoera 425	Foret d' Andavakoera, 21.4km 75° ENE Ambilobe; 4.6km 356° N Betsiaka	-13.118	49.23		425
ASAM031-05	CASENT0104543-D02	Arthropoda	Insecta	Hymenoptera	Formicidae		Anochetus	Anochetus goodmani	Brian Fisher	bfisher@calacademy.org						Andavakoera 425	EC11 under stone|rainforest|1p|BOX-0168|http://www.antweb.org/specimen.do?name=CASENT0104543-D02	B.L.Fisher	16-Dec-2003	Madagascar	Antsiranana, Faritany d'		Andavakoera 425	Foret d' Andavakoera, 21.4km 75° ENE Ambilobe; 4.6km 356° N Betsiaka	-13.118	49.23		425
ASAM3574-05	CASENT0107134-D01	Arthropoda	Insecta	Hymenoptera	Formicidae		Odontomachus	Odontomachus coquereli	Brian Fisher	bfisher@calacademy.org						Ambanitaza 240	EC13 ex rotten log|rainforest|1w|BOX-0588|http://www.antweb.org/specimen.do?name=CASENT0107134-D01	B.L.Fisher	27-Nov-2004	Madagascar	Antsiranana, Faritany d'		Ambanitaza 240	Foret Ambanitaza, 26.1 km 347° Antalaha	-14.679	50.184		240
ASAM3579-05	CASENT0107412-D01	Arthropoda	Insecta	Hymenoptera	Formicidae		Odontomachus	Odontomachus coquereli	Brian Fisher	bfisher@calacademy.org						Ambanitaza 240	EC13 ex rotten log|rainforest|1w|BOX-0588|http://www.antweb.org/specimen.do?name=CASENT0107412-D01	B.L.Fisher	27-Nov-2004	Madagascar	Antsiranana, Faritany d'		Ambanitaza 240	Foret Ambanitaza, 26.1 km 347° Antalaha	-14.679	50.184		240
JDWAM728-05	CASENT0107810-D01	Arthropoda	Insecta	Hymenoptera	Formicidae		Anochetus	Anochetus madagascarensis	Brian Fisher	bfisher@calacademy.org						Ambohimanga 250	EF13 ex rotten log|tropical dry forest|1w|BOX-0052|http://www.antweb.org/specimen.do?name=CASENT0107810-D01	B.L.Fisher	13-Dec-2004	Madagascar	Mahajanga		Ambohimanga 250	Foret Ambohimanga, 26.1 km 314° Mampikony	-15.963	47.438		250
ASAMI339-07	CASENT0110728-D01	Arthropoda	Insecta	Hymenoptera	Formicidae		Odontomachus	Odontomachus troglodytes	Brian Fisher	bfisher@calacademy.org						Fenoarivo BB	ex rotting tree stump|beach/coastal scrub|1w|BOX-1935|http://www.antweb.org/specimen.do?name=CASENT0110728-D01	B. Blaimer, F.N. Raharimalala	05-Aug-2006	Madagascar	Toamasina		Fenoarivo BB	Fenoarivo, 85.7 km 13° Toamasina	-17.381	49.415		10
ASAMI394-07	CASENT0114439-D01	Arthropoda	Insecta	Hymenoptera	Formicidae		Odontomachus	Odontomachus troglodytes	Brian Fisher	bfisher@calacademy.org						Antetezambaro BB	ground nest|urban garden|1w|BOX-1935|http://www.antweb.org/specimen.do?name=CASENT0114439-D01	B. Blaimer, F.N. Raharimalala	01-Aug-2006	Madagascar	Toamasina		Antetezambaro BB	Antetezambaro, 16.0 km 21° Toamasina	-17.053	49.567		10
ASAMI399-07	CASENT0114447-D01	Arthropoda	Insecta	Hymenoptera	Formicidae		Odontomachus	Odontomachus troglodytes	Brian Fisher	bfisher@calacademy.org						Antetezambaro BB	ground forager(s)|urban garden|1w|BOX-1935|http://www.antweb.org/specimen.do?name=CASENT0114447-D01	B. Blaimer, F.N. Raharimalala	01-Aug-2006	Madagascar	Toamasina		Antetezambaro BB	Antetezambaro, 16.0 km 21° Toamasina	-17.053	49.567		10
ASAMI404-07	CASENT0114453-D01	Arthropoda	Insecta	Hymenoptera	Formicidae		Odontomachus	Odontomachus troglodytes	Brian Fisher	bfisher@calacademy.org						Tanambao Nosibe BB	ex rot pocket above ground|coastal scrub|1w|BOX-1935|http://www.antweb.org/specimen.do?name=CASENT0114453-D01	B. Blaimer, F.N. Raharimalala	02-Aug-2006	Madagascar	Toamasina		Tanambao Nosibe BB	Tanambao Nosibe, 29.6 km 23° Toamasina	-17.891	49.456		15
ASAMI407-07	CASENT0114458-D01	Arthropoda	Insecta	Hymenoptera	Formicidae		Odontomachus	Odontomachus troglodytes	Brian Fisher	bfisher@calacademy.org						Tanambao Nosibe BB	under moss, above ground|coastal scrub|1w|BOX-1935|http://www.antweb.org/specimen.do?name=CASENT0114458-D01	B. Blaimer, F.N. Raharimalala	02-Aug-2006	Madagascar	Toamasina		Tanambao Nosibe BB	Tanambao Nosibe, 29.6 km 23° Toamasina	-17.891	49.456		15
ASAMI409-07	CASENT0114896-D01	Arthropoda	Insecta	Hymenoptera	Formicidae		Odontomachus	Odontomachus troglodytes	Brian Fisher	bfisher@calacademy.org						Mahambo BB	ex root mat, ground layer|urban garden|1w|BOX-1936|http://www.antweb.org/specimen.do?name=CASENT0114896-D01	B. Blaimer, F.N. Raharimalala	04-Aug-2006	Madagascar	Toamasina		Mahambo BB	Mahambo, 73.8 km 16° Toamasina	-17.489	49.452		10
ASAMI410-07	CASENT0114897-D01	Arthropoda	Insecta	Hymenoptera	Formicidae		Odontomachus	Odontomachus troglodytes	Brian Fisher	bfisher@calacademy.org						Mahambo BB	ground forager(s)|urban garden|1w|BOX-1936|http://www.antweb.org/specimen.do?name=CASENT0114897-D01	B. Blaimer, F.N. Raharimalala	04-Aug-2006	Madagascar	Toamasina		Mahambo BB	Mahambo, 73.8 km 16° Toamasina	-17.489	49.452		10
ASAMI428-07	CASENT0114915-D01	Arthropoda	Insecta	Hymenoptera	Formicidae		Odontomachus	Odontomachus troglodytes	Brian Fisher	bfisher@calacademy.org						Fenoarivo BB	ex root mat, ground layer|beach/coastal scrub|1w|BOX-1935|http://www.antweb.org/specimen.do?name=CASENT0114915-D01	B. Blaimer, F.N. Raharimalala	05-Aug-2006	Madagascar	Toamasina		Fenoarivo BB	Fenoarivo, 85.7 km 13° Toamasina	-17.381	49.415		10
ASAMI452-07	CASENT0116067-D01	Arthropoda	Insecta	Hymenoptera	Formicidae		Odontomachus	Odontomachus troglodytes	Brian Fisher	bfisher@calacademy.org						Tanambao Nosibe BB	ex root mat, ground layer|urban garden|1w|BOX-1935|http://www.antweb.org/specimen.do?name=CASENT0116067-D01	B. Blaimer, F.N. Raharimalala	02-Aug-2006	Madagascar	Toamasina		Tanambao Nosibe BB	Tanambao Nosibe, 29.6 km 23° Toamasina	-17.891	49.456		15
ASAMI456-07	CASENT0116074-D01	Arthropoda	Insecta	Hymenoptera	Formicidae		Odontomachus	Odontomachus troglodytes	Brian Fisher	bfisher@calacademy.org						Antaratasy BB	ex root mat, ground layer|urban garden|1w|BOX-1935|http://www.antweb.org/specimen.do?name=CASENT0116074-D01	B. Blaimer, F.N. Raharimalala	02-Aug-2006	Madagascar	Toamasina		Antaratasy BB	Antaratasy, 43.5 km 23° Toamasina	-17.767	49.478		15
ASAMI457-07	CASENT0116075-D01	Arthropoda	Insecta	Hymenoptera	Formicidae		Odontomachus	Odontomachus troglodytes	Brian Fisher	bfisher@calacademy.org						Antaratasy BB	ex root mat, ground layer|urban garden|1w|BOX-1935|http://www.antweb.org/specimen.do?name=CASENT0116075-D01	B. Blaimer, F.N. Raharimalala	02-Aug-2006	Madagascar	Toamasina		Antaratasy BB	Antaratasy, 43.5 km 23° Toamasina	-17.767	49.478		15
ASAMI483-07	CASENT0116107-D01	Arthropoda	Insecta	Hymenoptera	Formicidae		Odontomachus	Odontomachus troglodytes	Brian Fisher	bfisher@calacademy.org						Ambalahasina BB	ground forager(s)|coastal scrub|1w|BOX-1935|http://www.antweb.org/specimen.do?name=CASENT0116107-D01	B. Blaimer, F.N. Raharimalala	03-Aug-2006	Madagascar	Toamasina		Ambalahasina BB	Ambalahasina, 62.4 km 19° Toamasina	-17.595	49.468		15
ASAMI490-07	CASENT0116117-D01	Arthropoda	Insecta	Hymenoptera	Formicidae		Odontomachus	Odontomachus troglodytes	Brian Fisher	bfisher@calacademy.org						Ambalahasina BB	ex rot pocket above ground|urban garden|1w|BOX-1935|http://www.antweb.org/specimen.do?name=CASENT0116117-D01	B. Blaimer, F.N. Raharimalala	03-Aug-2006	Madagascar	Toamasina		Ambalahasina BB	Ambalahasina, 62.4 km 19° Toamasina	-17.595	49.468		15
ASAMI491-07	CASENT0116118-D01	Arthropoda	Insecta	Hymenoptera	Formicidae		Odontomachus	Odontomachus troglodytes	Brian Fisher	bfisher@calacademy.org						Ambalahasina BB	ground forager(s)|urban garden|1w|BOX-1935|http://www.antweb.org/specimen.do?name=CASENT0116118-D01	B. Blaimer, F.N. Raharimalala	03-Aug-2006	Madagascar	Toamasina		Ambalahasina BB	Ambalahasina, 62.4 km 19° Toamasina	-17.595	49.468		15
ASAMI503-07	CASENT0118184-D01	Arthropoda	Insecta	Hymenoptera	Formicidae		Odontomachus	Odontomachus troglodytes	Brian Fisher	bfisher@calacademy.org						Ampasina-Maningory BB	ex rotten log|urban garden|1w|BOX-1936|http://www.antweb.org/specimen.do?name=CASENT0118184-D01	B. Blaimer, F.N. Raharimalala	06-Aug-2006	Madagascar	Toamasina		Ampasina-Maningory BB	Ampasina-Maningory, 104 km 13° Toamasina	-17.215	49.406		20
ASAMI504-07	CASENT0118186-D01	Arthropoda	Insecta	Hymenoptera	Formicidae		Anochetus	Anochetus madagascarensis	Brian Fisher	bfisher@calacademy.org						Ampasina-Maningory BB	on tree trunk|urban garden|1w|BOX-1936|http://www.antweb.org/specimen.do?name=CASENT0118186-D01	B. Blaimer, F.N. Raharimalala	06-Aug-2006	Madagascar	Toamasina		Ampasina-Maningory BB	Ampasina-Maningory, 104 km 13° Toamasina	-17.215	49.406		20
ASAMI511-07	CASENT0118195-D01	Arthropoda	Insecta	Hymenoptera	Formicidae		Anochetus	Anochetus madagascarensis	Brian Fisher	bfisher@calacademy.org						Ampasina-Maningory BB	on tree trunk|urban garden|1w|BOX-1936|http://www.antweb.org/specimen.do?name=CASENT0118195-D01	B. Blaimer, F.N. Raharimalala	06-Aug-2006	Madagascar	Toamasina		Ampasina-Maningory BB	Ampasina-Maningory, 104 km 13° Toamasina	-17.215	49.406		20
ASAMI518-07	CASENT0118203-D01	Arthropoda	Insecta	Hymenoptera	Formicidae		Odontomachus	Odontomachus troglodytes	Brian Fisher	bfisher@calacademy.org						Ampasimbe BB	ex root mat, ground layer|urban garden|1w|BOX-1936|http://www.antweb.org/specimen.do?name=CASENT0118203-D01	B. Blaimer, F.N. Raharimalala	07-Aug-2006	Madagascar	Toamasina		Ampasimbe BB	Ampasimbe, 118 km 17° Toamasina	-17.093	49.478		25
ASAMI519-07	CASENT0118204-D01	Arthropoda	Insecta	Hymenoptera	Formicidae		Odontomachus	Odontomachus troglodytes	Brian Fisher	bfisher@calacademy.org						Ampasimbe BB	ground forager(s)|urban garden|1w|BOX-1936|http://www.antweb.org/specimen.do?name=CASENT0118204-D01	B. Blaimer, F.N. Raharimalala	07-Aug-2006	Madagascar	Toamasina		Ampasimbe BB	Ampasimbe, 118 km 17° Toamasina	-17.093	49.478		25
ASAMY005-07	CASENT0118221-D01	Arthropoda	Insecta	Hymenoptera	Formicidae		Odontomachus	Odontomachus troglodytes	Brian Fisher	bfisher@calacademy.org						Anosintany BB	ex rotting tree stump|coastal scrub|1w|BOX-1935|http://www.antweb.org/specimen.do?name=CASENT0118221-D01	B. Blaimer, F.N. Raharimalala	08-Aug-2006	Madagascar	Toamasina		Anosintany BB	Anosintany, 139 km 21° Toamasina	-16.911	49.589		10
ASAMY368-07	CASENT0119086-D01	Arthropoda	Insecta	Hymenoptera	Formicidae		Anochetus	Anochetus grandidieri	Brian Fisher	bfisher@calacademy.org						Papango 940	ex rotten log|rainforest|1w|BOX-1943|http://www.antweb.org/specimen.do?name=CASENT0119086-D01	B.L.Fisher et al.	14-Nov-2006	Madagascar	Fianarantsoa		Papango 940	Parc National Befotaka-Midongy, Papango 27.7km S Midongy-Sud, Mount Papango	-23.835	46.964		940
ASAMY369-07	CASENT0119087-D01	Arthropoda	Insecta	Hymenoptera	Formicidae		Anochetus	Anochetus grandidieri	Brian Fisher	bfisher@calacademy.org						Papango 940	ex rotten log|rainforest|1w|BOX-1943|http://www.antweb.org/specimen.do?name=CASENT0119087-D01	B.L.Fisher et al.	14-Nov-2006	Madagascar	Fianarantsoa		Papango 940	Parc National Befotaka-Midongy, Papango 27.7km S Midongy-Sud, Mount Papango	-23.835	46.964		940
ASAMY370-07	CASENT0119088-D01	Arthropoda	Insecta	Hymenoptera	Formicidae		Anochetus	Anochetus grandidieri	Brian Fisher	bfisher@calacademy.org						Papango 940	ex rotten log|rainforest|1w|BOX-1943|http://www.antweb.org/specimen.do?name=CASENT0119088-D01	B.L.Fisher et al.	14-Nov-2006	Madagascar	Fianarantsoa		Papango 940	Parc National Befotaka-Midongy, Papango 27.7km S Midongy-Sud, Mount Papango	-23.835	46.964		940
ASAMY374-07	CASENT0119668-D01	Arthropoda	Insecta	Hymenoptera	Formicidae		Anochetus	Anochetus grandidieri	Brian Fisher	bfisher@calacademy.org						Papango 940	under rotten log|rainforest|1w|BOX-1943|http://www.antweb.org/specimen.do?name=CASENT0119668-D01	B.L.Fisher et al.	15-Nov-2006	Madagascar	Fianarantsoa		Papango 940	Parc National Befotaka-Midongy, Papango 27.7km S Midongy-Sud, Mount Papango	-23.835	46.964		940
ASAMY375-07	CASENT0119672-D01	Arthropoda	Insecta	Hymenoptera	Formicidae		Anochetus	Anochetus grandidieri	Brian Fisher	bfisher@calacademy.org						Papango 940	ex rotten log|rainforest|1w|BOX-1943|http://www.antweb.org/specimen.do?name=CASENT0119672-D01	B.L.Fisher et al.	14-Nov-2006	Madagascar	Fianarantsoa		Papango 940	Parc National Befotaka-Midongy, Papango 27.7km S Midongy-Sud, Mount Papango	-23.835	46.964		940
ASAMY376-07	CASENT0119673-D01	Arthropoda	Insecta	Hymenoptera	Formicidae		Anochetus	Anochetus grandidieri	Brian Fisher	bfisher@calacademy.org						Papango 940	ex rotten log|rainforest|1w|BOX-1943|http://www.antweb.org/specimen.do?name=CASENT0119673-D01	B.L.Fisher et al.	14-Nov-2006	Madagascar	Fianarantsoa		Papango 940	Parc National Befotaka-Midongy, Papango 27.7km S Midongy-Sud, Mount Papango	-23.835	46.964		940
ASAMY392-07	CASENT0120030-D01	Arthropoda	Insecta	Hymenoptera	Formicidae		Anochetus	Anochetus madagascarensis	Brian Fisher	bfisher@calacademy.org						Mandena 2006	ex rotten log|littoral rainforest|1w|BOX-1943|http://www.antweb.org/specimen.do?name=CASENT0120030-D01	B.L.Fisher et al.	05-Dec-2006	Madagascar	Toliara		Mandena 2006	Foret Mandena 8.5 km N Tolagnaro	-24.953	47.002		20
ASAMY393-07	CASENT0120031-D01	Arthropoda	Insecta	Hymenoptera	Formicidae		Anochetus	Anochetus madagascarensis	Brian Fisher	bfisher@calacademy.org						Ando Tanatana	ex rotten log|rainforest|1w|BOX-1943|http://www.antweb.org/specimen.do?name=CASENT0120031-D01	B.L.Fisher et al.	24-Nov-2006	Madagascar	Toliara		Ando Tanatana	Parc National Andohahela, Col de Tanatana, 33.3km NW Tolagnaro	-24.758	46.854		275
ASAMY394-07	CASENT0120032-D01	Arthropoda	Insecta	Hymenoptera	Formicidae		Anochetus	Anochetus madagascarensis	Brian Fisher	bfisher@calacademy.org						Manatantely 100	ex rotten log|rainforest|1w|BOX-1943|http://www.antweb.org/specimen.do?name=CASENT0120032-D01	B.L.Fisher et al.	27-Nov-2006	Madagascar	Toliara		Manatantely 100	8.9km NW Tolagnaro	-24.982	46.926		100
ASAMY395-07	CASENT0120033-D01	Arthropoda	Insecta	Hymenoptera	Formicidae		Anochetus	Anochetus madagascarensis	Brian Fisher	bfisher@calacademy.org						Ivohibe 200	ex rotten log|rainforest|1w|BOX-1943|http://www.antweb.org/specimen.do?name=CASENT0120033-D01	B.L.Fisher et al.	03-Dec-2006	Madagascar	Toliara		Ivohibe 200	Foret Ivohibe 55.0km N Tolagnaro	-24.569	47.204		200
ASAMY396-07	CASENT0120034-D01	Arthropoda	Insecta	Hymenoptera	Formicidae		Anochetus	Anochetus madagascarensis	Brian Fisher	bfisher@calacademy.org						Mandena 2006	under rotten log|littoral rainforest|1w|BOX-1943|http://www.antweb.org/specimen.do?name=CASENT0120034-D01	B.L.Fisher et al.	05-Dec-2006	Madagascar	Toliara		Mandena 2006	Foret Mandena 8.5 km N Tolagnaro	-24.953	47.002		20
ASAMY397-07	CASENT0120036-D01	Arthropoda	Insecta	Hymenoptera	Formicidae		Anochetus	Anochetus madagascarensis	Brian Fisher	bfisher@calacademy.org						Ando Tanatana	ex rotten log|rainforest|1w|BOX-1943|http://www.antweb.org/specimen.do?name=CASENT0120036-D01	B.L.Fisher et al.	22-Nov-2006	Madagascar	Toliara		Ando Tanatana	Parc National Andohahela, Col de Tanatana, 33.3km NW Tolagnaro	-24.758	46.854		275
ASAMY398-07	CASENT0120037-D01	Arthropoda	Insecta	Hymenoptera	Formicidae		Anochetus	Anochetus madagascarensis	Brian Fisher	bfisher@calacademy.org						Ando Tanatana	ex rotten log|rainforest|1w|BOX-1943|http://www.antweb.org/specimen.do?name=CASENT0120037-D01	B.L.Fisher et al.	23-Nov-2006	Madagascar	Toliara		Ando Tanatana	Parc National Andohahela, Col de Tanatana, 33.3km NW Tolagnaro	-24.758	46.854		275
ASAMY399-07	CASENT0120038-D01	Arthropoda	Insecta	Hymenoptera	Formicidae		Anochetus	Anochetus madagascarensis	Brian Fisher	bfisher@calacademy.org						Ando Tanatana	ex dead tree stump|rainforest|1w|BOX-1943|http://www.antweb.org/specimen.do?name=CASENT0120038-D01	B.L.Fisher et al.	23-Nov-2006	Madagascar	Toliara		Ando Tanatana	Parc National Andohahela, Col de Tanatana, 33.3km NW Tolagnaro	-24.758	46.854		275
ASAMY400-07	CASENT0120039-D01	Arthropoda	Insecta	Hymenoptera	Formicidae		Anochetus	Anochetus madagascarensis	Brian Fisher	bfisher@calacademy.org						Ivohibe 200	ex rotten log|rainforest|1w|BOX-1943|http://www.antweb.org/specimen.do?name=CASENT0120039-D01	B.L.Fisher et al.	03-Dec-2006	Madagascar	Toliara		Ivohibe 200	Foret Ivohibe 55.0km N Tolagnaro	-24.569	47.204		200
ASAMY401-07	CASENT0120040-D01	Arthropoda	Insecta	Hymenoptera	Formicidae		Anochetus	Anochetus madagascarensis	Brian Fisher	bfisher@calacademy.org						Libanona 2006	under stone|coastal scrub|1w|BOX-1943|http://www.antweb.org/specimen.do?name=CASENT0120040-D01	B.L.Fisher et al.	01-Dec-2006	Madagascar	Toliara		Libanona 2006	Libanona beach, Tolagnaro	-25.039	46.996		20
ASAMY402-07	CASENT0120041-D01	Arthropoda	Insecta	Hymenoptera	Formicidae		Anochetus	Anochetus madagascarensis	Brian Fisher	bfisher@calacademy.org						Libanona 2006	on low vegetation, trunk of Australiana pine|coastal scrub|1w|BOX-1943|http://www.antweb.org/specimen.do?name=CASENT0120041-D01	B.L.Fisher et al.	01-Dec-2006	Madagascar	Toliara		Libanona 2006	Libanona beach, Tolagnaro	-25.039	46.996		20
ASAMY403-07	CASENT0120044-D01	Arthropoda	Insecta	Hymenoptera	Formicidae		Anochetus	Anochetus madagascarensis	Brian Fisher	bfisher@calacademy.org						Libanona 2006	on tree trunk, Australiana pine|coastal scrub|1w|BOX-1943|http://www.antweb.org/specimen.do?name=CASENT0120044-D01	B.L.Fisher et al.	01-Dec-2006	Madagascar	Toliara		Libanona 2006	Libanona beach, Tolagnaro	-25.039	46.996		20
ASAMY404-07	CASENT0120045-D01	Arthropoda	Insecta	Hymenoptera	Formicidae		Anochetus	Anochetus grandidieri	Brian Fisher	bfisher@calacademy.org						Manatantely 100	ex rotten log|rainforest|1w|BOX-1943|http://www.antweb.org/specimen.do?name=CASENT0120045-D01	B.L.Fisher et al.	27-Nov-2006	Madagascar	Toliara		Manatantely 100	8.9km NW Tolagnaro	-24.982	46.926		100
ASAMY416-07	CASENT0120194-D01	Arthropoda	Insecta	Hymenoptera	Formicidae		Anochetus	Anochetus madagascarensis	Brian Fisher	bfisher@calacademy.org						Manatantely 100	ex rotten log|rainforest|1w|BOX-1943|http://www.antweb.org/specimen.do?name=CASENT0120194-D01	B.L.Fisher et al.	27-Nov-2006	Madagascar	Toliara		Manatantely 100	8.9km NW Tolagnaro	-24.982	46.926		100
ASAMY417-07	CASENT0120195-D01	Arthropoda	Insecta	Hymenoptera	Formicidae		Anochetus	Anochetus grandidieri	Brian Fisher	bfisher@calacademy.org						Ando Tanatana	under stone|rainforest|1w|BOX-1943|http://www.antweb.org/specimen.do?name=CASENT0120195-D01	B.L.Fisher et al.	23-Nov-2006	Madagascar	Toliara		Ando Tanatana	Parc National Andohahela, Col de Tanatana, 33.3km NW Tolagnaro	-24.758	46.854		275
ASAMY418-07	CASENT0120196-D01	Arthropoda	Insecta	Hymenoptera	Formicidae		Anochetus	Anochetus grandidieri	Brian Fisher	bfisher@calacademy.org						Ando Tanatana	under stone|rainforest|1w|BOX-1943|http://www.antweb.org/specimen.do?name=CASENT0120196-D01	B.L.Fisher et al.	23-Nov-2006	Madagascar	Toliara		Ando Tanatana	Parc National Andohahela, Col de Tanatana, 33.3km NW Tolagnaro	-24.758	46.854		275
ASAMY419-07	CASENT0120197-D01	Arthropoda	Insecta	Hymenoptera	Formicidae		Anochetus	Anochetus madagascarensis	Brian Fisher	bfisher@calacademy.org						Ando Tanatana	ex rotten log|rainforest|1w|BOX-1943|http://www.antweb.org/specimen.do?name=CASENT0120197-D01	B.L.Fisher et al.	22-Nov-2006	Madagascar	Toliara		Ando Tanatana	Parc National Andohahela, Col de Tanatana, 33.3km NW Tolagnaro	-24.758	46.854		275
ASAMY420-07	CASENT0120328-D01	Arthropoda	Insecta	Hymenoptera	Formicidae		Anochetus	Anochetus madagascarensis	Brian Fisher	bfisher@calacademy.org						Ivohibe 200	ex rotten log|rainforest|1w|BOX-1943|http://www.antweb.org/specimen.do?name=CASENT0120328-D01	B.L.Fisher et al.	03-Dec-2006	Madagascar	Toliara		Ivohibe 200	Foret Ivohibe 55.0km N Tolagnaro	-24.569	47.204		200
ASAMY421-07	CASENT0120329-D01	Arthropoda	Insecta	Hymenoptera	Formicidae		Anochetus	Anochetus madagascarensis	Brian Fisher	bfisher@calacademy.org						Manatantely 100	ex rotten log|rainforest|1w|BOX-1943|http://www.antweb.org/specimen.do?name=CASENT0120329-D01	B.L.Fisher et al.	27-Nov-2006	Madagascar	Toliara		Manatantely 100	8.9km NW Tolagnaro	-24.982	46.926		100
ASAMY422-07	CASENT0120330-D01	Arthropoda	Insecta	Hymenoptera	Formicidae		Anochetus	Anochetus madagascarensis	Brian Fisher	bfisher@calacademy.org						Ivohibe 200	ex rotten log|rainforest|1w|BOX-1943|http://www.antweb.org/specimen.do?name=CASENT0120330-D01	B.L.Fisher et al.	03-Dec-2006	Madagascar	Toliara		Ivohibe 200	Foret Ivohibe 55.0km N Tolagnaro	-24.569	47.204		200
ASAMY423-07	CASENT0120331-D01	Arthropoda	Insecta	Hymenoptera	Formicidae		Anochetus	Anochetus madagascarensis	Brian Fisher	bfisher@calacademy.org						Ivohibe 200	ex rotting tree stump|rainforest|1w|BOX-1943|http://www.antweb.org/specimen.do?name=CASENT0120331-D01	B.L.Fisher et al.	03-Dec-2006	Madagascar	Toliara		Ivohibe 200	Foret Ivohibe 55.0km N Tolagnaro	-24.569	47.204		200
ASAMY424-07	CASENT0120332-D01	Arthropoda	Insecta	Hymenoptera	Formicidae		Anochetus	Anochetus grandidieri	Brian Fisher	bfisher@calacademy.org						Lavasoa	ex rotten log|rainforest|1w|BOX-1943|http://www.antweb.org/specimen.do?name=CASENT0120332-D01	B.L.Fisher et al.	30-Nov-2006	Madagascar	Toliara		Lavasoa	Grand Lavasoa, 25.9km W Tolagnaro	-25.088	46.749		450
ASAMY425-07	CASENT0120333-D01	Arthropoda	Insecta	Hymenoptera	Formicidae		Anochetus	Anochetus madagascarensis	Brian Fisher	bfisher@calacademy.org						Lavasoa	ex rotten log|rainforest|1w|BOX-1943|http://www.antweb.org/specimen.do?name=CASENT0120333-D01	B.L.Fisher et al.	30-Nov-2006	Madagascar	Toliara		Lavasoa	Grand Lavasoa, 25.9km W Tolagnaro	-25.088	46.749		450
ASAMY426-07	CASENT0120334-D01	Arthropoda	Insecta	Hymenoptera	Formicidae		Anochetus	Anochetus grandidieri	Brian Fisher	bfisher@calacademy.org						Ando Tanatana	under stone|rainforest|1w|BOX-1943|http://www.antweb.org/specimen.do?name=CASENT0120334-D01	B.L.Fisher et al.	23-Nov-2006	Madagascar	Toliara		Ando Tanatana	Parc National Andohahela, Col de Tanatana, 33.3km NW Tolagnaro	-24.758	46.854		275
ASAMY427-07	CASENT0120335-D01	Arthropoda	Insecta	Hymenoptera	Formicidae		Anochetus	Anochetus madagascarensis	Brian Fisher	bfisher@calacademy.org						Mandena 2006	ex rotten log|littoral rainforest|1w|BOX-1943|http://www.antweb.org/specimen.do?name=CASENT0120335-D01	B.L.Fisher et al.	05-Dec-2006	Madagascar	Toliara		Mandena 2006	Foret Mandena 8.5 km N Tolagnaro	-24.953	47.002		20
ASAMY428-07	CASENT0120336-D01	Arthropoda	Insecta	Hymenoptera	Formicidae		Anochetus	Anochetus grandidieri	Brian Fisher	bfisher@calacademy.org						Ivohibe 200	under moss, litter on rock|rainforest|1w|BOX-1943|http://www.antweb.org/specimen.do?name=CASENT0120336-D01	B.L.Fisher et al.	03-Dec-2006	Madagascar	Toliara		Ivohibe 200	Foret Ivohibe 55.0km N Tolagnaro	-24.569	47.204		200
ASAMY429-07	CASENT0120337-D01	Arthropoda	Insecta	Hymenoptera	Formicidae		Anochetus	Anochetus grandidieri	Brian Fisher	bfisher@calacademy.org						Ando Tanatana	ex rotten log|rainforest|1w|BOX-1943|http://www.antweb.org/specimen.do?name=CASENT0120337-D01	B.L.Fisher et al.	23-Nov-2006	Madagascar	Toliara		Ando Tanatana	Parc National Andohahela, Col de Tanatana, 33.3km NW Tolagnaro	-24.758	46.854		275
ASAMY430-07	CASENT0120338-D01	Arthropoda	Insecta	Hymenoptera	Formicidae		Anochetus	Anochetus madagascarensis	Brian Fisher	bfisher@calacademy.org						Manatantely 100	under rotten log|rainforest|1w|BOX-1943|http://www.antweb.org/specimen.do?name=CASENT0120338-D01	B.L.Fisher et al.	27-Nov-2006	Madagascar	Toliara		Manatantely 100	8.9km NW Tolagnaro	-24.982	46.926		100
ASAMX868-06	CASENT0172611-D01	Arthropoda	Insecta	Hymenoptera	Formicidae		Anochetus	Anochetus pattersoni	Brian Fisher	bfisher@calacademy.org						Picard	ex malaise trap 6m||right hind leg of male|BOX-1233|http://www.antweb.org/specimen.do?name=CASENT0172611-D01	K.Mach & O.Maurel	22-Sep-2005	Seychelles			Picard	Aldabra Islands, Picard
ASAMX869-06	CASENT0172617-D01	Arthropoda	Insecta	Hymenoptera	Formicidae		Anochetus	Anochetus pattersoni	Brian Fisher	bfisher@calacademy.org						Picard	||right hind leg of male|BOX-1233|http://www.antweb.org/specimen.do?name=CASENT0172617-D01	K.Mach & O.Maurel	22-May-2005	Seychelles			Picard	Aldabra Islands, Picard
ASAMY064-07	CASENT0172667-D01	Arthropoda	Insecta	Hymenoptera	Formicidae		Odontomachus	Odontomachus simillimus	Brian Fisher	bfisher@calacademy.org						Jardin Marron L1	||right hind leg of worker|BOX-1938|http://www.antweb.org/specimen.do?name=CASENT0172667-D01	J.Gerlach	05-Jul-2000	Seychelles			Jardin Marron L1	Silhouette Island, Jardin Marron
ASAMY065-07	CASENT0172668-D01	Arthropoda	Insecta	Hymenoptera	Formicidae		Odontomachus	Odontomachus simillimus	Brian Fisher	bfisher@calacademy.org						Siewa camp	under bark of rotting branch in litter|lowland secondary rainforest|right hind leg of dealate Queen|BOX-1938|http://www.antweb.org/specimen.do?name=CASENT0172668-D01	R.R.Snelling	10-Apr-1998	Indonesia		Irian Jaya	Siewa camp	PT. Freeport Concession, Siewa camp	-3.04	136.38		61
ASAM937-05	CASENT0400528-D01	Arthropoda	Insecta	Hymenoptera	Formicidae		Odontomachus	Odontomachus troglodytes	Brian Fisher	bfisher@calacademy.org						Sangha 420	EC19 sifted litter|rainforest|1w|BOX-0422|http://www.antweb.org/specimen.do?name=CASENT0400528-D01	B.L.Fisher	10-May-2001	Central African Republic	Sangha-Mbaere		Sangha 420	Reserve Speciale de Foret Dense de Dzanga-Sangha, 12.7 km 326° NW Bayanga	3.005	16.193		420
ASAM939-05	CASENT0400537-D01	Arthropoda	Insecta	Hymenoptera	Formicidae		Odontomachus	Odontomachus assiniensis	Brian Fisher	bfisher@calacademy.org						Sangha 420	EC19 sifted litter|rainforest|1w|BOX-0422|http://www.antweb.org/specimen.do?name=CASENT0400537-D01	B.L.Fisher	10-May-2001	Central African Republic	Sangha-Mbaere		Sangha 420	Reserve Speciale de Foret Dense de Dzanga-Sangha, 12.7 km 326° NW Bayanga	3.005	16.193		420
ASAM004-05	CASENT0416372-D01	Arthropoda	Insecta	Hymenoptera	Formicidae		Anochetus	Anochetus goodmani	Brian Fisher	bfisher@calacademy.org						Ankarana 80	EF18 ground nest|tropical dry forest|1w|BOX-0168|http://www.antweb.org/specimen.do?name=CASENT0416372-D01	Fisher, Griswold et al.	10-Feb-2001	Madagascar	Antsiranana, Faritany d'		Ankarana 80	Reserve Speciale de l'Ankarana, 22.9 km 224° SW Anivorano Nord	-12.909	49.11		80
ASAM005-05	CASENT0416372-D02	Arthropoda	Insecta	Hymenoptera	Formicidae		Anochetus	Anochetus goodmani	Brian Fisher	bfisher@calacademy.org						Ankarana 80	EF18 ground nest|tropical dry forest|1w|BOX-0168|http://www.antweb.org/specimen.do?name=CASENT0416372-D02	Fisher, Griswold et al.	10-Feb-2001	Madagascar	Antsiranana, Faritany d'		Ankarana 80	Reserve Speciale de l'Ankarana, 22.9 km 224° SW Anivorano Nord	-12.909	49.11		80
ASAM006-05	CASENT0416382-D01	Arthropoda	Insecta	Hymenoptera	Formicidae		Anochetus	Anochetus goodmani	Brian Fisher	bfisher@calacademy.org						Ankarana 210	EF18 ground nest|tropical dry forest|1w|BOX-0168|http://www.antweb.org/specimen.do?name=CASENT0416382-D01	Fisher, Griswold et al.	16-Feb-2001	Madagascar	Antsiranana, Faritany d'		Ankarana 210	Reserve Speciale de l'Ankarana, 13.6 km 192° SSW Anivorano Nord	-12.864	49.226		210
ASAM007-05	CASENT0416382-D02	Arthropoda	Insecta	Hymenoptera	Formicidae		Anochetus	Anochetus goodmani	Brian Fisher	bfisher@calacademy.org						Ankarana 210	EF18 ground nest|tropical dry forest|1w|BOX-0168|http://www.antweb.org/specimen.do?name=CASENT0416382-D02	Fisher, Griswold et al.	16-Feb-2001	Madagascar	Antsiranana, Faritany d'		Ankarana 210	Reserve Speciale de l'Ankarana, 13.6 km 192° SSW Anivorano Nord	-12.864	49.226		210
JDWAM824-05	CASENT0416394-D01	Arthropoda	Insecta	Hymenoptera	Formicidae		Anochetus	Anochetus madagascarensis	Brian Fisher	bfisher@calacademy.org						Sakaramy 325	EF13 ex rotten log|tropical dry forest|1w|BOX-0167|http://www.antweb.org/specimen.do?name=CASENT0416394-D01	Fisher, Griswold et al.	26-Jan-2001	Madagascar	Antsiranana, Faritany d'		Sakaramy 325	Reserve Speciale d'Ambre, 3.5 km 235° SW Sakaramy	-12.469	49.242		325
JDWAM825-05	CASENT0416416-D01	Arthropoda	Insecta	Hymenoptera	Formicidae		Anochetus	Anochetus madagascarensis	Brian Fisher	bfisher@calacademy.org						Orangea 90	EG13 ex rotten log|littoral rainforest|1w, 1p|BOX-0167|http://www.antweb.org/specimen.do?name=CASENT0416416-D01	Fisher, Griswold et al.	22-Feb-2001	Madagascar	Antsiranana, Faritany d'		Orangea 90	Foret d'Orangea, 3.6 km 128° SE Remena	-12.259	49.375		90
JDWAM826-05	CASENT0416418-D01	Arthropoda	Insecta	Hymenoptera	Formicidae		Anochetus	Anochetus madagascarensis	Brian Fisher	bfisher@calacademy.org						Ambilanivy 600	EC13 ex rotten log|rainforest|1w, 1l|BOX-0167|http://www.antweb.org/specimen.do?name=CASENT0416418-D01	Fisher, Griswold et al.	04-Mar-2001	Madagascar	Antsiranana, Faritany d'		Ambilanivy 600	Ampasindava, Foret d'Ambilanivy, 3.9 km 181° S Ambaliha	-13.799	48.162		600
JDWAM827-05	CASENT0416427-D01	Arthropoda	Insecta	Hymenoptera	Formicidae		Anochetus	Anochetus madagascarensis	Brian Fisher	bfisher@calacademy.org						Ankarana 210	EF13 ex rotten log|tropical dry forest|1w, 1p|BOX-0167|http://www.antweb.org/specimen.do?name=CASENT0416427-D01	Fisher, Griswold et al.	16-Feb-2001	Madagascar	Antsiranana, Faritany d'		Ankarana 210	Reserve Speciale de l'Ankarana, 13.6 km 192° SSW Anivorano Nord	-12.864	49.226		210
JDWAM828-05	CASENT0416432-D01	Arthropoda	Insecta	Hymenoptera	Formicidae		Anochetus	Anochetus madagascarensis	Brian Fisher	bfisher@calacademy.org						Ankarana 210	EF25 ex rotting tree stump|tropical dry forest|1w, 1l|BOX-0167|http://www.antweb.org/specimen.do?name=CASENT0416432-D01	Fisher, Griswold et al.	16-Feb-2001	Madagascar	Antsiranana, Faritany d'		Ankarana 210	Reserve Speciale de l'Ankarana, 13.6 km 192° SSW Anivorano Nord	-12.864	49.226		210
JDWAM804-05	CASENT0416435-D01	Arthropoda	Insecta	Hymenoptera	Formicidae		Anochetus	Anochetus grandidieri	Brian Fisher	bfisher@calacademy.org						Ambre 925	EB03 ex rotten log|montane rainforest|1w|BOX-0167|http://www.antweb.org/specimen.do?name=CASENT0416435-D01	Fisher, Griswold et al.	20-Jan-2001	Madagascar	Antsiranana, Faritany d'		Ambre 925	Parc National Montagne d'Ambre, 3.6 km 235° SW Joffreville	-12.534	49.18		925
JDWAM829-05	CASENT0425001-D01	Arthropoda	Insecta	Hymenoptera	Formicidae		Anochetus	Anochetus madagascarensis	Brian Fisher	bfisher@calacademy.org						Tsimaloto 135	EF13 ex rotten log|tropical dry forest|1w, 1p|BOX-0167|http://www.antweb.org/specimen.do?name=CASENT0425001-D01	Fisher, Griswold et al.	02-Apr-2001	Madagascar	Mahajanga		Tsimaloto 135	Parc National d'Ankarafantsika, Foret de Tsimaloto, 18.3 km 46° NE de Tsaramandroso	-16.228	47.144		135
JDWAM844-05	CASENT0428100-D01	Arthropoda	Insecta	Hymenoptera	Formicidae		Anochetus	Anochetus goodmani	Brian Fisher	bfisher@calacademy.org						Ankarana 80	EF18 ground nest|tropical dry forest|1w|BOX-0167|http://www.antweb.org/specimen.do?name=CASENT0428100-D01	Fisher, Griswold et al.	10-Feb-2001	Madagascar	Antsiranana, Faritany d'		Ankarana 80	Reserve Speciale de l'Ankarana, 22.9 km 224° SW Anivorano Nord	-12.909	49.11		80
ASAM001-05	CASENT0428100-D02	Arthropoda	Insecta	Hymenoptera	Formicidae		Anochetus	Anochetus goodmani	Brian Fisher	bfisher@calacademy.org						Ankarana 80	EF18 ground nest|tropical dry forest|1w|BOX-0168|http://www.antweb.org/specimen.do?name=CASENT0428100-D02	Fisher, Griswold et al.	10-Feb-2001	Madagascar	Antsiranana, Faritany d'		Ankarana 80	Reserve Speciale de l'Ankarana, 22.9 km 224° SW Anivorano Nord	-12.909	49.11		80
ASAM002-05	CASENT0428105-D01	Arthropoda	Insecta	Hymenoptera	Formicidae		Anochetus	Anochetus goodmani	Brian Fisher	bfisher@calacademy.org						Ankarana 80	EF18 ground nest|tropical dry forest|1w|BOX-0168|http://www.antweb.org/specimen.do?name=CASENT0428105-D01	Fisher, Griswold et al.	10-Feb-2001	Madagascar	Antsiranana, Faritany d'		Ankarana 80	Reserve Speciale de l'Ankarana, 22.9 km 224° SW Anivorano Nord	-12.909	49.11		80
ASAM003-05	CASENT0428105-D02	Arthropoda	Insecta	Hymenoptera	Formicidae		Anochetus	Anochetus goodmani	Brian Fisher	bfisher@calacademy.org						Ankarana 80	EF18 ground nest|tropical dry forest|1w|BOX-0168|http://www.antweb.org/specimen.do?name=CASENT0428105-D02	Fisher, Griswold et al.	10-Feb-2001	Madagascar	Antsiranana, Faritany d'		Ankarana 80	Reserve Speciale de l'Ankarana, 22.9 km 224° SW Anivorano Nord	-12.909	49.11		80
JDWAM830-05	CASENT0430591-D01	Arthropoda	Insecta	Hymenoptera	Formicidae		Anochetus	Anochetus madagascarensis	Brian Fisher	bfisher@calacademy.org						Vazimba 50	EF13 ex rotten log|tropical dry forest|1w|BOX-0167|http://www.antweb.org/specimen.do?name=CASENT0430591-D01	Fisher-Griswold Arthropod Team	06-Nov-2001	Madagascar	Mahajanga		Vazimba 50	Parc National Tsingy de Bemaraha, 3.4 km 93° E Bekopaka, Tombeau Vazimba	-19.142	44.828		50
JDWAM019-04	CASENT0430591-D02	Arthropoda	Insecta	Hymenoptera	Formicidae		Anochetus	Anochetus madagascarensis	Brian Fisher	bfisher@calacademy.org						Vazimba 50	EF13 ex rotten log|tropical dry forest|1w|f Guelph|http://www.antweb.org/specimen.do?name=CASENT0505298|CASENT0505298	Fisher-Griswold Arthropod Team	06-Nov-2001	Madagascar	Mahajanga		Vazimba 50	Parc National Tsingy de Bemaraha, 3.4 km 93° E Bekopaka, Tombeau Vazimba	-19.142	44.828		50
JDWAM845-05	CASENT0432938-D01	Arthropoda	Insecta	Hymenoptera	Formicidae		Anochetus	Anochetus goodmani	Brian Fisher	bfisher@calacademy.org						Vazimba 50	EF19 sifted litter (leaf mold, rotten wood)|tropical dry forest|1w|BOX-0167|http://www.antweb.org/specimen.do?name=CASENT0432938-D01	Fisher-Griswold Arthropod Team	06-Nov-2001	Madagascar	Mahajanga		Vazimba 50	Parc National Tsingy de Bemaraha, 3.4 km 93° E Bekopaka, Tombeau Vazimba	-19.142	44.828		50
ASAM008-05	CASENT0432938-D02	Arthropoda	Insecta	Hymenoptera	Formicidae		Anochetus	Anochetus goodmani	Brian Fisher	bfisher@calacademy.org						Vazimba 50	EF19 sifted litter (leaf mold, rotten wood)|tropical dry forest|1w|BOX-0168|http://www.antweb.org/specimen.do?name=CASENT0432938-D02	Fisher-Griswold Arthropod Team	06-Nov-2001	Madagascar	Mahajanga		Vazimba 50	Parc National Tsingy de Bemaraha, 3.4 km 93° E Bekopaka, Tombeau Vazimba	-19.142	44.828		50
ASAM009-05	CASENT0432964-D01	Arthropoda	Insecta	Hymenoptera	Formicidae		Anochetus	Anochetus goodmani	Brian Fisher	bfisher@calacademy.org						Vazimba 50	EF19 sifted litter (leaf mold, rotten wood)|tropical dry forest|1w|BOX-0168|http://www.antweb.org/specimen.do?name=CASENT0432964-D01	Fisher-Griswold Arthropod Team	06-Nov-2001	Madagascar	Mahajanga		Vazimba 50	Parc National Tsingy de Bemaraha, 3.4 km 93° E Bekopaka, Tombeau Vazimba	-19.142	44.828		50
JDWAM805-05	CASENT0437642-D01	Arthropoda	Insecta	Hymenoptera	Formicidae		Anochetus	Anochetus grandidieri	Brian Fisher	bfisher@calacademy.org						Andranopasazy 150	EF13 ex rotten log|tropical dry forest on Tsingy|1w, 1p|BOX-0167|http://www.antweb.org/specimen.do?name=CASENT0437642-D01	Fisher-Griswold Arthropod Team	16-Nov-2001	Madagascar	Mahajanga		Andranopasazy 150	Parc National Tsingy de Bemaraha, 10.6 km ESE 123° Antsalova	-18.709	44.718		150
JDWAM806-05	CASENT0441723-D01	Arthropoda	Insecta	Hymenoptera	Formicidae		Anochetus	Anochetus grandidieri	Brian Fisher	bfisher@calacademy.org						Andranopasazy 150	EF13 ex rotten log|tropical dry forest on Tsingy|1w, 1l|BOX-0167|http://www.antweb.org/specimen.do?name=CASENT0441723-D01	Fisher-Griswold Arthropod Team	16-Nov-2001	Madagascar	Mahajanga		Andranopasazy 150	Parc National Tsingy de Bemaraha, 10.6 km ESE 123° Antsalova	-18.709	44.718		150
JDWAM831-05	CASENT0447693-D01	Arthropoda	Insecta	Hymenoptera	Formicidae		Anochetus	Anochetus madagascarensis	Brian Fisher	bfisher@calacademy.org						Bealoka 35	ER13 ex rotten log|gallery forest|1w|BOX-0167|http://www.antweb.org/specimen.do?name=CASENT0447693-D01	Fisher-Griswold Arthropod Team	03-Feb-2002	Madagascar	Toliara		Bealoka 35	Reserve Prive Berenty, Foret de Bealoka, Mandrare River, 14.6 km 329° NNW Amboasary	-24.957	46.272		35
JDWAM807-05	CASENT0454549-D01	Arthropoda	Insecta	Hymenoptera	Formicidae		Anochetus	Anochetus grandidieri	Brian Fisher	bfisher@calacademy.org						Ambilanivy 600	EC19 sifted litter|rainforest|1w|BOX-0167|http://www.antweb.org/specimen.do?name=CASENT0454549-D01	Fisher, Griswold et al.	04-Mar-2001	Madagascar	Antsiranana, Faritany d'		Ambilanivy 600	Ampasindava, Foret d'Ambilanivy, 3.9 km 181° S Ambaliha	-13.799	48.162		600
JDWAM810-05	CASENT0460234-D01	Arthropoda	Insecta	Hymenoptera	Formicidae		Anochetus	Anochetus grandidieri	Brian Fisher	bfisher@calacademy.org						Anabohazo 120	EF19 sifted litter|tropical dry forest|1w|BOX-0167|http://www.antweb.org/specimen.do?name=CASENT0460234-D01	Fisher, Griswold et al.	11-Mar-2001	Madagascar	Antsiranana, Faritany d'		Anabohazo 120	Foret d'Anabohazo, 21.6 km 247° WSW Maromandia	-14.309	47.914		120
JDWAM832-05	CASENT0460281-D01	Arthropoda	Insecta	Hymenoptera	Formicidae		Anochetus	Anochetus madagascarensis	Brian Fisher	bfisher@calacademy.org						Anabohazo 120	EF19 sifted litter|tropical dry forest|1w|BOX-0167|http://www.antweb.org/specimen.do?name=CASENT0460281-D01	Fisher, Griswold et al.	11-Mar-2001	Madagascar	Antsiranana, Faritany d'		Anabohazo 120	Foret d'Anabohazo, 21.6 km 247° WSW Maromandia	-14.309	47.914		120
JDWAM811-05	CASENT0460284-D01	Arthropoda	Insecta	Hymenoptera	Formicidae		Anochetus	Anochetus grandidieri	Brian Fisher	bfisher@calacademy.org						Anabohazo 120	EF19 sifted litter|tropical dry forest|1w|BOX-0167|http://www.antweb.org/specimen.do?name=CASENT0460284-D01	Fisher, Griswold et al.	11-Mar-2001	Madagascar	Antsiranana, Faritany d'		Anabohazo 120	Foret d'Anabohazo, 21.6 km 247° WSW Maromandia	-14.309	47.914		120
JDWAM833-05	CASENT0461621-D01	Arthropoda	Insecta	Hymenoptera	Formicidae		Anochetus	Anochetus madagascarensis	Brian Fisher	bfisher@calacademy.org						Lokobe 30	EC19 sifted litter|rainforest|1w|BOX-0167|http://www.antweb.org/specimen.do?name=CASENT0461621-D01	Fisher, Griswold et al.	19-Mar-2001	Madagascar	Antsiranana, Faritany d'		Lokobe 30	Nosy Be, Reserve Naturelle Integrale de Lokobe, 6.3 km 112° ESE Hellville	-13.419	48.331		30
ASAM010-05	CASENT0472827-D01	Arthropoda	Insecta	Hymenoptera	Formicidae		Anochetus	Anochetus goodmani	Brian Fisher	bfisher@calacademy.org						Andranopasazy 150	EF19 sifted litter (leaf mold, rotten wood)|tropical dry forest on Tsingy|1w|BOX-0168|http://www.antweb.org/specimen.do?name=CASENT0472827-D01	Fisher-Griswold Arthropod Team	16-Nov-2001	Madagascar	Mahajanga		Andranopasazy 150	Parc National Tsingy de Bemaraha, 10.6 km ESE 123° Antsalova	-18.709	44.718		150
JDWAM813-05	CASENT0485697-D01	Arthropoda	Insecta	Hymenoptera	Formicidae		Anochetus	Anochetus grandidieri	Brian Fisher	bfisher@calacademy.org						Ranohira 725	ER19 sifted litter (leaf mold, rotten wood)|gallery forest|1w|BOX-0167|http://www.antweb.org/specimen.do?name=CASENT0485697-D01	Fisher, Griswold et al.	27-Jan-2003	Madagascar	Fianarantsoa		Ranohira 725	Parc National d'Isalo, 9.1 km 354° N Ranohira	-22.482	45.462		725
ASAM3663-05	CASENT0486815-D01	Arthropoda	Insecta	Hymenoptera	Formicidae		Odontomachus	Odontomachus coquereli	Brian Fisher	bfisher@calacademy.org						Marojejy 1325	EB03 ex rotten log|montane rainforest|right hind leg of worker|BOX-0588|http://www.antweb.org/specimen.do?name=CASENT0486815-D01	B.L.Fisher	19-Nov-2003	Madagascar	Antsiranana, Faritany d'		Marojejy 1325	Parc National de Marojejy, Antranohofa, 26.6 km 31° NNE Andapa, 10.7 km 318° NW Manantenina	-14.443	49.743		1325
ASAM3664-05	CASENT0486825-D01	Arthropoda	Insecta	Hymenoptera	Formicidae		Odontomachus	Odontomachus coquereli	Brian Fisher	bfisher@calacademy.org						Marojejy 1325	EB02 ground forager(s)|montane rainforest|right hind leg of worker|BOX-0588|http://www.antweb.org/specimen.do?name=CASENT0486825-D01	B.L.Fisher	20-Nov-2003	Madagascar	Antsiranana, Faritany d'		Marojejy 1325	Parc National de Marojejy, Antranohofa, 26.6 km 31° NNE Andapa, 10.7 km 318° NW Manantenina	-14.443	49.743		1325
ASAM3665-05	CASENT0486860-D01	Arthropoda	Insecta	Hymenoptera	Formicidae		Odontomachus	Odontomachus coquereli	Brian Fisher	bfisher@calacademy.org						Marojejy 1325	EB17 beating low vegetation|montane rainforest|right hind leg of worker|BOX-0588|http://www.antweb.org/specimen.do?name=CASENT0486860-D01	B.L.Fisher	19-Nov-2003	Madagascar	Antsiranana, Faritany d'		Marojejy 1325	Parc National de Marojejy, Antranohofa, 26.6 km 31° NNE Andapa, 10.7 km 318° NW Manantenina	-14.443	49.743		1325
ASAM868-05	CASENT0487419-D01	Arthropoda	Insecta	Hymenoptera	Formicidae		Odontomachus	Odontomachus coquereli	Brian Fisher	bfisher@calacademy.org						Binara 1100	EB03 ex rotten log|montane rainforest|1l|BOX-0422|http://www.antweb.org/specimen.do?name=CASENT0487419-D01	B.L.Fisher	05-Dec-2003	Madagascar	Antsiranana, Faritany d'		Binara 1100	Foret de Binara, 9.4km 235° SW Daraina	-13.263	49.6		1100
ASAM3669-05	CASENT0487426-D01	Arthropoda	Insecta	Hymenoptera	Formicidae		Odontomachus	Odontomachus coquereli	Brian Fisher	bfisher@calacademy.org						Binara 1100	EB03 ex rotten log|montane rainforest|right hind leg of worker|BOX-0588|http://www.antweb.org/specimen.do?name=CASENT0487426-D01	B.L.Fisher	06-Dec-2003	Madagascar	Antsiranana, Faritany d'		Binara 1100	Foret de Binara, 9.4km 235° SW Daraina	-13.263	49.6		1100
ASAM870-05	CASENT0487434-D01	Arthropoda	Insecta	Hymenoptera	Formicidae		Odontomachus	Odontomachus coquereli	Brian Fisher	bfisher@calacademy.org						Binara 1100	EB03 ex rotten log|montane rainforest|1w|BOX-0422|http://www.antweb.org/specimen.do?name=CASENT0487434-D01	B.L.Fisher	05-Dec-2003	Madagascar	Antsiranana, Faritany d'		Binara 1100	Foret de Binara, 9.4km 235° SW Daraina	-13.263	49.6		1100
ASAM3670-05	CASENT0487434-D02	Arthropoda	Insecta	Hymenoptera	Formicidae		Odontomachus	Odontomachus coquereli	Brian Fisher	bfisher@calacademy.org						Binara 1100	EB03 ex rotten log|montane rainforest|1w|BOX-0588|http://www.antweb.org/specimen.do?name=CASENT0487434-D02	B.L.Fisher	05-Dec-2003	Madagascar	Antsiranana, Faritany d'		Binara 1100	Foret de Binara, 9.4km 235° SW Daraina	-13.263	49.6		1100
[truncated: 86 more rows]

## Sheet: .xls]if exact lookup
	18S		ITS1		28S
CASENT0005967-D01		CASENT0005967-D01		CASENT0005967-D01		SID	PID	CO1	18S	ITS1	28S
[truncated: 549 more rows]
